# Supplementary material for: Exploring the electronic and steric effects on the dimerization of intramolecular frustrated Lewis pairs: a comparison between aminoboranes and aminoalanes
Source: Royal Society of Chemistry journal article supplement (doi:10.1039/d3dt04274j), 2024-01-01
Supplement: d3dt04274j1.pdf [file d3dt04274j1.pdf]

# Exploring the electronic and steric effects on the dimerization of intramolecular Frustrated Lewis Pairs: A comparison between aminoboranes and aminoalanes

## Supporting Information

César Barrales-Martínez<sup>a,\*</sup>, Claudio Illanes-Solis<sup>b</sup>, Rocío Durán<sup>a</sup> and Julio Caballero<sup>b</sup>

<sup>a</sup>Instituto de Investigación Interdisciplinaria (I<sup>3</sup>), Vicerrectoría Académica, Universidad de Talca, Campus Talca, Talca, Chile.

<sup>b</sup>Centro de Bioinformática, Simulación y Modelado (CBSM), Facultad de Ingeniería, Universidad de Talca, Campus Talca, Talca, Chile.

\*E-mail: [cesar.barrales@utalca.cl](mailto:cesar.barrales@utalca.cl)

## Table of Contents

|                                                                     |      |
|---------------------------------------------------------------------|------|
| 1. Computational details.....                                       | S1   |
| 2. Additional computational results .....                           | S2   |
| 3. Cartesian coordinates of aminoboranes .....                      | S3   |
| 3.1 Monomers .....                                                  | S3   |
| 3.2 Dimers.....                                                     | S50  |
| 4. Cartesian coordinates of aminoalanes .....                       | S69  |
| 4.1 Monomers.....                                                   | S69  |
| 4.2 Dimers .....                                                    | S124 |
| 5. Cartesian coordinates of systems with CF <sub>3</sub> group..... | S150 |
| 5.1 Aminoborane.....                                                | S150 |
| 5.2 Aminoalane.....                                                 | S153 |
| 6. References.....                                                  | S155 |

### 1. Computational Details

The hybrid meta-GGA functional M06-2X<sup>1</sup> with the basis set 6-31G(d,p) was employed to perform geometry optimization of the stationary points of the potential energy surface (PES), which were confirmed by performing vibrational analysis, where no imaginary frequencies were found for reactants and products. The electronic energy was corrected using the triple- $\zeta$  basis set def2-TZVP, keeping the same density functional. This methodology has shown to successfully describe the reactivity of FLP in activating small molecules, such as H<sub>2</sub> and CO<sub>2</sub>.<sup>2</sup> Gibbs free energy was computed from a statistical analysis at 298 K, employing the quasi-Rotor-Rigid-Harmonic-Oscillator (qRRHO) approximation,<sup>3</sup> with a threshold of 100 cm<sup>-1</sup>. The implicit solvent effects were included by using the Self-Consistent Reaction Field, employing the

solvent density model (SMD).<sup>4</sup> Benzene was chosen as the solvent, which has a dielectric constant of 2.2706. The solvent was only included in the correction of the electronic energy at M06-2X/def2-TZVP level of theory ( $E_{SMD}^{def2-TZVP}$ ), while the geometry optimization and thermal corrections were obtained in gas phase at the M06-2X/6-31G(d,p) level of theory ( $G_{thermal,gas}^{6-31G(d,p)}$ ). In this way, the final Gibbs free energy employed in this work is:

$$G = E_{SMD}^{def2-TZVP} + G_{thermal,gas}^{6-31G(d,p)} \quad (1)$$

All electronic structure calculations were computed in Gaussian09 package.<sup>5</sup> The EDA calculation was performed by mixing the wavefunctions of the fragments at the dimer geometry with Multiwfn program<sup>6</sup>, following a thermodynamic cycle and the Hess law, as described previously.<sup>7,8</sup> The qRRHO calculations were performed in GoodVibes package,<sup>3,9</sup> while the NCI index was obtained in NCIPLOT package.<sup>10</sup>

## 2. Additional computational results

**Table S1.** Overall energy change of dimerization ( $\Delta E$ ), distortion energy ( $\Delta E_{dist}$ ), interaction energy ( $\Delta E_{int}$ ), Pauli repulsion ( $\Delta E_{Pauli}$ ), electrostatic interaction ( $\Delta V_{elstat}$ ) and orbital interaction ( $\Delta E_{oi}$ ) for all the systems with boron and aluminum. All values are in kcal/mol.

| System                           | $\Delta E$ | $\Delta E_{dist}$ | $\Delta E_{int}$ | $\Delta E_{Pauli}$ | $\Delta V_{elstat}$ | $\Delta E_{oi}$ |
|----------------------------------|------------|-------------------|------------------|--------------------|---------------------|-----------------|
| Aminoboranes                     |            |                   |                  |                    |                     |                 |
| H/H                              | -48.5      | 44.1              | -92.6            | 234.6              | -171.3              | -155.9          |
| H/CH <sub>3</sub>                | -34.9      | 46.3              | -81.2            | 241.7              | -173.3              | -149.6          |
| H/ <i>t</i> -but                 | -6.9       | 75.1              | -82.0            | 245.3              | -177.0              | -150.3          |
| H/Ph                             | -33.6      | 52.3              | -86.0            | 263.7              | -186.2              | -163.5          |
| H/Mes                            | 13.2       | 86.5              | -73.3            | 267.3              | -184.7              | -155.8          |
| CH <sub>3</sub> /H               | -27.8      | 65.4              | -93.3            | 237.4              | -175.4              | -155.2          |
| CH <sub>3</sub> /CH <sub>3</sub> | 15.6       | 104.3             | -88.7            | 204.0              | -154.0              | -138.8          |
| CH <sub>3</sub> / <i>t</i> -but  | 110.3      | 196.2             | -88.7            | 260.9              | -189.3              | -157.4          |
| CH <sub>3</sub> /Ph              | 21.1       | 110.7             | -89.6            | 223.9              | -167.4              | -146.1          |
| <i>t</i> -but/H                  | 37.1       | 127.0             | -89.9            | 293.1              | -213.3              | -169.7          |
| Ph/H                             | -4.3       | 65.1              | -69.5            | 205.3              | -143.5              | -131.3          |
| Aminoalanes                      |            |                   |                  |                    |                     |                 |
| H/H                              | -37.3      | 42.6              | -79.9            | 115.2              | -126.6              | -68.5           |
| H/CH <sub>3</sub>                | -35.7      | 37.9              | -73.6            | 114.7              | -124.9              | -63.4           |
| H/ <i>t</i> -but                 | -24.7      | 54.3              | -79.0            | 124.0              | -134.8              | -68.1           |
| H/Ph                             | -38.7      | 42.0              | -80.6            | 128.9              | -138.3              | -71.3           |
| H/Mes                            | -21.0      | 55.0              | -76.1            | 132.5              | -136.7              | -71.9           |
| CH <sub>3</sub> /H               | -18.0      | 63.6              | -81.6            | 119.1              | -128.3              | -72.3           |
| CH <sub>3</sub> /CH <sub>3</sub> | -9.2       | 70.4              | -79.6            | 112.6              | -122.5              | -69.7           |
| CH <sub>3</sub> / <i>t</i> but   | 14.4       | 94.0              | -79.6            | 118.4              | -126.2              | -71.8           |
| CH <sub>3</sub> /Ph              | -12.8      | 76.1              | -88.9            | 131.2              | -141.9              | -78.1           |
| CH <sub>3</sub> /Mes             | 10.7       | 94.0              | -83.3            | 116.9              | -125.2              | -75.0           |
| <i>t</i> -but/H                  | 33.0       | 110.5             | -77.4            | 165.3              | -157.1              | -85.7           |
| Ph/H                             | -3.9       | 53.8              | -57.7            | 93.2               | -88.2               | -62.7           |
| Ph/CH <sub>3</sub>               | 10.0       | 63.2              | -53.2            | 87.0               | -89.2               | -51.0           |
| Ph/Ph                            | 16.1       | 95.0              | -78.9            | 118.9              | -117.8              | -79.9           |

### 3. Cartesian coordinates of aminoboranes

#### 3.1 Monomers

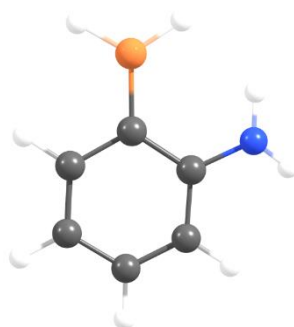

**Figure S1:** Computed structure of H/H (FLP)

Data for system: **H/H (FLP)**

```
#p m062x/6-31g(d,p) scf=(maxcycles=100) int=ultrafine nosymm freq opt
```

--Link1--

```
#p m062x/def2tzvp scf=(maxcycles=100) int=ultrafine nosymm guess=read geom=check  
SCRF=(Solvent=benzene,SMD)
```

SCF Done: E(RM062X) = -313.0288244 A.U.

Zero-point correction= 0.129906 (Hartree/Particle)

Thermal correction to Energy= 0.137106

Thermal correction to Enthalpy= 0.138050

Thermal correction to Gibbs Free Energy= 0.099111

Optimized Geometry (XYZ coordinates in Å)

|   |           |           |           |
|---|-----------|-----------|-----------|
| 6 | -1.279816 | 1.723933  | 0.563480  |
| 6 | 0.064843  | 1.891971  | 1.002296  |
| 5 | 1.138142  | 0.815398  | 0.875145  |
| 7 | -1.725362 | 0.526783  | 0.063437  |
| 6 | 0.417260  | 3.141213  | 1.562009  |
| 1 | 1.442094  | 3.267741  | 1.901032  |
| 6 | -0.476466 | 4.188096  | 1.681958  |
| 1 | -0.174552 | 5.135941  | 2.112333  |
| 6 | -2.189522 | 2.791969  | 0.683846  |
| 1 | -3.214353 | 2.658019  | 0.348768  |
| 6 | -1.788651 | 3.996303  | 1.231339  |
| 1 | -2.510697 | 4.803908  | 1.312262  |
| 1 | -2.571611 | 0.532661  | -0.482249 |
| 1 | 0.938866  | -0.245878 | 0.357041  |
| 1 | 2.235838  | 1.028385  | 1.292536  |
| 1 | -1.033340 | -0.152756 | -0.208474 |

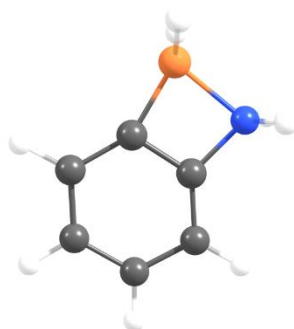

**Figure S2:** Computed structure of H/H (CLA)

Data for system: **H/H (CLA)**

```
#p m062x/6-31g(d,p) scf=(maxcycles=100) int=ultrafine nosymm freq opt
```

```
--Link1--
```

```
#p m062x/def2tzvp scf=(maxcycles=100) int=ultrafine nosymm guess=read geom=check
SCRF=(Solvent=benzene,SMD)
```

```
SCF Done: E(UM062X) = -313.0252836 A.U.
Zero-point correction=          0.131779 (Hartree/Particle)
Thermal correction to Energy=    0.138138
Thermal correction to Enthalpy=   0.139082
Thermal correction to Gibbs Free Energy=  0.101719
```

Optimized Geometry (XYZ coordinates in Å)

```
6  -1.267753  1.761523  0.616486
6  0.058362  1.877942  1.000983
5  0.385022  0.356975  0.564655
7  -1.308092  0.378568  0.131647
6  0.468867  3.100495  1.526744
1  1.491668  3.268793  1.850294
6  -0.471804  4.128521  1.634694
1  -0.169475  5.088668  2.042408
6  -2.237736  2.743760  0.701060
1  -3.265008  2.594371  0.382634
6  -1.800621  3.959640  1.231390
1  -2.499663  4.783335  1.332099
1  -1.913963  -0.241357  0.664604
1  1.017584  0.176489  -0.441344
1  0.530791  -0.464453  1.429960
1  -1.516897  0.281575  -0.859532
```

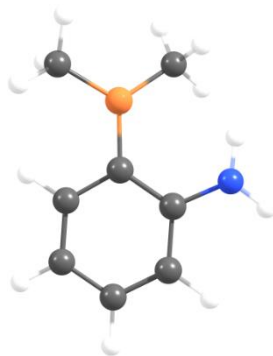

**Figure S3:** Computed structure of H/CH3 (FLP)

Data for system: **H/CH3 (FLP)**

```
#p m062x/6-31g(d,p) scf=(maxcycles=100) int=ultrafine nosymm freq opt
```

--Link1--

```
#p m062x/def2tzvp scf=(maxcycles=100) int=ultrafine nosymm guess=read geom=check  
SCRF=(Solvent=benzene,SMD)
```

SCF Done: E(UM062X) = -391.6742132 A.U.  
Zero-point correction= 0.187018 (Hartree/Particle)  
Thermal correction to Energy= 0.197616  
Thermal correction to Enthalpy= 0.198560  
Thermal correction to Gibbs Free Energy= 0.151364

Optimized Geometry (XYZ coordinates in Å)

|   |           |           |           |
|---|-----------|-----------|-----------|
| 6 | -1.554754 | 2.326681  | -0.373498 |
| 6 | -0.428234 | 2.218386  | 0.484742  |
| 5 | 0.692043  | 1.138224  | 0.383498  |
| 7 | -1.868162 | 1.352659  | -1.303656 |
| 6 | -0.278358 | 3.219625  | 1.466167  |
| 1 | 0.571788  | 3.152487  | 2.139468  |
| 6 | -1.140069 | 4.296954  | 1.592564  |
| 1 | -0.974558 | 5.054153  | 2.350684  |
| 6 | -2.440013 | 3.410978  | -0.236641 |
| 1 | -3.301882 | 3.473494  | -0.896014 |
| 6 | -2.230681 | 4.382553  | 0.725357  |
| 1 | -2.927296 | 5.212097  | 0.803799  |
| 1 | -2.487294 | 1.631885  | -2.048586 |
| 1 | -1.135285 | 0.726718  | -1.590085 |
| 6 | 1.025463  | 0.328244  | -0.941206 |
| 1 | 0.427761  | -0.595910 | -0.958565 |
| 1 | 0.827617  | 0.867807  | -1.873167 |
| 1 | 2.069647  | 0.002005  | -0.955098 |
| 6 | 1.630082  | 0.840600  | 1.621416  |
| 1 | 2.553347  | 1.426227  | 1.500867  |
| 1 | 1.210712  | 1.089577  | 2.598507  |
| 1 | 1.948212  | -0.207113 | 1.632528  |

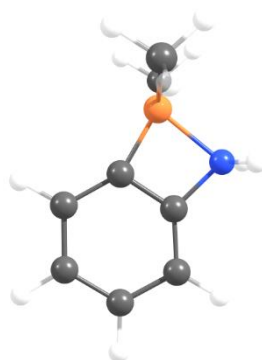

**Figure S4:** Computed structure of H/CH3 (CLA)

Data for system: **H/CH3 (CLA)**

```
#p m062x/6-31g(d,p) scf=(maxcycles=100) int=ultrafine nosymm freq opt
```

--Link1--

```
#p m062x/def2tzvp scf=(maxcycles=100) int=ultrafine nosymm guess=read geom=check
SCRF=(Solvent=benzene,SMD)
```

```
SCF Done: E(RM062X) = -391.6653272 A.U.
Zero-point correction=          0.188031 (Hartree/Particle)
Thermal correction to Energy=    0.197985
Thermal correction to Enthalpy=  0.198929
Thermal correction to Gibbs Free Energy=  0.153700
```

Optimized Geometry (XYZ coordinates in Å)

|   |           |           |           |
|---|-----------|-----------|-----------|
| 6 | -0.382308 | 0.570284  | -0.032634 |
| 6 | -0.220492 | -0.804138 | 0.026143  |
| 5 | 1.400306  | -0.713297 | -0.008000 |
| 7 | 0.998949  | 1.050888  | -0.080036 |
| 6 | -1.370423 | -1.587933 | 0.082204  |
| 1 | -1.320602 | -2.671976 | 0.129865  |
| 6 | -2.614719 | -0.951418 | 0.076418  |
| 1 | -3.521595 | -1.547449 | 0.119699  |
| 6 | -1.589010 | 1.247749  | -0.040937 |
| 1 | -1.658381 | 2.330499  | -0.088287 |
| 6 | -2.727612 | 0.441102  | 0.016096  |
| 1 | -3.711227 | 0.899310  | 0.013579  |
| 1 | 1.246385  | 1.538897  | -0.938622 |
| 1 | 1.277334  | 1.614369  | 0.720904  |
| 6 | 2.192888  | -0.977288 | 1.358787  |
| 1 | 1.690241  | -0.566222 | 2.242454  |
| 1 | 2.280771  | -2.057292 | 1.525651  |
| 1 | 3.214570  | -0.579928 | 1.330854  |
| 6 | 2.142252  | -1.099417 | -1.374150 |
| 1 | 2.225787  | -2.190117 | -1.447353 |
| 1 | 1.606629  | -0.767945 | -2.271790 |
| 1 | 3.163575  | -0.702730 | -1.419380 |

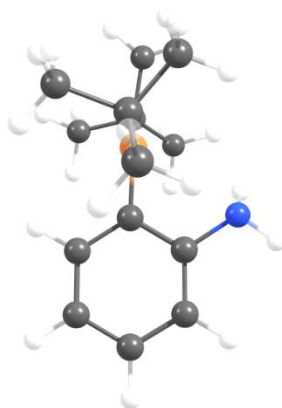

**Figure S5:** Computed structure of H/t-but (FLP)

Data for system: **H/t-but (FLP)**

```
#p m062x/6-31g(d,p) scf=(maxcycles=100) int=ultrafine nosymm freq opt
```

```
--Link1--
```

```
#p m062x/def2tzvp scf=(maxcycles=100) int=ultrafine nosymm guess=read geom=check
SCRF=(Solvent=benzene,SMD)
```

```
SCF Done: E(RM062X) = -627.5031612 A.U.
```

Zero-point correction= 0.358976 (Hartree/Particle)  
Thermal correction to Energy= 0.377220  
Thermal correction to Enthalpy= 0.378164  
Thermal correction to Gibbs Free Energy= 0.314548

Optimized Geometry (XYZ coordinates in Å)

|   |           |           |           |
|---|-----------|-----------|-----------|
| 6 | -0.844111 | 2.839728  | 0.627330  |
| 6 | 0.181060  | 2.474120  | 1.517522  |
| 5 | 1.506807  | 1.882386  | 0.882967  |
| 7 | -0.546478 | 2.770500  | -0.759932 |
| 6 | -0.096163 | 2.516491  | 2.886476  |
| 1 | 0.675379  | 2.233236  | 3.599225  |
| 6 | -1.358447 | 2.869799  | 3.365018  |
| 1 | -1.553164 | 2.876735  | 4.432349  |
| 6 | -2.106747 | 3.194988  | 1.097520  |
| 1 | -2.886089 | 3.470120  | 0.390841  |
| 6 | -2.366261 | 3.198184  | 2.465960  |
| 1 | -3.353923 | 3.469128  | 2.825223  |
| 1 | -1.356542 | 2.953875  | -1.340661 |
| 1 | 0.191212  | 3.417365  | -1.019526 |
| 6 | 1.489068  | 0.314549  | 0.564929  |
| 6 | 2.769158  | 2.868740  | 0.780131  |
| 6 | 4.017439  | 2.373717  | 0.038834  |
| 1 | 4.414696  | 1.445938  | 0.460766  |
| 1 | 3.818375  | 2.204665  | -1.023274 |
| 1 | 4.810860  | 3.128807  | 0.108559  |
| 6 | 3.164482  | 3.149287  | 2.250977  |
| 1 | 2.362644  | 3.655296  | 2.795235  |
| 1 | 3.423671  | 2.231676  | 2.792170  |
| 1 | 4.046476  | 3.801359  | 2.270361  |
| 6 | 2.361009  | 4.214249  | 0.149597  |
| 1 | 2.193299  | 4.112687  | -0.930037 |
| 1 | 1.459241  | 4.627780  | 0.613525  |
| 1 | 3.167278  | 4.947933  | 0.272852  |
| 6 | 2.316532  | -0.326175 | 1.704646  |
| 1 | 3.362573  | -0.004386 | 1.695272  |
| 1 | 1.896000  | -0.091654 | 2.690515  |
| 1 | 2.302696  | -1.417989 | 1.597597  |
| 6 | 0.074404  | -0.285504 | 0.619183  |
| 1 | 0.123444  | -1.370260 | 0.462280  |
| 1 | -0.410051 | -0.103878 | 1.582817  |
| 1 | -0.559056 | 0.145231  | -0.162163 |
| 6 | 2.101317  | -0.069977 | -0.792505 |
| 1 | 3.170894  | 0.134322  | -0.850386 |
| 1 | 1.964056  | -1.144701 | -0.965517 |
| 1 | 1.602101  | 0.461706  | -1.609921 |

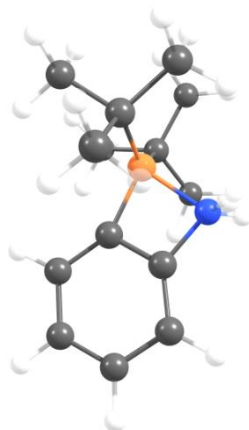

**Figure S6:** Computed structure of H/t-but (CLA)

Data for system: **H/t-but (CLA)**

```
#p m062x/6-31g(d,p) scf=(maxcycles=100) int=ultrafine nosymm freq opt
```

```
--Link1--
```

```
#p m062x/def2tzvp scf=(maxcycles=100) int=ultrafine nosymm guess=read geom=check
SCRF=(Solvent=benzene,SMD)
```

```
SCF Done: E(UM062X) = -627.502937 A.U.
Zero-point correction=          0.360281 (Hartree/Particle)
Thermal correction to Energy=    0.377515
Thermal correction to Enthalpy=  0.378459
Thermal correction to Gibbs Free Energy=  0.317911
```

Optimized Geometry (XYZ coordinates in Å)

```
6  -1.327690  2.243791  0.658377
6  -0.076712  2.679864  1.061917
5  0.656188  1.307296  0.579353
7  -1.036914  0.916215  0.113450
6  0.012250  3.945531  1.635637
1  0.961377  4.352953  1.974245
6  -1.157487  4.699387  1.777144
1  -1.107046  5.687615  2.224638
6  -2.511774  2.949032  0.773415
1  -3.467834  2.558803  0.437467
6  -2.398675  4.214317  1.355645
1  -3.284478  4.828321  1.480682
1  -1.480193  0.150324  0.617971
1  -1.233487  0.822681  -0.880918
6  1.036905  0.265156  1.784530
6  1.561050  1.494597  -0.774231
6  2.221238  0.214041  -1.302905
1  2.953692  -0.191427  -0.598508
1  1.481968  -0.570328  -1.505590
1  2.751653  0.416550  -2.243003
6  2.666975  2.520617  -0.461087
1  2.236568  3.488605  -0.182359
1  3.317452  2.195383  0.355351
1  3.300374  2.680479  -1.343542
6  0.735275  2.085282  -1.933417
1  0.049579  1.347035  -2.371487
```



|   |           |           |           |
|---|-----------|-----------|-----------|
| 1 | 0.152680  | 2.960300  | -1.624613 |
| 1 | 1.396647  | 2.400503  | -2.749892 |
| 6 | 0.977636  | -1.213592 | 1.364622  |
| 1 | -0.006247 | -1.490397 | 0.962476  |
| 1 | 1.720662  | -1.467403 | 0.607065  |
| 1 | 1.157818  | -1.862801 | 2.231392  |
| 6 | 2.450189  | 0.566781  | 2.307720  |
| 1 | 2.671529  | -0.042331 | 3.194105  |
| 1 | 3.218965  | 0.348479  | 1.560122  |
| 1 | 2.550792  | 1.619795  | 2.596997  |
| 6 | 0.077293  | 0.432845  | 2.978189  |
| 1 | -0.972013 | 0.247263  | 2.710288  |
| 1 | 0.330260  | -0.277736 | 3.775135  |
| 1 | 0.124903  | 1.442742  | 3.395641  |

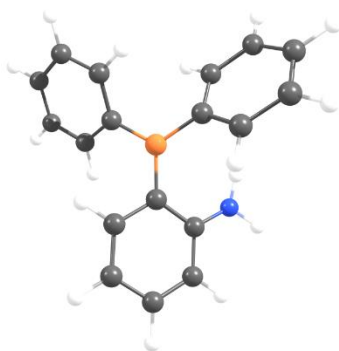

**Figure S7:** Computed structure of H/Ph (FLP)

Data for system: **H/Ph (FLP)**

```
#p m062x/6-31g(d,p) scf=(maxcycles=100) int=ultrafine nosymm freq opt
```

--Link1--

```
#p m062x/def2tzvp scf=(maxcycles=100) int=ultrafine nosymm guess=read geom=check
SCRF=(Solvent=benzene,SMD)
```

SCF Done: E(UM062X) = -775.1497291 A.U.

Zero-point correction= 0.296957 (Hartree/Particle)

Thermal correction to Energy= 0.313290

Thermal correction to Enthalpy= 0.314234

Thermal correction to Gibbs Free Energy= 0.252237

Optimized Geometry (XYZ coordinates in Å)

|   |           |           |           |
|---|-----------|-----------|-----------|
| 6 | -1.728677 | 1.377081  | 1.060551  |
| 6 | -0.396481 | 1.608938  | 0.625566  |
| 5 | 0.729680  | 0.528458  | 0.597434  |
| 7 | -2.195891 | 0.099868  | 1.323850  |
| 6 | -0.055349 | 2.926114  | 0.259813  |
| 1 | 0.957032  | 3.112735  | -0.089216 |
| 6 | -0.943459 | 3.987855  | 0.353363  |
| 1 | -0.636550 | 4.991488  | 0.081280  |
| 6 | -2.630847 | 2.451014  | 1.141010  |
| 1 | -3.650039 | 2.259542  | 1.466567  |
| 6 | -2.240548 | 3.735550  | 0.799950  |
| 1 | -2.958471 | 4.546772  | 0.877814  |
| 1 | -1.501154 | -0.594647 | 1.556371  |
| 1 | -3.021118 | 0.048204  | 1.901928  |

|   |          |           |           |
|---|----------|-----------|-----------|
| 6 | 1.787751 | 0.535677  | -0.558488 |
| 6 | 3.103075 | 0.078853  | -0.361257 |
| 6 | 1.448033 | 0.997135  | -1.843038 |
| 6 | 4.037837 | 0.090168  | -1.391347 |
| 6 | 2.369456 | 0.988102  | -2.884803 |
| 6 | 3.668600 | 0.538791  | -2.657567 |
| 1 | 3.397758 | -0.278510 | 0.621930  |
| 1 | 0.439546 | 1.360514  | -2.021401 |
| 1 | 5.051570 | -0.253312 | -1.210462 |
| 1 | 2.079052 | 1.335460  | -3.871355 |
| 1 | 4.393097 | 0.539436  | -3.466341 |
| 6 | 0.865142 | -0.529828 | 1.754841  |
| 6 | 0.519414 | -0.188880 | 3.075680  |
| 6 | 1.339414 | -1.832451 | 1.524074  |
| 6 | 0.659272 | -1.096997 | 4.119508  |
| 6 | 1.456433 | -2.755792 | 2.559652  |
| 6 | 1.123791 | -2.385666 | 3.860302  |
| 1 | 0.139155 | 0.810332  | 3.276801  |
| 1 | 1.613936 | -2.123914 | 0.513556  |
| 1 | 0.401948 | -0.805650 | 5.133083  |
| 1 | 1.812839 | -3.760387 | 2.354634  |
| 1 | 1.224737 | -3.100250 | 4.671415  |

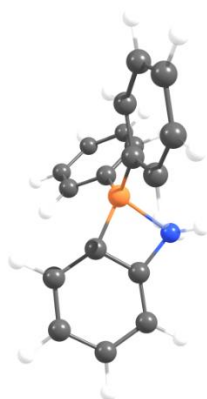

**Figure S8:** Computed structure of H/Ph (CLA)

Data for system: **H/Ph (CLA)**

```
#p m062x/6-31g(d,p) scf=(maxcycles=100) int=ultrafine nosymm freq opt
```

```
--Link1--
```

```
#p m062x/def2tzvp scf=(maxcycles=100) int=ultrafine nosymm guess=read geom=check
SCRF=(Solvent=benzene,SMD)
```

SCF Done: E(RM062X) = -775.1389427 A.U.

Zero-point correction= 0.297381 (Hartree/Particle)

Thermal correction to Energy= 0.313302

Thermal correction to Enthalpy= 0.314246

Thermal correction to Gibbs Free Energy= 0.252653

Optimized Geometry (XYZ coordinates in Å)

|   |           |          |          |
|---|-----------|----------|----------|
| 6 | -1.383449 | 1.420055 | 0.915685 |
| 6 | -0.174407 | 2.011845 | 0.590731 |
| 5 | 0.625343  | 0.601901 | 0.604597 |

|   |           |           |           |
|---|-----------|-----------|-----------|
| 7 | -1.018511 | 0.005944  | 1.010505  |
| 6 | -0.148468 | 3.394256  | 0.426001  |
| 1 | 0.767801  | 3.922738  | 0.179269  |
| 6 | -1.341056 | 4.104340  | 0.590198  |
| 1 | -1.343515 | 5.182956  | 0.464659  |
| 6 | -2.587853 | 2.077975  | 1.093234  |
| 1 | -3.510064 | 1.565938  | 1.350182  |
| 6 | -2.539826 | 3.462769  | 0.918293  |
| 1 | -3.444302 | 4.049678  | 1.039923  |
| 1 | -1.125507 | -0.404434 | 1.937211  |
| 1 | -1.450233 | -0.596274 | 0.311020  |
| 6 | 1.016170  | -0.045378 | -0.802089 |
| 6 | 1.221637  | -1.428845 | -0.928187 |
| 6 | 1.138102  | 0.728362  | -1.962246 |
| 6 | 1.535386  | -2.013654 | -2.151521 |
| 6 | 1.463972  | 0.156724  | -3.190950 |
| 6 | 1.660818  | -1.217543 | -3.288677 |
| 1 | 1.144155  | -2.058670 | -0.042615 |
| 1 | 0.968154  | 1.800927  | -1.900540 |
| 1 | 1.687460  | -3.086841 | -2.219868 |
| 1 | 1.557770  | 0.782441  | -4.073563 |
| 1 | 1.909619  | -1.667517 | -4.244891 |
| 6 | 1.557252  | 0.299273  | 1.874756  |
| 6 | 1.152239  | 0.688806  | 3.161969  |
| 6 | 2.795522  | -0.345592 | 1.765340  |
| 6 | 1.927462  | 0.429698  | 4.287305  |
| 6 | 3.587563  | -0.600750 | 2.884185  |
| 6 | 3.152886  | -0.219896 | 4.149598  |
| 1 | 0.211964  | 1.227502  | 3.284627  |
| 1 | 3.149031  | -0.650000 | 0.783851  |
| 1 | 1.584489  | 0.742095  | 5.269310  |
| 1 | 4.545281  | -1.099156 | 2.766557  |
| 1 | 3.766360  | -0.420144 | 5.022699  |

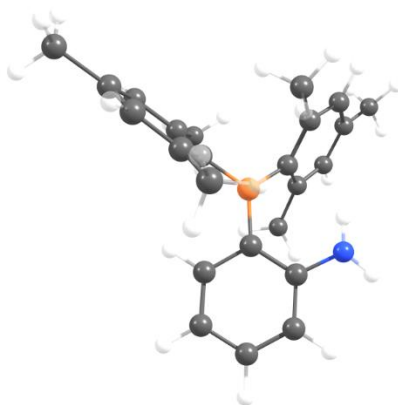

**Figure S9:** Computed structure of H/Mes (FLP)

Data for system: **H/Mes (FLP)**

```
#p m062x/6-31g(d,p) scf=(maxcycles=100) int=ultrafine nosymm freq opt
```

```
--Link1--
```

```
#p m062x/def2tzvp scf=(maxcycles=100) int=ultrafine nosymm guess=read geom=check
SCRF=(Solvent=benzene,SMD)
```

SCF Done: E(UM062X) = -1011.007741 A.U.

Zero-point correction= 0.463111 (Hartree/Particle)

Thermal correction to Energy= 0.489724  
Thermal correction to Enthalpy= 0.490668  
Thermal correction to Gibbs Free Energy= 0.405621

Optimized Geometry (XYZ coordinates in Å)

|   |           |           |           |
|---|-----------|-----------|-----------|
| 6 | -0.659076 | 2.651251  | 0.332661  |
| 6 | 0.052025  | 1.749574  | 1.169295  |
| 5 | 0.804644  | 0.478596  | 0.675960  |
| 7 | -0.857847 | 2.392860  | -1.009369 |
| 6 | 0.117271  | 2.055434  | 2.543580  |
| 1 | 0.642505  | 1.357869  | 3.192198  |
| 6 | -0.441016 | 3.201352  | 3.088141  |
| 1 | -0.354433 | 3.411608  | 4.148236  |
| 6 | -1.240002 | 3.804772  | 0.888782  |
| 1 | -1.789078 | 4.483518  | 0.241272  |
| 6 | -1.125003 | 4.076221  | 2.241456  |
| 1 | -1.578510 | 4.978506  | 2.641413  |
| 1 | -1.118987 | 3.179955  | -1.582605 |
| 1 | -0.225827 | 1.741985  | -1.453563 |
| 6 | 1.451108  | 0.373524  | -0.767472 |
| 6 | 1.202793  | -0.747222 | -1.591474 |
| 6 | 0.263178  | -1.852899 | -1.164640 |
| 1 | 0.726233  | -2.492872 | -0.406999 |
| 1 | -0.660641 | -1.460510 | -0.729465 |
| 1 | -0.008328 | -2.476246 | -2.019865 |
| 6 | 1.827171  | -0.853440 | -2.834724 |
| 1 | 1.610949  | -1.715552 | -3.462620 |
| 6 | 2.726256  | 0.109055  | -3.288152 |
| 6 | 3.432761  | -0.049573 | -4.609372 |
| 1 | 2.826355  | -0.620120 | -5.316891 |
| 1 | 3.660864  | 0.921198  | -5.056215 |
| 1 | 4.380069  | -0.583833 | -4.481306 |
| 1 | 3.667130  | 1.977177  | -2.810242 |
| 6 | 2.970242  | 1.212492  | -2.472488 |
| 6 | 2.341482  | 1.367734  | -1.237262 |
| 6 | 2.644550  | 2.617442  | -0.439693 |
| 1 | 1.827883  | 3.342349  | -0.523989 |
| 1 | 2.772164  | 2.416376  | 0.626897  |
| 1 | 3.555957  | 3.093320  | -0.809089 |
| 6 | 0.972508  | -0.738137 | 1.670111  |
| 6 | -0.158170 | -1.314524 | 2.290831  |
| 6 | -1.560547 | -0.781455 | 2.082145  |
| 1 | -1.770040 | 0.051771  | 2.760592  |
| 1 | -1.723910 | -0.403158 | 1.069652  |
| 1 | -2.296134 | -1.566607 | 2.274346  |
| 6 | -0.007477 | -2.432654 | 3.112572  |
| 1 | -0.891577 | -2.879807 | 3.563177  |
| 6 | 1.241443  | -2.990188 | 3.372342  |
| 6 | 1.390910  | -4.168807 | 4.298955  |
| 1 | 0.469125  | -4.753153 | 4.349045  |
| 1 | 2.199070  | -4.828581 | 3.973072  |
| 1 | 1.627907  | -3.836904 | 5.315338  |
| 1 | 3.341126  | -2.832628 | 2.956370  |
| 6 | 2.355633  | -2.411169 | 2.767011  |
| 6 | 2.239655  | -1.313054 | 1.916596  |
| 6 | 3.498849  | -0.768908 | 1.278485  |
| 1 | 3.560373  | -1.046030 | 0.221151  |
| 1 | 3.543387  | 0.323142  | 1.325392  |
| 1 | 4.384283  | -1.160495 | 1.784922  |

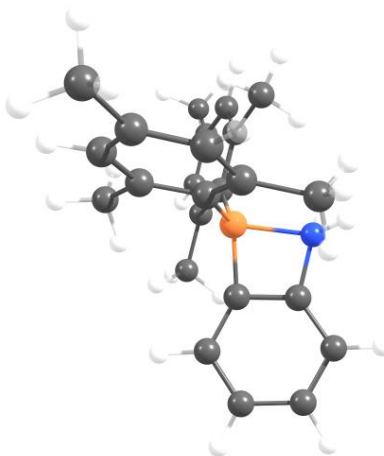

**Figure S10:** Computed structure of H/Mes (CLA)

Data for system: **H/Mes (CLA)**

```
#p m062x/6-31g(d,p) scf=(maxcycles=100) int=ultrafine nosymm freq opt
```

--Link1--

```
#p m062x/def2tzvp scf=(maxcycles=100) int=ultrafine nosymm guess=read geom=check
SCRF=(Solvent=benzene,SMD)
```

SCF Done: E(UM062X) = -1010.986287 A.U.  
 Zero-point correction= 0.465125 (Hartree/Particle)  
 Thermal correction to Energy= 0.490492  
 Thermal correction to Enthalpy= 0.491436  
 Thermal correction to Gibbs Free Energy= 0.410125

Optimized Geometry (XYZ coordinates in Å)

|   |           |           |           |
|---|-----------|-----------|-----------|
| 6 | -0.503516 | 3.111994  | 0.486365  |
| 6 | 0.105916  | 2.533482  | 1.585462  |
| 5 | 0.416331  | 1.138373  | 0.809505  |
| 7 | -0.361670 | 2.074642  | -0.532921 |
| 6 | 0.103459  | 3.248380  | 2.781062  |
| 1 | 0.549017  | 2.845933  | 3.687190  |
| 6 | -0.490307 | 4.511723  | 2.800320  |
| 1 | -0.500492 | 5.084280  | 3.722880  |
| 6 | -1.107382 | 4.358189  | 0.454658  |
| 1 | -1.573966 | 4.765010  | -0.437373 |
| 6 | -1.083876 | 5.063011  | 1.658897  |
| 1 | -1.538000 | 6.046835  | 1.713828  |
| 1 | -1.228497 | 1.792794  | -0.981210 |
| 1 | 0.336144  | 2.289477  | -1.244899 |
| 6 | 1.864972  | 0.806600  | 0.161945  |
| 6 | 1.941637  | -0.215847 | -0.814830 |
| 6 | 0.731594  | -1.022301 | -1.236767 |
| 1 | 0.456144  | -1.757130 | -0.474554 |
| 1 | -0.152867 | -0.397124 | -1.393889 |
| 1 | 0.935723  | -1.554972 | -2.168904 |
| 6 | 3.155056  | -0.529762 | -1.429649 |
| 1 | 3.179029  | -1.319863 | -2.178250 |
| 6 | 4.333243  | 0.136799  | -1.109176 |
| 6 | 5.644573  | -0.242114 | -1.747590 |

|   |           |           |           |
|---|-----------|-----------|-----------|
| 1 | 5.495782  | -0.630200 | -2.758472 |
| 1 | 6.319794  | 0.615333  | -1.805404 |
| 1 | 6.151025  | -1.021144 | -1.167894 |
| 1 | 5.162856  | 1.702621  | 0.092805  |
| 6 | 4.258152  | 1.154709  | -0.164080 |
| 6 | 3.058581  | 1.502190  | 0.463045  |
| 6 | 3.119917  | 2.639601  | 1.459131  |
| 1 | 2.521935  | 3.497381  | 1.139491  |
| 1 | 2.745238  | 2.346992  | 2.443698  |
| 1 | 4.152061  | 2.976055  | 1.582902  |
| 6 | -0.426981 | -0.108088 | 1.409962  |
| 6 | -1.761265 | -0.465386 | 1.122056  |
| 6 | -2.645770 | 0.320940  | 0.178283  |
| 1 | -2.646862 | 1.389969  | 0.418916  |
| 1 | -2.353738 | 0.186144  | -0.872044 |
| 1 | -3.679770 | -0.021996 | 0.254659  |
| 6 | -2.349020 | -1.581500 | 1.724109  |
| 1 | -3.378086 | -1.832397 | 1.473072  |
| 6 | -1.668565 | -2.371324 | 2.642970  |
| 6 | -2.304904 | -3.591927 | 3.255781  |
| 1 | -3.395449 | -3.527642 | 3.225921  |
| 1 | -2.012390 | -4.499990 | 2.717832  |
| 1 | -1.998680 | -3.716726 | 4.297795  |
| 1 | 0.172503  | -2.555256 | 3.726824  |
| 6 | -0.374595 | -1.985247 | 2.977726  |
| 6 | 0.242321  | -0.880961 | 2.389780  |
| 6 | 1.638062  | -0.538017 | 2.862994  |
| 1 | 2.401702  | -0.840318 | 2.140337  |
| 1 | 1.755663  | 0.538988  | 3.018004  |
| 1 | 1.848599  | -1.036247 | 3.812571  |

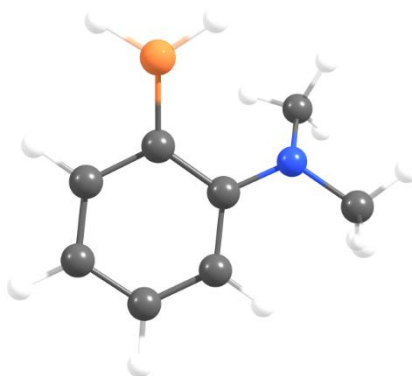

**Figure S11:** Computed structure of CH<sub>3</sub>/H (FLP)

Data for system: **CH<sub>3</sub>/H (FLP)**

```
#p m062x/6-31g(d,p) scf=(maxcycles=100) int=ultrafine nosymm freq opt
```

```
--Link1--
```

```
#p m062x/def2tzvp scf=(maxcycles=100) int=ultrafine nosymm guess=read geom=check
SCRF=(Solvent=benzene,SMD)
```

SCF Done: E(RM062X) = -391.6199788 A.U.

Zero-point correction= 0.187084 (Hartree/Particle)

Thermal correction to Energy= 0.196869

Thermal correction to Enthalpy= 0.197813

Thermal correction to Gibbs Free Energy= 0.152722

Optimized Geometry (XYZ coordinates in Å)

|   |           |           |           |
|---|-----------|-----------|-----------|
| 6 | -1.428183 | 1.821766  | 0.349318  |
| 6 | -0.118771 | 1.792103  | 0.915534  |
| 5 | 0.653316  | 0.508090  | 1.239135  |
| 7 | -1.966145 | 0.689518  | -0.245385 |
| 6 | 0.406053  | 2.994093  | 1.431059  |
| 1 | 1.412510  | 2.970512  | 1.840828  |
| 6 | -0.324571 | 4.170730  | 1.478801  |
| 1 | 0.098883  | 5.075670  | 1.899677  |
| 6 | -2.175517 | 3.012267  | 0.421796  |
| 1 | -3.174429 | 3.058806  | 0.005150  |
| 6 | -1.627847 | 4.157942  | 0.982222  |
| 1 | -2.225628 | 5.064730  | 1.008146  |
| 6 | -1.171655 | -0.124623 | -1.153750 |
| 6 | -3.380680 | 0.654493  | -0.548469 |
| 1 | -3.645357 | 1.251699  | -1.436179 |
| 1 | -3.668879 | -0.382135 | -0.740387 |
| 1 | -3.960387 | 1.013396  | 0.304121  |
| 1 | -0.136019 | 0.213759  | -1.158187 |
| 1 | -1.191213 | -1.180746 | -0.866893 |
| 1 | -1.562505 | -0.033135 | -2.177422 |
| 1 | 1.776980  | 0.594751  | 1.636916  |
| 1 | 0.148441  | -0.570513 | 1.172820  |

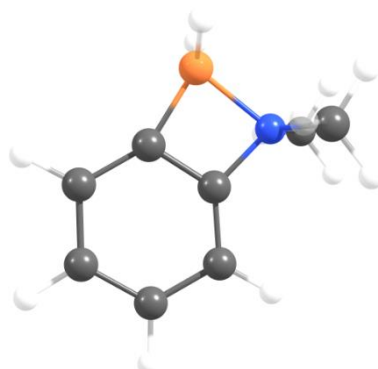

Figure S12: Computed structure of CH<sub>3</sub>/H (CLA)

Data for system: **CH<sub>3</sub>/H (CLA)**

```
#p m062x/6-31g(d,p) scf=(maxcycles=100) int=ultrafine nosymm freq opt
```

```
--Link1--
```

```
#p m062x/def2tzvp scf=(maxcycles=100) int=ultrafine nosymm guess=read geom=check  
SCRF=(Solvent=benzene,SMD)
```

```
SCF Done: E(UM062X) = -391.6319865 A.U.  
Zero-point correction=          0.188453 (Hartree/Particle)  
Thermal correction to Energy=    0.197459  
Thermal correction to Enthalpy=   0.198403  
Thermal correction to Gibbs Free Energy= 0.155212
```

Optimized Geometry (XYZ coordinates in Å)

|   |           |          |          |
|---|-----------|----------|----------|
| 6 | -1.456086 | 1.897809 | 0.573453 |
| 6 | -0.130967 | 1.880350 | 0.974608 |
| 5 | 0.027637  | 0.332841 | 0.530048 |

|   |           |           |           |
|---|-----------|-----------|-----------|
| 7 | -1.630811 | 0.525976  | 0.081476  |
| 6 | 0.390141  | 3.055399  | 1.510297  |
| 1 | 1.420073  | 3.123339  | 1.848186  |
| 6 | -0.447150 | 4.170982  | 1.610099  |
| 1 | -0.057246 | 5.095696  | 2.025459  |
| 6 | -2.328635 | 2.968673  | 0.648289  |
| 1 | -3.362009 | 2.922562  | 0.316446  |
| 6 | -1.780757 | 4.134718  | 1.189277  |
| 1 | -2.396050 | 5.023444  | 1.284619  |
| 6 | -1.906447 | 0.444025  | -1.362086 |
| 6 | -2.592143 | -0.267137 | 0.864603  |
| 1 | -3.614336 | 0.085688  | 0.690401  |
| 1 | -2.509294 | -1.315039 | 0.568568  |
| 1 | -2.341597 | -0.170248 | 1.920648  |
| 1 | -2.914073 | 0.812309  | -1.582932 |
| 1 | -1.167693 | 1.046315  | -1.890171 |
| 1 | -1.817350 | -0.596983 | -1.679898 |
| 1 | 0.655489  | 0.087448  | -0.468126 |
| 1 | 0.082969  | -0.505113 | 1.393523  |

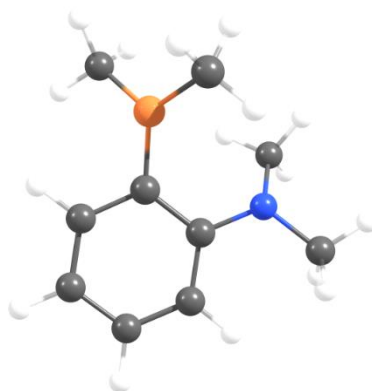

**Figure S13:** Computed structure of CH<sub>3</sub>/CH<sub>3</sub> (FLP)

Data for system: **CH<sub>3</sub>/CH<sub>3</sub> (FLP)**

```
#p m062x/6-31g(d,p) scf=(maxcycles=100) int=ultrafine nosymm freq opt
```

```
--Link1--
```

```
#p m062x/def2tzvp scf=(maxcycles=100) int=ultrafine nosymm guess=read geom=check
SCRF=(Solvent=benzene,SMD)
```

SCF Done: E(RM062X) = -470.2684034 A.U.

Zero-point correction= 0.243813 (Hartree/Particle)

Thermal correction to Energy= 0.257112

Thermal correction to Enthalpy= 0.258056

Thermal correction to Gibbs Free Energy= 0.204841

Optimized Geometry (XYZ coordinates in Å)

|   |           |          |           |
|---|-----------|----------|-----------|
| 6 | -1.282038 | 1.915645 | 0.379219  |
| 6 | 0.005620  | 1.950375 | 0.977570  |
| 5 | 0.960045  | 0.717281 | 1.115746  |
| 7 | -1.675297 | 0.794406 | -0.361883 |
| 6 | 0.377627  | 3.117497 | 1.659191  |
| 1 | 1.366755  | 3.162209 | 2.107996  |



|   |           |           |           |
|---|-----------|-----------|-----------|
| 6 | -0.487321 | 4.193925  | 1.832759  |
| 1 | -0.175236 | 5.070589  | 2.389751  |
| 6 | -2.151924 | 3.003195  | 0.547038  |
| 1 | -3.133433 | 2.995806  | 0.088033  |
| 6 | -1.758813 | 4.120223  | 1.277553  |
| 1 | -2.452474 | 4.948337  | 1.389728  |
| 6 | 0.410827  | -0.730380 | 1.426694  |
| 6 | 2.526847  | 0.896536  | 1.027419  |
| 6 | -0.767676 | 0.225862  | -1.344658 |
| 6 | -3.061754 | 0.671403  | -0.754630 |
| 1 | 2.891072  | 1.924487  | 1.090496  |
| 1 | 3.066210  | 0.274275  | 1.748831  |
| 1 | 2.822852  | 0.519844  | 0.036495  |
| 1 | 0.679580  | -0.952962 | 2.469026  |
| 1 | 0.919873  | -1.496091 | 0.829011  |
| 1 | -0.668560 | -0.847130 | 1.320414  |
| 1 | -3.343142 | 1.359495  | -1.569325 |
| 1 | -3.236031 | -0.350565 | -1.101717 |
| 1 | -3.715026 | 0.854364  | 0.101004  |
| 1 | -1.077110 | 0.497527  | -2.365429 |
| 1 | 0.244781  | 0.604903  | -1.198925 |
| 1 | -0.742428 | -0.867000 | -1.269356 |

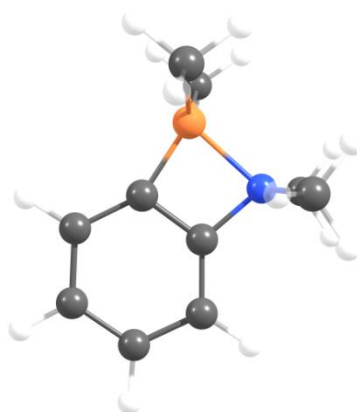

**Figure S14:** Computed structure of CH<sub>3</sub>/CH<sub>3</sub> (CLA)

Data for system: **CH<sub>3</sub>/CH<sub>3</sub> (CLA)**

```
#p m062x/6-31g(d,p) scf=(maxcycles=100) int=ultrafine nosymm freq opt
```

```
--Link1--
```

```
#p m062x/def2tzvp scf=(maxcycles=100) int=ultrafine nosymm guess=read geom=check
SCRF=(Solvent=benzene,SMD)
```

```
SCF Done: E(UM062X) = -470.2692425 A.U.
Zero-point correction=          0.244780 (Hartree/Particle)
Thermal correction to Energy=      0.257412
Thermal correction to Enthalpy=     0.258356
Thermal correction to Gibbs Free Energy=  0.207439
```

Optimized Geometry (XYZ coordinates in Å)

|   |           |          |          |
|---|-----------|----------|----------|
| 6 | -1.327164 | 1.887195 | 0.593185 |
| 6 | -0.015214 | 1.965448 | 1.029826 |
| 5 | 0.323189  | 0.435855 | 0.609652 |
| 7 | -1.426527 | 0.515799 | 0.091102 |

|   |           |           |           |
|---|-----------|-----------|-----------|
| 6 | 0.408966  | 3.173812  | 1.577653  |
| 1 | 1.423401  | 3.310572  | 1.941568  |
| 6 | -0.502088 | 4.231469  | 1.656385  |
| 1 | -0.186019 | 5.179826  | 2.081074  |
| 6 | -2.267778 | 2.901934  | 0.647974  |
| 1 | -3.287165 | 2.786926  | 0.290087  |
| 6 | -1.817936 | 4.103144  | 1.201167  |
| 1 | -2.496310 | 4.946608  | 1.279044  |
| 6 | 0.491250  | -0.654661 | 1.776169  |
| 6 | 1.255199  | 0.187163  | -0.674002 |
| 6 | -1.696882 | 0.437675  | -1.352730 |
| 6 | -2.381181 | -0.315602 | 0.840394  |
| 1 | 1.171462  | 0.942011  | -1.462706 |
| 1 | 2.300546  | 0.202291  | -0.342546 |
| 1 | 1.091194  | -0.798993 | -1.126623 |
| 1 | 1.536303  | -0.637407 | 2.108469  |
| 1 | 0.297286  | -1.676633 | 1.426561  |
| 1 | -0.118239 | -0.478453 | 2.668533  |
| 1 | -3.410892 | -0.012695 | 0.618380  |
| 1 | -2.241915 | -1.361824 | 0.557492  |
| 1 | -2.193101 | -0.203411 | 1.906877  |
| 1 | -2.728590 | 0.739458  | -1.566904 |
| 1 | -1.009965 | 1.096423  | -1.881448 |
| 1 | -1.542457 | -0.590270 | -1.689598 |

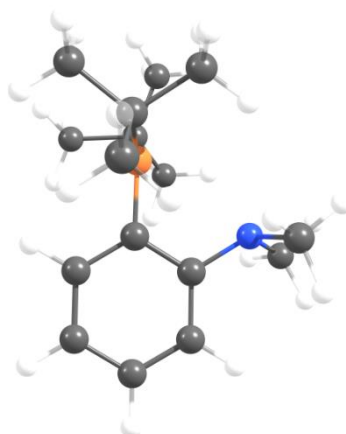

**Figure S15:** Computed structure of CH3/t-but (FLP)

Data for system: **CH3/t-but (FLP)**

```
#p m062x/6-31g(d,p) scf=(maxcycles=100) int=ultrafine nosymm freq opt
```

```
--Link1--
```

```
#p m062x/def2tzvp scf=(maxcycles=100) int=ultrafine nosymm guess=read geom=check
SCRF=(Solvent=benzene,SMD)
```

SCF Done: E(UM062X) = -706.096897326 A.U.

Zero-point correction= 0.415953 (Hartree/Particle)

Thermal correction to Energy= 0.436638

Thermal correction to Enthalpy= 0.437582

Thermal correction to Gibbs Free Energy= 0.369245

Optimized Geometry (XYZ coordinates in Å)

|   |           |           |           |
|---|-----------|-----------|-----------|
| 6 | -1.562804 | 1.877532  | 0.334317  |
| 6 | -0.359900 | 2.051486  | 1.028207  |
| 5 | 0.770504  | 0.945302  | 0.939639  |
| 7 | -1.724554 | 0.644300  | -0.403955 |
| 6 | -0.198580 | 3.224008  | 1.778937  |
| 1 | 0.720602  | 3.379769  | 2.341225  |
| 6 | -1.186897 | 4.204102  | 1.813847  |
| 1 | -1.033500 | 5.110040  | 2.391715  |
| 6 | -2.562030 | 2.851619  | 0.372809  |
| 1 | -3.489983 | 2.698259  | -0.171648 |
| 6 | -2.371660 | 4.018565  | 1.106523  |
| 1 | -3.147862 | 4.776750  | 1.131221  |
| 6 | 0.912040  | -0.081834 | 2.171320  |
| 6 | 1.808087  | 1.068286  | -0.275387 |
| 6 | -2.204513 | 0.847784  | -1.768112 |
| 6 | -2.607221 | -0.291031 | 0.289831  |
| 1 | -3.647996 | 0.072073  | 0.335688  |
| 1 | -2.599988 | -1.250859 | -0.236518 |
| 1 | -2.255699 | -0.453720 | 1.309726  |
| 1 | -3.270326 | 1.126453  | -1.812331 |
| 1 | -1.620306 | 1.631036  | -2.253418 |
| 1 | -2.080176 | -0.082570 | -2.331163 |
| 6 | 2.584907  | -0.196434 | -0.668851 |
| 1 | 3.157285  | -0.626590 | 0.156142  |
| 1 | 1.911106  | -0.969273 | -1.052321 |
| 1 | 3.297686  | 0.043515  | -1.468073 |
| 6 | 2.814315  | 2.136683  | 0.226748  |
| 1 | 2.317102  | 3.089403  | 0.438078  |
| 1 | 3.353256  | 1.821297  | 1.125256  |
| 1 | 3.559176  | 2.321823  | -0.557095 |
| 6 | 1.165807  | 1.615431  | -1.559451 |
| 1 | 1.944360  | 1.847422  | -2.297248 |
| 1 | 0.494670  | 0.873343  | -2.000405 |
| 1 | 0.592607  | 2.529145  | -1.374294 |
| 6 | 2.309575  | -0.032104 | 2.819883  |
| 1 | 2.357352  | -0.757537 | 3.641949  |
| 1 | 3.114411  | -0.272440 | 2.122195  |
| 1 | 2.517646  | 0.955807  | 3.246747  |
| 6 | 0.656505  | -1.512351 | 1.648211  |
| 1 | -0.272998 | -1.578493 | 1.072486  |
| 1 | 1.467502  | -1.865498 | 1.008586  |
| 1 | 0.574184  | -2.204308 | 2.495773  |
| 6 | -0.100177 | 0.208316  | 3.293259  |
| 1 | -1.134167 | 0.188455  | 2.937439  |
| 1 | -0.002765 | -0.537178 | 4.092067  |
| 1 | 0.062097  | 1.196797  | 3.734622  |

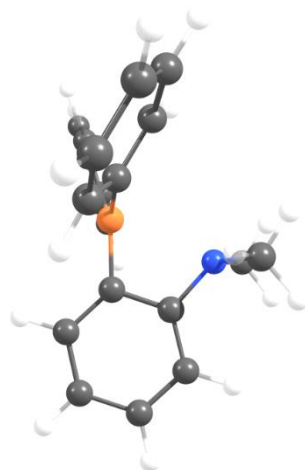

**Figure S16:** Computed structure of CH<sub>3</sub>/Ph (FLP)

Data for system: **CH<sub>3</sub>/Ph (FLP)**

```
#p m062x/6-31g(d,p) scf=(maxcycles=100) int=ultrafine nosymm freq opt
```

--Link1--

```
#p m062x/def2tzvp scf=(maxcycles=100) int=ultrafine nosymm guess=read geom=check
SCRF=(Solvent=benzene,SMD)
```

```
SCF Done: E(UM062X) = -853.7380715 A.U.
Zero-point correction=          0.352791 (Hartree/Particle)
Thermal correction to Energy=    0.372162
Thermal correction to Enthalpy=  0.373106
Thermal correction to Gibbs Free Energy=  0.303509
```

Optimized Geometry (XYZ coordinates in Å)

|   |           |           |           |
|---|-----------|-----------|-----------|
| 6 | -3.308183 | 4.455703  | -1.622921 |
| 6 | -1.915332 | 4.433810  | -1.703229 |
| 5 | -1.365918 | 3.071735  | -1.115362 |
| 7 | -3.866603 | 3.262641  | -1.026911 |
| 6 | -1.260548 | 5.528238  | -2.271102 |
| 1 | -0.177448 | 5.532405  | -2.362415 |
| 6 | -1.995667 | 6.620955  | -2.730714 |
| 1 | -1.483351 | 7.471521  | -3.169582 |
| 6 | -4.055984 | 5.535997  | -2.083235 |
| 1 | -5.140689 | 5.529747  | -2.012951 |
| 6 | -3.386766 | 6.625029  | -2.639173 |
| 1 | -3.950814 | 7.477220  | -3.004961 |
| 6 | -4.779853 | 2.542996  | -1.903776 |
| 6 | -4.445763 | 3.509952  | 0.288984  |
| 1 | -5.357014 | 4.128154  | 0.239949  |
| 1 | -4.698097 | 2.551915  | 0.753446  |
| 1 | -3.708347 | 4.013304  | 0.918801  |
| 1 | -5.709372 | 3.099166  | -2.108159 |
| 1 | -4.281622 | 2.330367  | -2.852405 |
| 1 | -5.047239 | 1.592238  | -1.433909 |
| 6 | -0.986453 | 1.909913  | -2.097698 |
| 6 | -0.170182 | 0.835240  | -1.707691 |
| 6 | -1.429863 | 1.934736  | -3.431546 |
| 6 | 0.171051  | -0.177835 | -2.598916 |
| 6 | -1.107800 | 0.919071  | -4.324855 |
| 6 | -0.306059 | -0.141497 | -3.906791 |

|   |           |           |           |
|---|-----------|-----------|-----------|
| 1 | 0.216379  | 0.803289  | -0.692966 |
| 1 | -2.032963 | 2.774261  | -3.769968 |
| 1 | 0.809463  | -0.994259 | -2.275872 |
| 1 | -1.469932 | 0.956654  | -5.347575 |
| 1 | -0.044977 | -0.932846 | -4.602963 |
| 6 | -1.148803 | 2.968432  | 0.436232  |
| 6 | -0.753471 | 4.091631  | 1.178544  |
| 6 | -1.427456 | 1.786655  | 1.142794  |
| 6 | -0.606574 | 4.032522  | 2.561912  |
| 6 | -1.309615 | 1.726491  | 2.527685  |
| 6 | -0.888487 | 2.848643  | 3.238942  |
| 1 | -0.566471 | 5.029091  | 0.659683  |
| 1 | -1.766746 | 0.910771  | 0.595072  |
| 1 | -0.287500 | 4.911427  | 3.113596  |
| 1 | -1.544863 | 0.806622  | 3.054305  |
| 1 | -0.788944 | 2.802379  | 4.319086  |

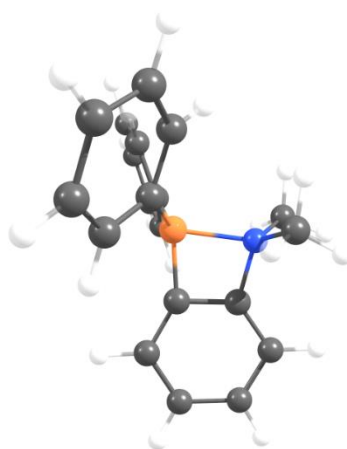

**Figure S17:** Computed structure of CH<sub>3</sub>/Ph (CLA)

Data for system: **CH<sub>3</sub>/Ph (CLA)**

#p m062x/6-31g(d,p) scf=(maxcycles=100) int=ultrafine nosymm freq opt

--Link1--

#p m062x/def2tzvp scf=(maxcycles=100) int=ultrafine nosymm guess=read geom=check  
SCRF=(Solvent=benzene,SMD)

SCF Done: E(UM062X) = -853.7417688 A.U.  
Zero-point correction= 0.354108 (Hartree/Particle)  
Thermal correction to Energy= 0.372720  
Thermal correction to Enthalpy= 0.373664  
Thermal correction to Gibbs Free Energy= 0.307163

Optimized Geometry (XYZ coordinates in Å)

|   |           |          |           |
|---|-----------|----------|-----------|
| 6 | -3.153485 | 4.710071 | -1.695838 |
| 6 | -1.795134 | 4.968014 | -1.737518 |
| 5 | -1.377866 | 3.496306 | -1.216084 |
| 7 | -3.223325 | 3.355563 | -1.145505 |
| 6 | -1.380777 | 6.208978 | -2.215033 |
| 1 | -0.328400 | 6.469078 | -2.287726 |
| 6 | -2.355102 | 7.128138 | -2.615773 |
| 1 | -2.052121 | 8.102024 | -2.988475 |
| 6 | -4.155704 | 5.582344 | -2.086722 |

|   |           |           |           |
|---|-----------|-----------|-----------|
| 1 | -5.211798 | 5.332608  | -2.039294 |
| 6 | -3.718459 | 6.823014  | -2.556785 |
| 1 | -4.445551 | 7.559965  | -2.882184 |
| 6 | -3.880912 | 2.372495  | -2.021631 |
| 6 | -3.835193 | 3.343741  | 0.196358  |
| 1 | -4.896070 | 3.608881  | 0.124683  |
| 1 | -3.734427 | 2.347374  | 0.631345  |
| 1 | -3.314783 | 4.060393  | 0.831397  |
| 1 | -4.960669 | 2.556184  | -2.059018 |
| 1 | -3.459231 | 2.438858  | -3.023125 |
| 1 | -3.694376 | 1.370733  | -1.626701 |
| 6 | -0.810810 | 2.497817  | -2.341666 |
| 6 | -0.079262 | 1.341497  | -2.034557 |
| 6 | -1.007366 | 2.773426  | -3.706421 |
| 6 | 0.401923  | 0.489397  | -3.027186 |
| 6 | -0.534980 | 1.929726  | -4.707156 |
| 6 | 0.169449  | 0.776729  | -4.368317 |
| 1 | 0.142572  | 1.109836  | -0.997432 |
| 1 | -1.538282 | 3.679988  | -3.991633 |
| 1 | 0.966905  | -0.396154 | -2.751331 |
| 1 | -0.706661 | 2.175963  | -5.750909 |
| 1 | 0.545042  | 0.116340  | -5.144019 |
| 6 | -0.824709 | 3.345435  | 0.274339  |
| 6 | -0.184057 | 4.415938  | 0.910828  |
| 6 | -0.969967 | 2.159911  | 1.014457  |
| 6 | 0.308342  | 4.309157  | 2.210554  |
| 6 | -0.495141 | 2.043815  | 2.317328  |
| 6 | 0.152686  | 3.121397  | 2.918603  |
| 1 | -0.074662 | 5.356591  | 0.375729  |
| 1 | -1.472375 | 1.306789  | 0.559431  |
| 1 | 0.806413  | 5.155863  | 2.673564  |
| 1 | -0.626483 | 1.114578  | 2.863946  |
| 1 | 0.528966  | 3.035229  | 3.933268  |

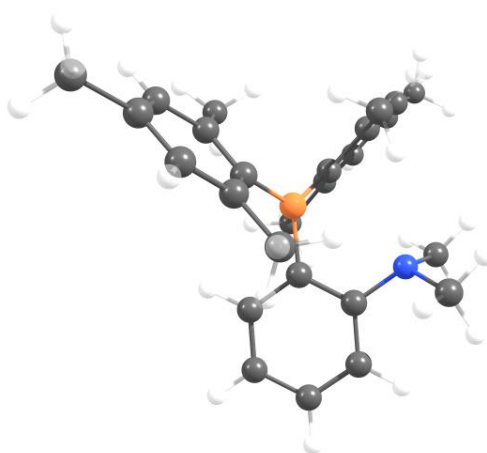

**Figure S18:** Computed structure of CH3/Mes (FLP)

Data for system: **CH3/Mes (FLP)**

#p m062x/6-31g(d,p) scf=(maxcycles=100) int=ultrafine nosymm freq opt

--Link1--

#p m062x/def2tzvp scf=(maxcycles=100) int=ultrafine nosymm guess=read geom=check  
SCRF=(Solvent=benzene,SMD)

SCF Done: E(UM062X) = -1089.59467909 A.U.  
Zero-point correction= 0.519733 (Hartree/Particle)  
Thermal correction to Energy= 0.548899  
Thermal correction to Enthalpy= 0.549844  
Thermal correction to Gibbs Free Energy= 0.459373

Optimized Geometry (XYZ coordinates in Å)

|   |           |           |           |
|---|-----------|-----------|-----------|
| 6 | -1.770754 | 1.947641  | -0.048666 |
| 6 | -0.776003 | 2.010406  | 0.940260  |
| 5 | 0.372538  | 0.930171  | 1.019948  |
| 7 | -1.771437 | 0.809013  | -0.934055 |
| 6 | -0.824361 | 3.063212  | 1.862992  |
| 1 | -0.085852 | 3.099254  | 2.661487  |
| 6 | -1.799603 | 4.053929  | 1.784042  |
| 1 | -1.814555 | 4.864261  | 2.505953  |
| 6 | -2.757655 | 2.931239  | -0.122245 |
| 1 | -3.527704 | 2.866803  | -0.886224 |
| 6 | -2.768143 | 3.986733  | 0.786410  |
| 1 | -3.540163 | 4.747289  | 0.722755  |
| 6 | -1.233961 | 1.122044  | -2.255766 |
| 6 | -3.072632 | 0.163876  | -1.054993 |
| 1 | -3.798346 | 0.746199  | -1.647585 |
| 1 | -2.940904 | -0.803150 | -1.550987 |
| 1 | -3.497226 | -0.007210 | -0.062975 |
| 1 | -1.914776 | 1.767158  | -2.837672 |
| 1 | -0.268685 | 1.620998  | -2.158514 |
| 1 | -1.079828 | 0.188846  | -2.807613 |
| 6 | 0.620429  | 0.179594  | 2.381936  |
| 6 | 1.924264  | 0.011075  | 2.907646  |
| 1 | 3.076576  | 1.532847  | 1.857749  |
| 1 | 3.358583  | -0.104001 | 1.290556  |
| 6 | 3.163317  | 0.493843  | 2.185620  |
| 1 | 4.034088  | 0.422132  | 2.841405  |
| 1 | 3.110022  | -0.730794 | 4.534041  |
| 6 | 2.102720  | -0.624403 | 4.136623  |
| 6 | 1.031456  | -1.141109 | 4.860917  |
| 6 | 1.247304  | -1.809272 | 6.193505  |
| 1 | 1.197971  | -1.077269 | 7.006597  |
| 1 | 2.227783  | -2.289211 | 6.241882  |
| 1 | 0.483077  | -2.566257 | 6.385457  |
| 6 | -0.246578 | -1.009244 | 4.322861  |
| 1 | -1.094121 | -1.432105 | 4.858557  |
| 1 | -2.517998 | -1.006901 | 3.125083  |
| 6 | -1.889697 | -0.283930 | 2.599201  |
| 1 | -1.937418 | -0.506440 | 1.529075  |
| 1 | -2.321848 | 0.711398  | 2.741586  |
| 6 | -0.468618 | -0.351625 | 3.114462  |
| 6 | 1.287626  | 0.700080  | -0.242390 |
| 6 | 1.368803  | -0.579502 | -0.830072 |
| 1 | -0.493881 | -1.487475 | -0.268105 |
| 1 | 0.863909  | -1.960904 | 0.759683  |
| 6 | 0.574228  | -1.735486 | -0.271126 |
| 1 | 0.715891  | -2.636267 | -0.873049 |
| 1 | 2.197055  | -1.764222 | -2.415418 |
| 6 | 2.151687  | -0.773364 | -1.966914 |
| 6 | 2.882456  | 0.267130  | -2.540132 |

|   |          |           |           |
|---|----------|-----------|-----------|
| 6 | 3.711914 | 0.037720  | -3.777338 |
| 1 | 3.091943 | 0.088359  | -4.678721 |
| 1 | 4.183724 | -0.948161 | -3.760124 |
| 1 | 4.496948 | 0.791438  | -3.873609 |
| 6 | 2.800965 | 1.526792  | -1.951307 |
| 1 | 3.366686 | 2.351610  | -2.380555 |
| 1 | 2.732843 | 3.786121  | -0.676957 |
| 6 | 1.923946 | 3.168053  | -0.280040 |
| 1 | 1.986274 | 3.196030  | 0.812675  |
| 1 | 0.972055 | 3.638990  | -0.549349 |
| 6 | 2.005199 | 1.760615  | -0.828425 |

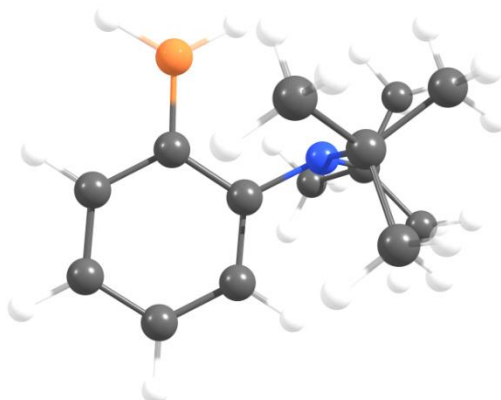

**Figure S19:** Computed structure of t-but/H (FLP)

Data for system: **t-but/H (FLP)**

```
#p m062x/6-31g(d,p) scf=(maxcycles=100) int=ultrafine nosymm freq opt
```

```
--Link1--
```

```
#p m062x/def2tzvp scf=(maxcycles=100) int=ultrafine nosymm guess=read geom=check
SCRF=(Solvent=benzene,SMD)
```

```
SCF Done: E(UM062X) = -627.4618345 A.U.
Zero-point correction=          0.357242 (Hartree/Particle)
Thermal correction to Energy=    0.374433
Thermal correction to Enthalpy=  0.375378
Thermal correction to Gibbs Free Energy=  0.314923
```

Optimized Geometry (XYZ coordinates in Å)

|   |           |           |           |
|---|-----------|-----------|-----------|
| 6 | -2.981814 | -0.609513 | -2.741512 |
| 6 | -3.213340 | -0.885669 | -1.371247 |
| 5 | -2.291438 | -0.380281 | -0.237769 |
| 7 | -1.794285 | 0.094734  | -3.129489 |
| 6 | -4.361342 | -1.620244 | -1.020782 |
| 1 | -4.528328 | -1.849099 | 0.028455  |
| 6 | -5.282808 | -2.045246 | -1.969409 |
| 1 | -6.165558 | -2.602081 | -1.672867 |
| 6 | -3.913086 | -1.045191 | -3.690336 |
| 1 | -3.742652 | -0.823856 | -4.739193 |
| 6 | -5.054569 | -1.747508 | -3.309993 |
| 1 | -5.762963 | -2.069399 | -4.067721 |
| 6 | -0.716826 | -0.809885 | -3.629352 |
| 6 | -1.988786 | 1.497443  | -3.613563 |



|   |           |           |           |
|---|-----------|-----------|-----------|
| 6 | -1.044788 | -1.509655 | -4.965723 |
| 1 | -0.189892 | -2.116868 | -5.280656 |
| 1 | -1.900631 | -2.180634 | -4.859566 |
| 1 | -1.259377 | -0.795242 | -5.763329 |
| 6 | -0.483530 | -1.913551 | -2.581291 |
| 1 | -1.354396 | -2.561746 | -2.463289 |
| 1 | 0.359156  | -2.536802 | -2.894364 |
| 1 | -0.242599 | -1.470156 | -1.609131 |
| 6 | 0.621295  | -0.077170 | -3.779969 |
| 1 | 1.392910  | -0.814611 | -4.017925 |
| 1 | 0.614981  | 0.654622  | -4.589770 |
| 1 | 0.899796  | 0.420796  | -2.848374 |
| 6 | -3.317294 | 2.039741  | -3.053249 |
| 1 | -3.338059 | 1.963511  | -1.962298 |
| 1 | -3.403503 | 3.094715  | -3.324813 |
| 1 | -4.189006 | 1.517007  | -3.450219 |
| 6 | -0.900762 | 2.431305  | -3.040342 |
| 1 | -0.760170 | 2.223374  | -1.976516 |
| 1 | 0.059646  | 2.341299  | -3.544791 |
| 1 | -1.223190 | 3.471258  | -3.150463 |
| 6 | -2.033122 | 1.651730  | -5.143889 |
| 1 | -1.090754 | 1.365796  | -5.616619 |
| 1 | -2.836097 | 1.051020  | -5.581932 |
| 1 | -2.222556 | 2.699473  | -5.399718 |
| 1 | -1.440392 | 0.431787  | -0.422802 |
| 1 | -2.470394 | -0.796581 | 0.868666  |

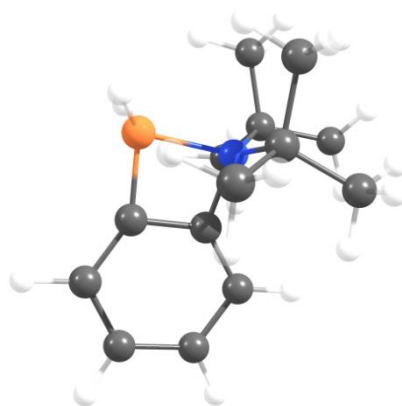

**Figure S20:** Computed structure of t-but/H (CLA)

Data for system: t-but/H (CLA)

```
#p m062x/6-31g(d,p) scf=(maxcycles=100) int=ultrafine nosymm freq opt
```

```
--Link1--
```

```
#p m062x/def2tzvp scf=(maxcycles=100) int=ultrafine nosymm guess=read geom=check
SCRF=(Solvent=benzene,SMD)
```

```
SCF Done: E(RM062X) = -627.4618345 A.U.
Zero-point correction=          0.360004 (Hartree/Particle)
Thermal correction to Energy=    0.376267
Thermal correction to Enthalpy=  0.377211
Thermal correction to Gibbs Free Energy=  0.319197
```

Optimized Geometry (XYZ coordinates in Å)

|   |           |           |           |
|---|-----------|-----------|-----------|
| 6 | -3.009435 | -0.660262 | -2.626068 |
|---|-----------|-----------|-----------|

|   |           |           |           |
|---|-----------|-----------|-----------|
| 6 | -3.316635 | -0.963173 | -1.308999 |
| 5 | -2.045406 | -0.154259 | -0.752298 |
| 7 | -1.708215 | 0.029321  | -2.488770 |
| 6 | -4.482349 | -1.676520 | -1.048325 |
| 1 | -4.772391 | -1.943680 | -0.036195 |
| 6 | -5.293941 | -2.046412 | -2.124396 |
| 1 | -6.206968 | -2.605688 | -1.942643 |
| 6 | -3.796438 | -0.985853 | -3.720898 |
| 1 | -3.553662 | -0.700787 | -4.739917 |
| 6 | -4.964419 | -1.699367 | -3.436976 |
| 1 | -5.625513 | -1.985042 | -4.248854 |
| 6 | -0.566994 | -0.898683 | -2.979213 |
| 6 | -1.731246 | 1.513697  | -2.921503 |
| 6 | -0.561592 | -1.143173 | -4.499545 |
| 1 | 0.142387  | -1.956923 | -4.694650 |
| 1 | -1.538432 | -1.476693 | -4.855418 |
| 1 | -0.233793 | -0.292673 | -5.090658 |
| 6 | -0.738526 | -2.301720 | -2.357621 |
| 1 | -1.645802 | -2.792243 | -2.715878 |
| 1 | 0.116091  | -2.902768 | -2.678194 |
| 1 | -0.754363 | -2.283384 | -1.271017 |
| 6 | 0.788605  | -0.340232 | -2.544801 |
| 1 | 1.544437  | -1.118770 | -2.678866 |
| 1 | 1.095741  | 0.513087  | -3.152845 |
| 1 | 0.776112  | -0.051451 | -1.491053 |
| 6 | -3.144846 | 2.075044  | -2.672461 |
| 1 | -3.496934 | 1.874459  | -1.661314 |
| 1 | -3.102798 | 3.157949  | -2.813778 |
| 1 | -3.869684 | 1.671140  | -3.381599 |
| 6 | -0.738221 | 2.341800  | -2.089897 |
| 1 | -0.875040 | 2.175046  | -1.021729 |
| 1 | 0.300503  | 2.144665  | -2.348285 |
| 1 | -0.925165 | 3.399355  | -2.297299 |
| 6 | -1.427846 | 1.743217  | -4.406427 |
| 1 | -0.371237 | 1.608354  | -4.644070 |
| 1 | -2.030053 | 1.102473  | -5.055675 |
| 1 | -1.680041 | 2.781626  | -4.640084 |
| 1 | -2.307855 | 0.920280  | -0.286888 |
| 1 | -1.133109 | -0.686019 | -0.182618 |

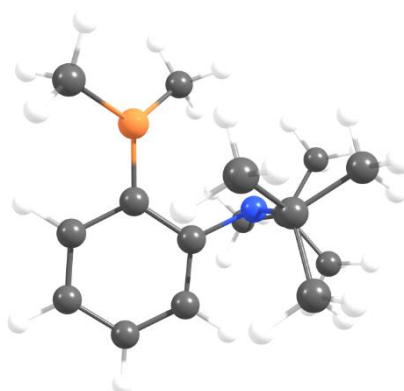

**Figure S21:** Computed structure of t-but/CH3 (FLP)

Data for system: **t-but/CH3 (FLP)**

#p m062x/6-31g(d,p) scf=(maxcycles=100) int=ultrafine nosymm freq opt

--Link1--

#p m062x/def2tzvp scf=(maxcycles=100) int=ultrafine nosymm guess=read geom=check  
SCRF=(Solvent=benzene,SMD)

SCF Done: E(UM062X) = -706.101628954 A.U.  
Zero-point correction= 0.414557 (Hartree/Particle)  
Thermal correction to Energy= 0.434978  
Thermal correction to Enthalpy= 0.435923  
Thermal correction to Gibbs Free Energy= 0.369060

Optimized Geometry (XYZ coordinates in Å)

|   |           |           |           |
|---|-----------|-----------|-----------|
| 6 | -3.024410 | -0.538635 | -2.693488 |
| 6 | -3.275314 | -0.920780 | -1.360985 |
| 5 | -2.307820 | -0.622185 | -0.155331 |
| 7 | -1.801556 | 0.158779  | -3.010859 |
| 6 | -4.448988 | -1.642939 | -1.085740 |
| 1 | -4.636996 | -1.972109 | -0.066163 |
| 6 | -5.383262 | -1.938822 | -2.070848 |
| 1 | -6.292685 | -2.476358 | -1.822060 |
| 6 | -3.947860 | -0.883838 | -3.689125 |
| 1 | -3.739689 | -0.612341 | -4.719085 |
| 6 | -5.125891 | -1.557237 | -3.383894 |
| 1 | -5.831295 | -1.796152 | -4.173830 |
| 6 | -0.723390 | -0.772958 | -3.474935 |
| 6 | -1.973821 | 1.533846  | -3.594252 |
| 6 | -1.043313 | -1.509116 | -4.792977 |
| 1 | -0.200023 | -2.152426 | -5.064370 |
| 1 | -1.922572 | -2.148247 | -4.682073 |
| 1 | -1.216913 | -0.820882 | -5.622161 |
| 6 | -0.507580 | -1.853959 | -2.399257 |
| 1 | -1.385711 | -2.488163 | -2.263520 |
| 1 | 0.326108  | -2.496264 | -2.697552 |
| 1 | -0.249824 | -1.397025 | -1.437248 |
| 6 | 0.626074  | -0.060268 | -3.625525 |
| 1 | 1.394254  | -0.813834 | -3.820329 |
| 1 | 0.647352  | 0.642450  | -4.459836 |
| 1 | 0.892637  | 0.468307  | -2.706688 |
| 6 | -3.324737 | 2.111609  | -3.127615 |
| 1 | -3.437253 | 2.025847  | -2.043715 |
| 1 | -3.361535 | 3.170529  | -3.395134 |
| 1 | -4.178215 | 1.617785  | -3.593767 |
| 6 | -0.901031 | 2.498127  | -3.041829 |
| 1 | -0.810416 | 2.384552  | -1.959967 |
| 1 | 0.080620  | 2.356014  | -3.489950 |
| 1 | -1.201396 | 3.528400  | -3.255297 |
| 6 | -1.949721 | 1.620821  | -5.132474 |
| 1 | -0.986765 | 1.324056  | -5.553467 |
| 1 | -2.730664 | 1.007775  | -5.589995 |
| 1 | -2.128582 | 2.658904  | -5.431691 |
| 6 | -1.657548 | 0.783625  | 0.129835  |
| 1 | -1.546081 | 0.969487  | 1.203449  |
| 1 | -0.642511 | 0.765394  | -0.291232 |
| 1 | -2.171776 | 1.627612  | -0.333333 |
| 6 | -2.052011 | -1.773804 | 0.896718  |
| 1 | -2.773088 | -1.630413 | 1.716119  |
| 1 | -2.198894 | -2.786244 | 0.512083  |
| 1 | -1.063338 | -1.701344 | 1.360925  |

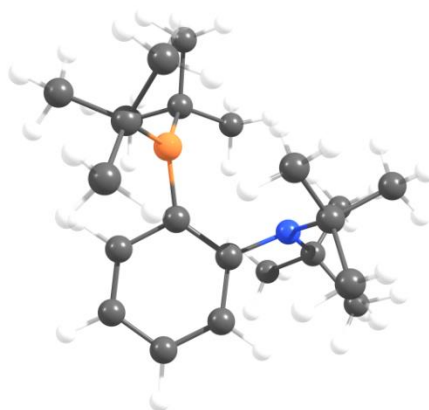

**Figure S22:** Computed structure of t-but/t-but (FLP)

Data for system: **t-but/t-but (FLP)**

```
#p m062x/6-31g(d,p) scf=(maxcycles=100) int=ultrafine nosymm freq opt
```

--Link1--

```
#p m062x/def2tzvp scf=(maxcycles=100) int=ultrafine nosymm guess=read geom=check
SCRF=(Solvent=benzene,SMD)
```

```
SCF Done: E(UM062X) = -941.917215084 A.U.
Zero-point correction=          0.588253 (Hartree/Particle)
Thermal correction to Energy=      0.615741
Thermal correction to Enthalpy=     0.616686
Thermal correction to Gibbs Free Energy=  0.536269
```

Optimized Geometry (XYZ coordinates in Å)

```
6  -3.714673   -0.862953   0.627779
6  -3.101449   -1.260293   1.843195
5  -1.812669   -2.160125   2.148447
7  -3.044731   -0.925655  -0.656050
6  -3.766310   -0.912376   3.036336
1  -3.295245   -1.165227   3.985106
6  -5.000701   -0.278747   3.074379
1  -5.455027   -0.018432   4.024828
6  -5.019209   -0.343183   0.682707
1  -5.527217   -0.136137  -0.252168
6  -5.659293   -0.037418   1.875543
1  -6.655306   0.393754   1.863014
6  -2.092023   -3.574951   2.912588
6  -0.348394   -1.510468   2.028809
6  0.877471    -2.436028   2.056758
6  -0.271588   -0.560071   3.254767
6  -0.205917   -0.629306   0.783600
6  -1.403639   -4.775322   2.223169
6  -1.521681   -3.487043   4.350638
6  -3.577515   -3.960454   3.074815
1  -0.437457   -3.360694   4.373171
1  -1.755902   -4.417540   4.882463
1  -1.474858   -5.651278   2.880027
1  -0.347140   -4.608019   2.014080
1  -1.896934   -5.038773   1.284065
1  -4.105991   -3.298747   3.764185
1  -4.131858   -3.944229   2.131898
1  -3.643752   -4.977717   3.479709
```

|   |           |           |           |
|---|-----------|-----------|-----------|
| 1 | -0.256782 | -1.218037 | -0.137611 |
| 1 | 0.758945  | -0.105023 | 0.802702  |
| 1 | 1.789475  | -1.825933 | 2.058847  |
| 1 | 0.920289  | -3.083823 | 2.934613  |
| 1 | 0.917874  | -3.070720 | 1.165102  |
| 1 | -0.301360 | -1.094174 | 4.208734  |
| 1 | 0.676012  | -0.008933 | 3.214678  |
| 1 | -1.003543 | 0.112419  | 0.735014  |
| 1 | -1.967262 | -2.667693 | 4.925531  |
| 1 | -1.084320 | 0.173271  | 3.245293  |
| 6 | -3.229735 | -2.228403 | -1.367374 |
| 6 | -3.009148 | 0.377638  | -1.421789 |
| 6 | -4.703599 | -2.553255 | -1.681568 |
| 1 | -4.776182 | -3.550395 | -2.127676 |
| 1 | -5.304066 | -2.552337 | -0.767879 |
| 1 | -5.141517 | -1.841214 | -2.384240 |
| 6 | -2.696129 | -3.336619 | -0.452611 |
| 1 | -3.312279 | -3.450155 | 0.437782  |
| 1 | -2.698698 | -4.296358 | -0.978590 |
| 1 | -1.661576 | -3.118484 | -0.155221 |
| 6 | -2.409597 | -2.345628 | -2.658875 |
| 1 | -1.344625 | -2.199138 | -2.460567 |
| 1 | -2.542022 | -3.359159 | -3.048028 |
| 1 | -2.724002 | -1.658632 | -3.444242 |
| 6 | -3.123044 | 1.578392  | -0.455510 |
| 1 | -2.491150 | 1.452656  | 0.426874  |
| 1 | -2.791403 | 2.474593  | -0.985943 |
| 1 | -4.141580 | 1.755473  | -0.110904 |
| 6 | -1.642125 | 0.567803  | -2.119052 |
| 1 | -0.829298 | 0.534011  | -1.393057 |
| 1 | -1.439859 | -0.161356 | -2.898456 |
| 1 | -1.627914 | 1.553474  | -2.594168 |
| 6 | -4.106264 | 0.563350  | -2.492396 |
| 1 | -4.001072 | 1.561642  | -2.929474 |
| 1 | -4.027733 | -0.155944 | -3.309462 |
| 1 | -5.113681 | 0.496064  | -2.076269 |

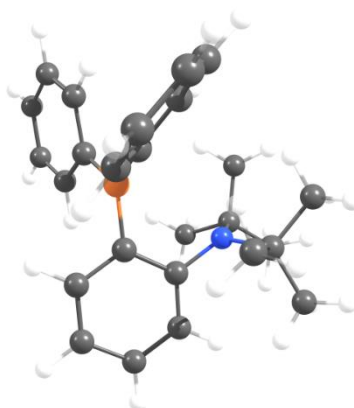

**Figure S23:** Computed structure of t-but/Ph (FLP)

Data for system: **t-but/Ph (FLP)**

```
#p m062x/6-31g(d,p) scf=(maxcycles=100) int=ultrafine nosymm freq opt
```

```
--Link1--
```

```
#p m062x/def2tzvp scf=(maxcycles=100) int=ultrafine nosymm guess=read geom=check  
SCRF=(Solvent=benzene,SMD)
```

SCF Done: E(UM062X) = -1089.57080274 A.U.  
 Zero-point correction= 0.524667 (Hartree/Particle)  
 Thermal correction to Energy= 0.550974  
 Thermal correction to Enthalpy= 0.551918  
 Thermal correction to Gibbs Free Energy= 0.469968

Optimized Geometry (XYZ coordinates in Å)

|   |           |           |           |
|---|-----------|-----------|-----------|
| 6 | -2.952359 | -0.649115 | -2.689471 |
| 6 | -3.266247 | -0.650591 | -1.316599 |
| 5 | -2.346202 | 0.070250  | -0.258512 |
| 7 | -1.768118 | 0.046958  | -3.126881 |
| 6 | -4.435153 | -1.300591 | -0.892081 |
| 1 | -4.697246 | -1.285548 | 0.164254  |
| 6 | -5.267391 | -1.963111 | -1.789481 |
| 1 | -6.156818 | -2.474663 | -1.435599 |
| 6 | -3.824584 | -1.270490 | -3.591088 |
| 1 | -3.621585 | -1.204995 | -4.654727 |
| 6 | -4.963912 | -1.936018 | -3.146904 |
| 1 | -5.623147 | -2.414839 | -3.864360 |
| 6 | -0.718367 | -0.829872 | -3.744187 |
| 6 | -1.980738 | 1.465065  | -3.590025 |
| 6 | -1.047618 | -1.394852 | -5.148327 |
| 1 | -0.146507 | -1.860281 | -5.560784 |
| 1 | -1.806784 | -2.177962 | -5.083498 |
| 1 | -1.384732 | -0.641964 | -5.859087 |
| 6 | -0.484701 | -2.054784 | -2.842476 |
| 1 | -1.411800 | -2.589665 | -2.622193 |
| 1 | 0.184624  | -2.746117 | -3.363963 |
| 1 | -0.012162 | -1.768073 | -1.903537 |
| 6 | 0.636485  | -0.107255 | -3.793849 |
| 1 | 1.399330  | -0.826944 | -4.105228 |
| 1 | 0.669279  | 0.725238  | -4.498471 |
| 1 | 0.901744  | 0.254701  | -2.796878 |
| 6 | -3.387669 | 1.958521  | -3.208487 |
| 1 | -3.544428 | 1.932011  | -2.129872 |
| 1 | -3.481093 | 2.998930  | -3.531490 |
| 1 | -4.177426 | 1.378351  | -3.690653 |
| 6 | -1.003643 | 2.407511  | -2.862279 |
| 1 | -1.144690 | 2.309580  | -1.780590 |
| 1 | 0.041468  | 2.209870  | -3.095069 |
| 1 | -1.216053 | 3.446386  | -3.135851 |
| 6 | -1.872878 | 1.672128  | -5.112333 |
| 1 | -0.896707 | 1.410339  | -5.521293 |
| 1 | -2.638087 | 1.091815  | -5.637315 |
| 1 | -2.047972 | 2.728930  | -5.336382 |
| 6 | -0.960889 | -0.566555 | 0.108879  |
| 6 | -0.925089 | -1.910953 | 0.507135  |
| 6 | 0.254724  | 0.130183  | 0.045139  |
| 6 | 0.273790  | -2.536172 | 0.836579  |
| 6 | 1.462058  | -0.500126 | 0.336052  |
| 6 | 1.472942  | -1.834389 | 0.737627  |
| 1 | -1.850632 | -2.481855 | 0.536976  |
| 1 | 0.260192  | 1.172840  | -0.264637 |
| 1 | 0.276477  | -3.576178 | 1.147784  |
| 1 | 2.394396  | 0.050211  | 0.253403  |
| 1 | 2.412728  | -2.324920 | 0.970943  |
| 6 | -2.886244 | 1.297654  | 0.554516  |
| 6 | -4.185587 | 1.800015  | 0.351052  |

|   |           |          |           |
|---|-----------|----------|-----------|
| 6 | -2.107048 | 1.910860 | 1.552632  |
| 6 | -4.678273 | 2.867339 | 1.092955  |
| 6 | -2.587623 | 2.986139 | 2.292203  |
| 6 | -3.874744 | 3.466311 | 2.061217  |
| 1 | -4.819075 | 1.336611 | -0.401055 |
| 1 | -1.112454 | 1.526893 | 1.758765  |
| 1 | -5.684634 | 3.234232 | 0.917916  |
| 1 | -1.965083 | 3.444469 | 3.054084  |
| 1 | -4.254477 | 4.302755 | 2.640290  |

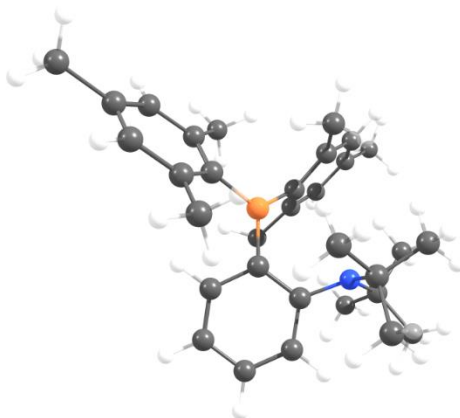

**Figure S24:** Computed structure of t-but/Mes (FLP)

Data for system: **t-but/Mes (FLP)**

```
#p m062x/6-31g(d,p) scf=(maxcycles=100) int=ultrafine nosymm freq opt
```

```
--Link1--
```

```
#p m062x/def2tzvp scf=(maxcycles=100) int=ultrafine nosymm guess=read geom=check
SCRF=(Solvent=benzene,SMD)
```

```
SCF Done: E(UM062X) = -1325.41805010 A.U.
Zero-point correction=          0.692601 (Hartree/Particle)
Thermal correction to Energy=    0.728396
Thermal correction to Enthalpy=  0.729340
Thermal correction to Gibbs Free Energy=  0.628053
```

Optimized Geometry (XYZ coordinates in Å)

|   |           |           |           |
|---|-----------|-----------|-----------|
| 6 | -3.581031 | -0.232834 | -2.594189 |
| 6 | -3.704446 | -0.552348 | -1.214339 |
| 5 | -2.743606 | -0.122474 | -0.023855 |
| 7 | -2.426078 | 0.448709  | -3.132122 |
| 6 | -4.874852 | -1.222299 | -0.802026 |
| 1 | -4.974394 | -1.479166 | 0.250290  |
| 6 | -5.901004 | -1.560799 | -1.673394 |
| 1 | -6.791590 | -2.059830 | -1.305294 |
| 6 | -4.605886 | -0.629533 | -3.467966 |
| 1 | -4.493700 | -0.409403 | -4.524915 |
| 6 | -5.758585 | -1.266298 | -3.025034 |
| 1 | -6.533920 | -1.537149 | -3.735193 |
| 6 | -1.384943 | -0.489213 | -3.662309 |
| 6 | -2.678368 | 1.763783  | -3.831525 |
| 6 | -1.785481 | -1.267373 | -4.936527 |
| 1 | -0.995268 | -1.986951 | -5.175568 |
| 1 | -2.703869 | -1.836780 | -4.771056 |

|   |           |           |           |
|---|-----------|-----------|-----------|
| 1 | -1.922386 | -0.629679 | -5.808926 |
| 6 | -1.113801 | -1.558079 | -2.598337 |
| 1 | -1.955572 | -2.243741 | -2.509728 |
| 1 | -0.232049 | -2.142336 | -2.878363 |
| 1 | -0.930229 | -1.102578 | -1.620372 |
| 6 | -0.052595 | 0.229022  | -3.911524 |
| 1 | 0.717454  | -0.521658 | -4.111489 |
| 1 | -0.079924 | 0.896980  | -4.773364 |
| 1 | 0.241581  | 0.805777  | -3.031001 |
| 6 | -4.017097 | 2.371137  | -3.380392 |
| 1 | -4.022850 | 2.508329  | -2.300750 |
| 1 | -4.112092 | 3.357992  | -3.840460 |
| 1 | -4.887126 | 1.782417  | -3.672224 |
| 6 | -1.613602 | 2.794679  | -3.396688 |
| 1 | -1.481052 | 2.750187  | -2.314860 |
| 1 | -0.647066 | 2.647751  | -3.876541 |
| 1 | -1.953188 | 3.800834  | -3.663914 |
| 6 | -2.716205 | 1.717334  | -5.371710 |
| 1 | -1.761380 | 1.428575  | -5.813589 |
| 1 | -3.490462 | 1.041939  | -5.747045 |
| 1 | -2.948320 | 2.721570  | -5.740493 |
| 6 | -2.187581 | 1.353946  | -0.028785 |
| 6 | -0.817029 | 1.660456  | 0.041504  |
| 6 | 0.243061  | 0.584433  | 0.094606  |
| 1 | 0.624374  | 0.345068  | -0.903906 |
| 1 | -0.140463 | -0.341150 | 0.533256  |
| 1 | 1.094311  | 0.914907  | 0.695875  |
| 6 | -0.401653 | 2.994839  | 0.091894  |
| 1 | 0.663439  | 3.214527  | 0.142572  |
| 6 | -1.312630 | 4.046297  | 0.094343  |
| 1 | -1.516190 | 6.106826  | 0.705974  |
| 6 | -0.851224 | 5.480231  | 0.105895  |
| 1 | 0.160440  | 5.568375  | 0.509029  |
| 1 | -0.840592 | 5.890844  | -0.909498 |
| 1 | -3.403127 | 4.538508  | 0.129482  |
| 6 | -2.673249 | 3.732552  | 0.077423  |
| 6 | -3.121741 | 2.415467  | 0.018163  |
| 6 | -4.612246 | 2.153227  | 0.123595  |
| 1 | -5.032303 | 1.720630  | -0.787615 |
| 1 | -4.839929 | 1.443007  | 0.927453  |
| 1 | -5.148243 | 3.080672  | 0.339766  |
| 6 | -2.563972 | -1.040080 | 1.269788  |
| 6 | -2.533723 | -0.459751 | 2.576080  |
| 6 | -2.557943 | 1.026923  | 2.875985  |
| 1 | -2.624645 | 1.175210  | 3.955811  |
| 1 | -3.404710 | 1.542174  | 2.422574  |
| 1 | -1.655543 | 1.530932  | 2.522853  |
| 6 | -2.485671 | -1.274203 | 3.709855  |
| 1 | -2.490732 | -0.803266 | 4.690122  |
| 6 | -2.425862 | -2.659969 | 3.636176  |
| 1 | -1.298174 | -3.621686 | 5.195844  |
| 6 | -2.339883 | -3.505634 | 4.878601  |
| 1 | -2.886649 | -3.048605 | 5.706942  |
| 1 | -2.745793 | -4.505192 | 4.706004  |
| 1 | -2.348082 | -4.312148 | 2.279358  |
| 6 | -2.413510 | -3.230184 | 2.370041  |
| 6 | -2.479594 | -2.462341 | 1.207036  |
| 6 | -2.358500 | -3.247268 | -0.079345 |
| 1 | -2.516203 | -4.310187 | 0.116181  |
| 1 | -3.069181 | -2.935471 | -0.841629 |



1 -1.352357 -3.139900 -0.496436

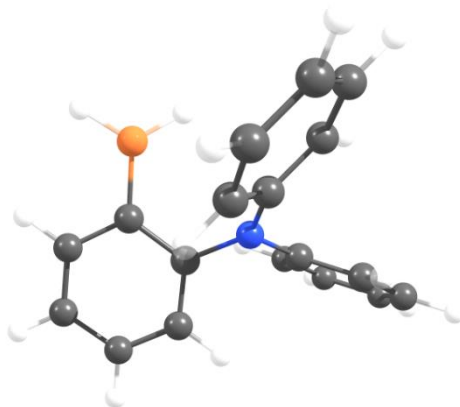

**Figure S25:** Computed structure of Ph/H (FLP)

Data for system: **Ph/H (FLP)**

```
#p m062x/6-31g(d,p) scf=(maxcycles=100) int=ultrafine nosymm freq opt
```

--Link1--

```
#p m062x/def2tzvp scf=(maxcycles=100) int=ultrafine nosymm guess=read geom=check  
SCRF=(Solvent=benzene,SMD)
```

SCF Done: E(RM062X) = -775.1003833 A.U.  
Zero-point correction= 0.292503 (Hartree/Particle)  
Thermal correction to Energy= 0.308734  
Thermal correction to Enthalpy= 0.309679  
Thermal correction to Gibbs Free Energy= 0.247692

Optimized Geometry (XYZ coordinates in Å)

|   |           |           |           |
|---|-----------|-----------|-----------|
| 6 | -2.854175 | 3.282104  | 1.875624  |
| 6 | -2.467143 | 4.430243  | 2.575550  |
| 7 | -1.988143 | 2.159669  | 1.842961  |
| 6 | -3.312137 | 5.531822  | 2.632283  |
| 1 | -2.998995 | 6.415553  | 3.179016  |
| 6 | -4.542795 | 5.513213  | 1.979676  |
| 1 | -5.196383 | 6.377975  | 2.018029  |
| 6 | -4.094254 | 3.259214  | 1.228870  |
| 1 | -4.397070 | 2.367887  | 0.689251  |
| 6 | -4.924503 | 4.373829  | 1.276060  |
| 1 | -5.883465 | 4.343597  | 0.768588  |
| 6 | -1.396208 | 1.717578  | 3.051719  |
| 6 | -0.055157 | 1.264587  | 3.070779  |
| 6 | 0.446689  | 0.765760  | 4.285698  |
| 1 | 1.468221  | 0.395446  | 4.303799  |
| 1 | 0.114186  | 0.391530  | 6.381933  |
| 6 | -0.304888 | 0.765622  | 5.454177  |
| 6 | -1.610523 | 1.251004  | 5.413824  |
| 1 | -2.219335 | 1.249981  | 6.312942  |
| 1 | -3.186930 | 2.061113  | 4.189409  |
| 6 | -2.160169 | 1.711529  | 4.222493  |
| 6 | -1.914389 | 1.357658  | 0.677229  |
| 6 | -1.843006 | -0.036736 | 0.770028  |
| 1 | -1.861131 | -0.509658 | 1.746157  |
| 6 | -1.743311 | -0.808779 | -0.383392 |
| 1 | -1.684366 | -1.888885 | -0.293830 |

|   |           |           |           |
|---|-----------|-----------|-----------|
| 1 | -1.664249 | -0.816977 | -2.536224 |
| 6 | -1.737386 | -0.211014 | -1.639791 |
| 6 | -1.826657 | 1.176795  | -1.731575 |
| 1 | -1.817106 | 1.659242  | -2.703822 |
| 1 | -1.953055 | 3.040647  | -0.659733 |
| 6 | -1.906707 | 1.959013  | -0.587165 |
| 5 | 0.917448  | 1.411158  | 1.879280  |
| 1 | -1.501488 | 4.445030  | 3.071019  |
| 1 | 0.681236  | 2.125441  | 0.957489  |
| 1 | 1.966512  | 0.842281  | 1.927633  |

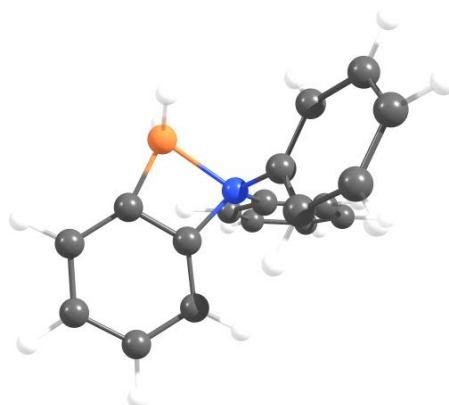

**Figure S26:** Computed structure of Ph/H (CLA)

Data for system: **Ph/H (CLA)**

```
#p m062x/6-31g(d,p) scf=(maxcycles=100) int=ultrafine nosymm freq opt
```

```
--Link1--
```

```
#p m062x/def2tzvp scf=(maxcycles=100) int=ultrafine nosymm guess=read geom=check
SCRF=(Solvent=benzene,SMD)
```

SCF Done: E(RM062X) = -775.0920741 A.U.

Zero-point correction= 0.293748 (Hartree/Particle)

Thermal correction to Energy= 0.309209

Thermal correction to Enthalpy= 0.310153

Thermal correction to Gibbs Free Energy= 0.250311

Optimized Geometry (XYZ coordinates in Å)

|   |           |           |           |
|---|-----------|-----------|-----------|
| 6 | -0.767494 | 3.445047  | 1.066653  |
| 6 | 0.489059  | 3.915571  | 1.454116  |
| 7 | -1.159501 | 2.100190  | 1.495105  |
| 6 | 0.888860  | 5.193999  | 1.090828  |
| 1 | 1.868577  | 5.549666  | 1.392110  |
| 6 | 0.043760  | 6.015025  | 0.345490  |
| 1 | 0.361333  | 7.012474  | 0.061002  |
| 6 | -1.624686 | 4.264938  | 0.337894  |
| 1 | -2.608185 | 3.914182  | 0.049499  |
| 6 | -1.210207 | 5.546612  | -0.023817 |
| 1 | -1.883214 | 6.178055  | -0.594521 |
| 6 | -1.034584 | 1.913312  | 2.951519  |
| 6 | -0.102260 | 0.900095  | 3.073738  |
| 6 | 0.255007  | 0.501665  | 4.360358  |
| 1 | 0.982491  | -0.286263 | 4.530596  |
| 1 | -0.064619 | 0.853751  | 6.457477  |

|   |           |           |           |
|---|-----------|-----------|-----------|
| 6 | -0.332849 | 1.151323  | 5.448142  |
| 6 | -1.247882 | 2.195603  | 5.274014  |
| 1 | -1.668123 | 2.690524  | 6.143371  |
| 1 | -2.302000 | 3.441360  | 3.832644  |
| 6 | -1.617038 | 2.614154  | 3.995104  |
| 6 | -2.382024 | 1.604758  | 0.877647  |
| 6 | -3.553246 | 1.413365  | 1.597177  |
| 1 | -3.581943 | 1.619674  | 2.660342  |
| 6 | -4.688169 | 0.931933  | 0.941856  |
| 1 | -5.601262 | 0.777014  | 1.507019  |
| 1 | -5.538488 | 0.280629  | -0.921687 |
| 6 | -4.653157 | 0.653619  | -0.417901 |
| 6 | -3.469232 | 0.846340  | -1.131937 |
| 1 | -3.427968 | 0.619070  | -2.191959 |
| 1 | -1.399398 | 1.451777  | -1.022163 |
| 6 | -2.333877 | 1.313274  | -0.486730 |
| 5 | 0.121020  | 0.763471  | 1.493242  |
| 1 | 1.141395  | 3.277936  | 2.039921  |
| 1 | -0.371381 | -0.163394 | 0.914845  |
| 1 | 1.106877  | 1.238805  | 1.001711  |

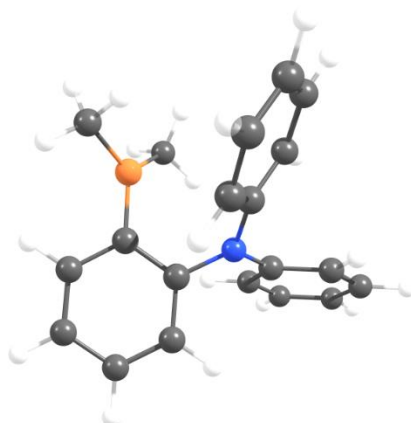

**Figure S27:** Computed structure of Ph/CH<sub>3</sub> (FLP)

Data for system: **Ph/CH<sub>3</sub> (FLP)**

```
#p m062x/6-31g(d,p) scf=(maxcycles=100) int=ultrafine nosymm freq opt
```

```
--Link1--
```

```
#p m062x/def2tzvp scf=(maxcycles=100) int=ultrafine nosymm guess=read geom=check  
SCRF=(Solvent=benzene,SMD)
```

SCF Done: E(UM062X) = -853.752893577 A.U.

Zero-point correction= 0.349397 (Hartree/Particle)

Thermal correction to Energy= 0.368979

Thermal correction to Enthalpy= 0.369923

Thermal correction to Gibbs Free Energy= 0.300563

Optimized Geometry (XYZ coordinates in Å)

|   |           |          |          |
|---|-----------|----------|----------|
| 6 | -1.476717 | 4.034539 | 1.416712 |
| 6 | -0.469311 | 4.806285 | 2.009127 |
| 7 | -1.534344 | 2.643561 | 1.653805 |
| 6 | -0.418338 | 6.177939 | 1.788683 |
| 1 | 0.368749  | 6.761228 | 2.255983 |

|   |           |           |           |
|---|-----------|-----------|-----------|
| 6 | -1.354128 | 6.799823  | 0.966552  |
| 1 | -1.306662 | 7.869080  | 0.791397  |
| 6 | -2.424893 | 4.662968  | 0.599344  |
| 1 | -3.212445 | 4.070147  | 0.145783  |
| 6 | -2.353165 | 6.031861  | 0.372468  |
| 1 | -3.095186 | 6.503248  | -0.264254 |
| 6 | -1.167764 | 2.128223  | 2.930184  |
| 6 | -0.296104 | 1.026711  | 3.008039  |
| 6 | -0.036728 | 0.496006  | 4.278122  |
| 1 | 0.612928  | -0.372327 | 4.361638  |
| 1 | -0.318971 | 0.652992  | 6.408134  |
| 6 | -0.556437 | 1.070591  | 5.435241  |
| 6 | -1.392774 | 2.178991  | 5.331935  |
| 1 | -1.817426 | 2.628719  | 6.223881  |
| 1 | -2.394567 | 3.538018  | 3.986110  |
| 6 | -1.716106 | 2.695748  | 4.081755  |
| 6 | -1.930939 | 1.743951  | 0.638191  |
| 6 | -2.673020 | 0.600354  | 0.962573  |
| 1 | -2.955014 | 0.427215  | 1.995890  |
| 6 | -3.030451 | -0.308212 | -0.027810 |
| 1 | -3.602808 | -1.189676 | 0.243516  |
| 1 | -2.951669 | -0.799342 | -2.124855 |
| 6 | -2.669784 | -0.089748 | -1.354626 |
| 6 | -1.943202 | 1.054162  | -1.681161 |
| 1 | -1.649444 | 1.236315  | -2.710074 |
| 1 | -0.987328 | 2.841831  | -0.954153 |
| 6 | -1.570343 | 1.962795  | -0.698862 |
| 5 | 0.459506  | 0.443104  | 1.755757  |
| 1 | 0.265293  | 4.321255  | 2.644162  |
| 6 | 1.292474  | 1.398867  | 0.820344  |
| 1 | 2.336379  | 1.327237  | 1.161522  |
| 1 | 1.289682  | 1.065216  | -0.222272 |
| 1 | 1.007172  | 2.453415  | 0.865475  |
| 6 | 0.482349  | -1.105809 | 1.488615  |
| 1 | 0.204306  | -1.728948 | 2.342682  |
| 1 | -0.280549 | -1.271541 | 0.711744  |
| 1 | 1.427805  | -1.457754 | 1.064955  |

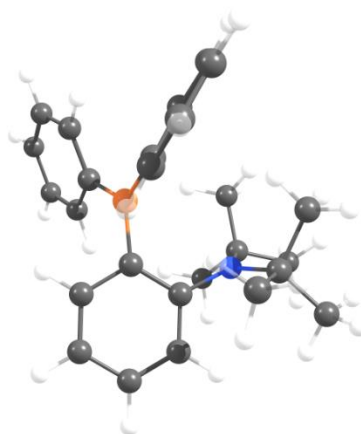

**Figure S28:** Computed structure of Ph/t-but (FLP)

Data for system: **Ph/t-but (FLP)**

```
#p m062x/6-31g(d,p) scf=(maxcycles=100) int=ultrafine nosymm freq opt
```

--Link1--

#p m062x/def2tzvp scf=(maxcycles=100) int=ultrafine nosymm guess=read geom=check  
SCRF=(Solvent=benzene,SMD)

SCF Done: E(UM062X) = -1089.57152538 A.U.  
Zero-point correction= 0.524222 (Hartree/Particle)  
Thermal correction to Energy= 0.550548  
Thermal correction to Enthalpy= 0.551492  
Thermal correction to Gibbs Free Energy= 0.470057

Optimized Geometry (XYZ coordinates in Å)

|   |           |           |           |
|---|-----------|-----------|-----------|
| 6 | -1.359647 | 3.976977  | 1.247987  |
| 6 | 0.003543  | 4.348381  | 1.192424  |
| 5 | 1.225187  | 3.365092  | 1.043524  |
| 7 | -1.776909 | 2.624296  | 1.051439  |
| 6 | 0.326805  | 5.711840  | 1.328330  |
| 1 | 1.369760  | 6.011649  | 1.252475  |
| 6 | -0.638055 | 6.682063  | 1.573172  |
| 1 | -0.350798 | 7.720990  | 1.698807  |
| 6 | -2.325465 | 4.973132  | 1.444767  |
| 1 | -3.372103 | 4.682677  | 1.442120  |
| 6 | -1.976295 | 6.305650  | 1.630505  |
| 1 | -2.749945 | 7.049948  | 1.792904  |
| 6 | 1.473506  | 2.222414  | 2.091089  |
| 6 | 1.319140  | 2.492583  | 3.458654  |
| 6 | 1.901667  | 0.933415  | 1.730296  |
| 6 | 1.555507  | 1.518488  | 4.425621  |
| 6 | 2.114156  | -0.053908 | 2.686951  |
| 6 | 1.938779  | 0.237396  | 4.039103  |
| 1 | 1.012028  | 3.489300  | 3.767840  |
| 1 | 2.053380  | 0.698010  | 0.679638  |
| 1 | 1.430916  | 1.756202  | 5.477487  |
| 1 | 2.421209  | -1.049125 | 2.380705  |
| 1 | 2.107388  | -0.530412 | 4.787744  |
| 6 | 2.307542  | 3.649812  | -0.059472 |
| 6 | 3.596802  | 3.092331  | 0.015704  |
| 6 | 2.029169  | 4.482494  | -1.159601 |
| 6 | 4.556703  | 3.344680  | -0.959067 |
| 6 | 2.977534  | 4.728943  | -2.145681 |
| 6 | 4.244896  | 4.158241  | -2.045596 |
| 1 | 3.852394  | 2.461835  | 0.862249  |
| 1 | 1.050575  | 4.948895  | -1.235481 |
| 1 | 5.547156  | 2.909065  | -0.872737 |
| 1 | 2.733589  | 5.367876  | -2.988533 |
| 1 | 4.990223  | 4.352489  | -2.810983 |
| 6 | -2.430736 | 1.916797  | 2.191108  |
| 6 | -1.785919 | 2.115626  | -0.354472 |
| 6 | -3.974054 | 1.806288  | 2.109369  |
| 1 | -4.321469 | 1.012930  | 1.448849  |
| 1 | -4.367514 | 1.587724  | 3.107389  |
| 1 | -4.416102 | 2.750219  | 1.777430  |
| 6 | -1.826675 | 0.512022  | 2.359813  |
| 1 | -1.975963 | -0.117157 | 1.480091  |
| 1 | -0.752713 | 0.583312  | 2.557589  |
| 1 | -2.304877 | 0.007638  | 3.206037  |
| 6 | -2.142431 | 2.669648  | 3.502643  |
| 1 | -2.437480 | 2.027479  | 4.337057  |
| 1 | -1.082606 | 2.896417  | 3.604576  |
| 1 | -2.707062 | 3.601282  | 3.578254  |
| 6 | -1.805267 | 3.289810  | -1.349679 |

|   |           |          |           |
|---|-----------|----------|-----------|
| 1 | -0.915415 | 3.915692 | -1.268272 |
| 1 | -1.841493 | 2.889042 | -2.366558 |
| 1 | -2.683404 | 3.922896 | -1.192830 |
| 6 | -0.540336 | 1.264291 | -0.656164 |
| 1 | -0.411076 | 0.466196 | 0.077275  |
| 1 | -0.613909 | 0.816612 | -1.653445 |
| 1 | 0.363371  | 1.882858 | -0.652155 |
| 6 | -3.033284 | 1.281686 | -0.695744 |
| 1 | -2.976453 | 1.001234 | -1.751299 |
| 1 | -3.104866 | 0.357525 | -0.121404 |
| 1 | -3.947118 | 1.862330 | -0.550903 |

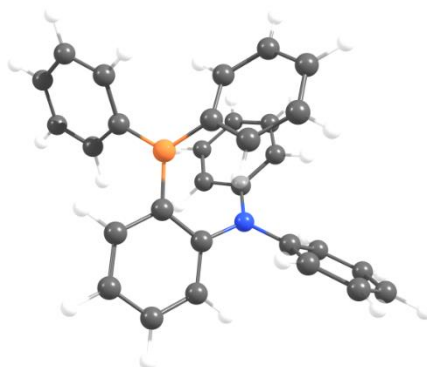

**Figure S29:** Computed structure of Ph/Ph (FLP)

Data for system: **Ph/Ph (FLP)**

#p m062x/6-31g(d,p) scf=(maxcycles=100) int=ultrafine nosymm freq opt

--Link1--

#p m062x/def2tzvp scf=(maxcycles=100) int=ultrafine nosymm guess=read geom=check  
SCRF=(Solvent=benzene,SMD)

SCF Done: E(UM062X) = -1237.22773399 A.U.  
Zero-point correction= 0.459440 (Hartree/Particle)  
Thermal correction to Energy= 0.484724  
Thermal correction to Enthalpy= 0.485668  
Thermal correction to Gibbs Free Energy= 0.402755

Optimized Geometry (XYZ coordinates in Å)

|   |           |           |          |
|---|-----------|-----------|----------|
| 6 | -1.350551 | 4.385926  | 1.530525 |
| 6 | 0.000026  | 4.657040  | 1.209602 |
| 5 | 1.071745  | 3.588770  | 0.764684 |
| 7 | -1.901694 | 3.084681  | 1.377641 |
| 6 | 0.440239  | 5.983348  | 1.353208 |
| 1 | 1.469043  | 6.214739  | 1.089686 |
| 6 | -0.379060 | 6.997183  | 1.838657 |
| 1 | 0.005629  | 8.004496  | 1.956971 |
| 6 | -2.188749 | 5.412418  | 1.980948 |
| 1 | -3.228361 | 5.187880  | 2.195722 |
| 6 | -1.701727 | 6.702161  | 2.152522 |
| 1 | -2.368335 | 7.480657  | 2.510392 |
| 6 | 1.196173  | 2.223318  | 1.517108 |
| 6 | 0.718888  | 2.081739  | 2.830197 |
| 6 | 1.697786  | 1.075975  | 0.880340 |
| 6 | 0.732756  | 0.854450  | 3.481862 |
| 6 | 1.709970  | -0.159556 | 1.521487 |

|   |           |           |           |
|---|-----------|-----------|-----------|
| 6 | 1.226349  | -0.271478 | 2.822547  |
| 1 | 0.328593  | 2.957657  | 3.341887  |
| 1 | 2.041241  | 1.147680  | -0.148287 |
| 1 | 0.352524  | 0.770728  | 4.495338  |
| 1 | 2.086137  | -1.036679 | 1.003874  |
| 1 | 1.231670  | -1.234892 | 3.323577  |
| 6 | 2.080156  | 3.971914  | -0.374427 |
| 6 | 3.397372  | 3.482682  | -0.386609 |
| 6 | 1.703920  | 4.839851  | -1.414819 |
| 6 | 4.296254  | 3.839724  | -1.387683 |
| 6 | 2.586806  | 5.182110  | -2.432577 |
| 6 | 3.888262  | 4.683068  | -2.417651 |
| 1 | 3.723761  | 2.821960  | 0.411868  |
| 1 | 0.697486  | 5.251484  | -1.419769 |
| 1 | 5.312628  | 3.459088  | -1.366721 |
| 1 | 2.267239  | 5.843423  | -3.231937 |
| 1 | 4.584240  | 4.956254  | -3.204998 |
| 6 | -2.842783 | 2.609896  | 2.325419  |
| 6 | -3.980502 | 1.908511  | 1.909217  |
| 6 | -2.652624 | 2.842602  | 3.692852  |
| 6 | -4.893078 | 1.434204  | 2.844200  |
| 6 | -3.580124 | 2.380205  | 4.618875  |
| 6 | -4.701863 | 1.667106  | 4.203696  |
| 1 | -4.137630 | 1.733707  | 0.850044  |
| 1 | -1.783551 | 3.402499  | 4.021444  |
| 1 | -5.767953 | 0.890032  | 2.502780  |
| 1 | -3.416894 | 2.572150  | 5.674663  |
| 1 | -5.419488 | 1.300965  | 4.929890  |
| 6 | -1.592169 | 2.293888  | 0.246540  |
| 6 | -1.512701 | 0.900022  | 0.360985  |
| 6 | -1.322408 | 2.891125  | -0.989762 |
| 6 | -1.164762 | 0.129113  | -0.738772 |
| 6 | -0.943990 | 2.109848  | -2.078481 |
| 6 | -0.867352 | 0.725875  | -1.963829 |
| 1 | -1.681661 | 0.435948  | 1.327618  |
| 1 | -1.401679 | 3.968602  | -1.089846 |
| 1 | -1.092226 | -0.948211 | -0.626216 |
| 1 | -0.717831 | 2.594087  | -3.023291 |
| 1 | -0.576723 | 0.119491  | -2.814789 |

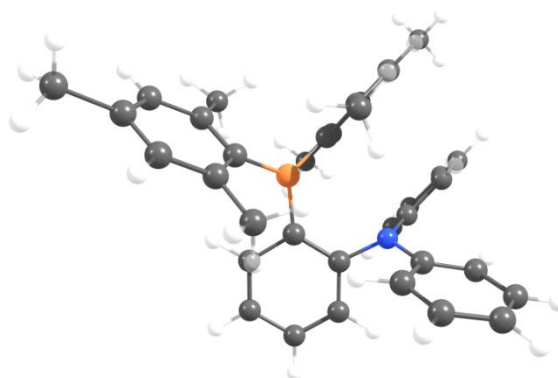

**Figure S29:** Computed structure of Ph/Mes (FLP)

Data for system: **Ph/Mes (FLP)**

#p m062x/6-31g(d,p) scf=(maxcycles=100) int=ultrafine nosymm freq opt

--Link1--

#p m062x/def2tzvp scf=(maxcycles=100) int=ultrafine nosymm guess=read geom=check  
SCRF=(Solvent=benzene,SMD)

SCF Done: E(UM062X) = -1473.07601559 A.U.  
Zero-point correction= 0.626215 (Hartree/Particle)  
Thermal correction to Energy= 0.661405  
Thermal correction to Enthalpy= 0.662350  
Thermal correction to Gibbs Free Energy= 0.559103

Optimized Geometry (XYZ coordinates in Å)

|   |           |          |           |
|---|-----------|----------|-----------|
| 6 | -1.209076 | 4.321818 | 1.404843  |
| 6 | -0.071453 | 5.128500 | 1.606858  |
| 5 | 1.432467  | 4.689666 | 1.404357  |
| 7 | -1.100693 | 2.952327 | 0.977355  |
| 6 | -0.293570 | 6.447239 | 2.050760  |
| 1 | 0.571176  | 7.078082 | 2.242574  |
| 6 | -1.567746 | 6.955876 | 2.268050  |
| 1 | -1.697288 | 7.980490 | 2.601058  |
| 6 | -2.490467 | 4.819012 | 1.662139  |
| 1 | -3.339767 | 4.155008 | 1.526736  |
| 6 | -2.674345 | 6.130042 | 2.082364  |
| 1 | -3.676732 | 6.503539 | 2.266393  |
| 6 | 1.891019  | 3.769983 | 0.210140  |
| 6 | 1.779299  | 4.176879 | -1.135679 |
| 6 | 1.201978  | 5.513804 | -1.541226 |
| 1 | 1.995379  | 6.199284 | -1.859134 |
| 1 | 0.645023  | 5.995002 | -0.733205 |
| 1 | 0.520268  | 5.387625 | -2.386698 |
| 6 | 2.253287  | 3.349980 | -2.153535 |
| 1 | 2.153868  | 3.679167 | -3.187030 |
| 6 | 2.823335  | 2.108755 | -1.886467 |
| 1 | 2.464185  | 1.010153 | -3.699762 |
| 6 | 3.290756  | 1.226458 | -3.014146 |
| 1 | 4.078388  | 1.711916 | -3.598424 |
| 1 | 3.681881  | 0.276751 | -2.642133 |
| 1 | 3.318448  | 0.718662 | -0.326736 |
| 6 | 2.903766  | 1.698140 | -0.557674 |
| 6 | 2.450614  | 2.505023 | 0.485027  |
| 6 | 2.480084  | 1.968596 | 1.896049  |
| 1 | 2.995853  | 1.006641 | 1.942674  |
| 1 | 2.983065  | 2.658069 | 2.581375  |
| 1 | 1.456899  | 1.813239 | 2.264378  |
| 6 | 2.501241  | 5.268633 | 2.425705  |
| 6 | 3.633274  | 5.980875 | 1.968195  |
| 6 | 3.870363  | 6.250097 | 0.500398  |
| 1 | 3.011694  | 6.754360 | 0.046936  |
| 1 | 4.038127  | 5.325321 | -0.057974 |
| 1 | 4.740517  | 6.896485 | 0.365855  |
| 6 | 4.552221  | 6.501852 | 2.880544  |
| 1 | 5.405402  | 7.062790 | 2.504824  |
| 6 | 4.411462  | 6.320423 | 4.252520  |
| 1 | 6.167995  | 6.069809 | 5.473192  |
| 6 | 5.439167  | 6.846861 | 5.219824  |
| 1 | 5.988940  | 7.689497 | 4.794155  |
| 1 | 4.973207  | 7.175709 | 6.152225  |
| 1 | 3.167103  | 5.457453 | 5.772233  |
| 6 | 3.299209  | 5.613106 | 4.703339  |
| 6 | 2.346039  | 5.103625 | 3.823642  |



|   |           |           |           |
|---|-----------|-----------|-----------|
| 6 | 1.179836  | 4.344320  | 4.413037  |
| 1 | 1.324157  | 4.189189  | 5.484729  |
| 1 | 0.236887  | 4.882066  | 4.271682  |
| 1 | 1.071208  | 3.359840  | 3.948378  |
| 6 | -1.687430 | 1.981176  | 1.831732  |
| 6 | -1.530568 | 2.115487  | 3.218925  |
| 6 | -2.439155 | 0.903054  | 1.346202  |
| 6 | -2.084134 | 1.185423  | 4.088777  |
| 6 | -2.980581 | -0.027768 | 2.227488  |
| 6 | -2.807016 | 0.099292  | 3.601762  |
| 1 | -0.983975 | 2.966438  | 3.607607  |
| 1 | -2.602746 | 0.792822  | 0.280979  |
| 1 | -1.944096 | 1.313186  | 5.157666  |
| 1 | -3.557678 | -0.855467 | 1.826833  |
| 1 | -3.233476 | -0.629901 | 4.281817  |
| 6 | -1.035566 | 2.702463  | -0.420443 |
| 6 | -0.452286 | 1.512041  | -0.874688 |
| 6 | -1.529523 | 3.616183  | -1.353589 |
| 6 | -0.387698 | 1.236666  | -2.231616 |
| 6 | -1.439688 | 3.340141  | -2.717283 |
| 6 | -0.876366 | 2.151550  | -3.165444 |
| 1 | -0.042065 | 0.816830  | -0.148960 |
| 1 | -1.973112 | 4.546632  | -1.015223 |
| 1 | 0.073090  | 0.310932  | -2.563595 |
| 1 | -1.824757 | 4.063592  | -3.429855 |
| 1 | -0.813978 | 1.938326  | -4.227490 |

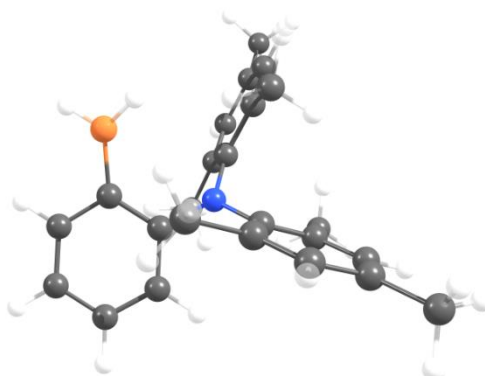

**Figure S30:** Computed structure of Mes/H (FLP)

Data for system: **Mes/H (FLP)**

```
#p m062x/6-31g(d,p) scf=(maxcycles=100) int=ultrafine nosymm freq opt
```

--Link1--

```
#p m062x/def2tzvp scf=(maxcycles=100) int=ultrafine nosymm guess=read geom=check
SCRF=(Solvent=benzene,SMD)
```

```
SCF Done: E(UM062X) = -1010.96486169 A.U.
Zero-point correction=          0.460448 (Hartree/Particle)
Thermal correction to Energy=    0.486154
Thermal correction to Enthalpy=   0.487098
Thermal correction to Gibbs Free Energy=  0.405802
```

Optimized Geometry (XYZ coordinates in Å)

|   |           |          |          |
|---|-----------|----------|----------|
| 6 | -0.041523 | 3.370428 | 0.148095 |
|---|-----------|----------|----------|

|   |           |           |           |
|---|-----------|-----------|-----------|
| 6 | 1.354894  | 3.601635  | 0.130879  |
| 5 | 2.407663  | 2.490709  | -0.056242 |
| 7 | -0.566580 | 2.149169  | -0.312744 |
| 6 | 1.812110  | 4.885189  | 0.481011  |
| 1 | 2.880777  | 5.078720  | 0.433998  |
| 6 | 0.952314  | 5.881800  | 0.924201  |
| 1 | 1.332617  | 6.855972  | 1.210989  |
| 6 | -0.912482 | 4.370665  | 0.598139  |
| 1 | -1.980924 | 4.178086  | 0.613173  |
| 6 | -0.413140 | 5.605419  | 0.993333  |
| 1 | -1.105022 | 6.371152  | 1.331580  |
| 6 | -1.753527 | 1.630912  | 0.291418  |
| 6 | -2.877443 | 1.306934  | -0.488761 |
| 6 | -1.769408 | 1.407401  | 1.685206  |
| 6 | -3.988733 | 0.741132  | 0.140552  |
| 6 | -2.911849 | 0.862792  | 2.264475  |
| 1 | -4.853286 | 0.485667  | -0.468296 |
| 1 | -2.915585 | 0.684238  | 3.337907  |
| 6 | -4.033151 | 0.514739  | 1.512104  |
| 6 | -0.009183 | 1.499066  | -1.458982 |
| 6 | 0.225830  | 0.109612  | -1.426002 |
| 6 | 0.246595  | 2.229908  | -2.638991 |
| 6 | 0.711925  | -0.517461 | -2.571344 |
| 6 | 0.762301  | 1.554274  | -3.745598 |
| 1 | 0.890285  | -1.590142 | -2.537335 |
| 1 | 0.956225  | 2.122852  | -4.652746 |
| 6 | 0.999841  | 0.183239  | -3.740294 |
| 6 | -0.047572 | 3.703128  | -2.774836 |
| 1 | -0.163146 | 3.960929  | -3.829797 |
| 1 | -0.960559 | 3.988405  | -2.246984 |
| 1 | 0.756944  | 4.318796  | -2.358872 |
| 6 | 0.000562  | -0.711447 | -0.183805 |
| 1 | -1.061773 | -0.903612 | -0.000953 |
| 1 | 0.512210  | -1.671934 | -0.274158 |
| 1 | 0.390856  | -0.195205 | 0.697667  |
| 6 | 1.571661  | -0.515423 | -4.946512 |
| 1 | 2.663955  | -0.567084 | -4.888057 |
| 1 | 1.198164  | -1.539444 | -5.024984 |
| 1 | 1.315838  | 0.013209  | -5.868041 |
| 6 | -2.931011 | 1.555060  | -1.974454 |
| 1 | -2.526607 | 2.538381  | -2.226184 |
| 1 | -2.348894 | 0.816461  | -2.535470 |
| 1 | -3.965418 | 1.511182  | -2.321816 |
| 6 | -5.256772 | -0.065615 | 2.172782  |
| 1 | -5.909862 | -0.548296 | 1.442329  |
| 1 | -4.983139 | -0.807150 | 2.928253  |
| 1 | -5.838264 | 0.713910  | 2.675857  |
| 6 | -0.580947 | 1.716927  | 2.558777  |
| 1 | -0.630508 | 1.133967  | 3.480908  |
| 1 | 0.360890  | 1.492507  | 2.050679  |
| 1 | -0.546497 | 2.778321  | 2.827367  |
| 1 | 3.525948  | 2.791675  | -0.348616 |
| 1 | 2.162448  | 1.351823  | 0.196995  |

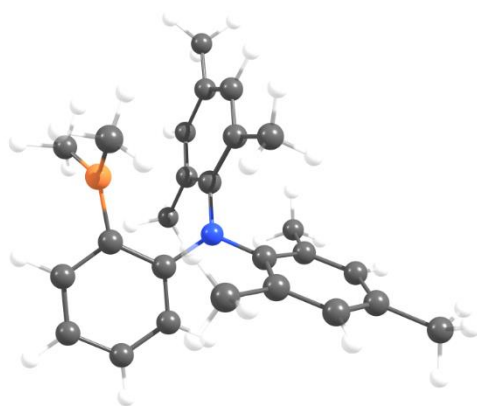

**Figure S31:** Computed structure of Mes/CH3 (FLP)

Data for system: **Mes/CH3 (FLP)**

```
#p m062x/6-31g(d,p) scf=(maxcycles=100) int=ultrafine nosymm freq opt
```

--Link1--

```
#p m062x/def2tzvp scf=(maxcycles=100) int=ultrafine nosymm guess=read geom=check
SCRF=(Solvent=benzene,SMD)
```

```
SCF Done: E(UM062X) = -1089.61559146 A.U.
Zero-point correction=          0.517552 (Hartree/Particle)
Thermal correction to Energy=    0.546581
Thermal correction to Enthalpy=  0.547525
Thermal correction to Gibbs Free Energy=  0.459174
```

Optimized Geometry (XYZ coordinates in Å)

|   |           |           |           |
|---|-----------|-----------|-----------|
| 6 | 0.413137  | 2.755851  | 0.446567  |
| 6 | 1.789870  | 2.477149  | 0.327468  |
| 5 | 2.411912  | 1.341110  | -0.573279 |
| 7 | -0.523781 | 2.063931  | -0.359289 |
| 6 | 2.676019  | 3.250547  | 1.089185  |
| 6 | 2.237740  | 4.218923  | 1.988134  |
| 1 | 2.950716  | 4.783781  | 2.579123  |
| 6 | -0.033729 | 3.751284  | 1.323615  |
| 1 | -1.096274 | 3.967060  | 1.383706  |
| 6 | 0.872306  | 4.461354  | 2.102392  |
| 1 | 0.506358  | 5.224951  | 2.781810  |
| 6 | -1.869922 | 1.898062  | 0.087541  |
| 6 | -2.121167 | 1.296814  | 1.340913  |
| 6 | -2.946654 | 2.287814  | -0.730689 |
| 6 | -3.439759 | 1.101003  | 1.741559  |
| 6 | -4.249759 | 2.045398  | -0.289681 |
| 1 | -3.623882 | 0.629292  | 2.704871  |
| 1 | -5.076041 | 2.342736  | -0.931774 |
| 6 | -4.523364 | 1.460977  | 0.941780  |
| 6 | -0.145673 | 1.627106  | -1.662428 |
| 6 | -0.456042 | 0.315034  | -2.083684 |
| 6 | 0.494469  | 2.517494  | -2.554352 |
| 6 | -0.077021 | -0.087166 | -3.362070 |
| 6 | 0.872816  | 2.050880  | -3.814585 |
| 1 | -0.312904 | -1.102042 | -3.675680 |
| 1 | 1.373116  | 2.740832  | -4.491138 |
| 6 | 0.607399  | 0.753732  | -4.239561 |
| 6 | 0.749822  | 3.966631  | -2.224506 |

|   |           |           |           |
|---|-----------|-----------|-----------|
| 1 | 0.773216  | 4.553788  | -3.145410 |
| 1 | -0.019236 | 4.377034  | -1.566836 |
| 1 | 1.704133  | 4.104788  | -1.705115 |
| 6 | -1.177825 | -0.667336 | -1.197997 |
| 1 | -2.256227 | -0.474615 | -1.177261 |
| 1 | -1.017293 | -1.684925 | -1.560978 |
| 1 | -0.827182 | -0.608226 | -0.165882 |
| 6 | 1.051917  | 0.267007  | -5.594309 |
| 1 | 2.013118  | -0.253465 | -5.527056 |
| 1 | 0.329118  | -0.433110 | -6.020801 |
| 1 | 1.175467  | 1.098585  | -6.292106 |
| 6 | -1.012418 | 0.835880  | 2.250802  |
| 1 | -0.154218 | 0.464232  | 1.685882  |
| 1 | -0.639188 | 1.655089  | 2.874396  |
| 1 | -1.372299 | 0.041347  | 2.908194  |
| 6 | -5.938198 | 1.242123  | 1.411523  |
| 1 | -6.049614 | 0.263908  | 1.887192  |
| 1 | -6.228985 | 1.998333  | 2.148087  |
| 1 | -6.644517 | 1.299124  | 0.580253  |
| 6 | -2.751666 | 2.964350  | -2.063723 |
| 1 | -3.687073 | 3.427375  | -2.384919 |
| 1 | -1.987616 | 3.742749  | -2.005513 |
| 1 | -2.434439 | 2.261004  | -2.841023 |
| 6 | 3.550651  | 1.698394  | -1.608487 |
| 1 | 4.517453  | 1.502392  | -1.121213 |
| 1 | 3.516012  | 1.045880  | -2.486644 |
| 1 | 3.560380  | 2.740381  | -1.938685 |
| 6 | 2.148457  | -0.182513 | -0.263573 |
| 1 | 1.270840  | -0.386051 | 0.352485  |
| 1 | 2.091692  | -0.784755 | -1.176166 |
| 1 | 3.024642  | -0.545073 | 0.294039  |
| 1 | 3.744815  | 3.073326  | 0.985649  |

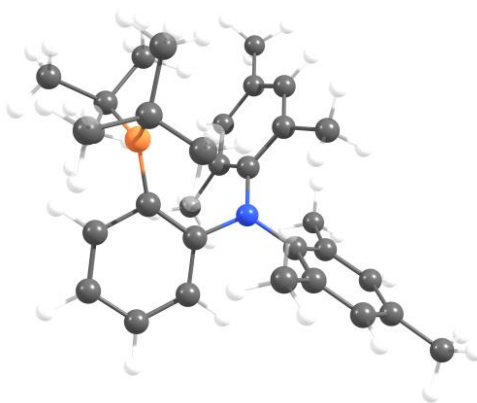

**Figure S32:** Computed structure of Mes/t-but (FLP)

Data for system: **Mes/t-but (FLP)**

```
#p m062x/6-31g(d,p) scf=(maxcycles=100) int=ultrafine nosymm freq opt
```

```
--Link1--
```

```
#p m062x/def2tzvp scf=(maxcycles=100) int=ultrafine nosymm guess=read geom=check
SCRF=(Solvent=benzene,SMD)
```

SCF Done: E(RM062X) = -1325.42559001 A.U.

Zero-point correction= 0.691633 (Hartree/Particle)

Thermal correction to Energy= 0.727697

Thermal correction to Enthalpy= 0.728641  
Thermal correction to Gibbs Free Energy= 0.626941

Optimized Geometry (XYZ coordinates in Å)

|   |           |           |           |
|---|-----------|-----------|-----------|
| 6 | 0.510098  | 2.566251  | 0.452072  |
| 6 | 1.905212  | 2.320614  | 0.352434  |
| 5 | 2.833754  | 1.199494  | -0.314592 |
| 7 | -0.451805 | 1.839784  | -0.311141 |
| 6 | 2.745559  | 3.165605  | 1.103397  |
| 1 | 3.823943  | 3.019497  | 1.030417  |
| 6 | 2.280841  | 4.165731  | 1.950191  |
| 1 | 2.977818  | 4.773633  | 2.516725  |
| 6 | 0.044964  | 3.598884  | 1.280375  |
| 1 | -1.022568 | 3.791422  | 1.318900  |
| 6 | 0.910159  | 4.375936  | 2.036725  |
| 1 | 0.509096  | 5.160705  | 2.670216  |
| 6 | -1.840979 | 1.798456  | 0.073965  |
| 6 | -2.190695 | 1.322028  | 1.363891  |
| 6 | -2.882586 | 2.170962  | -0.811149 |
| 6 | -3.527595 | 1.285970  | 1.750281  |
| 6 | -4.209320 | 2.070384  | -0.374439 |
| 1 | -3.763790 | 0.926445  | 2.749407  |
| 1 | -4.995212 | 2.355337  | -1.069883 |
| 6 | -4.564087 | 1.652706  | 0.898682  |
| 6 | -0.116359 | 1.528832  | -1.663124 |
| 6 | -0.404610 | 0.251536  | -2.172581 |
| 6 | 0.367801  | 2.545272  | -2.521209 |
| 6 | -0.134385 | -0.012407 | -3.519590 |
| 6 | 0.623272  | 2.227243  | -3.851581 |
| 1 | -0.356939 | -1.004004 | -3.908470 |
| 1 | 0.988726  | 3.010301  | -4.513334 |
| 6 | 0.394666  | 0.950975  | -4.371420 |
| 6 | 0.481577  | 3.985567  | -2.077976 |
| 1 | 0.529715  | 4.636551  | -2.954452 |
| 1 | -0.378134 | 4.281577  | -1.471212 |
| 1 | 1.362732  | 4.174242  | -1.460614 |
| 6 | -1.119896 | -0.796030 | -1.358626 |
| 1 | -2.202165 | -0.717079 | -1.517980 |
| 1 | -0.805662 | -1.799039 | -1.658056 |
| 1 | -0.954263 | -0.674830 | -0.288822 |
| 6 | 0.738420  | 0.629379  | -5.801556 |
| 1 | 1.803909  | 0.392033  | -5.895653 |
| 1 | 0.172998  | -0.232470 | -6.163216 |
| 1 | 0.532064  | 1.477428  | -6.459636 |
| 6 | -1.188596 | 0.771583  | 2.342980  |
| 1 | -0.734988 | -0.141665 | 1.950895  |
| 1 | -0.378881 | 1.467020  | 2.572025  |
| 1 | -1.690534 | 0.516008  | 3.278249  |
| 6 | -6.000583 | 1.606285  | 1.348335  |
| 1 | -6.211868 | 0.687319  | 1.902015  |
| 1 | -6.232235 | 2.446967  | 2.010474  |
| 1 | -6.683161 | 1.655578  | 0.496938  |
| 6 | -2.710277 | 2.680304  | -2.226602 |
| 1 | -3.679306 | 3.016822  | -2.600209 |
| 1 | -2.027927 | 3.526955  | -2.287633 |
| 1 | -2.337520 | 1.911552  | -2.909987 |
| 6 | 3.859032  | 1.574417  | -1.508433 |
| 6 | 2.955206  | -0.197774 | 0.482347  |
| 6 | 3.773729  | 3.026988  | -2.005552 |

|   |          |           |           |
|---|----------|-----------|-----------|
| 1 | 3.869445 | 3.759977  | -1.198965 |
| 1 | 4.582090 | 3.214110  | -2.723278 |
| 1 | 2.834491 | 3.210289  | -2.526670 |
| 6 | 5.335194 | 1.334561  | -1.127980 |
| 1 | 5.538513 | 0.305855  | -0.825531 |
| 1 | 5.968914 | 1.551025  | -1.997052 |
| 1 | 5.660618 | 1.996682  | -0.316683 |
| 6 | 3.520140 | 0.659263  | -2.714436 |
| 1 | 3.915945 | 1.109474  | -3.633738 |
| 1 | 3.965400 | -0.331481 | -2.614960 |
| 1 | 2.442458 | 0.530535  | -2.853254 |
| 6 | 1.649768 | -0.537793 | 1.200654  |
| 1 | 0.830350 | -0.651592 | 0.487634  |
| 1 | 1.747080 | -1.476367 | 1.761545  |
| 1 | 1.382700 | 0.252312  | 1.903888  |
| 6 | 3.356048 | -1.430877 | -0.342951 |
| 1 | 4.347005 | -1.346153 | -0.793600 |
| 1 | 3.371867 | -2.312780 | 0.309597  |
| 1 | 2.634716 | -1.625661 | -1.144210 |
| 6 | 4.009266 | 0.021887  | 1.597917  |
| 1 | 4.068008 | -0.889295 | 2.206584  |
| 1 | 5.010969 | 0.228294  | 1.215709  |
| 1 | 3.719841 | 0.841523  | 2.263663  |

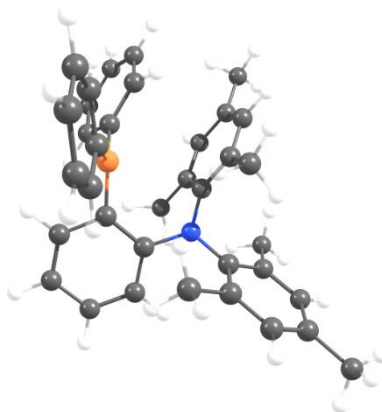

**Figure S33:** Computed structure of Mes/Ph (FLP)

Data for system: **Mes/Ph (FLP)**

```
#p m062x/6-31g(d,p) scf=(maxcycles=100) int=ultrafine nosymm freq opt
```

--Link1--

```
#p m062x/def2tzvp scf=(maxcycles=100) int=ultrafine nosymm guess=read geom=check
SCRF=(Solvent=benzene,SMD)
```

```
SCF Done: E(RM062X) = -1473.08259096 A.U.
Zero-point correction=          0.627626 (Hartree/Particle)
Thermal correction to Energy=      0.662393
Thermal correction to Enthalpy=    0.663337
Thermal correction to Gibbs Free Energy=  0.561645
```

Optimized Geometry (XYZ coordinates in Å)

|   |           |          |           |
|---|-----------|----------|-----------|
| 6 | 0.423522  | 3.084650 | 0.130350  |
| 6 | 1.773261  | 2.672224 | 0.145586  |
| 5 | 2.355338  | 1.213188 | -0.080783 |
| 7 | -0.617216 | 2.182389 | -0.201690 |

|   |           |           |           |
|---|-----------|-----------|-----------|
| 6 | 2.739038  | 3.639227  | 0.471949  |
| 1 | 3.785215  | 3.338784  | 0.511425  |
| 6 | 2.411445  | 4.955899  | 0.778590  |
| 1 | 3.188790  | 5.669651  | 1.029444  |
| 6 | 0.090956  | 4.410138  | 0.444793  |
| 1 | -0.954711 | 4.703249  | 0.421904  |
| 6 | 1.071998  | 5.334810  | 0.773012  |
| 1 | 0.788087  | 6.354887  | 1.012011  |
| 6 | -1.916780 | 2.321317  | 0.381412  |
| 6 | -2.046874 | 2.333652  | 1.788897  |
| 6 | -3.076234 | 2.401470  | -0.418781 |
| 6 | -3.312834 | 2.447581  | 2.358142  |
| 6 | -4.322444 | 2.484022  | 0.206785  |
| 1 | -3.393541 | 2.452052  | 3.443193  |
| 1 | -5.208885 | 2.539557  | -0.421380 |
| 6 | -4.470433 | 2.520705  | 1.588426  |
| 6 | -0.424497 | 1.255948  | -1.269087 |
| 6 | -0.710113 | -0.104204 | -1.057574 |
| 6 | -0.013666 | 1.707987  | -2.543642 |
| 6 | -0.628988 | -0.984188 | -2.140152 |
| 6 | 0.079477  | 0.785783  | -3.579085 |
| 1 | -0.857264 | -2.035105 | -1.975022 |
| 1 | 0.407434  | 1.132067  | -4.557170 |
| 6 | -0.237080 | -0.562261 | -3.405984 |
| 6 | 0.310043  | 3.151890  | -2.825847 |
| 1 | 0.257323  | 3.343655  | -3.899844 |
| 1 | -0.370584 | 3.834583  | -2.311948 |
| 1 | 1.318538  | 3.405128  | -2.483377 |
| 6 | -1.074366 | -0.630319 | 0.305962  |
| 1 | -2.052192 | -0.271160 | 0.642364  |
| 1 | -1.094331 | -1.722153 | 0.295932  |
| 1 | -0.336117 | -0.311617 | 1.049331  |
| 6 | -0.135358 | -1.521754 | -4.561978 |
| 1 | -0.210722 | -2.558693 | -4.225885 |
| 1 | -0.932022 | -1.346802 | -5.292320 |
| 1 | 0.819912  | -1.397391 | -5.081417 |
| 6 | -0.860367 | 2.177383  | 2.698146  |
| 1 | -0.253657 | 3.088542  | 2.746016  |
| 1 | -1.188774 | 1.930069  | 3.709942  |
| 1 | -0.208015 | 1.377904  | 2.341190  |
| 6 | -5.826729 | 2.656950  | 2.230024  |
| 1 | -5.879337 | 2.094879  | 3.166101  |
| 1 | -6.047598 | 3.703857  | 2.463529  |
| 1 | -6.616057 | 2.292495  | 1.568369  |
| 6 | -3.051654 | 2.417815  | -1.927113 |
| 1 | -4.029605 | 2.724002  | -2.304609 |
| 1 | -2.308713 | 3.120097  | -2.308855 |
| 1 | -2.814916 | 1.436313  | -2.349261 |
| 6 | 2.817303  | 0.750071  | -1.508069 |
| 6 | 2.679145  | -0.572607 | -1.960090 |
| 6 | 3.396452  | 1.675982  | -2.392775 |
| 6 | 3.097331  | -0.954285 | -3.231441 |
| 6 | 3.826170  | 1.300866  | -3.661282 |
| 6 | 3.674216  | -0.018168 | -4.085355 |
| 1 | 2.196631  | -1.307131 | -1.321565 |
| 1 | 3.514207  | 2.709748  | -2.075588 |
| 1 | 2.964431  | -1.981613 | -3.558355 |
| 1 | 4.276572  | 2.036042  | -4.321109 |
| 1 | 4.004260  | -0.313959 | -5.076707 |
| 6 | 2.687998  | 0.363946  | 1.199028  |

|   |          |           |          |
|---|----------|-----------|----------|
| 6 | 2.352272 | 0.852351  | 2.475988 |
| 6 | 3.389479 | -0.855860 | 1.148433 |
| 6 | 2.645674 | 0.142170  | 3.634938 |
| 6 | 3.688538 | -1.573392 | 2.301244 |
| 6 | 3.306029 | -1.080788 | 3.547138 |
| 1 | 1.869365 | 1.820941  | 2.554742 |
| 1 | 3.729778 | -1.237850 | 0.192345 |
| 1 | 2.368488 | 0.544711  | 4.604164 |
| 1 | 4.230067 | -2.511478 | 2.230876 |
| 1 | 3.539363 | -1.640018 | 4.448216 |

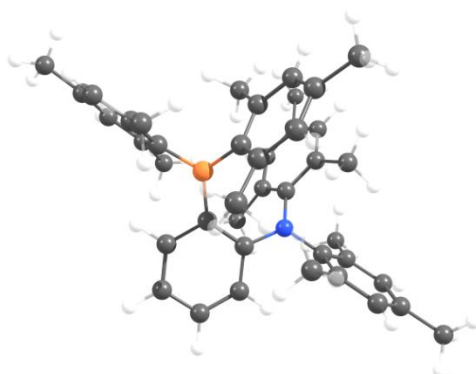

**Figure S34:** Computed structure of Mes/Mes (FLP)

Data for system: **Mes/Mes (FLP)**

```
#p m062x/6-31g(d,p) scf=(maxcycles=100) int=ultrafine nosymm freq opt
```

```
--Link1--
```

```
#p m062x/def2tzvp scf=(maxcycles=100) int=ultrafine nosymm guess=read geom=check  
SCRF=(Solvent=benzene,SMD)
```

SCF Done: E(UM062X) = -1708.93424125 A.U.

Zero-point correction= 0.795986 (Hartree/Particle)

Thermal correction to Energy= 0.839062

Thermal correction to Enthalpy= 0.840006

Thermal correction to Gibbs Free Energy= 0.721844

Optimized Geometry (XYZ coordinates in Å)

|   |           |          |           |
|---|-----------|----------|-----------|
| 6 | -0.367882 | 3.447753 | 0.633618  |
| 6 | 0.969132  | 3.545634 | 1.131173  |
| 5 | 1.938731  | 2.472379 | 1.775017  |
| 7 | -1.005140 | 2.222028 | 0.307007  |
| 6 | 1.489143  | 4.853194 | 1.274178  |
| 1 | 2.517359  | 4.950868 | 1.612897  |
| 6 | 0.753056  | 6.007879 | 1.048327  |
| 1 | 1.199238  | 6.984363 | 1.201747  |
| 6 | -1.100326 | 4.621955 | 0.393277  |
| 1 | -2.107992 | 4.531662 | 0.000776  |
| 6 | -0.562454 | 5.880179 | 0.615454  |
| 1 | -1.166702 | 6.759916 | 0.415416  |
| 6 | -2.441899 | 2.127293 | 0.339678  |
| 6 | -3.204752 | 1.701716 | -0.770642 |
| 6 | -3.106491 | 2.421052 | 1.552313  |
| 6 | -4.593084 | 1.595582 | -0.627234 |
| 6 | -4.491438 | 2.323534 | 1.628301  |
| 1 | -5.169254 | 1.264356 | -1.488100 |



|   |           |           |           |
|---|-----------|-----------|-----------|
| 1 | -4.975174 | 2.556493  | 2.574786  |
| 6 | -5.263687 | 1.907173  | 0.547589  |
| 6 | -0.291688 | 1.202928  | -0.392704 |
| 6 | -0.456609 | -0.137433 | 0.003030  |
| 6 | 0.442635  | 1.520494  | -1.554330 |
| 6 | 0.157030  | -1.136509 | -0.752290 |
| 6 | 1.064243  | 0.484105  | -2.252856 |
| 1 | 0.032349  | -2.171822 | -0.440487 |
| 1 | 1.635215  | 0.729030  | -3.146316 |
| 6 | 0.939625  | -0.850093 | -1.868971 |
| 6 | 1.428682  | 1.232059  | 2.619299  |
| 6 | 0.674718  | 1.354799  | 3.804497  |
| 6 | 1.845108  | -0.063030 | 2.225145  |
| 6 | 0.288787  | 0.209287  | 4.510745  |
| 6 | 1.440101  | -1.179520 | 2.949929  |
| 1 | -0.298677 | 0.327196  | 5.419855  |
| 1 | 1.751721  | -2.167644 | 2.614785  |
| 6 | 0.644289  | -1.066659 | 4.091390  |
| 6 | 3.526007  | 2.697799  | 1.734156  |
| 6 | 4.298654  | 2.674475  | 2.922549  |
| 6 | 4.230642  | 2.862511  | 0.517535  |
| 6 | 5.689261  | 2.776338  | 2.870170  |
| 6 | 5.623550  | 2.937436  | 0.500314  |
| 1 | 6.250177  | 2.768213  | 3.802436  |
| 1 | 6.130982  | 3.043630  | -0.456485 |
| 6 | 6.378259  | 2.887794  | 1.667058  |
| 6 | 3.675550  | 2.606365  | 4.296664  |
| 1 | 3.225882  | 1.630340  | 4.498218  |
| 1 | 4.429107  | 2.799947  | 5.063476  |
| 1 | 2.893806  | 3.362033  | 4.406390  |
| 6 | 7.882927  | 2.938203  | 1.628135  |
| 1 | 8.288624  | 3.371753  | 2.545426  |
| 1 | 8.302878  | 1.932038  | 1.525049  |
| 1 | 8.237666  | 3.530743  | 0.781143  |
| 6 | 0.481969  | 2.916285  | -2.128944 |
| 1 | 0.901892  | 2.891300  | -3.137189 |
| 1 | -0.519560 | 3.352002  | -2.181157 |
| 1 | 1.074468  | 3.607715  | -1.527821 |
| 6 | -1.304969 | -0.514492 | 1.187540  |
| 1 | -2.372064 | -0.465115 | 0.943893  |
| 1 | -1.069647 | -1.531197 | 1.509571  |
| 1 | -1.123176 | 0.161010  | 2.028140  |
| 6 | 1.652046  | -1.945051 | -2.618726 |
| 1 | 2.633207  | -2.143959 | -2.173331 |
| 1 | 1.083836  | -2.878163 | -2.593356 |
| 1 | 1.814918  | -1.670467 | -3.663806 |
| 6 | -2.645678 | 1.337035  | -2.126210 |
| 1 | -1.977628 | 2.103249  | -2.518334 |
| 1 | -2.085729 | 0.397102  | -2.105843 |
| 1 | -3.468954 | 1.224408  | -2.834580 |
| 6 | -6.760510 | 1.782661  | 0.662220  |
| 1 | -7.212783 | 1.546675  | -0.303577 |
| 1 | -7.036389 | 0.990005  | 1.364906  |
| 1 | -7.207186 | 2.711756  | 1.028074  |
| 6 | 2.754430  | -0.265730 | 1.035276  |
| 1 | 3.784841  | 0.008547  | 1.284404  |
| 1 | 2.741815  | -1.310695 | 0.714683  |
| 1 | 2.446612  | 0.340712  | 0.177466  |
| 6 | 0.351687  | 2.688587  | 4.443971  |
| 1 | 1.040059  | 2.877084  | 5.274164  |

|   |           |           |           |
|---|-----------|-----------|-----------|
| 1 | 0.428256  | 3.524208  | 3.743507  |
| 1 | -0.656865 | 2.688396  | 4.864700  |
| 6 | 0.173752  | -2.294236 | 4.826620  |
| 1 | -0.688656 | -2.741931 | 4.320514  |
| 1 | 0.958024  | -3.054662 | 4.870649  |
| 1 | -0.129882 | -2.054181 | 5.848205  |
| 6 | -2.339371 | 2.791375  | 2.785642  |
| 1 | -2.939646 | 2.603177  | 3.679293  |
| 1 | -1.428594 | 2.195168  | 2.839531  |
| 1 | -2.036704 | 3.844363  | 2.789855  |
| 6 | 3.525216  | 2.971673  | -0.809127 |
| 1 | 4.223799  | 2.811114  | -1.634201 |
| 1 | 2.719503  | 2.243112  | -0.906896 |
| 1 | 3.088240  | 3.968394  | -0.929960 |

### 3.2 Dimers

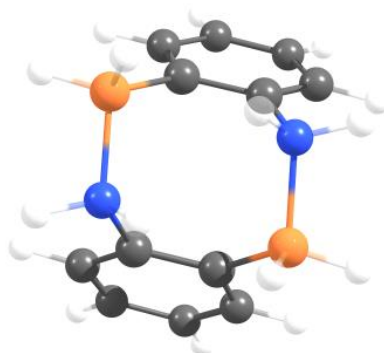

Figure S35: Computed structure of H/H

Data for system: **H/H**

```
#p m062x/6-31g(d,p) scf=(maxcycles=100) int=ultrafine nosymm freq opt
```

```
--Link1--
```

```
#p m062x/def2tzvp scf=(maxcycles=100) int=ultrafine nosymm guess=read geom=check
SCRF=(Solvent=benzene,SMD)
```

```
SCF Done: E(UM062X) = -626.13497659 A.U.
Zero-point correction=          0.269902 (Hartree/Particle)
Thermal correction to Energy=    0.282688
Thermal correction to Enthalpy=  0.283632
Thermal correction to Gibbs Free Energy=  0.231126
```

Optimized Geometry (XYZ coordinates in Å)

|   |           |          |           |
|---|-----------|----------|-----------|
| 6 | 2.416689  | 4.664761 | 2.281061  |
| 6 | 1.092378  | 5.081255 | 2.115991  |
| 5 | -0.017745 | 4.904600 | 3.268036  |
| 7 | 2.746374  | 4.003578 | 3.539122  |
| 6 | 0.798083  | 5.672711 | 0.882367  |
| 1 | -0.218059 | 6.013443 | 0.704840  |
| 6 | 1.759999  | 5.833351 | -0.113208 |
| 1 | 1.492571  | 6.298573 | -1.056686 |
| 6 | 3.397393  | 4.791897 | 1.308186  |

|   |           |           |           |
|---|-----------|-----------|-----------|
| 1 | 4.404603  | 4.425078  | 1.489311  |
| 6 | 3.061757  | 5.388501  | 0.096206  |
| 1 | 3.814163  | 5.501132  | -0.677325 |
| 1 | 3.723082  | 4.164433  | 3.778740  |
| 1 | 0.321997  | 5.367376  | 4.344363  |
| 1 | -1.099857 | 5.306171  | 2.918559  |
| 1 | 2.186587  | 4.452783  | 4.267996  |
| 6 | -0.512574 | 1.132805  | 0.569821  |
| 6 | 0.791234  | 0.653957  | 0.485932  |
| 1 | 1.070274  | -0.016510 | -0.320721 |
| 1 | -1.255043 | 0.842746  | -0.166220 |
| 6 | -0.863295 | 1.993103  | 1.606307  |
| 6 | 1.740225  | 1.042254  | 1.429867  |
| 1 | 2.758189  | 0.671576  | 1.349243  |
| 6 | 1.430430  | 1.902207  | 2.489395  |
| 6 | 0.104683  | 2.343414  | 2.536251  |
| 1 | -1.872404 | 2.389818  | 1.684617  |
| 7 | -0.240637 | 3.276472  | 3.603467  |
| 5 | 2.525587  | 2.340914  | 3.584240  |
| 1 | 3.611816  | 1.872069  | 3.350363  |
| 1 | 2.171677  | 2.137600  | 4.733710  |
| 1 | 0.308975  | 3.008178  | 4.423485  |
| 1 | -1.220512 | 3.173020  | 3.861192  |

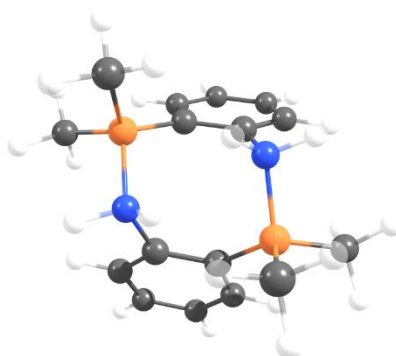

**Figure S36:** Computed structure of H/CH3

Data for system: **H/CH3**

```
#p m062x/6-31g(d,p) scf=(maxcycles=100) int=ultrafine nosymm freq opt
```

```
--Link1--
```

```
#p m062x/def2tzvp scf=(maxcycles=100) int=ultrafine nosymm guess=read geom=check  
SCRF=(Solvent=benzene,SMD)
```

```
SCF Done: E(UM062X) = -783.40407236 A.U.  
Zero-point correction=          0.383372 (Hartree/Particle)  
Thermal correction to Energy=      0.402670  
Thermal correction to Enthalpy=     0.403614  
Thermal correction to Gibbs Free Energy=  0.338625
```

Optimized Geometry (XYZ coordinates in Å)

|   |           |          |           |
|---|-----------|----------|-----------|
| 6 | 2.371446  | 4.655488 | 1.749933  |
| 6 | 1.057978  | 5.061601 | 1.486206  |
| 5 | -0.196772 | 4.865531 | 2.508180  |
| 7 | 2.635361  | 3.917336 | 2.982165  |
| 6 | 0.884197  | 5.729756 | 0.265922  |
| 1 | -0.110746 | 6.070326 | -0.003078 |

|   |           |           |           |
|---|-----------|-----------|-----------|
| 6 | 1.932927  | 5.976468  | -0.617141 |
| 1 | 1.744016  | 6.500414  | -1.548769 |
| 6 | 3.440493  | 4.878371  | 0.890320  |
| 1 | 4.435461  | 4.531371  | 1.156985  |
| 6 | 3.218996  | 5.549053  | -0.307303 |
| 1 | 4.044704  | 5.733805  | -0.986259 |
| 1 | 3.578978  | 4.125852  | 3.310566  |
| 1 | 2.009299  | 4.276822  | 3.703490  |
| 6 | -0.671882 | 0.859046  | 0.162679  |
| 6 | 0.626421  | 0.378690  | 0.034700  |
| 1 | 0.861956  | -0.353360 | -0.731318 |
| 1 | -1.460884 | 0.509721  | -0.494846 |
| 6 | -0.953507 | 1.797636  | 1.149057  |
| 6 | 1.627600  | 0.838734  | 0.886989  |
| 1 | 2.633524  | 0.450423  | 0.762092  |
| 6 | 1.392369  | 1.780663  | 1.898469  |
| 6 | 0.069135  | 2.229308  | 1.985278  |
| 1 | -1.959293 | 2.191558  | 1.270237  |
| 7 | -0.255677 | 3.242197  | 2.986002  |
| 5 | 2.590838  | 2.226874  | 2.909264  |
| 1 | 0.329225  | 3.072950  | 3.804950  |
| 1 | -1.216536 | 3.112627  | 3.304916  |
| 6 | -1.630402 | 5.133322  | 1.806414  |
| 1 | -1.769835 | 4.590312  | 0.863732  |
| 1 | -2.467631 | 4.868952  | 2.468652  |
| 1 | -1.757188 | 6.198387  | 1.581287  |
| 6 | -0.065879 | 5.700119  | 3.902484  |
| 1 | -0.912297 | 5.501287  | 4.573825  |
| 1 | 0.842379  | 5.550505  | 4.507290  |
| 1 | -0.093444 | 6.771732  | 3.678787  |
| 6 | 4.058691  | 1.805721  | 2.372600  |
| 1 | 4.860639  | 2.227283  | 2.995983  |
| 1 | 4.189622  | 0.718614  | 2.418895  |
| 1 | 4.253323  | 2.105554  | 1.335701  |
| 6 | 2.378384  | 1.753777  | 4.454915  |
| 1 | 1.439420  | 2.039330  | 4.954947  |
| 1 | 2.410811  | 0.660104  | 4.499389  |
| 1 | 3.188119  | 2.115086  | 5.103315  |

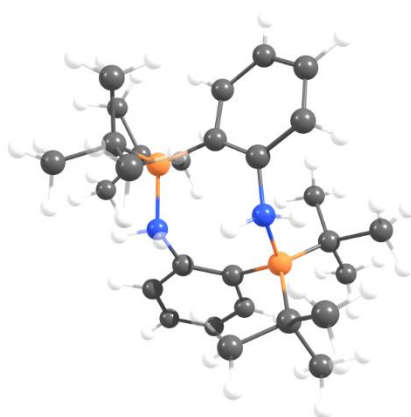

**Figure S37:** Computed structure of H/t-but

Data for system: **H/t-but**

#p m062x/6-31g(d,p) scf=(maxcycles=100) int=ultrafine nosymm freq opt

--Link1--

#p m062x/def2tzvp scf=(maxcycles=100) int=ultrafine nosymm guess=read geom=check  
SCRF=(Solvent=benzene,SMD)

SCF Done: E(UM062X) = -1255.01724994 A.U.  
Zero-point correction= 0.729441 (Hartree/Particle)  
Thermal correction to Energy= 0.763079  
Thermal correction to Enthalpy= 0.764023  
Thermal correction to Gibbs Free Energy= 0.671424

Optimized Geometry (XYZ coordinates in Å)

|   |           |           |           |
|---|-----------|-----------|-----------|
| 6 | 2.778647  | 4.738732  | 1.980245  |
| 6 | 1.579202  | 5.240135  | 1.450021  |
| 5 | 0.008988  | 4.869691  | 1.783161  |
| 7 | 2.841914  | 3.514985  | 2.800868  |
| 6 | 1.753861  | 6.438194  | 0.720702  |
| 1 | 0.884848  | 6.907636  | 0.289236  |
| 6 | 2.962248  | 7.101681  | 0.557663  |
| 1 | 2.998370  | 8.020688  | -0.018480 |
| 6 | 3.991982  | 5.430327  | 1.894404  |
| 1 | 4.864394  | 5.044737  | 2.413639  |
| 6 | 4.102877  | 6.607135  | 1.174613  |
| 1 | 5.053611  | 7.125193  | 1.113664  |
| 1 | 3.775781  | 3.509187  | 3.215282  |
| 1 | 2.237080  | 3.650083  | 3.607868  |
| 6 | -1.266915 | 0.128604  | 1.373709  |
| 6 | -0.080106 | -0.413760 | 0.896553  |
| 1 | -0.078662 | -1.362149 | 0.369202  |
| 1 | -2.214346 | -0.384827 | 1.252345  |
| 6 | -1.213440 | 1.361664  | 2.001561  |
| 6 | 1.119606  | 0.241608  | 1.141816  |
| 1 | 2.023802  | -0.250117 | 0.814348  |
| 6 | 1.237339  | 1.475728  | 1.813360  |
| 6 | -0.000118 | 2.041063  | 2.145615  |
| 1 | -2.131745 | 1.814465  | 2.364732  |
| 7 | -0.129483 | 3.406226  | 2.665998  |
| 5 | 2.733327  | 1.869581  | 2.362994  |
| 1 | 0.395547  | 3.504307  | 3.536041  |
| 1 | -1.097580 | 3.489154  | 2.974589  |
| 6 | -0.496399 | 5.940460  | 3.014909  |
| 6 | -0.943383 | 4.686952  | 0.415083  |
| 6 | 3.969640  | 1.599825  | 1.260007  |
| 6 | 2.875482  | 1.157084  | 3.897498  |
| 6 | -1.688821 | 5.443043  | 3.870953  |
| 1 | -2.542132 | 5.110594  | 3.271816  |
| 1 | -1.415611 | 4.633883  | 4.562450  |
| 1 | -2.049847 | 6.256964  | 4.510769  |
| 6 | -0.928020 | 7.316765  | 2.482182  |
| 1 | -0.161521 | 7.785217  | 1.859849  |
| 1 | -1.853271 | 7.251979  | 1.901967  |
| 1 | -1.119904 | 7.998124  | 3.321983  |
| 6 | 0.647158  | 6.202148  | 4.017766  |
| 1 | 1.049779  | 5.273608  | 4.457733  |
| 1 | 1.484196  | 6.734825  | 3.558249  |
| 1 | 0.288072  | 6.801617  | 4.864116  |
| 6 | -1.012347 | 5.906121  | -0.541047 |
| 1 | -0.101260 | 6.006037  | -1.135677 |
| 1 | -1.827302 | 5.738043  | -1.256603 |
| 1 | -1.212992 | 6.858641  | -0.045663 |
| 6 | -0.415772 | 3.553303  | -0.499422 |

|   |           |           |           |
|---|-----------|-----------|-----------|
| 1 | 0.666149  | 3.644087  | -0.650482 |
| 1 | -0.616417 | 2.548786  | -0.128374 |
| 1 | -0.894577 | 3.627227  | -1.484811 |
| 6 | -2.419869 | 4.397349  | 0.755131  |
| 1 | -2.961125 | 4.095213  | -0.150544 |
| 1 | -2.564881 | 3.591953  | 1.480616  |
| 1 | -2.920421 | 5.289392  | 1.147683  |
| 6 | 4.508887  | 0.150682  | 1.194481  |
| 1 | 5.051807  | -0.119405 | 2.105829  |
| 1 | 3.759040  | -0.623883 | 1.029261  |
| 1 | 5.223982  | 0.076662  | 0.364960  |
| 6 | 5.240603  | 2.446001  | 1.521104  |
| 1 | 5.550443  | 2.479831  | 2.572346  |
| 1 | 6.085635  | 2.021934  | 0.965744  |
| 1 | 5.123065  | 3.465184  | 1.154499  |
| 6 | 3.508239  | 2.004441  | -0.156295 |
| 1 | 4.348521  | 1.952721  | -0.861715 |
| 1 | 2.711547  | 1.363784  | -0.542339 |
| 1 | 3.130810  | 3.034157  | -0.166179 |
| 6 | 2.606963  | -0.359675 | 3.849503  |
| 1 | 2.778594  | -0.799260 | 4.840949  |
| 1 | 1.571776  | -0.574167 | 3.569489  |
| 1 | 3.257483  | -0.881189 | 3.145351  |
| 6 | 4.258938  | 1.345256  | 4.550187  |
| 1 | 4.268568  | 0.896566  | 5.552096  |
| 1 | 5.055260  | 0.869700  | 3.972851  |
| 1 | 4.538407  | 2.399531  | 4.691792  |
| 6 | 1.840365  | 1.700252  | 4.910228  |
| 1 | 0.814027  | 1.590970  | 4.539917  |
| 1 | 1.895383  | 1.130248  | 5.845774  |
| 1 | 2.005664  | 2.746968  | 5.211021  |

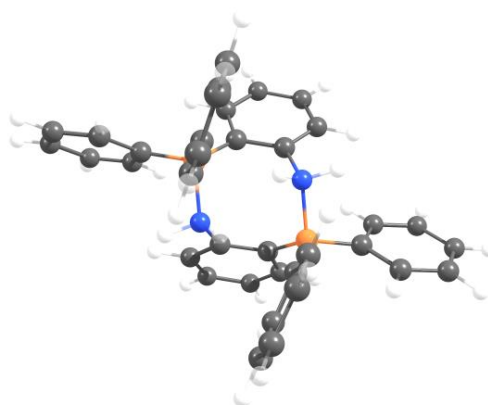

**Figure S38:** Computed structure of H/Ph

Data for system: **H/Ph**

```
#p m062x/6-31g(d,p) scf=(maxcycles=100) int=ultrafine nosymm freq opt
```

```
--Link1--
```

```
#p m062x/def2tzvp scf=(maxcycles=100) int=ultrafine nosymm guess=read geom=check
SCRF=(Solvent=benzene,SMD)
```

SCF Done: E(UM062X) = -1550.35303321 A.U.

Zero-point correction= 0.601317 (Hartree/Particle)

Thermal correction to Energy= 0.633129

Thermal correction to Enthalpy= 0.634073

Thermal correction to Gibbs Free Energy= 0.537435

Optimized Geometry (XYZ coordinates in Å)

|   |           |           |           |
|---|-----------|-----------|-----------|
| 6 | 2.326826  | 4.638180  | 0.726272  |
| 6 | 0.960788  | 4.867108  | 0.501878  |
| 5 | -0.177410 | 4.520792  | 1.614703  |
| 7 | 2.729238  | 3.970776  | 1.962728  |
| 6 | 0.661978  | 5.570085  | -0.673487 |
| 1 | -0.374130 | 5.814821  | -0.882795 |
| 6 | 1.642722  | 5.986463  | -1.572319 |
| 1 | 1.357967  | 6.527757  | -2.468918 |
| 6 | 3.328316  | 5.052691  | -0.143872 |
| 1 | 4.370182  | 4.855327  | 0.093124  |
| 6 | 2.981718  | 5.723320  | -1.312394 |
| 1 | 3.755931  | 6.050261  | -1.998433 |
| 1 | 3.666860  | 4.286999  | 2.213468  |
| 1 | 2.112962  | 4.311669  | 2.710211  |
| 6 | -0.133822 | 0.329737  | -0.698018 |
| 6 | 1.216477  | 0.015438  | -0.786046 |
| 1 | 1.555205  | -0.739964 | -1.487878 |
| 1 | -0.862881 | -0.169820 | -1.327202 |
| 6 | -0.551827 | 1.280916  | 0.227168  |
| 6 | 2.138370  | 0.657918  | 0.038802  |
| 1 | 3.183304  | 0.373246  | -0.026587 |
| 6 | 1.768291  | 1.642329  | 0.965501  |
| 6 | 0.392985  | 1.914136  | 1.025930  |
| 1 | -1.604780 | 1.527931  | 0.331019  |
| 7 | -0.083205 | 2.880195  | 2.013942  |
| 5 | 2.832508  | 2.277635  | 2.022086  |
| 1 | 0.485727  | 2.755274  | 2.859076  |
| 1 | -1.035506 | 2.631150  | 2.284855  |
| 6 | 0.131034  | 5.311455  | 3.008592  |
| 6 | 0.623340  | 6.628167  | 2.961900  |
| 6 | -0.086597 | 4.772248  | 4.287053  |
| 6 | 0.884746  | 7.360073  | 4.116257  |
| 6 | 0.180966  | 5.491253  | 5.452295  |
| 6 | 0.669183  | 6.790351  | 5.370108  |
| 1 | 0.806837  | 7.084213  | 1.991491  |
| 1 | -0.477460 | 3.761494  | 4.405278  |
| 1 | 1.262713  | 8.375183  | 4.038970  |
| 1 | 0.008720  | 5.030391  | 6.420375  |
| 1 | 0.879876  | 7.355171  | 6.272760  |
| 6 | -1.706231 | 4.712405  | 1.109020  |
| 6 | -2.147059 | 4.183008  | -0.118190 |
| 6 | -2.674464 | 5.338568  | 1.906230  |
| 6 | -3.476820 | 4.264379  | -0.522601 |
| 6 | -4.008715 | 5.430743  | 1.510080  |
| 6 | -4.415635 | 4.890774  | 0.294809  |
| 1 | -1.426851 | 3.703183  | -0.777914 |
| 1 | -2.378235 | 5.769023  | 2.859408  |
| 1 | -3.779822 | 3.845843  | -1.478003 |
| 1 | -4.729896 | 5.927298  | 2.152591  |
| 1 | -5.453214 | 4.960835  | -0.017048 |
| 6 | 2.424412  | 1.898103  | 3.556117  |
| 6 | 1.803996  | 0.669637  | 3.843362  |
| 6 | 2.674894  | 2.741175  | 4.651906  |
| 6 | 1.446462  | 0.308479  | 5.140100  |
| 6 | 2.317566  | 2.394780  | 5.954043  |
| 6 | 1.697357  | 1.174577  | 6.202285  |

|   |          |           |           |
|---|----------|-----------|-----------|
| 1 | 1.593279 | -0.015524 | 3.025153  |
| 1 | 3.165562 | 3.703381  | 4.505732  |
| 1 | 0.967980 | -0.649281 | 5.321892  |
| 1 | 2.521039 | 3.081660  | 6.770121  |
| 1 | 1.413698 | 0.899307  | 7.213212  |
| 6 | 4.388902 | 1.972492  | 1.685523  |
| 6 | 5.297318 | 1.570538  | 2.674502  |
| 6 | 4.912012 | 2.175486  | 0.394754  |
| 6 | 6.652464 | 1.386253  | 2.399846  |
| 6 | 6.263234 | 2.000038  | 0.109272  |
| 6 | 7.141404 | 1.604245  | 1.116327  |
| 1 | 4.937106 | 1.392562  | 3.684437  |
| 1 | 4.239814 | 2.468581  | -0.409239 |
| 1 | 7.325752 | 1.069779  | 3.191053  |
| 1 | 6.630364 | 2.164533  | -0.899655 |
| 1 | 8.195540 | 1.461954  | 0.898954  |

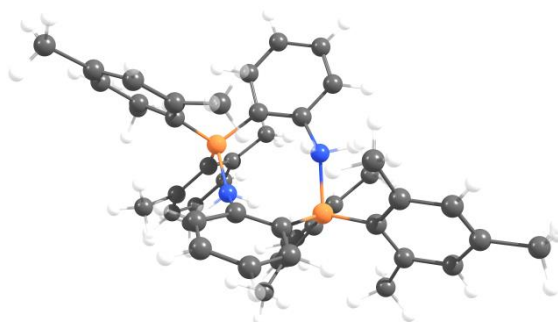

**Figure S39:** Computed structure of H/Mes

Data for system: **H/Mes**

```
#p m062x/6-31g(d,p) scf=(maxcycles=100) int=ultrafine nosymm freq opt
```

```
--Link1--
```

```
#p m062x/def2tzvp scf=(maxcycles=100) int=ultrafine nosymm guess=read geom=check
SCRF=(Solvent=benzene,SMD)
```

SCF Done: E(UM062X) = -2021.99445979 A.U.

Zero-point correction= 0.936845 (Hartree/Particle)

Thermal correction to Energy= 0.987307

Thermal correction to Enthalpy= 0.988251

Thermal correction to Gibbs Free Energy= 0.855557

Optimized Geometry (XYZ coordinates in Å)

|   |           |           |          |
|---|-----------|-----------|----------|
| 6 | 1.750383  | 6.712878  | 3.304481 |
| 6 | 0.394449  | 6.889706  | 2.998687 |
| 5 | -0.758504 | 5.904309  | 2.390065 |
| 7 | 2.440659  | 5.402070  | 3.393194 |
| 6 | -0.105225 | 8.183573  | 3.263683 |
| 1 | -1.165590 | 8.353597  | 3.094267 |
| 6 | 0.666704  | 9.242545  | 3.710350 |
| 1 | 0.213954  | 10.214122 | 3.880107 |
| 6 | 2.546919  | 7.775619  | 3.758421 |
| 1 | 3.596387  | 7.595553  | 3.985496 |
| 6 | 2.025741  | 9.044773  | 3.938779 |
| 1 | 2.663020  | 9.851597  | 4.284268 |
| 1 | 3.398614  | 5.636086  | 3.650664 |



|   |           |          |           |
|---|-----------|----------|-----------|
| 1 | 2.061387  | 4.977046 | 4.239358  |
| 6 | -0.318671 | 1.291424 | 4.261990  |
| 6 | 1.027896  | 0.938731 | 4.319624  |
| 1 | 1.330096  | 0.031963 | 4.833906  |
| 1 | -1.072507 | 0.670065 | 4.734016  |
| 6 | -0.696225 | 2.442466 | 3.580961  |
| 6 | 1.988390  | 1.751198 | 3.722867  |
| 1 | 3.036981  | 1.470068 | 3.784880  |
| 6 | 1.654540  | 2.932809 | 3.043750  |
| 6 | 0.288201  | 3.229676 | 2.989602  |
| 1 | -1.738961 | 2.743145 | 3.516431  |
| 7 | -0.140900 | 4.343976 | 2.152290  |
| 5 | 2.777830  | 3.948257 | 2.421600  |
| 1 | -0.840158 | 3.946863 | 1.530611  |
| 1 | 0.631981  | 4.560239 | 1.512246  |
| 1 | -2.786940 | 7.826413 | 1.524791  |
| 1 | -4.445350 | 7.951548 | 2.127436  |
| 6 | -3.631268 | 7.254401 | 1.911684  |
| 1 | -3.964254 | 6.603927 | 1.097498  |
| 6 | -3.291648 | 6.485181 | 3.175139  |
| 6 | -2.015439 | 5.929970 | 3.458342  |
| 6 | -4.334308 | 6.392290 | 4.103182  |
| 1 | -5.301229 | 6.819645 | 3.843048  |
| 6 | -4.179290 | 5.787190 | 5.344015  |
| 6 | -2.901072 | 5.355084 | 5.676486  |
| 1 | -2.717767 | 4.957444 | 6.673270  |
| 6 | -1.830873 | 5.457004 | 4.784552  |
| 6 | -0.469580 | 5.176781 | 5.387108  |
| 1 | -0.033515 | 6.114566 | 5.752786  |
| 1 | 0.229111  | 4.738503 | 4.681905  |
| 1 | -0.551981 | 4.486247 | 6.230784  |
| 1 | -5.843194 | 4.675907 | 6.147832  |
| 6 | -5.335641 | 5.634966 | 6.297150  |
| 1 | -4.999996 | 5.669945 | 7.336827  |
| 1 | -6.076722 | 6.424638 | 6.149622  |
| 1 | -3.866394 | 4.154417 | 0.498209  |
| 6 | -2.842467 | 4.173744 | 0.880648  |
| 1 | -2.905162 | 4.326862 | 1.957137  |
| 1 | -2.438529 | 3.167006 | 0.693254  |
| 6 | -2.042454 | 5.246940 | 0.144282  |
| 6 | -2.310647 | 5.291639 | -1.223073 |
| 1 | -3.035137 | 4.591861 | -1.638418 |
| 6 | -1.689821 | 6.205437 | -2.064789 |
| 6 | -1.997543 | 6.250224 | -3.539019 |
| 1 | -1.839518 | 5.272763 | -4.006349 |
| 1 | -3.040950 | 6.529005 | -3.716946 |
| 1 | -1.363370 | 6.977617 | -4.052140 |
| 6 | -0.779782 | 7.070923 | -1.479383 |
| 1 | -0.272877 | 7.796073 | -2.113112 |
| 1 | 0.109718  | 8.914004 | 0.849744  |
| 6 | 0.560653  | 8.092001 | 0.287693  |
| 1 | 1.368394  | 7.685385 | 0.895130  |
| 1 | 1.011268  | 8.514811 | -0.614093 |
| 6 | -0.467754 | 7.050229 | -0.112365 |
| 6 | -1.109027 | 6.133458 | 0.763634  |
| 1 | 0.337607  | 2.188710 | 0.575400  |
| 6 | 1.355042  | 2.210758 | 0.167092  |
| 1 | 1.983016  | 1.658307 | 0.866827  |
| 1 | 1.328978  | 1.657594 | -0.775048 |
| 6 | 1.867195  | 3.616257 | -0.097918 |

|   |          |          |           |
|---|----------|----------|-----------|
| 6 | 1.619329 | 4.109435 | -1.379279 |
| 1 | 1.029818 | 3.506335 | -2.067802 |
| 6 | 2.114491 | 5.336023 | -1.811674 |
| 6 | 1.844084 | 5.836756 | -3.205720 |
| 1 | 2.534986 | 5.385188 | -3.925786 |
| 1 | 0.825666 | 5.588404 | -3.516651 |
| 1 | 1.963387 | 6.921956 | -3.264300 |
| 6 | 2.925975 | 6.035627 | -0.929511 |
| 1 | 3.384413 | 6.968681 | -1.254845 |
| 1 | 3.729934 | 7.326897 | 1.541911  |
| 6 | 4.179206 | 6.407710 | 1.153923  |
| 1 | 4.634871 | 5.852113 | 1.975897  |
| 1 | 4.995356 | 6.708641 | 0.490819  |
| 6 | 3.181213 | 5.580833 | 0.367718  |
| 6 | 2.599927 | 4.384494 | 0.851021  |
| 6 | 5.023698 | 2.783201 | 0.548510  |
| 1 | 4.094670 | 2.228328 | 0.411624  |
| 1 | 5.837876 | 2.170769 | 0.153398  |
| 1 | 4.951103 | 3.683654 | -0.067208 |
| 6 | 5.293498 | 3.094348 | 2.007689  |
| 6 | 6.605710 | 2.864022 | 2.424577  |
| 6 | 7.016196 | 3.038821 | 3.741376  |
| 6 | 8.449988 | 2.827221 | 4.150485  |
| 1 | 7.332667 | 2.524194 | 1.689381  |
| 1 | 8.885962 | 1.968306 | 3.633481  |
| 1 | 9.060021 | 3.702050 | 3.902357  |
| 1 | 8.534616 | 2.658419 | 5.226640  |
| 6 | 6.039720 | 3.394977 | 4.658711  |
| 1 | 6.308930 | 3.476848 | 5.710277  |
| 1 | 4.192752 | 3.443865 | 6.359550  |
| 6 | 3.792148 | 3.927535 | 5.466118  |
| 1 | 2.781623 | 3.535807 | 5.330736  |
| 1 | 3.724652 | 4.996761 | 5.706069  |
| 6 | 4.711593 | 3.632122 | 4.284792  |
| 6 | 4.303209 | 3.550525 | 2.922785  |

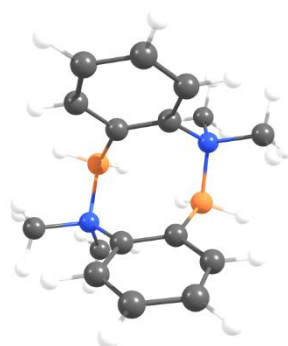

**Figure S40:** Computed structure of CH<sub>3</sub>/H

Data for system: **CH<sub>3</sub>/H**

#p m062x/6-31g(d,p) scf=(maxcycles=100) int=ultrafine nosymm freq opt

--Link1--

#p m062x/def2tzvp scf=(maxcycles=100) int=ultrafine nosymm guess=read geom=check  
 SCRF=(Solvent=benzene,SMD)

SCF Done: E(UM062X) = -783.30835283 A.U.

Zero-point correction= 0.385647 (Hartree/Particle)  
Thermal correction to Energy= 0.402783  
Thermal correction to Enthalpy= 0.403727  
Thermal correction to Gibbs Free Energy= 0.343066

Optimized Geometry (XYZ coordinates in Å)

|   |           |          |           |
|---|-----------|----------|-----------|
| 6 | 2.734058  | 4.333703 | 2.110464  |
| 6 | 1.529864  | 5.005876 | 1.816316  |
| 5 | 0.446838  | 4.670911 | 0.662620  |
| 7 | 3.227056  | 3.264615 | 1.193498  |
| 6 | 1.188222  | 6.055418 | 2.682536  |
| 1 | 0.284856  | 6.616270 | 2.457050  |
| 6 | 1.938634  | 6.411796 | 3.798855  |
| 1 | 1.621390  | 7.229651 | 4.438140  |
| 6 | 3.492901  | 4.671251 | 3.231827  |
| 1 | 4.402352  | 4.144588 | 3.483395  |
| 6 | 3.093430  | 5.701280 | 4.080011  |
| 1 | 3.699703  | 5.941165 | 4.947475  |
| 1 | -0.233767 | 5.647887 | 0.453661  |
| 1 | 0.843553  | 4.211320 | -0.367608 |
| 6 | -0.348888 | 1.648643 | 4.545850  |
| 6 | 0.790837  | 0.892401 | 4.330135  |
| 1 | 1.147210  | 0.198919 | 5.085304  |
| 1 | -0.903646 | 1.570179 | 5.475203  |
| 6 | -0.800431 | 2.514037 | 3.552302  |
| 6 | 1.474923  | 1.040401 | 3.127397  |
| 1 | 2.366370  | 0.443116 | 2.954104  |
| 6 | 1.079705  | 1.921218 | 2.109236  |
| 6 | -0.108563 | 2.641969 | 2.347213  |
| 1 | -1.696319 | 3.082265 | 3.757834  |
| 7 | -0.659365 | 3.532012 | 1.283522  |
| 5 | 2.092819  | 2.037789 | 0.853638  |
| 1 | 1.634802  | 2.305818 | -0.217921 |
| 1 | 2.765911  | 1.035942 | 0.785425  |
| 6 | 3.643134  | 3.895857 | -0.093244 |
| 1 | 4.470758  | 4.586355 | 0.094541  |
| 1 | 3.955745  | 3.101107 | -0.772739 |
| 1 | 2.796266  | 4.426330 | -0.518102 |
| 6 | 4.428870  | 2.576244 | 1.731850  |
| 1 | 4.171707  | 2.085278 | 2.671238  |
| 1 | 4.729840  | 1.823774 | 1.007244  |
| 1 | 5.246181  | 3.285802 | 1.882370  |
| 6 | -1.147350 | 2.681931 | 0.158091  |
| 1 | -0.323989 | 2.080059 | -0.214728 |
| 1 | -1.957775 | 2.040006 | 0.516086  |
| 1 | -1.505199 | 3.343271 | -0.632908 |
| 6 | -1.831034 | 4.312630 | 1.758921  |
| 1 | -2.176816 | 4.925691 | 0.930447  |
| 1 | -2.635191 | 3.646201 | 2.080393  |
| 1 | -1.522208 | 4.961220 | 2.579586  |

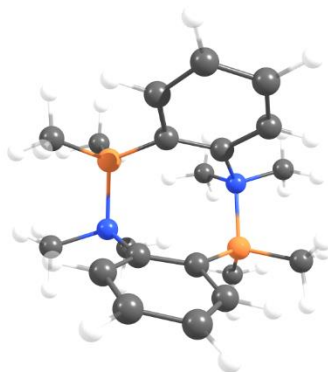

**Figure S41:** Computed structure of CH3/H

Data for system: **CH3/H**

```
#p m062x/6-31g(d,p) scf=(maxcycles=100) int=ultrafine nosymm freq opt
```

--Link1--

```
#p m062x/def2tzvp scf=(maxcycles=100) int=ultrafine nosymm guess=read geom=check
SCRF=(Solvent=benzene,SMD)
```

```
SCF Done: E(RM062X) = -940.51363232 A.U.
Zero-point correction=          0.501418 (Hartree/Particle)
Thermal correction to Energy=    0.524797
Thermal correction to Enthalpy=  0.525741
Thermal correction to Gibbs Free Energy=  0.452145
```

Optimized Geometry (XYZ coordinates in Å)

|   |           |          |           |
|---|-----------|----------|-----------|
| 6 | 3.028388  | 4.272398 | 1.876264  |
| 6 | 1.962751  | 5.202834 | 1.684787  |
| 5 | 0.533255  | 5.249025 | 0.765157  |
| 7 | 3.161763  | 2.995289 | 1.110307  |
| 6 | 2.101893  | 6.348956 | 2.499667  |
| 1 | 1.362558  | 7.129256 | 2.423926  |
| 6 | 3.106751  | 6.579336 | 3.431025  |
| 1 | 3.109248  | 7.501794 | 4.002913  |
| 6 | 4.015977  | 4.469112 | 2.846945  |
| 1 | 4.775633  | 3.721968 | 3.015904  |
| 6 | 4.068815  | 5.610248 | 3.631655  |
| 1 | 4.854393  | 5.724405 | 4.371102  |
| 6 | -0.811432 | 3.462974 | 4.828383  |
| 6 | 0.162735  | 2.541914 | 5.156321  |
| 1 | 0.295047  | 2.202436 | 6.178699  |
| 1 | -1.472556 | 3.891022 | 5.574460  |
| 6 | -0.937318 | 3.830729 | 3.498028  |
| 6 | 1.005481  | 2.068097 | 4.158586  |
| 1 | 1.767380  | 1.383109 | 4.492492  |
| 6 | 0.960107  | 2.415391 | 2.789559  |
| 6 | -0.115290 | 3.307151 | 2.494748  |
| 1 | -1.704177 | 4.550945 | 3.258890  |
| 7 | -0.429750 | 3.800472 | 1.118765  |
| 5 | 2.239938  | 1.713334 | 1.916937  |
| 6 | 2.800976  | 3.231633 | -0.308861 |
| 1 | 3.497023  | 3.956729 | -0.740949 |
| 1 | 2.857459  | 2.287804 | -0.852153 |
| 1 | 1.815517  | 3.642571 | -0.376172 |
| 6 | 4.588517  | 2.557815 | 0.988188  |

|   |           |           |           |
|---|-----------|-----------|-----------|
| 1 | 5.024197  | 2.270412  | 1.933818  |
| 1 | 4.602447  | 1.685979  | 0.332725  |
| 1 | 5.170017  | 3.369337  | 0.543673  |
| 6 | -0.276444 | 2.687511  | 0.149752  |
| 1 | 0.705306  | 2.267916  | 0.219494  |
| 1 | -0.995482 | 1.899153  | 0.391426  |
| 1 | -0.458283 | 3.065030  | -0.857089 |
| 6 | -1.879528 | 4.138743  | 0.958409  |
| 1 | -2.037613 | 4.384886  | -0.092452 |
| 1 | -2.478326 | 3.266606  | 1.232416  |
| 1 | -2.181857 | 4.990829  | 1.549169  |
| 6 | 1.929927  | 0.511128  | 0.842265  |
| 1 | 1.398952  | 0.682996  | -0.097346 |
| 1 | 2.866246  | 0.008249  | 0.567444  |
| 1 | 1.341406  | -0.240808 | 1.382836  |
| 6 | 3.299088  | 1.007087  | 2.947092  |
| 1 | 3.722860  | 1.650488  | 3.728635  |
| 1 | 2.796921  | 0.176980  | 3.454113  |
| 1 | 4.126850  | 0.531677  | 2.414299  |
| 6 | 0.617149  | 5.460440  | -0.861069 |
| 1 | 1.240570  | 6.348578  | -1.023932 |
| 1 | 1.010126  | 4.695416  | -1.535274 |
| 1 | -0.374194 | 5.722452  | -1.252976 |
| 6 | -0.397313 | 6.509528  | 1.241550  |
| 1 | 0.131157  | 7.441535  | 1.017039  |
| 1 | -1.318028 | 6.578034  | 0.656170  |
| 1 | -0.667205 | 6.542320  | 2.304842  |

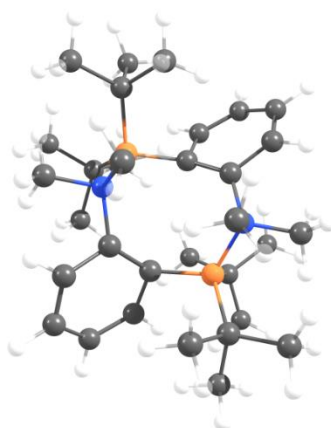

**Figure S42:** Computed structure of CH3/t-but

Data for system: **CH3/t-but**

```
#p m062x/6-31g(d,p) scf=(maxcycles=100) int=ultrafine nosymm freq opt
```

```
--Link1--
```

```
#p m062x/def2tzvp scf=(maxcycles=100) int=ultrafine nosymm guess=read geom=check
SCRF=(Solvent=benzene,SMD)
```

SCF Done: E(UM062X) = -1412.01799724 A.U.

Zero-point correction= 0.849809 (Hartree/Particle)

Thermal correction to Energy= 0.886161

Thermal correction to Enthalpy= 0.887105

Thermal correction to Gibbs Free Energy= 0.791885

Optimized Geometry (XYZ coordinates in Å)

|   |           |           |           |
|---|-----------|-----------|-----------|
| 6 | 0.217869  | 1.896586  | -0.444762 |
| 6 | 1.168202  | 1.099143  | 0.269499  |
| 5 | 1.989465  | -0.400496 | 0.085146  |
| 7 | -1.200963 | 1.531697  | -0.876559 |
| 6 | -1.273338 | -1.110624 | 0.129945  |
| 6 | -0.330757 | -1.858210 | -0.629286 |
| 7 | 1.081512  | -1.435970 | -1.043002 |
| 5 | -2.041571 | 0.389948  | 0.138460  |
| 6 | 3.497914  | 0.126733  | -0.754074 |
| 6 | 2.298274  | -1.340584 | 1.506627  |
| 6 | -2.131185 | 1.051571  | 1.745930  |
| 6 | -3.600782 | -0.010700 | -0.731999 |
| 6 | 4.385739  | -0.903541 | -1.519543 |
| 1 | 4.746726  | -1.725616 | -0.895584 |
| 1 | 3.924727  | -1.334765 | -2.412793 |
| 1 | 5.275910  | -0.378084 | -1.883882 |
| 6 | 4.510854  | 0.737636  | 0.267020  |
| 1 | 4.272803  | 1.770877  | 0.514427  |
| 1 | 4.607807  | 0.181084  | 1.196969  |
| 1 | 5.505766  | 0.762444  | -0.192798 |
| 6 | 3.330612  | 1.275132  | -1.788899 |
| 1 | 2.921439  | 0.949284  | -2.748653 |
| 1 | 2.722627  | 2.102038  | -1.421848 |
| 1 | 4.322814  | 1.687980  | -2.014094 |
| 6 | 2.542056  | -0.519201 | 2.805017  |
| 1 | 1.712099  | 0.145631  | 3.051638  |
| 1 | 2.641839  | -1.222593 | 3.640056  |
| 1 | 3.464593  | 0.067032  | 2.794876  |
| 6 | 1.152886  | -2.286771 | 1.954373  |
| 1 | 0.263496  | -1.736301 | 2.249371  |
| 1 | 0.836438  | -3.027334 | 1.219620  |
| 1 | 1.494920  | -2.850080 | 2.831838  |
| 6 | 3.553192  | -2.256713 | 1.430824  |
| 1 | 3.709175  | -2.711089 | 2.417309  |
| 1 | 3.457202  | -3.089431 | 0.732011  |
| 1 | 4.471737  | -1.723568 | 1.184860  |
| 6 | -3.515458 | 0.932018  | 2.416462  |
| 1 | -4.277131 | 1.510191  | 1.881695  |
| 1 | -3.876507 | -0.094428 | 2.509259  |
| 1 | -3.456191 | 1.339514  | 3.434189  |
| 6 | -1.787391 | 2.552382  | 1.965770  |
| 1 | -2.546520 | 3.229174  | 1.567081  |
| 1 | -1.766760 | 2.736165  | 3.045656  |
| 1 | -0.802233 | 2.841964  | 1.588699  |
| 6 | -1.138109 | 0.342609  | 2.695087  |
| 1 | -1.113032 | 0.858937  | 3.662956  |
| 1 | -1.398964 | -0.695118 | 2.904878  |
| 1 | -0.130553 | 0.357967  | 2.279362  |
| 6 | -4.713184 | -0.674910 | 0.139652  |
| 1 | -5.498794 | -1.028866 | -0.539421 |
| 1 | -4.396141 | -1.549111 | 0.703289  |
| 1 | -5.192508 | 0.025071  | 0.821489  |
| 6 | -4.439503 | 1.126862  | -1.387954 |
| 1 | -5.334031 | 0.679348  | -1.837248 |
| 1 | -4.801725 | 1.852562  | -0.650039 |
| 1 | -3.952827 | 1.686596  | -2.189865 |
| 6 | -3.406295 | -1.075657 | -1.853350 |
| 1 | -3.075126 | -2.034937 | -1.450959 |
| 1 | -4.374298 | -1.254949 | -2.338495 |

|   |           |           |           |
|---|-----------|-----------|-----------|
| 1 | -2.717063 | -0.803025 | -2.651917 |
| 6 | -1.222818 | 1.090816  | -2.300987 |
| 1 | -0.985475 | 0.040816  | -2.359537 |
| 1 | -2.217982 | 1.231292  | -2.707312 |
| 1 | -0.509863 | 1.690036  | -2.875539 |
| 6 | -2.048908 | 2.791487  | -0.854548 |
| 1 | -3.030052 | 2.537564  | -0.486437 |
| 1 | -1.623797 | 3.535633  | -0.201734 |
| 1 | -2.129819 | 3.206119  | -1.861320 |
| 6 | 1.129109  | -0.827148 | -2.404869 |
| 1 | 2.111503  | -1.002912 | -2.831752 |
| 1 | 0.377996  | -1.302535 | -3.042612 |
| 1 | 0.981765  | 0.242531  | -2.344392 |
| 6 | 1.909111  | -2.684870 | -1.192486 |
| 1 | 1.688375  | -3.392070 | -0.403494 |
| 1 | 1.724188  | -3.148581 | -2.163431 |
| 1 | 2.945913  | -2.407902 | -1.139615 |
| 6 | 1.984944  | 1.932202  | 1.075863  |
| 1 | 2.639963  | 1.444715  | 1.774197  |
| 6 | 2.118078  | 3.310301  | 0.994509  |
| 1 | 2.791007  | 3.830664  | 1.668488  |
| 6 | 0.518776  | 3.240360  | -0.732792 |
| 1 | -0.062209 | 3.763339  | -1.482355 |
| 6 | 1.472651  | 3.966151  | -0.041477 |
| 1 | 1.651671  | 5.009542  | -0.275753 |
| 6 | -2.098806 | -1.959250 | 0.910137  |
| 1 | -2.722310 | -1.475217 | 1.646627  |
| 6 | -2.237888 | -3.328897 | 0.779770  |
| 1 | -2.907392 | -3.878405 | 1.433606  |
| 6 | -0.622942 | -3.200066 | -0.945040 |
| 1 | -0.049524 | -3.717076 | -1.700344 |
| 6 | -1.578611 | -3.943503 | -0.275081 |
| 1 | -1.746369 | -4.982034 | -0.538315 |

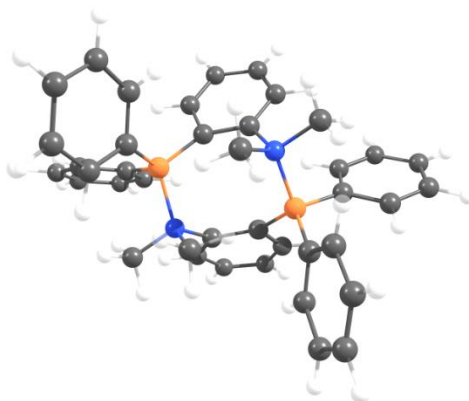

**Figure S43:** Computed structure of CH3/Ph

Data for system: **CH3/Ph**

```
#p m062x/6-31g(d,p) scf=(maxcycles=100) int=ultrafine nosymm freq opt
```

```
--Link1--
```

```
#p m062x/def2tzvp scf=(maxcycles=100) int=ultrafine nosymm guess=read geom=check
SCRF=(Solvent=benzene,SMD)
```

SCF Done: E(UM062X) = -1707.44998948 A.U.

Zero-point correction= 0.717147 (Hartree/Particle)

Thermal correction to Energy= 0.753227  
Thermal correction to Enthalpy= 0.754171  
Thermal correction to Gibbs Free Energy= 0.651625

Optimized Geometry (XYZ coordinates in Å)

|   |           |           |           |
|---|-----------|-----------|-----------|
| 6 | 2.565234  | 4.556897  | 1.229309  |
| 6 | 1.273333  | 5.045378  | 0.894081  |
| 5 | -0.250689 | 4.998464  | 1.595043  |
| 7 | 2.852180  | 3.763157  | 2.472826  |
| 6 | 1.281115  | 5.921452  | -0.218217 |
| 1 | 0.354290  | 6.409531  | -0.484711 |
| 6 | 2.385043  | 6.234446  | -0.997710 |
| 1 | 2.280194  | 6.921548  | -1.831028 |
| 6 | 3.677641  | 4.835049  | 0.422159  |
| 1 | 4.640146  | 4.402914  | 0.643279  |
| 6 | 3.600377  | 5.649541  | -0.695906 |
| 1 | 4.488452  | 5.831775  | -1.291763 |
| 6 | -0.828272 | 0.806306  | -0.649708 |
| 6 | 0.409652  | 0.199990  | -0.549295 |
| 1 | 0.675602  | -0.647798 | -1.172237 |
| 1 | -1.571115 | 0.478304  | -1.369102 |
| 6 | -1.125675 | 1.840765  | 0.222666  |
| 6 | 1.326610  | 0.700310  | 0.363521  |
| 1 | 2.277451  | 0.188948  | 0.414830  |
| 6 | 1.114838  | 1.795558  | 1.235428  |
| 6 | -0.207203 | 2.313598  | 1.170641  |
| 1 | -2.102741 | 2.287149  | 0.132720  |
| 7 | -0.736762 | 3.350654  | 2.121188  |
| 5 | 2.452053  | 2.028392  | 2.222433  |
| 6 | 4.310420  | 3.864526  | 2.835318  |
| 1 | 4.589708  | 4.919858  | 2.858751  |
| 1 | 4.440029  | 3.436437  | 3.824645  |
| 1 | 4.947912  | 3.318251  | 2.153214  |
| 6 | 2.214310  | 4.472282  | 3.626333  |
| 1 | 1.171995  | 4.662856  | 3.447999  |
| 1 | 2.334177  | 3.873519  | 4.528024  |
| 1 | 2.701406  | 5.442961  | 3.749768  |
| 6 | -2.241020 | 3.297110  | 2.172413  |
| 1 | -2.702126 | 3.666315  | 1.266231  |
| 1 | -2.545343 | 2.266226  | 2.364574  |
| 1 | -2.570557 | 3.928274  | 2.992112  |
| 6 | -0.381684 | 2.921785  | 3.510515  |
| 1 | -0.907837 | 1.989579  | 3.731556  |
| 1 | 0.669395  | 2.721186  | 3.607260  |
| 1 | -0.678897 | 3.697526  | 4.214602  |
| 6 | -0.349909 | 6.103236  | 2.815723  |
| 6 | -1.278082 | 6.126892  | 3.871995  |
| 6 | 0.501930  | 7.224350  | 2.753472  |
| 6 | -1.343479 | 7.163035  | 4.803691  |
| 6 | 0.442834  | 8.271384  | 3.668370  |
| 6 | -0.479313 | 8.246182  | 4.709843  |
| 1 | -2.002262 | 5.329558  | 3.995215  |
| 1 | 1.243078  | 7.283438  | 1.962757  |
| 1 | -2.080366 | 7.118856  | 5.600231  |
| 1 | 1.125062  | 9.110176  | 3.565012  |
| 1 | -0.526700 | 9.056877  | 5.429868  |
| 6 | -1.392547 | 5.340284  | 0.464648  |
| 6 | -1.395600 | 4.726894  | -0.803854 |
| 6 | -2.447218 | 6.227673  | 0.721994  |



|   |           |           |           |
|---|-----------|-----------|-----------|
| 6 | -2.409593 | 4.942378  | -1.731192 |
| 6 | -3.466962 | 6.459487  | -0.202814 |
| 6 | -3.460527 | 5.807771  | -1.430049 |
| 1 | -0.571693 | 4.073128  | -1.076863 |
| 1 | -2.483260 | 6.752254  | 1.672112  |
| 1 | -2.374140 | 4.442259  | -2.694815 |
| 1 | -4.265399 | 7.154468  | 0.040317  |
| 1 | -4.253122 | 5.982071  | -2.151262 |
| 6 | 3.803450  | 1.478149  | 1.467994  |
| 6 | 4.756553  | 0.694274  | 2.133784  |
| 6 | 4.096038  | 1.802855  | 0.128481  |
| 6 | 5.947424  | 0.294286  | 1.524860  |
| 6 | 5.282212  | 1.418132  | -0.487628 |
| 6 | 6.222682  | 0.665317  | 0.214350  |
| 1 | 4.573471  | 0.388200  | 3.159448  |
| 1 | 3.366256  | 2.361274  | -0.451454 |
| 1 | 6.658051  | -0.311148 | 2.079892  |
| 1 | 5.468507  | 1.697356  | -1.520704 |
| 1 | 7.148966  | 0.359658  | -0.262433 |
| 6 | 2.257836  | 1.217472  | 3.645522  |
| 6 | 2.938834  | 1.444125  | 4.854849  |
| 6 | 1.407752  | 0.093306  | 3.648453  |
| 6 | 2.774431  | 0.639648  | 5.982433  |
| 6 | 1.240254  | -0.725602 | 4.761199  |
| 6 | 1.919137  | -0.453988 | 5.944840  |
| 1 | 3.642995  | 2.262624  | 4.952153  |
| 1 | 0.851050  | -0.152500 | 2.749676  |
| 1 | 3.325664  | 0.871895  | 6.888864  |
| 1 | 0.572174  | -1.579795 | 4.700188  |
| 1 | 1.788230  | -1.085290 | 6.817894  |

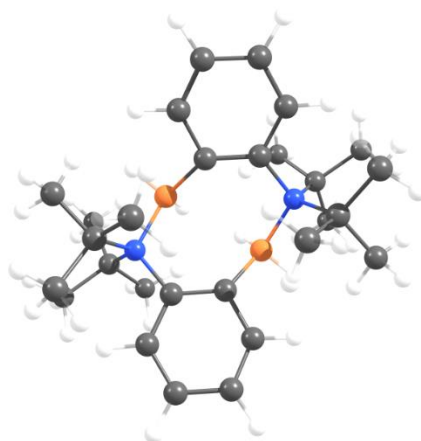

**Figure S44:** Computed structure of tbut/H

Data for system: **tbut/H**

```
#p m062x/6-31g(d,p) scf=(maxcycles=100) int=ultrafine nosymm freq opt
```

```
--Link1--
```

```
#p m062x/def2tzvp scf=(maxcycles=100) int=ultrafine nosymm guess=read geom=check
SCRF=(Solvent=benzene,SMD)
```

SCF Done: E(UM062X) = -1254.86453350 A.U.

Zero-point correction= 0.729863 (Hartree/Particle)

Thermal correction to Energy= 0.761606

Thermal correction to Enthalpy= 0.762550  
Thermal correction to Gibbs Free Energy= 0.674293

Optimized Geometry (XYZ coordinates in Å)

|   |           |           |           |
|---|-----------|-----------|-----------|
| 6 | 2.738899  | 4.863988  | 2.190315  |
| 6 | 1.344906  | 4.987388  | 2.002329  |
| 5 | 0.200197  | 4.131520  | 1.167546  |
| 7 | 3.540276  | 3.616361  | 1.901434  |
| 6 | 0.830316  | 6.274884  | 2.321335  |
| 1 | -0.233487 | 6.426892  | 2.181590  |
| 6 | 1.557503  | 7.359421  | 2.771695  |
| 1 | 1.064357  | 8.301911  | 2.987678  |
| 6 | 3.486927  | 5.984781  | 2.596396  |
| 1 | 4.552776  | 5.916315  | 2.670700  |
| 6 | 2.930644  | 7.213850  | 2.895050  |
| 1 | 3.569583  | 8.035726  | 3.201663  |
| 1 | -0.596143 | 4.970734  | 0.889230  |
| 1 | 0.638693  | 3.695579  | 0.152421  |
| 6 | -0.273284 | -0.578341 | 3.218038  |
| 6 | 1.104605  | -0.730476 | 3.202995  |
| 1 | 1.579581  | -1.641396 | 3.553358  |
| 1 | -0.933554 | -1.364525 | 3.569758  |
| 6 | -0.804970 | 0.608132  | 2.750162  |
| 6 | 1.863263  | 0.301162  | 2.685379  |
| 1 | 2.933500  | 0.139321  | 2.634090  |
| 6 | 1.374740  | 1.543491  | 2.193310  |
| 6 | -0.028174 | 1.681027  | 2.274234  |
| 1 | -1.873266 | 0.679747  | 2.746029  |
| 7 | -0.804297 | 2.886503  | 1.798382  |
| 5 | 2.574334  | 2.307231  | 1.346121  |
| 1 | 2.203730  | 2.629363  | 0.263734  |
| 1 | 3.382888  | 1.444525  | 1.212240  |
| 6 | 4.479137  | 3.920152  | 0.619915  |
| 6 | 4.295564  | 3.171832  | 3.234925  |
| 6 | -1.657965 | 2.440597  | 0.499092  |
| 6 | -1.643775 | 3.472037  | 3.022657  |
| 6 | 4.888361  | 2.652700  | -0.166481 |
| 1 | 5.390946  | 1.907663  | 0.447916  |
| 1 | 4.048123  | 2.184277  | -0.669350 |
| 1 | 5.599404  | 2.984390  | -0.928757 |
| 6 | 5.817314  | 4.626918  | 0.913461  |
| 1 | 5.730425  | 5.601823  | 1.385568  |
| 1 | 6.511679  | 4.001985  | 1.477021  |
| 1 | 6.278186  | 4.807956  | -0.061081 |
| 6 | 3.688893  | 4.817089  | -0.349636 |
| 1 | 4.208169  | 4.798074  | -1.312158 |
| 1 | 2.671816  | 4.453069  | -0.499690 |
| 1 | 3.642805  | 5.853290  | -0.010448 |
| 6 | 3.226105  | 2.844103  | 4.291101  |
| 1 | 2.470228  | 3.632752  | 4.337195  |
| 1 | 2.732323  | 1.894011  | 4.123933  |
| 1 | 3.718492  | 2.797909  | 5.266462  |
| 6 | 5.211334  | 4.197361  | 3.958211  |
| 1 | 4.643436  | 4.966710  | 4.479841  |
| 1 | 5.737686  | 3.620475  | 4.723552  |
| 1 | 5.975551  | 4.662754  | 3.340916  |
| 6 | 5.194120  | 1.945762  | 3.004199  |
| 1 | 5.461442  | 1.552670  | 3.989260  |
| 1 | 4.711333  | 1.152048  | 2.444338  |

|   |           |          |           |
|---|-----------|----------|-----------|
| 1 | 6.127400  | 2.214607 | 2.502948  |
| 6 | -2.606326 | 2.527359 | 3.793285  |
| 1 | -3.329414 | 1.993320 | 3.182112  |
| 1 | -2.074833 | 1.822571 | 4.431478  |
| 1 | -3.180165 | 3.181711 | 4.455143  |
| 6 | -2.522793 | 4.660893 | 2.600538  |
| 1 | -2.002164 | 5.391538 | 1.990763  |
| 1 | -3.421594 | 4.334518 | 2.071309  |
| 1 | -2.853501 | 5.157527 | 3.517238  |
| 6 | -0.644473 | 3.920530 | 4.102890  |
| 1 | -1.197603 | 4.065392 | 5.035070  |
| 1 | 0.109662  | 3.149001 | 4.279960  |
| 1 | -0.144154 | 4.852332 | 3.866326  |
| 6 | -3.014681 | 1.764411 | 0.779900  |
| 1 | -3.410750 | 1.475200 | -0.197032 |
| 1 | -2.962156 | 0.847844 | 1.361418  |
| 1 | -3.742932 | 2.444563 | 1.224155  |
| 6 | -0.808573 | 1.446415 | -0.312707 |
| 1 | -0.788101 | 0.453760 | 0.140194  |
| 1 | -1.263584 | 1.357967 | -1.303468 |
| 1 | 0.217295  | 1.795961 | -0.434588 |
| 6 | -2.011269 | 3.612810 | -0.445823 |
| 1 | -2.672418 | 3.197059 | -1.211760 |
| 1 | -2.550311 | 4.418335 | 0.049781  |
| 1 | -1.138872 | 4.026854 | -0.941578 |

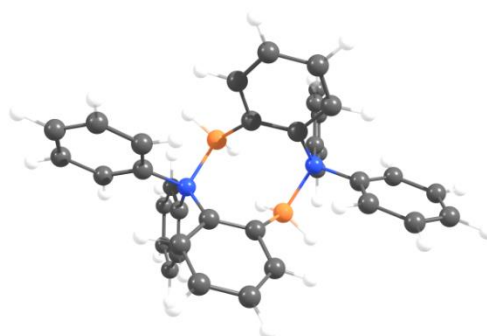

**Figure S45:** Computed structure of Ph/H

Data for system: **Ph/H**

```
#p m062x/6-31g(d,p) scf=(maxcycles=100) int=ultrafine nosymm freq opt
```

```
--Link1--
```

```
#p m062x/def2tzvp scf=(maxcycles=100) int=ultrafine nosymm guess=read geom=check
SCRF=(Solvent=benzene,SMD)
```

```
SCF Done: E(RM062X) = -1550.20761989 A.U.
Zero-point correction=          0.594776 (Hartree/Particle)
Thermal correction to Energy=    0.625482
Thermal correction to Enthalpy=  0.626426
Thermal correction to Gibbs Free Energy=  0.533835
```

Optimized Geometry (XYZ coordinates in Å)

|   |          |          |          |
|---|----------|----------|----------|
| 6 | 2.916697 | 4.455753 | 2.188558 |
| 6 | 1.630198 | 4.998347 | 2.033738 |
| 5 | 0.539763 | 4.576075 | 0.923956 |
| 7 | 3.363092 | 3.317103 | 1.316047 |

|   |           |           |           |
|---|-----------|-----------|-----------|
| 6 | 1.378521  | 6.176431  | 2.761634  |
| 1 | 0.414674  | 6.655750  | 2.616556  |
| 6 | 2.298938  | 6.767399  | 3.618306  |
| 1 | 2.045035  | 7.675736  | 4.155737  |
| 6 | 3.870043  | 5.056354  | 3.016776  |
| 1 | 4.874293  | 4.659098  | 3.083270  |
| 6 | 3.557601  | 6.196853  | 3.747144  |
| 1 | 4.311835  | 6.644481  | 4.386134  |
| 1 | -0.196413 | 5.504693  | 0.701494  |
| 1 | 1.029841  | 4.144543  | -0.072510 |
| 6 | -0.575955 | 1.055754  | 4.480171  |
| 6 | 0.672888  | 0.459052  | 4.376022  |
| 1 | 0.977194  | -0.313932 | 5.074793  |
| 1 | -1.271956 | 0.763957  | 5.259906  |
| 6 | -0.956369 | 2.013952  | 3.547987  |
| 6 | 1.515706  | 0.842023  | 3.340047  |
| 1 | 2.468389  | 0.333345  | 3.223776  |
| 6 | 1.195852  | 1.837320  | 2.397569  |
| 6 | -0.078532 | 2.412155  | 2.535011  |
| 1 | -1.955157 | 2.425815  | 3.607764  |
| 7 | -0.604668 | 3.339235  | 1.476269  |
| 5 | 2.189474  | 2.000630  | 1.138619  |
| 1 | 1.616892  | 2.210322  | 0.115160  |
| 1 | 2.913549  | 1.039374  | 1.063436  |
| 6 | 4.560224  | 2.655706  | 1.907338  |
| 6 | 4.445400  | 2.159028  | 3.208731  |
| 6 | 5.767767  | 2.535316  | 1.231747  |
| 6 | 5.515715  | 1.514219  | 3.808001  |
| 6 | 6.841165  | 1.882037  | 1.844145  |
| 6 | 6.722855  | 1.363531  | 3.124041  |
| 1 | 3.520748  | 2.305866  | 3.753366  |
| 1 | 5.894627  | 2.939584  | 0.236732  |
| 1 | 5.407414  | 1.134494  | 4.818785  |
| 1 | 7.776557  | 1.791194  | 1.301783  |
| 1 | 7.560487  | 0.858145  | 3.592660  |
| 6 | 3.679541  | 3.835509  | -0.045586 |
| 6 | 3.947888  | 5.182761  | -0.265301 |
| 6 | 3.776304  | 2.925864  | -1.099897 |
| 6 | 4.288565  | 5.619648  | -1.545120 |
| 6 | 4.125077  | 3.371216  | -2.368484 |
| 6 | 4.378279  | 4.721560  | -2.600023 |
| 1 | 3.877968  | 5.901355  | 0.541126  |
| 1 | 3.586391  | 1.875590  | -0.920610 |
| 1 | 4.481735  | 6.674939  | -1.706946 |
| 1 | 4.194839  | 2.654661  | -3.180212 |
| 1 | 4.642380  | 5.067230  | -3.593950 |
| 6 | -1.755087 | 4.123937  | 2.005903  |
| 6 | -3.014473 | 4.107906  | 1.420524  |
| 6 | -1.538589 | 4.888988  | 3.155389  |
| 6 | -4.039291 | 4.889341  | 1.962058  |
| 6 | -2.561287 | 5.659080  | 3.685908  |
| 6 | -3.821119 | 5.670985  | 3.085697  |
| 1 | -3.218925 | 3.499538  | 0.550069  |
| 1 | -0.571410 | 4.854522  | 3.641602  |
| 1 | -5.016316 | 4.870607  | 1.490437  |
| 1 | -2.373759 | 6.247434  | 4.578254  |
| 1 | -4.621517 | 6.274609  | 3.500016  |
| 6 | -1.026124 | 2.541950  | 0.289097  |
| 6 | -1.216015 | 3.203256  | -0.925445 |
| 6 | -1.299282 | 1.181426  | 0.387933  |

|   |           |           |           |
|---|-----------|-----------|-----------|
| 6 | -1.661989 | 2.497449  | -2.035553 |
| 6 | -1.738135 | 0.481433  | -0.735562 |
| 6 | -1.920737 | 1.131247  | -1.948782 |
| 1 | -1.021758 | 4.265757  | -0.993296 |
| 1 | -1.158241 | 0.653404  | 1.322218  |
| 1 | -1.803366 | 3.022312  | -2.974574 |
| 1 | -1.934271 | -0.582174 | -0.649555 |
| 1 | -2.260873 | 0.581292  | -2.819982 |

#### 4. Cartesian coordinates of aminoalanes

##### 4.1 Monomers

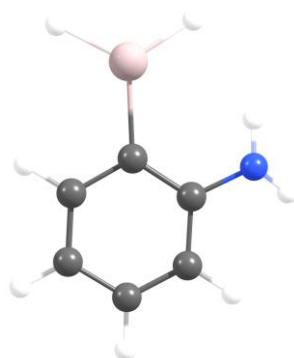

Figure S46: Computed structure of H/H (FLP)

Data for system: **H/H (FLP)**

```
#p m062x/6-31g(d,p) scf=(maxcycles=100) int=ultrafine nosymm freq opt
```

```
--Link1--
```

```
#p m062x/def2tzvp scf=(maxcycles=100) int=ultrafine nosymm guess=read geom=check  
SCRF=(Solvent=benzene,SMD)
```

SCF Done: E(RM062X) = -530.595386506 A.U.

Zero-point correction= 0.121619 (Hartree/Particle)

Thermal correction to Energy= 0.129863

Thermal correction to Enthalpy= 0.130807

Thermal correction to Gibbs Free Energy= 0.089133

Optimized Geometry (XYZ coordinates in Angstrom)

|    |           |          |           |
|----|-----------|----------|-----------|
| 6  | 2.605321  | 4.815574 | 2.326664  |
| 6  | 1.245839  | 5.116045 | 2.063556  |
| 13 | -0.186540 | 5.059213 | 3.360057  |
| 7  | 3.008477  | 4.358628 | 3.574064  |
| 6  | 0.908406  | 5.505254 | 0.753041  |
| 1  | -0.131765 | 5.735296 | 0.526795  |
| 6  | 1.848723  | 5.609978 | -0.264009 |
| 1  | 1.555589  | 5.915029 | -1.262383 |
| 6  | 3.558284  | 4.920242 | 1.301407  |
| 1  | 4.597734  | 4.682984 | 1.512947  |
| 6  | 3.180134  | 5.313397 | 0.026616  |
| 1  | 3.935597  | 5.388026 | -0.750137 |
| 1  | 3.988319  | 4.468598 | 3.787673  |

|   |           |          |          |
|---|-----------|----------|----------|
| 1 | 0.121556  | 4.810830 | 4.897890 |
| 1 | -1.664290 | 5.311044 | 2.862291 |
| 1 | 2.404723  | 4.580691 | 4.352642 |

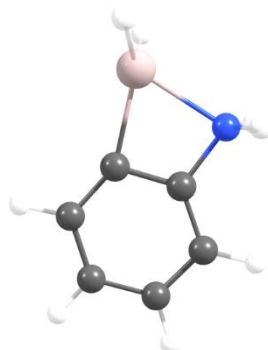

**Figure S47:** Computed structure of H/H (CLA)

Data for system: **H/H (CLA)**

```
#p m062x/6-31g(d,p) scf=(maxcycles=100) int=ultrafine nosymm freq opt
```

--Link1--

```
#p m062x/def2tzvp scf=(maxcycles=100) int=ultrafine nosymm guess=read geom=check
SCRF=(Solvent=benzene,SMD)
```

```
SCF Done: E(RM062X) = -530.614729754 A.U.
Zero-point correction=          0.123173 (Hartree/Particle)
Thermal correction to Energy=    0.130607
Thermal correction to Enthalpy=  0.131551
Thermal correction to Gibbs Free Energy=  0.091653
```

Optimized Geometry (XYZ coordinates in Angstrom)

|    |           |          |           |
|----|-----------|----------|-----------|
| 6  | 2.409165  | 4.833957 | 2.287812  |
| 6  | 1.087309  | 5.167768 | 1.988336  |
| 13 | 0.462089  | 4.793761 | 3.840327  |
| 7  | 2.529789  | 4.434656 | 3.701232  |
| 6  | 0.830944  | 5.567680 | 0.672985  |
| 1  | -0.175009 | 5.842572 | 0.367681  |
| 6  | 1.860124  | 5.620034 | -0.265111 |
| 1  | 1.648074  | 5.932347 | -1.283265 |
| 6  | 3.463823  | 4.872243 | 1.382972  |
| 1  | 4.475430  | 4.600458 | 1.672500  |
| 6  | 3.168669  | 5.275259 | 0.084237  |
| 1  | 3.958045  | 5.321708 | -0.658959 |
| 1  | 2.854019  | 3.475950 | 3.812470  |
| 1  | 0.266968  | 6.008276 | 4.845116  |
| 1  | -0.230123 | 3.398583 | 4.151489  |
| 1  | 3.153856  | 5.042124 | 4.228618  |

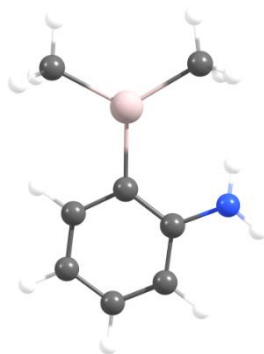

**Figure S48:** Computed structure of H/CH3 (FLP)

Data for system: **H/CH3 (FLP)**

```
#p m062x/6-31g(d,p) scf=(maxcycles=100) int=ultrafine nosymm freq opt
```

--Link1--

```
#p m062x/def2tzvp scf=(maxcycles=100) int=ultrafine nosymm guess=read geom=check
SCRF=(Solvent=benzene,SMD)
```

```
SCF Done: E(RM062X) = -609.248464981 A.U.
Zero-point correction=          0.180372 (Hartree/Particle)
Thermal correction to Energy=    0.192582
Thermal correction to Enthalpy=  0.193526
Thermal correction to Gibbs Free Energy=  0.141846
```

Optimized Geometry (XYZ coordinates in Angstrom)

|    |           |          |           |
|----|-----------|----------|-----------|
| 6  | 2.624473  | 4.692240 | 1.683870  |
| 6  | 1.325492  | 5.206034 | 1.455884  |
| 13 | -0.216471 | 5.010313 | 2.632781  |
| 7  | 2.908199  | 3.955549 | 2.833530  |
| 6  | 1.110881  | 5.889133 | 0.245211  |
| 1  | 0.120478  | 6.294638 | 0.040722  |
| 6  | 2.106770  | 6.068280 | -0.708925 |
| 1  | 1.902737  | 6.601645 | -1.630964 |
| 6  | 3.632748  | 4.863842 | 0.724101  |
| 1  | 4.623509  | 4.456949 | 0.911255  |
| 6  | 3.372818  | 5.544200 | -0.456826 |
| 1  | 4.169127  | 5.667275 | -1.185087 |
| 1  | 3.890047  | 3.877146 | 3.056432  |
| 1  | 2.351203  | 4.183637 | 3.644415  |
| 6  | -1.934924 | 5.674009 | 1.961977  |
| 1  | -2.166410 | 5.268395 | 0.971246  |
| 1  | -2.768389 | 5.425952 | 2.624701  |
| 1  | -1.920652 | 6.764769 | 1.852689  |
| 6  | -0.037183 | 4.215792 | 4.423064  |
| 1  | -0.994221 | 4.156397 | 4.948634  |
| 1  | 0.372412  | 3.200242 | 4.370885  |
| 1  | 0.639568  | 4.796413 | 5.063245  |

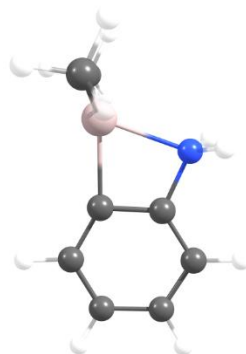

**Figure S49:** Computed structure of H/CH3 (CLA)

Data for system: **H/CH3 (CLA)**

```
#p m062x/6-31g(d,p) scf=(maxcycles=100) int=ultrafine nosymm freq opt
```

--Link1--

```
#p m062x/def2tzvp scf=(maxcycles=100) int=ultrafine nosymm guess=read geom=check
SCRF=(Solvent=benzene,SMD)
```

```
SCF Done: E(RM062X) = -609.263666614 A.U.
Zero-point correction=          0.181151 (Hartree/Particle)
Thermal correction to Energy=    0.192931
Thermal correction to Enthalpy=  0.193875
Thermal correction to Gibbs Free Energy=  0.143391
```

Optimized Geometry (XYZ coordinates in Angstrom)

|    |           |          |           |
|----|-----------|----------|-----------|
| 6  | 2.384759  | 4.780379 | 1.556342  |
| 6  | 1.166710  | 5.352217 | 1.182885  |
| 13 | 0.228544  | 4.709592 | 2.827181  |
| 7  | 2.257941  | 4.090993 | 2.851918  |
| 6  | 1.156790  | 6.039546 | -0.036094 |
| 1  | 0.244860  | 6.511058 | -0.393071 |
| 6  | 2.310762  | 6.132232 | -0.812249 |
| 1  | 2.286598  | 6.669108 | -1.755959 |
| 6  | 3.557743  | 4.849200 | 0.812745  |
| 1  | 4.478321  | 4.383456 | 1.154814  |
| 6  | 3.505682  | 5.541694 | -0.393187 |
| 1  | 4.395954  | 5.622554 | -1.008541 |
| 1  | 2.453108  | 3.093992 | 2.785424  |
| 1  | 2.867882  | 4.484293 | 3.565928  |
| 6  | -0.869051 | 3.079647 | 2.706950  |
| 1  | -0.488403 | 2.371854 | 1.962151  |
| 1  | -0.928660 | 2.550673 | 3.664811  |
| 1  | -1.899733 | 3.311972 | 2.416113  |
| 6  | -0.010196 | 5.965716 | 4.324176  |
| 1  | -0.066492 | 5.450420 | 5.289683  |
| 1  | 0.799770  | 6.700739 | 4.389015  |
| 1  | -0.940126 | 6.536519 | 4.222623  |



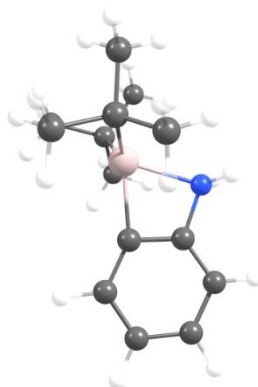

**Figure S50:** Computed structure of H/t-but (CLA)

Data for system: **H/t-but (CLA)**

```
#p m062x/6-31g(d,p) scf=(maxcycles=100) int=ultrafine nosymm freq opt
```

--Link1--

```
#p m062x/def2tzvp scf=(maxcycles=100) int=ultrafine nosymm guess=read geom=check
SCRF=(Solvent=benzene,SMD)
```

```
SCF Done: E(RM062X) = -845.095725289 A.U.
Zero-point correction=          0.352792 (Hartree/Particle)
Thermal correction to Energy=    0.372294
Thermal correction to Enthalpy=   0.373239
Thermal correction to Gibbs Free Energy=  0.305411
```

Optimized Geometry (XYZ coordinates in Angstrom)

|    |           |          |           |
|----|-----------|----------|-----------|
| 6  | 2.492541  | 5.537640 | 1.526600  |
| 6  | 1.418298  | 5.921236 | 2.332645  |
| 13 | 0.179817  | 4.600964 | 1.489188  |
| 7  | 2.090002  | 4.468674 | 0.594131  |
| 6  | 1.673336  | 6.939115 | 3.258293  |
| 1  | 0.884317  | 7.291069 | 3.917883  |
| 6  | 2.938297  | 7.517427 | 3.350983  |
| 1  | 3.121012  | 8.306239 | 4.074622  |
| 6  | 3.767966  | 6.087650 | 1.586892  |
| 1  | 4.567073  | 5.748713 | 0.932901  |
| 6  | 3.981198  | 7.095739 | 2.522476  |
| 1  | 4.960535  | 7.555587 | 2.606774  |
| 1  | 2.180937  | 4.751329 | -0.380330 |
| 1  | 2.624882  | 3.611702 | 0.725926  |
| 6  | -1.100700 | 5.341256 | 0.154508  |
| 6  | -0.107830 | 2.864780 | 2.419909  |
| 6  | -2.074544 | 6.254284 | 0.915919  |
| 1  | -2.660185 | 5.699153 | 1.659928  |
| 1  | -1.550411 | 7.062824 | 1.439997  |
| 1  | -2.793165 | 6.724295 | 0.225928  |
| 6  | -1.907331 | 4.268870 | -0.585326 |
| 1  | -1.263135 | 3.588542 | -1.156519 |
| 1  | -2.502262 | 3.656837 | 0.103052  |
| 1  | -2.608932 | 4.727901 | -1.300067 |
| 6  | -0.346777 | 6.191655 | -0.875880 |
| 1  | 0.283047  | 6.955171 | -0.401623 |

|   |           |          |           |
|---|-----------|----------|-----------|
| 1 | 0.294026  | 5.575625 | -1.521530 |
| 1 | -1.047856 | 6.716905 | -1.543315 |
| 6 | -0.149447 | 1.710286 | 1.410106  |
| 1 | 0.780188  | 1.635705 | 0.829449  |
| 1 | -0.281659 | 0.744365 | 1.922965  |
| 1 | -0.974866 | 1.815065 | 0.697252  |
| 6 | 1.033087  | 2.608924 | 3.412025  |
| 1 | 1.096621  | 3.392950 | 4.174494  |
| 1 | 0.894865  | 1.647741 | 3.931866  |
| 1 | 2.012350  | 2.562070 | 2.915540  |
| 6 | -1.433970 | 2.891777 | 3.192217  |
| 1 | -1.601742 | 1.940751 | 3.722330  |
| 1 | -1.452352 | 3.687927 | 3.946921  |
| 1 | -2.292218 | 3.045741 | 2.526622  |

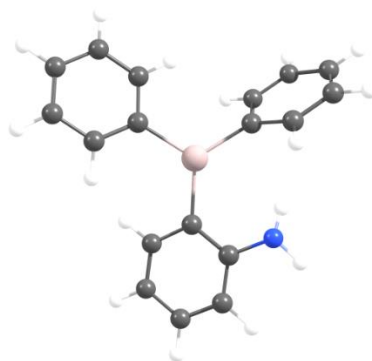

**Figure S51:** Computed structure of H/Ph (FLP)

Data for system: **H/Ph (FLP)**

```
#p m062x/6-31g(d,p) scf=(maxcycles=100) int=ultrafine nosymm freq opt
```

```
--Link1--
```

```
#p m062x/def2tzvp scf=(maxcycles=100) int=ultrafine nosymm guess=read geom=check
SCRF=(Solvent=benzene,SMD)
```

SCF Done: E(RM062X) = -992.711633146 A.U.

Zero-point correction= 0.291443 (Hartree/Particle)

Thermal correction to Energy= 0.309289

Thermal correction to Enthalpy= 0.310233

Thermal correction to Gibbs Free Energy= 0.243124

Optimized Geometry (XYZ coordinates in Angstrom)

|    |           |          |           |
|----|-----------|----------|-----------|
| 6  | 2.366766  | 4.189124 | 0.385905  |
| 6  | 1.161873  | 4.929194 | 0.416202  |
| 13 | -0.340283 | 4.546529 | 1.594667  |
| 7  | 2.540021  | 3.098897 | 1.246853  |
| 6  | 1.043016  | 6.003729 | -0.482542 |
| 1  | 0.137847  | 6.608512 | -0.466103 |
| 6  | 2.038772  | 6.329524 | -1.398939 |
| 1  | 1.911782  | 7.164299 | -2.079546 |
| 6  | 3.366145  | 4.502694 | -0.543683 |
| 1  | 4.281560  | 3.916466 | -0.563664 |
| 6  | 3.197919  | 5.559252 | -1.429350 |
| 1  | 3.986337  | 5.787538 | -2.140411 |

|   |           |          |           |
|---|-----------|----------|-----------|
| 1 | 3.491733  | 2.759623 | 1.289813  |
| 1 | 2.168799  | 3.241598 | 2.178994  |
| 6 | -0.161652 | 3.671785 | 3.348456  |
| 6 | -0.511849 | 4.388536 | 4.508062  |
| 6 | 0.248140  | 2.338067 | 3.527673  |
| 6 | -0.445440 | 3.815326 | 5.776024  |
| 6 | 0.306809  | 1.751838 | 4.790638  |
| 6 | -0.036994 | 2.491921 | 5.918414  |
| 1 | -0.846030 | 5.422756 | 4.428794  |
| 1 | 0.535414  | 1.738953 | 2.664878  |
| 1 | -0.714789 | 4.398680 | 6.651295  |
| 1 | 0.621659  | 0.717803 | 4.894360  |
| 1 | 0.011768  | 2.039379 | 6.903937  |
| 6 | -2.130211 | 5.144598 | 1.096407  |
| 6 | -2.476154 | 5.498122 | -0.220641 |
| 6 | -3.152672 | 5.190075 | 2.061340  |
| 6 | -3.769176 | 5.891112 | -0.555892 |
| 6 | -4.446603 | 5.590572 | 1.737775  |
| 6 | -4.754966 | 5.943959 | 0.426602  |
| 1 | -1.724740 | 5.455078 | -1.006208 |
| 1 | -2.937884 | 4.896298 | 3.087299  |
| 1 | -4.009416 | 6.153990 | -1.581614 |
| 1 | -5.215236 | 5.620949 | 2.504074  |
| 1 | -5.763560 | 6.252821 | 0.169094  |

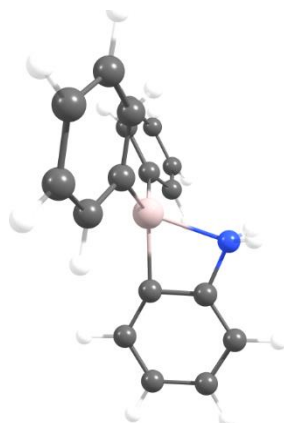

**Figure S52:** Computed structure of H/Ph (CLA)

Data for system: **H/Ph (CLA)**

```
#p m062x/6-31g(d,p) scf=(maxcycles=100) int=ultrafine nosymm freq opt
```

```
--Link1--
```

```
#p m062x/def2tzvp scf=(maxcycles=100) int=ultrafine nosymm guess=read geom=check
SCRF=(Solvent=benzene,SMD)
```

```
SCF Done: E(RM062X) = -992.732733632 A.U.
Zero-point correction=          0.291857 (Hartree/Particle)
Thermal correction to Energy=          0.309372
Thermal correction to Enthalpy=        0.310317
Thermal correction to Gibbs Free Energy= 0.243188
```

Optimized Geometry (XYZ coordinates in Angstrom)

|   |          |          |          |
|---|----------|----------|----------|
| 6 | 2.093851 | 4.291017 | 0.609362 |
|---|----------|----------|----------|

|    |           |          |           |
|----|-----------|----------|-----------|
| 6  | 1.014005  | 5.127829 | 0.318320  |
| 13 | -0.142570 | 4.302731 | 1.708120  |
| 7  | 1.738912  | 3.350257 | 1.684804  |
| 6  | 1.213761  | 6.072204 | -0.694292 |
| 1  | 0.417035  | 6.757001 | -0.971908 |
| 6  | 2.435824  | 6.150377 | -1.359513 |
| 1  | 2.578531  | 6.887356 | -2.144103 |
| 6  | 3.328272  | 4.338222 | -0.028873 |
| 1  | 4.135453  | 3.661681 | 0.238498  |
| 6  | 3.487723  | 5.291193 | -1.030432 |
| 1  | 4.433297  | 5.366289 | -1.557670 |
| 1  | 1.770558  | 2.376971 | 1.386943  |
| 1  | 2.322595  | 3.450051 | 2.513678  |
| 6  | -0.264361 | 5.138407 | 3.482624  |
| 6  | -1.417874 | 5.064914 | 4.280777  |
| 6  | 0.832317  | 5.835831 | 4.018612  |
| 6  | -1.475041 | 5.646594 | 5.546366  |
| 6  | 0.790951  | 6.419211 | 5.282639  |
| 6  | -0.367425 | 6.322635 | 6.050497  |
| 1  | -2.297803 | 4.544825 | 3.905388  |
| 1  | 1.743826  | 5.942852 | 3.428285  |
| 1  | -2.382456 | 5.574121 | 6.138838  |
| 1  | 1.655020  | 6.953090 | 5.667610  |
| 1  | -0.407383 | 6.776984 | 7.035915  |
| 6  | -1.515310 | 3.007464 | 1.166404  |
| 6  | -1.875903 | 2.846001 | -0.182540 |
| 6  | -2.156493 | 2.171542 | 2.098367  |
| 6  | -2.824845 | 1.907642 | -0.583732 |
| 6  | -3.104149 | 1.226725 | 1.710070  |
| 6  | -3.440696 | 1.095348 | 0.364983  |
| 1  | -1.404249 | 3.470070 | -0.940388 |
| 1  | -1.912636 | 2.258373 | 3.156672  |
| 1  | -3.084894 | 1.809120 | -1.633685 |
| 1  | -3.581963 | 0.595417 | 2.453614  |
| 1  | -4.181017 | 0.362823 | 0.057509  |

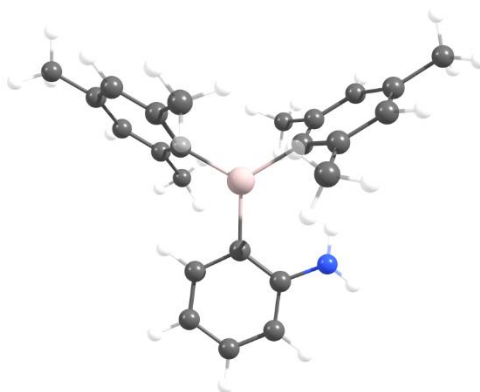

**Figure S53:** Computed structure of H/Mes (FLP)

Data for system: **H/Mes (FLP)**

```
#p m062x/6-31g(d,p) scf=(maxcycles=100) int=ultrafine nosymm freq opt
```

```
--Link1--
```

```
#p m062x/def2tzvp scf=(maxcycles=100) int=ultrafine nosymm guess=read geom=check  
SCRF=(Solvent=benzene,SMD)
```

SCF Done: E(RM062X) = -1228.58189509 A.U.  
 Zero-point correction= 0.457031 (Hartree/Particle)  
 Thermal correction to Energy= 0.485426  
 Thermal correction to Enthalpy= 0.486370  
 Thermal correction to Gibbs Free Energy= 0.395673

Optimized Geometry (XYZ coordinates in Angstrom)

|    |           |           |           |
|----|-----------|-----------|-----------|
| 6  | 1.900469  | 7.094762  | 3.602377  |
| 6  | 0.543278  | 7.274408  | 3.235590  |
| 13 | -0.599642 | 5.959703  | 2.366337  |
| 7  | 2.578442  | 5.923020  | 3.294633  |
| 6  | -0.044908 | 8.520030  | 3.530078  |
| 1  | -1.089108 | 8.678422  | 3.259563  |
| 6  | 0.645475  | 9.550803  | 4.156123  |
| 1  | 0.158815  | 10.496469 | 4.367972  |
| 6  | 2.600783  | 8.133020  | 4.238560  |
| 1  | 3.641975  | 7.982686  | 4.512901  |
| 6  | 1.978086  | 9.341470  | 4.509688  |
| 1  | 2.540595  | 10.128333 | 5.003877  |
| 1  | 3.407530  | 5.734546  | 3.837392  |
| 1  | 2.018834  | 5.100664  | 3.110359  |
| 1  | -1.176143 | 7.029641  | -0.396615 |
| 1  | -2.495401 | 6.406639  | -1.384653 |
| 6  | -1.998807 | 6.302213  | -0.417216 |
| 1  | -1.558785 | 5.298060  | -0.374213 |
| 6  | -2.954332 | 6.528708  | 0.733772  |
| 6  | -2.484508 | 6.423728  | 2.061824  |
| 6  | -4.282956 | 6.848040  | 0.475130  |
| 1  | -4.625904 | 6.929637  | -0.554900 |
| 6  | -5.189053 | 7.072763  | 1.515654  |
| 6  | -4.730609 | 6.965452  | 2.824049  |
| 1  | -5.424015 | 7.135482  | 3.645724  |
| 6  | -3.398661 | 6.643533  | 3.107390  |
| 6  | -2.982716 | 6.491953  | 4.553544  |
| 1  | -1.933353 | 6.766070  | 4.709347  |
| 1  | -3.111164 | 5.456423  | 4.890565  |
| 1  | -3.586668 | 7.122687  | 5.210996  |
| 1  | -7.068197 | 6.723323  | 0.515585  |
| 6  | -6.620314 | 7.435911  | 1.214288  |
| 1  | -7.226390 | 7.448824  | 2.122765  |
| 1  | -6.683491 | 8.426793  | 0.753392  |
| 1  | -1.808511 | 2.206561  | 3.931937  |
| 6  | -1.504656 | 3.175586  | 3.529420  |
| 1  | -2.398291 | 3.670249  | 3.129884  |
| 1  | -1.143069 | 3.777779  | 4.373893  |
| 6  | -0.441043 | 3.033668  | 2.462851  |
| 6  | 0.019748  | 1.768668  | 2.109373  |
| 1  | -0.388699 | 0.889932  | 2.605451  |
| 6  | 1.003358  | 1.603913  | 1.130720  |
| 6  | 1.476531  | 0.224885  | 0.749247  |
| 1  | 1.697026  | -0.376214 | 1.635821  |
| 1  | 0.707967  | -0.306386 | 0.178616  |
| 1  | 2.377906  | 0.270486  | 0.134179  |
| 6  | 1.520238  | 2.739945  | 0.514075  |
| 1  | 2.289357  | 2.627834  | -0.247715 |
| 1  | 0.948639  | 5.571555  | -0.645853 |
| 6  | 1.641198  | 5.219243  | 0.127567  |
| 1  | 1.838018  | 6.048825  | 0.816936  |
| 1  | 2.585012  | 4.977555  | -0.367139 |

|   |          |          |          |
|---|----------|----------|----------|
| 6 | 1.072470 | 4.020458 | 0.852317 |
| 6 | 0.082630 | 4.188103 | 1.840426 |

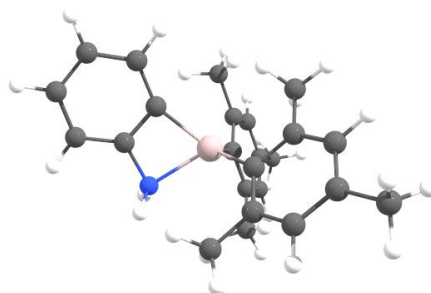

**Figure S54:** Computed structure of H/Mes (CLA)

Data for system: **H/Mes (CLA)**

```
#p m062x/6-31g(d,p) scf=(maxcycles=100) int=ultrafine nosymm freq opt
```

--Link1--

```
#p m062x/def2tzvp scf=(maxcycles=100) int=ultrafine nosymm guess=read geom=check
SCRF=(Solvent=benzene,SMD)
```

SCF Done: E(RM062X) = -1228.59472826 A.U.  
 Zero-point correction= 0.458553 (Hartree/Particle)  
 Thermal correction to Energy= 0.486037  
 Thermal correction to Enthalpy= 0.486981  
 Thermal correction to Gibbs Free Energy= 0.398501

Optimized Geometry (XYZ coordinates in Angstrom)

|    |           |          |           |
|----|-----------|----------|-----------|
| 6  | 1.676060  | 6.838710 | 3.767807  |
| 6  | 0.469083  | 7.519738 | 3.932253  |
| 13 | -0.477229 | 6.393693 | 2.590939  |
| 7  | 1.526210  | 5.761534 | 2.773604  |
| 6  | 0.467900  | 8.566494 | 4.860245  |
| 1  | -0.440705 | 9.135110 | 5.045110  |
| 6  | 1.626393  | 8.894728 | 5.561411  |
| 1  | 1.613528  | 9.711787 | 6.276551  |
| 6  | 2.852496  | 7.131073 | 4.449065  |
| 1  | 3.764812  | 6.564332 | 4.283411  |
| 6  | 2.812774  | 8.184051 | 5.357946  |
| 1  | 3.706361  | 8.452022 | 5.912331  |
| 1  | 2.180639  | 5.841721 | 1.998386  |
| 1  | 1.634816  | 4.836177 | 3.187906  |
| 1  | 1.894677  | 7.035423 | 0.160657  |
| 1  | 1.530231  | 6.388294 | -1.436996 |
| 6  | 1.156569  | 6.459978 | -0.412786 |
| 1  | 1.117503  | 5.444234 | -0.003846 |
| 6  | -0.198739 | 7.130720 | -0.364109 |
| 6  | -0.939733 | 7.185817 | 0.831850  |
| 6  | -0.685933 | 7.713919 | -1.536152 |
| 1  | -0.096414 | 7.650387 | -2.449190 |
| 6  | -1.909290 | 8.378417 | -1.565678 |
| 6  | -2.644668 | 8.447776 | -0.383602 |
| 1  | -3.604139 | 8.962356 | -0.383151 |
| 6  | -2.176332 | 7.867994 | 0.794511  |
| 6  | -3.012538 | 7.978926 | 2.051539  |

|   |           |           |           |
|---|-----------|-----------|-----------|
| 1 | -2.451904 | 8.481034  | 2.851825  |
| 1 | -3.311581 | 6.990396  | 2.422099  |
| 1 | -3.922931 | 8.558520  | 1.882191  |
| 1 | -1.943984 | 8.593034  | -3.713570 |
| 6 | -2.412829 | 9.029406  | -2.828316 |
| 1 | -3.496119 | 8.919156  | -2.925320 |
| 1 | -2.191453 | 10.101983 | -2.830619 |
| 1 | -2.999275 | 5.958548  | 6.148460  |
| 6 | -2.273982 | 6.070917  | 5.338783  |
| 1 | -2.533529 | 6.978522  | 4.782839  |
| 1 | -1.290137 | 6.245504  | 5.785870  |
| 6 | -2.263014 | 4.851826  | 4.442124  |
| 6 | -2.985219 | 3.726213  | 4.844046  |
| 1 | -3.543981 | 3.756826  | 5.777955  |
| 6 | -3.009304 | 2.562085  | 4.078774  |
| 6 | -3.822658 | 1.368250  | 4.508857  |
| 1 | -3.904686 | 1.315851  | 5.597400  |
| 1 | -4.839062 | 1.422121  | 4.104433  |
| 1 | -3.377114 | 0.435772  | 4.153127  |
| 6 | -2.283921 | 2.544090  | 2.889332  |
| 1 | -2.288643 | 1.643648  | 2.277253  |
| 1 | -1.044624 | 4.405768  | 0.496950  |
| 6 | -0.791503 | 3.574238  | 1.164560  |
| 1 | 0.292813  | 3.609711  | 1.336510  |
| 1 | -1.000594 | 2.641864  | 0.634798  |
| 6 | -1.559226 | 3.659128  | 2.466613  |
| 6 | -1.531034 | 4.843236  | 3.235105  |

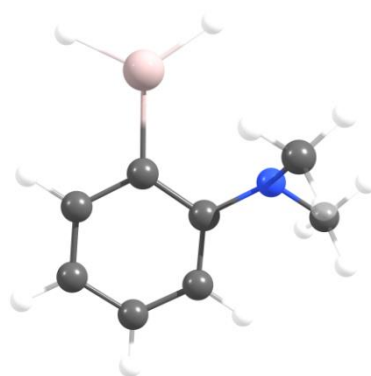

**Figure S55:** Computed structure of CH3/H (FLP)

Data for system: **CH3/H (FLP)**

```
#p m062x/6-31g(d,p) scf=(maxcycles=100) int=ultrafine nosymm freq opt
```

```
--Link1--
```

```
#p m062x/def2tzvp scf=(maxcycles=100) int=ultrafine nosymm guess=read geom=check
SCRF=(Solvent=benzene,SMD)
```

SCF Done: E(RM062X) = -609.188090802 A.U.

Zero-point correction= 0.178361 (Hartree/Particle)

Thermal correction to Energy= 0.189304

Thermal correction to Enthalpy= 0.190248

Thermal correction to Gibbs Free Energy= 0.141966

Optimized Geometry (XYZ coordinates in Angstrom)

|    |           |          |           |
|----|-----------|----------|-----------|
| 6  | 2.827491  | 4.541389 | 2.006278  |
| 6  | 1.520107  | 5.072312 | 1.906246  |
| 13 | 0.148104  | 4.376074 | 0.715460  |
| 7  | 3.230171  | 3.561827 | 1.056342  |
| 6  | 1.129656  | 6.037259 | 2.845389  |
| 1  | 0.124476  | 6.451998 | 2.791103  |
| 6  | 1.976655  | 6.461806 | 3.868744  |
| 1  | 1.645162  | 7.203407 | 4.587961  |
| 6  | 3.674481  | 4.953694 | 3.038455  |
| 1  | 4.675339  | 4.544957 | 3.124818  |
| 6  | 3.245383  | 5.905166 | 3.963319  |
| 1  | 3.918247  | 6.214451 | 4.757699  |
| 1  | -1.275505 | 5.055549 | 0.874288  |
| 1  | 0.354294  | 3.225887 | -0.347433 |
| 6  | 3.419142  | 4.067334 | -0.298754 |
| 1  | 4.373325  | 4.610848 | -0.403685 |
| 1  | 3.409474  | 3.232588 | -1.005198 |
| 1  | 2.613022  | 4.750179 | -0.569194 |
| 6  | 4.338065  | 2.708015 | 1.440418  |
| 1  | 4.169728  | 2.308964 | 2.442789  |
| 1  | 4.392642  | 1.871122 | 0.738851  |
| 1  | 5.313843  | 3.223683 | 1.423705  |

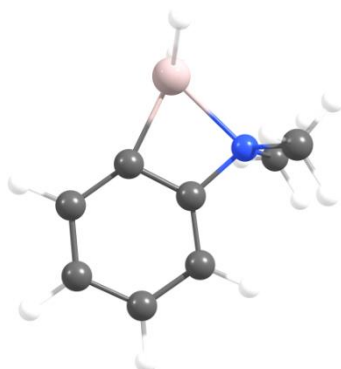

**Figure S56:** Computed structure of CH3/H (CLA)

Data for system: **CH3/H (CLA)**

```
#p m062x/6-31g(d,p) scf=(maxcycles=100) int=ultrafine nosymm freq opt
```

--Link1--

```
#p m062x/def2tzvp scf=(maxcycles=100) int=ultrafine nosymm guess=read geom=check
SCRF=(Solvent=benzene,SMD)
```

SCF Done: E(RM062X) = -609.217685146 A.U.  
 Zero-point correction= 0.179613 (Hartree/Particle)  
 Thermal correction to Energy= 0.189783  
 Thermal correction to Enthalpy= 0.190727  
 Thermal correction to Gibbs Free Energy= 0.144932

Optimized Geometry (XYZ coordinates in Angstrom)

|    |          |          |          |
|----|----------|----------|----------|
| 6  | 2.528905 | 4.594058 | 1.940484 |
| 6  | 1.229496 | 5.084489 | 2.072963 |
| 13 | 0.572889 | 3.983326 | 0.552112 |
| 7  | 2.612142 | 3.625010 | 0.831080 |
| 6  | 1.017272 | 6.015855 | 3.094183 |



|   |           |          |           |
|---|-----------|----------|-----------|
| 1 | 0.030137  | 6.440503 | 3.256005  |
| 6 | 2.067725  | 6.413397 | 3.919635  |
| 1 | 1.890596  | 7.137300 | 4.709493  |
| 6 | 3.604356  | 4.963813 | 2.741402  |
| 1 | 4.599778  | 4.551369 | 2.596269  |
| 6 | 3.353220  | 5.892824 | 3.746720  |
| 1 | 4.159096  | 6.214094 | 4.398796  |
| 1 | 0.415249  | 4.658876 | -0.879473 |
| 1 | -0.180155 | 2.615462 | 0.856379  |
| 6 | 3.503421  | 4.077772 | -0.251663 |
| 1 | 4.547544  | 4.095377 | 0.082688  |
| 1 | 3.407944  | 3.396882 | -1.100717 |
| 1 | 3.204629  | 5.079732 | -0.562321 |
| 6 | 2.973943  | 2.271198 | 1.287308  |
| 1 | 2.292571  | 1.970905 | 2.084352  |
| 1 | 2.875346  | 1.574564 | 0.451491  |
| 1 | 4.004944  | 2.246473 | 1.659751  |

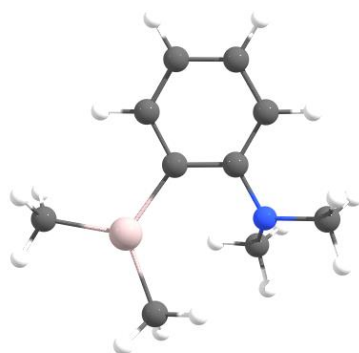

**Figure S57:** Computed structure of CH<sub>3</sub>/CH<sub>3</sub> (FLP)

Data for system: CH<sub>3</sub>/CH<sub>3</sub> (FLP)

```
#p m062x/6-31g(d,p) scf=(maxcycles=100) int=ultrafine nosymm freq opt
```

--Link1--

```
#p m062x/def2tzvp scf=(maxcycles=100) int=ultrafine nosymm guess=read geom=check
SCRF=(Solvent=benzene,SMD)
```

```
SCF Done: E(RM062X) = -687.841581101 A.U.
Zero-point correction= 0.237277 (Hartree/Particle)
Thermal correction to Energy= 0.252058
Thermal correction to Enthalpy= 0.253002
Thermal correction to Gibbs Free Energy= 0.195321
Sum of electronic and zero-point Energies= -687.417906
Sum of electronic and thermal Energies= -687.403126
Sum of electronic and thermal Enthalpies= -687.402181
Sum of electronic and thermal Free Energies= -687.459862
```

Optimized Geometry (XYZ coordinates in Angstrom)

|    |          |          |          |
|----|----------|----------|----------|
| 6  | 3.082380 | 4.611482 | 2.071369 |
| 6  | 1.909546 | 5.402059 | 2.026388 |
| 13 | 0.609503 | 5.414678 | 0.559459 |
| 7  | 3.482663 | 3.924984 | 0.890142 |
| 6  | 1.542679 | 6.080340 | 3.197365 |
| 1  | 0.643818 | 6.695610 | 3.192670 |

|   |           |          |           |
|---|-----------|----------|-----------|
| 6 | 2.268878  | 5.975493 | 4.383823  |
| 1 | 1.950634  | 6.506153 | 5.275239  |
| 6 | 3.808515  | 4.491949 | 3.260454  |
| 1 | 4.705002  | 3.882885 | 3.299379  |
| 6 | 3.397251  | 5.167232 | 4.408640  |
| 1 | 3.975262  | 5.063475 | 5.322235  |
| 6 | 3.927930  | 4.786589 | -0.197929 |
| 1 | 4.956476  | 5.151687 | -0.037180 |
| 1 | 3.895658  | 4.233789 | -1.141808 |
| 1 | 3.275327  | 5.655749 | -0.288849 |
| 6 | 4.394816  | 2.811459 | 1.063727  |
| 1 | 4.027237  | 2.148251 | 1.849440  |
| 1 | 4.439537  | 2.247712 | 0.127568  |
| 1 | 5.423188  | 3.123288 | 1.316389  |
| 6 | 0.736259  | 4.266189 | -1.021204 |
| 1 | 1.206562  | 4.803879 | -1.854068 |
| 1 | 1.355168  | 3.388293 | -0.815433 |
| 1 | -0.244484 | 3.935812 | -1.376410 |
| 6 | -0.903385 | 6.643932 | 0.801935  |
| 1 | -0.578122 | 7.645193 | 1.104670  |
| 1 | -1.503733 | 6.749750 | -0.106039 |
| 1 | -1.576685 | 6.287517 | 1.591050  |

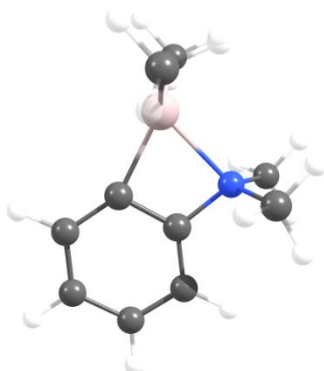

**Figure S58:** Computed structure of CH<sub>3</sub>/CH<sub>3</sub> (CLA)

Data for system: **CH<sub>3</sub>/CH<sub>3</sub> (CLA)**

```
#p m062x/6-31g(d,p) scf=(maxcycles=100) int=ultrafine nosymm freq opt
```

```
--Link1--
```

```
#p m062x/def2tzvp scf=(maxcycles=100) int=ultrafine nosymm guess=read geom=check
SCRF=(Solvent=benzene,SMD)
```

SCF Done: E(RM062X) = -687.866664636 A.U.

Zero-point correction= 0.237694 (Hartree/Particle)

Thermal correction to Energy= 0.252102

Thermal correction to Enthalpy= 0.253046

Thermal correction to Gibbs Free Energy= 0.197502

Optimized Geometry (XYZ coordinates in Angstrom)

|    |          |          |          |
|----|----------|----------|----------|
| 6  | 2.914293 | 5.035880 | 2.155006 |
| 6  | 1.909844 | 6.005524 | 2.130401 |
| 13 | 1.068293 | 5.226872 | 0.494384 |

|   |           |          |           |
|---|-----------|----------|-----------|
| 7 | 2.760587  | 4.087680 | 1.036926  |
| 6 | 1.953492  | 6.964481 | 3.148723  |
| 1 | 1.204667  | 7.751054 | 3.195182  |
| 6 | 2.953925  | 6.929478 | 4.119029  |
| 1 | 2.973978  | 7.680943 | 4.902874  |
| 6 | 3.929820  | 4.964521 | 3.103418  |
| 1 | 4.689145  | 4.186728 | 3.076394  |
| 6 | 3.937237  | 5.936869 | 4.099024  |
| 1 | 4.709140  | 5.923830 | 4.861912  |
| 6 | 3.895883  | 4.126360 | 0.100402  |
| 1 | 4.807446  | 3.736759 | 0.569920  |
| 1 | 3.656808  | 3.520039 | -0.776914 |
| 1 | 4.064161  | 5.157089 | -0.214214 |
| 6 | 2.497992  | 2.712190 | 1.491497  |
| 1 | 1.655224  | 2.719765 | 2.183903  |
| 1 | 2.244592  | 2.092308 | 0.627783  |
| 1 | 3.376431  | 2.288526 | 1.993544  |
| 6 | 1.445232  | 6.038147 | -1.263484 |
| 6 | -0.512190 | 4.062342 | 0.685142  |
| 1 | -1.429806 | 4.596151 | 0.412722  |
| 1 | -0.458251 | 3.189744 | 0.022535  |
| 1 | -0.656378 | 3.689529 | 1.704752  |
| 1 | 0.597725  | 6.640634 | -1.609710 |
| 1 | 1.614645  | 5.277239 | -2.035342 |
| 1 | 2.319067  | 6.698293 | -1.258754 |

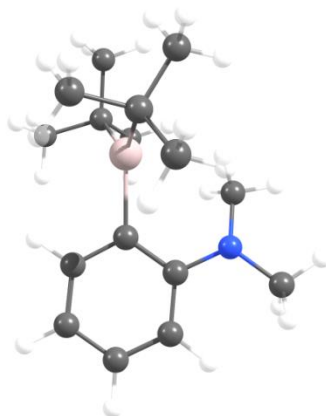

**Figure S59:** Computed structure of CH3/tbut (FLP)

Data for system: **CH3/tbut (FLP)**

```
#p m062x/6-31g(d,p) scf=(maxcycles=100) int=ultrafine nosymm freq opt
```

```
--Link1--
```

```
#p m062x/def2tzvp scf=(maxcycles=100) int=ultrafine nosymm guess=read geom=check
SCRF=(Solvent=benzene,SMD)
```

```
SCF Done: E(RM062X) = -923.671617021 A.U.
Zero-point correction=          0.409212 (Hartree/Particle)
Thermal correction to Energy=      0.431710
Thermal correction to Enthalpy=    0.432654
Thermal correction to Gibbs Free Energy=  0.358440
```

Optimized Geometry (XYZ coordinates in Angstrom)

|    |           |           |           |
|----|-----------|-----------|-----------|
| 6  | -0.442470 | -1.482205 | 0.661032  |
| 6  | -0.603414 | -1.793554 | -0.713233 |
| 7  | -1.092692 | -0.819675 | -1.597183 |
| 13 | -0.672541 | 0.308332  | 1.437170  |
| 6  | 0.768166  | 1.622108  | 1.053954  |
| 6  | -2.072664 | 0.578403  | 2.825888  |
| 6  | 1.735055  | 1.557601  | 2.250273  |
| 1  | 1.258365  | 1.878780  | 3.185113  |
| 1  | 2.134517  | 0.546464  | 2.405121  |
| 1  | 2.599713  | 2.219095  | 2.085559  |
| 6  | 0.287646  | 3.067739  | 0.886642  |
| 1  | -0.219131 | 3.443023  | 1.781508  |
| 1  | 1.141001  | 3.735059  | 0.689834  |
| 1  | -0.403496 | 3.178850  | 0.041153  |
| 6  | 1.523760  | 1.195347  | -0.211735 |
| 1  | 2.375701  | 1.867728  | -0.396425 |
| 1  | 1.915034  | 0.175319  | -0.129640 |
| 6  | -1.685663 | -0.336519 | 4.003084  |
| 1  | -2.408961 | -0.225649 | 4.825759  |
| 1  | -1.684193 | -1.394124 | 3.715158  |
| 1  | -0.696571 | -0.094719 | 4.415031  |
| 6  | -2.147698 | 2.022758  | 3.332323  |
| 1  | -2.889387 | 2.109143  | 4.141374  |
| 1  | -1.188107 | 2.368857  | 3.734502  |
| 1  | -2.445170 | 2.720825  | 2.541305  |
| 6  | -3.458621 | 0.150299  | 2.327330  |
| 1  | -3.456876 | -0.875725 | 1.939945  |
| 1  | -4.191164 | 0.188976  | 3.148275  |
| 1  | -3.831784 | 0.811141  | 1.535098  |
| 6  | -1.960845 | 0.206425  | -1.065971 |
| 1  | -2.512279 | 0.682243  | -1.878232 |
| 1  | -2.695298 | -0.190696 | -0.350304 |
| 1  | -1.395798 | 1.037410  | -0.597768 |
| 6  | -1.284021 | -1.174928 | -2.988362 |
| 1  | -0.345892 | -1.541962 | -3.412614 |
| 1  | -2.055221 | -1.946791 | -3.137416 |
| 1  | -1.570196 | -0.283818 | -3.548545 |
| 6  | 0.071168  | -2.488212 | 1.492583  |
| 1  | 0.214840  | -2.279624 | 2.553236  |
| 6  | 0.422151  | -3.754010 | 1.025922  |
| 1  | 0.818736  | -4.503921 | 1.701859  |
| 6  | -0.261068 | -3.070186 | -1.188453 |
| 1  | -0.399190 | -3.331442 | -2.230425 |
| 6  | 0.250338  | -4.032116 | -0.323263 |
| 1  | 0.506049  | -5.011375 | -0.716856 |
| 1  | 0.884581  | 1.222634  | -1.103110 |

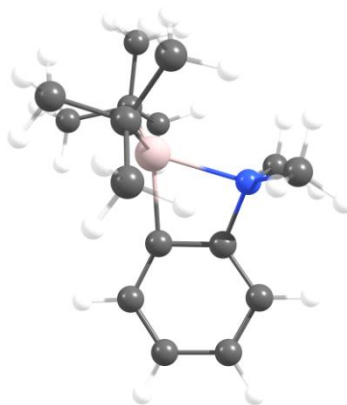

**Figure S60:** Computed structure of CH3/t-but (CLA)

Data for system: **CH3/t-but (CLA)**

```
#p m062x/6-31g(d,p) scf=(maxcycles=100) int=ultrafine nosymm freq opt
```

--Link1--

```
#p m062x/def2tzvp scf=(maxcycles=100) int=ultrafine nosymm guess=read geom=check
SCRF=(Solvent=benzene,SMD)
```

SCF Done: E(RM062X) = -923.691761583 A.U.

Zero-point correction= 0.410490 (Hartree/Particle)

Thermal correction to Energy= 0.432271

Thermal correction to Enthalpy= 0.433215

Thermal correction to Gibbs Free Energy= 0.362155

Optimized Geometry (XYZ coordinates in Angstrom)

|    |           |           |           |
|----|-----------|-----------|-----------|
| 6  | -0.281517 | -1.626297 | 0.772300  |
| 6  | -0.589588 | -1.753300 | -0.582844 |
| 7  | -1.195261 | -0.516217 | -1.113507 |
| 13 | -0.790403 | 0.300227  | 0.837643  |
| 6  | 0.759218  | 1.581164  | 0.741591  |
| 6  | -2.425191 | 0.858391  | 1.859257  |
| 6  | 0.981451  | 2.172383  | 2.145259  |
| 1  | 0.134538  | 2.780572  | 2.481371  |
| 1  | 1.155777  | 1.395939  | 2.901088  |
| 1  | 1.868131  | 2.826071  | 2.146462  |
| 6  | 0.532217  | 2.753941  | -0.222556 |
| 1  | -0.383831 | 3.309095  | 0.012300  |
| 1  | 1.367760  | 3.469878  | -0.166174 |
| 1  | 0.465093  | 2.430401  | -1.267113 |
| 6  | 2.058524  | 0.857844  | 0.358653  |
| 1  | 2.908224  | 1.558628  | 0.372945  |
| 1  | 2.288427  | 0.044826  | 1.056274  |
| 6  | -2.031659 | 0.679768  | 3.338913  |
| 1  | -2.870301 | 0.964141  | 3.993905  |
| 1  | -1.783222 | -0.363950 | 3.569782  |
| 1  | -1.176069 | 1.299272  | 3.627697  |
| 6  | -2.801908 | 2.326918  | 1.625105  |
| 1  | -3.650053 | 2.620598  | 2.263946  |
| 1  | -1.975783 | 3.009363  | 1.853832  |
| 1  | -3.102007 | 2.511245  | 0.585590  |
| 6  | -3.674672 | 0.000385  | 1.625790  |
| 1  | -3.462779 | -1.074110 | 1.697900  |

|   |           |           |           |
|---|-----------|-----------|-----------|
| 1 | -4.440743 | 0.230546  | 2.382984  |
| 1 | -4.131668 | 0.194178  | 0.649763  |
| 6 | -2.609443 | -0.730773 | -1.477084 |
| 1 | -3.087256 | 0.235676  | -1.659317 |
| 1 | -2.682846 | -1.345955 | -2.382672 |
| 1 | -3.118653 | -1.238803 | -0.659796 |
| 6 | -0.472987 | 0.028696  | -2.276042 |
| 1 | 0.575381  | 0.176670  | -2.020613 |
| 1 | -0.542905 | -0.653251 | -3.132266 |
| 1 | -0.915747 | 0.988596  | -2.552366 |
| 6 | 0.275746  | -2.751720 | 1.389981  |
| 1 | 0.543047  | -2.722975 | 2.443359  |
| 6 | 0.501121  | -3.922648 | 0.668088  |
| 1 | 0.934473  | -4.788082 | 1.160608  |
| 6 | -0.377707 | -2.901430 | -1.340244 |
| 1 | -0.634897 | -2.952292 | -2.395344 |
| 6 | 0.179492  | -3.998304 | -0.689414 |
| 1 | 0.363314  | -4.915862 | -1.239162 |
| 1 | 2.028989  | 0.414326  | -0.642962 |

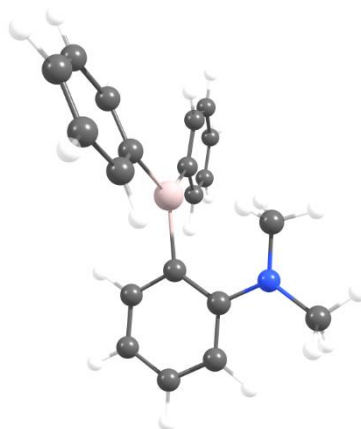

**Figure S61:** Computed structure of CH<sub>3</sub>/Ph (FLP)

Data for system: **CH<sub>3</sub>/Ph (FLP)**

```
#p m062x/6-31g(d,p) scf=(maxcycles=100) int=ultrafine nosymm freq opt
```

```
--Link1--
```

```
#p m062x/def2tzvp scf=(maxcycles=100) int=ultrafine nosymm guess=read geom=check  
SCRF=(Solvent=benzene,SMD)
```

SCF Done: E(RM062X) = -1071.30955329 A.U.

Zero-point correction= 0.347679 (Hartree/Particle)

Thermal correction to Energy= 0.368602

Thermal correction to Enthalpy= 0.369546

Thermal correction to Gibbs Free Energy= 0.293834

Optimized Geometry (XYZ coordinates in Angstrom)

|    |           |          |          |
|----|-----------|----------|----------|
| 6  | 2.460084  | 5.022945 | 1.418247 |
| 6  | 1.363873  | 5.901426 | 1.619602 |
| 13 | -0.497438 | 5.461089 | 2.006069 |
| 7  | 2.296680  | 3.642307 | 1.500370 |
| 6  | 1.618753  | 7.280853 | 1.544637 |

|   |           |          |           |
|---|-----------|----------|-----------|
| 1 | 0.794973  | 7.981783 | 1.692022  |
| 6 | 2.878245  | 7.811213 | 1.282530  |
| 1 | 3.031088  | 8.883674 | 1.232996  |
| 6 | 3.733986  | 5.555584 | 1.137682  |
| 1 | 4.580114  | 4.902599 | 0.964116  |
| 6 | 3.932161  | 6.928465 | 1.077258  |
| 1 | 4.927101  | 7.306405 | 0.861179  |
| 6 | 3.386475  | 2.774511 | 1.107081  |
| 1 | 4.259243  | 2.927441 | 1.750628  |
| 1 | 3.075347  | 1.735653 | 1.216463  |
| 1 | 3.698780  | 2.935984 | 0.065060  |
| 6 | 0.968761  | 3.086580 | 1.564462  |
| 1 | 0.331181  | 3.389363 | 0.715390  |
| 1 | 1.024087  | 1.998006 | 1.546710  |
| 1 | 0.469941  | 3.337882 | 2.516020  |
| 6 | -1.081400 | 5.277684 | 3.862050  |
| 6 | -2.298828 | 4.680915 | 4.235965  |
| 6 | -0.240245 | 5.723547 | 4.897361  |
| 6 | -2.663523 | 4.540997 | 5.572704  |
| 6 | -0.599802 | 5.596241 | 6.236963  |
| 6 | -1.814095 | 5.003943 | 6.574931  |
| 1 | -2.975306 | 4.306048 | 3.470002  |
| 1 | 0.718335  | 6.177550 | 4.650437  |
| 1 | -3.607612 | 4.072516 | 5.834148  |
| 1 | 0.065996  | 5.953752 | 7.016661  |
| 1 | -2.096831 | 4.899675 | 7.618113  |
| 6 | -1.801032 | 5.419782 | 0.551275  |
| 6 | -1.361690 | 5.262628 | -0.775367 |
| 6 | -3.184137 | 5.567604 | 0.755262  |
| 6 | -2.254223 | 5.233977 | -1.843906 |
| 6 | -4.085447 | 5.545230 | -0.306593 |
| 6 | -3.619898 | 5.372948 | -1.607892 |
| 1 | -0.295173 | 5.169477 | -0.978472 |
| 1 | -3.567956 | 5.715597 | 1.762714  |
| 1 | -1.887738 | 5.109634 | -2.858416 |
| 1 | -5.148794 | 5.663731 | -0.121415 |
| 1 | -4.319988 | 5.353558 | -2.437634 |

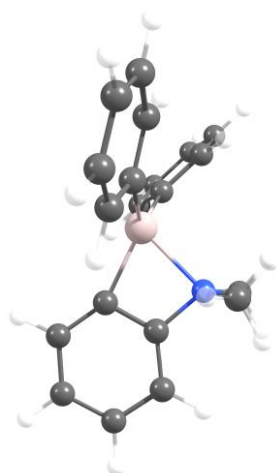

**Figure S62:** Computed structure of CH3/Ph (CLA)

Data for system: **CH3/Ph (CLA)**

#p m062x/6-31g(d,p) scf=(maxcycles=100) int=ultrafine nosymm freq opt

--Link1--

#p m062x/def2tzvp scf=(maxcycles=100) int=ultrafine nosymm guess=read geom=check  
SCRF=(Solvent=benzene,SMD)

SCF Done: E(RM062X) = -1071.33541567 A.U.  
Zero-point correction= 0.348431 (Hartree/Particle)  
Thermal correction to Energy= 0.368661  
Thermal correction to Enthalpy= 0.369606  
Thermal correction to Gibbs Free Energy= 0.297597

Optimized Geometry (XYZ coordinates in Angstrom)

|    |           |          |           |
|----|-----------|----------|-----------|
| 6  | 2.335403  | 5.228999 | 1.408740  |
| 6  | 1.400731  | 6.261683 | 1.512596  |
| 13 | -0.063498 | 5.012699 | 1.996169  |
| 7  | 1.725049  | 3.929516 | 1.741301  |
| 6  | 1.861578  | 7.551293 | 1.227083  |
| 1  | 1.186872  | 8.401385 | 1.283873  |
| 6  | 3.189980  | 7.765169 | 0.863282  |
| 1  | 3.536055  | 8.770932 | 0.644532  |
| 6  | 3.668209  | 5.400668 | 1.048295  |
| 1  | 4.358458  | 4.563508 | 0.981992  |
| 6  | 4.088471  | 6.698589 | 0.773167  |
| 1  | 5.119096  | 6.882880 | 0.487119  |
| 6  | 2.286843  | 3.346785 | 2.974567  |
| 1  | 2.234205  | 4.084792 | 3.776118  |
| 1  | 1.690237  | 2.477327 | 3.261188  |
| 1  | 3.328986  | 3.042152 | 2.819991  |
| 6  | 1.779806  | 2.962234 | 0.631642  |
| 1  | 2.812058  | 2.648326 | 0.435341  |
| 1  | 1.181163  | 2.086973 | 0.895126  |
| 1  | 1.358589  | 3.417025 | -0.265480 |
| 6  | -0.556666 | 4.759805 | 3.885347  |
| 6  | -1.169334 | 3.576671 | 4.336907  |
| 6  | -0.235043 | 5.715625 | 4.864388  |
| 6  | -1.451079 | 3.357903 | 5.684027  |
| 6  | -0.515884 | 5.512442 | 6.214489  |
| 6  | -1.125738 | 4.330377 | 6.626383  |
| 1  | -1.433701 | 2.797898 | 3.621321  |
| 1  | 0.251711  | 6.643665 | 4.567449  |
| 1  | -1.924709 | 2.432687 | 5.999451  |
| 1  | -0.258080 | 6.273306 | 6.945511  |
| 1  | -1.345313 | 4.166773 | 7.677118  |
| 6  | -1.331225 | 4.473496 | 0.591205  |
| 6  | -1.050165 | 4.718532 | -0.765204 |
| 6  | -2.552883 | 3.841191 | 0.878053  |
| 6  | -1.924198 | 4.339030 | -1.781169 |
| 6  | -3.437386 | 3.456471 | -0.128412 |
| 6  | -3.120993 | 3.701565 | -1.461821 |
| 1  | -0.127324 | 5.231942 | -1.036814 |
| 1  | -2.830608 | 3.654634 | 1.914061  |
| 1  | -1.678245 | 4.544874 | -2.818927 |
| 1  | -4.374468 | 2.970066 | 0.126531  |
| 1  | -3.807629 | 3.404598 | -2.248902 |



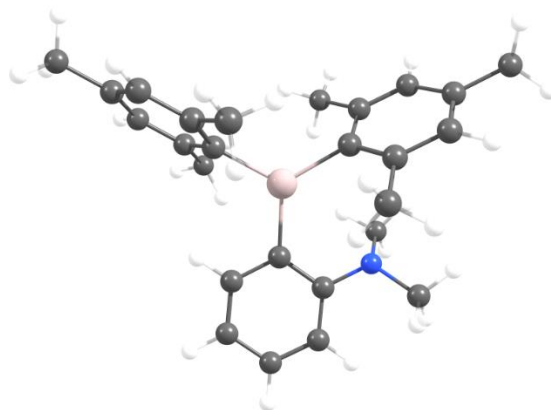

**Figure S63:** Computed structure of CH3/Mes (FLP)

Data for system: **CH3/Mes (FLP)**

```
#p m062x/6-31g(d,p) scf=(maxcycles=100) int=ultrafine nosymm freq opt
```

--Link1--

```
#p m062x/def2tzvp scf=(maxcycles=100) int=ultrafine nosymm guess=read geom=check
SCRF=(Solvent=benzene,SMD)
```

SCF Done: E(RM062X) = -1307.17472382 A.U.  
 Zero-point correction= 0.513680 (Hartree/Particle)  
 Thermal correction to Energy= 0.544621  
 Thermal correction to Enthalpy= 0.545565  
 Thermal correction to Gibbs Free Energy= 0.449632

Optimized Geometry (XYZ coordinates in Angstrom)

|    |           |          |           |
|----|-----------|----------|-----------|
| 6  | 2.465374  | 4.754247 | 1.525349  |
| 6  | 1.361514  | 5.305420 | 0.831565  |
| 13 | -0.493697 | 5.130196 | 1.434414  |
| 7  | 2.246062  | 4.230723 | 2.824972  |
| 6  | 1.588516  | 5.815525 | -0.455307 |
| 1  | 0.750527  | 6.238566 | -1.009480 |
| 6  | 2.842920  | 5.766811 | -1.063078 |
| 1  | 2.986275  | 6.159874 | -2.064234 |
| 6  | 3.720596  | 4.685745 | 0.912663  |
| 1  | 4.563817  | 4.254115 | 1.442204  |
| 6  | 3.902161  | 5.187536 | -0.374850 |
| 1  | 4.884685  | 5.131275 | -0.834258 |
| 6  | 3.153190  | 3.205736 | 3.294473  |
| 1  | 4.131749  | 3.597982 | 3.622093  |
| 1  | 2.689671  | 2.702576 | 4.149712  |
| 1  | 3.318256  | 2.466875 | 2.506456  |
| 6  | 1.946133  | 5.196067 | 3.872884  |
| 1  | 1.340165  | 6.011664 | 3.473244  |
| 1  | 1.376541  | 4.708829 | 4.671529  |
| 1  | 2.865587  | 5.633743 | 4.296872  |
| 6  | -0.982077 | 4.196726 | 3.091753  |
| 6  | -0.645332 | 2.848653 | 3.318058  |
| 6  | -1.568687 | 4.923398 | 4.145291  |
| 6  | -0.875651 | 2.265628 | 4.565113  |
| 6  | -1.795543 | 4.320438 | 5.382774  |
| 6  | -1.452216 | 2.987905 | 5.610147  |
| 1  | -0.601366 | 1.224425 | 4.727781  |

|   |           |          |           |
|---|-----------|----------|-----------|
| 1 | -2.238692 | 4.900943 | 6.189960  |
| 6 | -1.871166 | 5.915667 | 0.271819  |
| 6 | -2.808312 | 5.061089 | -0.349369 |
| 6 | -1.973078 | 7.297371 | 0.031188  |
| 6 | -3.797955 | 5.579118 | -1.178825 |
| 6 | -2.975062 | 7.797002 | -0.806995 |
| 6 | -3.895624 | 6.952440 | -1.419110 |
| 1 | -4.508097 | 4.904798 | -1.654661 |
| 1 | -3.037323 | 8.869029 | -0.984849 |
| 6 | -1.723434 | 2.335793 | 6.941628  |
| 1 | -2.708829 | 1.857933 | 6.947627  |
| 1 | -0.982926 | 1.562953 | 7.162668  |
| 1 | -1.708243 | 3.067954 | 7.752691  |
| 6 | -0.055651 | 2.010117 | 2.208568  |
| 1 | -0.844282 | 1.599172 | 1.567049  |
| 1 | 0.624394  | 2.600263 | 1.582920  |
| 1 | 0.516004  | 1.165704 | 2.603898  |
| 6 | -1.907568 | 6.385740 | 3.954351  |
| 1 | -0.996013 | 6.989903 | 3.840693  |
| 1 | -2.521031 | 6.539946 | 3.058835  |
| 1 | -2.453031 | 6.791903 | 4.809416  |
| 6 | -1.031816 | 8.269713 | 0.706600  |
| 1 | -0.974642 | 9.217015 | 0.164563  |
| 1 | -1.370575 | 8.498711 | 1.724300  |
| 1 | -0.014612 | 7.867260 | 0.776712  |
| 6 | -2.725150 | 3.567301 | -0.121115 |
| 1 | -2.810498 | 3.324723 | 0.945218  |
| 1 | -3.515916 | 3.030800 | -0.650659 |
| 1 | -1.767438 | 3.164870 | -0.477832 |
| 6 | -4.976538 | 7.492859 | -2.319707 |
| 1 | -4.927177 | 7.034494 | -3.311982 |
| 1 | -5.969412 | 7.278763 | -1.912023 |
| 1 | -4.887862 | 8.574621 | -2.441209 |

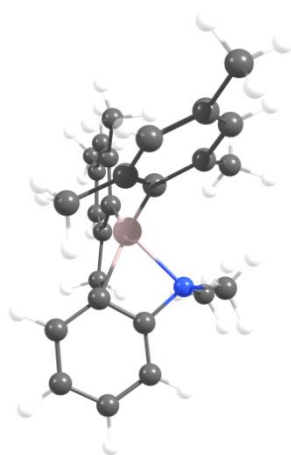

**Figure S64:** Computed structure of CH3/Mes (CLA)

Data for system: **CH3/Mes (CLA)**

#p m062x/6-31g(d,p) scf=(maxcycles=100) int=ultrafine nosymm freq opt

--Link1--

#p m062x/def2tzvp scf=(maxcycles=100) int=ultrafine nosymm guess=read geom=check  
SCRF=(Solvent=benzene,SMD)

SCF Done: E(RM062X) = -1307.18972909 A.U.  
Zero-point correction= 0.515499 (Hartree/Particle)  
Thermal correction to Energy= 0.545548  
Thermal correction to Enthalpy= 0.546492  
Thermal correction to Gibbs Free Energy= 0.454269

Optimized Geometry (XYZ coordinates in Angstrom)

|    |           |           |           |
|----|-----------|-----------|-----------|
| 6  | 2.626332  | 4.930448  | 1.330335  |
| 6  | 1.837409  | 5.462506  | 0.309227  |
| 13 | 0.126164  | 5.106354  | 1.261986  |
| 7  | 1.790702  | 4.327416  | 2.384613  |
| 6  | 2.514958  | 6.042965  | -0.767190 |
| 1  | 1.959038  | 6.476747  | -1.595243 |
| 6  | 3.908587  | 6.083006  | -0.790687 |
| 1  | 4.423912  | 6.540232  | -1.630135 |
| 6  | 4.017084  | 4.952327  | 1.346014  |
| 1  | 4.591267  | 4.527850  | 2.165695  |
| 6  | 4.656007  | 5.547001  | 0.260805  |
| 1  | 5.740031  | 5.591322  | 0.231591  |
| 6  | 1.941591  | 2.856463  | 2.361110  |
| 1  | 2.970513  | 2.581204  | 2.623199  |
| 1  | 1.253314  | 2.409802  | 3.080343  |
| 1  | 1.703682  | 2.484356  | 1.364413  |
| 6  | 2.067886  | 4.832500  | 3.740522  |
| 1  | 1.979601  | 5.917714  | 3.756718  |
| 1  | 1.334409  | 4.404833  | 4.428738  |
| 1  | 3.072913  | 4.543994  | 4.071607  |
| 6  | -0.835198 | 6.627368  | 2.142090  |
| 6  | -0.184252 | 7.753874  | 2.694882  |
| 6  | -2.255889 | 6.604353  | 2.252602  |
| 6  | -0.900097 | 8.736866  | 3.391582  |
| 6  | -2.939594 | 7.601787  | 2.942647  |
| 6  | -2.275675 | 8.671241  | 3.544777  |
| 1  | -0.358176 | 9.584765  | 3.808779  |
| 1  | -4.025472 | 7.553937  | 3.004299  |
| 6  | -0.830445 | 3.427370  | 0.798031  |
| 6  | -0.958589 | 3.011509  | -0.547621 |
| 6  | -1.333892 | 2.567172  | 1.790765  |
| 6  | -1.544355 | 1.788095  | -0.863530 |
| 6  | -1.913200 | 1.338698  | 1.453380  |
| 6  | -2.022372 | 0.929679  | 0.129739  |
| 1  | -1.637140 | 1.492384  | -1.907587 |
| 1  | -2.296907 | 0.693666  | 2.243032  |
| 6  | -3.038134 | 9.718436  | 4.313708  |
| 1  | -3.405163 | 9.315874  | 5.263516  |
| 1  | -2.409172 | 10.583166 | 4.537359  |
| 1  | -3.908992 | 10.065335 | 3.750172  |
| 6  | 1.296081  | 8.040431  | 2.539971  |
| 1  | 1.781921  | 8.158503  | 3.515550  |
| 1  | 1.832698  | 7.281143  | 1.974273  |
| 1  | 1.432705  | 8.987561  | 2.007820  |
| 6  | -3.105847 | 5.536318  | 1.595887  |
| 1  | -2.812227 | 5.357593  | 0.557949  |
| 1  | -3.035723 | 4.573313  | 2.107490  |
| 1  | -4.156463 | 5.836689  | 1.598052  |
| 6  | -1.317582 | 2.944771  | 3.259211  |

|   |           |           |           |
|---|-----------|-----------|-----------|
| 1 | -2.336751 | 3.049937  | 3.646878  |
| 1 | -0.830612 | 2.175998  | 3.869708  |
| 1 | -0.811462 | 3.899248  | 3.442575  |
| 6 | -0.463060 | 3.892942  | -1.674095 |
| 1 | 0.630992  | 3.904879  | -1.720636 |
| 1 | -0.840312 | 3.550368  | -2.640833 |
| 1 | -0.786877 | 4.932664  | -1.542291 |
| 6 | -2.642239 | -0.394536 | -0.236594 |
| 1 | -3.464490 | -0.261457 | -0.946020 |
| 1 | -1.908800 | -1.054606 | -0.710535 |
| 1 | -3.035094 | -0.906129 | 0.645007  |

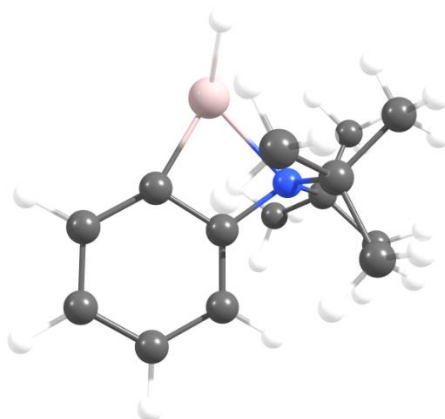

**Figure S65:** Computed structure of t-but/H (CLA)

Data for system: **t-but/H (CLA)**

```
#p m062x/6-31g(d,p) scf=(maxcycles=100) int=ultrafine nosymm freq opt
```

```
--Link1--
```

```
#p m062x/def2tzvp scf=(maxcycles=100) int=ultrafine nosymm guess=read geom=check  
SCRF=(Solvent=benzene,SMD)
```

SCF Done: E(RM062X) = -845.047556986 A.U.

Zero-point correction= 0.351416 (Hartree/Particle)

Thermal correction to Energy= 0.368698

Thermal correction to Enthalpy= 0.369642

Thermal correction to Gibbs Free Energy= 0.309490

Optimized Geometry (XYZ coordinates in Angstrom)

|    |           |           |          |
|----|-----------|-----------|----------|
| 6  | 0.094984  | -0.996965 | 2.484117 |
| 6  | 1.278509  | -0.675377 | 3.150602 |
| 1  | 1.865162  | -1.465021 | 3.610375 |
| 1  | -0.236015 | -2.029541 | 2.434951 |
| 6  | -0.669800 | -0.001193 | 1.882053 |
| 6  | 1.697318  | 0.650318  | 3.240451 |
| 1  | 2.610683  | 0.880839  | 3.782480 |
| 6  | 0.951966  | 1.673689  | 2.649220 |
| 6  | -0.214741 | 1.314793  | 1.967108 |
| 1  | -1.596086 | -0.256959 | 1.377653 |
| 7  | -0.866087 | 2.499944  | 1.357748 |
| 13 | 0.641466  | 3.615482  | 2.455892 |

|   |           |          |           |
|---|-----------|----------|-----------|
| 1 | 0.020480  | 4.315378 | 3.742479  |
| 1 | 1.432889  | 4.610307 | 1.502102  |
| 6 | -0.631900 | 2.498082 | -0.169588 |
| 6 | -2.274750 | 2.802683 | 1.913921  |
| 6 | -3.435260 | 2.139116 | 1.161213  |
| 1 | -3.587015 | 2.559789 | 0.165377  |
| 1 | -3.314149 | 1.056598 | 1.080370  |
| 1 | -4.349540 | 2.324593 | 1.732346  |
| 6 | -2.527260 | 4.321243 | 1.936795  |
| 1 | -1.756053 | 4.848144 | 2.503652  |
| 1 | -2.603477 | 4.762619 | 0.945696  |
| 1 | -3.479547 | 4.499646 | 2.444415  |
| 6 | -2.347449 | 2.314775 | 3.373360  |
| 1 | -3.280529 | 2.687056 | 3.803838  |
| 1 | -2.352086 | 1.226119 | 3.442895  |
| 1 | -1.523782 | 2.699741 | 3.977335  |
| 6 | -1.302282 | 1.339207 | -0.931423 |
| 1 | -1.037928 | 1.451687 | -1.987015 |
| 1 | -0.912708 | 0.372884 | -0.606998 |
| 1 | -2.387199 | 1.325839 | -0.873444 |
| 6 | 0.875936  | 2.338761 | -0.450353 |
| 1 | 1.262404  | 1.387185 | -0.081773 |
| 1 | 1.012571  | 2.359951 | -1.534785 |
| 1 | 1.467424  | 3.151104 | -0.027765 |
| 6 | -1.073753 | 3.830542 | -0.779702 |
| 1 | -0.700578 | 3.879320 | -1.806085 |
| 1 | -2.159768 | 3.930624 | -0.827057 |
| 1 | -0.653051 | 4.676916 | -0.229325 |

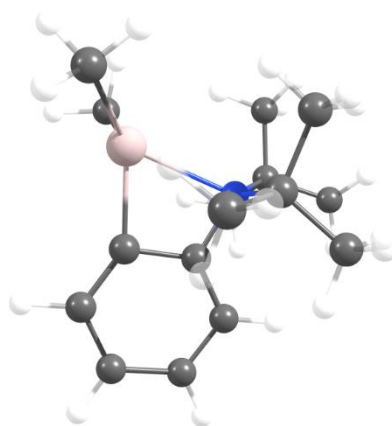

**Figure S66:** Computed structure of t-but/CH3 (CLA)

Data for system: **t-but/CH3 (CLA)**

```
#p m062x/6-31g(d,p) scf=(maxcycles=100) int=ultrafine nosymm freq opt
```

```
--Link1--
```

```
#p m062x/def2tzvp scf=(maxcycles=100) int=ultrafine nosymm guess=read geom=check
SCRF=(Solvent=benzene,SMD)
```

```
SCF Done: E(RM062X) = -923.690098817 A.U.
Zero-point correction=          0.409812 (Hartree/Particle)
Thermal correction to Energy=      0.431155
Thermal correction to Enthalpy=    0.432099
```

Thermal correction to Gibbs Free Energy= 0.363331

Optimized Geometry (XYZ coordinates in Angstrom)

|    |           |           |           |
|----|-----------|-----------|-----------|
| 6  | -0.209632 | -1.071253 | 2.772504  |
| 6  | 1.079619  | -0.913968 | 3.281762  |
| 1  | 1.550984  | -1.736284 | 3.811695  |
| 1  | -0.738894 | -2.008347 | 2.914239  |
| 6  | -0.827792 | -0.029696 | 2.084972  |
| 6  | 1.750900  | 0.297397  | 3.127766  |
| 1  | 2.745142  | 0.406491  | 3.553789  |
| 6  | 1.158539  | 1.364007  | 2.444141  |
| 6  | -0.122444 | 1.163125  | 1.919860  |
| 1  | -1.839247 | -0.152855 | 1.710894  |
| 7  | -0.608454 | 2.352071  | 1.185889  |
| 13 | 1.303853  | 3.290307  | 2.001001  |
| 6  | -0.574290 | 2.085070  | -0.331182 |
| 6  | -1.860405 | 3.001098  | 1.806553  |
| 6  | -3.208319 | 2.528813  | 1.243289  |
| 1  | -3.384753 | 2.870851  | 0.221780  |
| 1  | -3.317025 | 1.442761  | 1.282949  |
| 1  | -3.996069 | 2.959951  | 1.868242  |
| 6  | -1.791868 | 4.530206  | 1.651750  |
| 1  | -0.893888 | 4.938074  | 2.119340  |
| 1  | -1.828686 | 4.858438  | 0.615038  |
| 1  | -2.654151 | 4.969344  | 2.162016  |
| 6  | -1.889568 | 2.694977  | 3.315825  |
| 1  | -2.625387 | 3.355809  | 3.781641  |
| 1  | -2.183693 | 1.663362  | 3.515841  |
| 1  | -0.926043 | 2.870246  | 3.792688  |
| 6  | -1.562045 | 1.019672  | -0.848979 |
| 1  | -1.359618 | 0.886073  | -1.915827 |
| 1  | -1.393830 | 0.053090  | -0.371685 |
| 1  | -2.610294 | 1.289585  | -0.756540 |
| 6  | 0.816259  | 1.540880  | -0.711321 |
| 1  | 1.006617  | 0.566196  | -0.258426 |
| 1  | 0.841526  | 1.419233  | -1.797445 |
| 1  | 1.623232  | 2.217013  | -0.436949 |
| 6  | -0.799690 | 3.386556  | -1.105812 |
| 1  | -0.553560 | 3.213500  | -2.156938 |
| 1  | -1.838944 | 3.719531  | -1.069010 |
| 1  | -0.154240 | 4.186635  | -0.734894 |
| 6  | 2.523756  | 4.092304  | 0.657253  |
| 1  | 3.041889  | 4.931463  | 1.136462  |
| 1  | 3.295997  | 3.396419  | 0.310106  |
| 1  | 2.043340  | 4.498530  | -0.239676 |
| 6  | 1.131808  | 4.566337  | 3.507488  |
| 1  | 2.101209  | 4.515859  | 4.025269  |
| 1  | 1.042244  | 5.600442  | 3.153267  |
| 1  | 0.367116  | 4.412944  | 4.272356  |

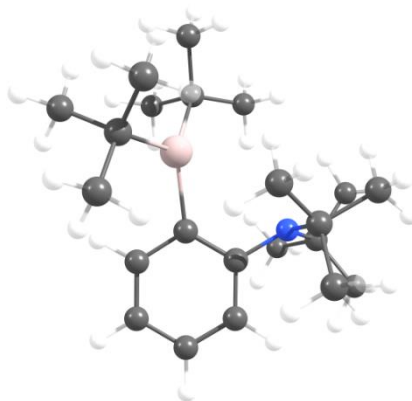

**Figure S67:** Computed structure of t-but/t-but (FLP)

Data for system: **t-but/t-but (FLP)**

```
#p m062x/6-31g(d,p) scf=(maxcycles=100) int=ultrafine nosymm freq opt
```

```
--Link1--
```

```
#p m062x/def2tzvp scf=(maxcycles=100) int=ultrafine nosymm guess=read geom=check
SCRF=(Solvent=benzene,SMD)
```

SCF Done: E(RM062X) = -1159.50235062 A.U.

Zero-point correction= 0.580410 (Hartree/Particle)

Thermal correction to Energy= 0.609917

Thermal correction to Enthalpy= 0.610861

Thermal correction to Gibbs Free Energy= 0.524279

Optimized Geometry (XYZ coordinates in Angstrom)

|    |           |           |           |
|----|-----------|-----------|-----------|
| 6  | -3.857837 | -0.840354 | 0.630990  |
| 6  | -3.268612 | -1.148489 | 1.872583  |
| 13 | -1.619685 | -2.208186 | 2.104875  |
| 7  | -3.064755 | -0.934660 | -0.585400 |
| 6  | -4.034824 | -0.931191 | 3.032581  |
| 1  | -3.604412 | -1.160951 | 4.008227  |
| 6  | -5.335211 | -0.438832 | 2.992562  |
| 1  | -5.888260 | -0.263448 | 3.909963  |
| 6  | -5.196145 | -0.422095 | 0.590262  |
| 1  | -5.673957 | -0.248523 | -0.366783 |
| 6  | -5.925457 | -0.207717 | 1.754992  |
| 1  | -6.952835 | 0.137353  | 1.690774  |
| 6  | -1.900795 | -3.935104 | 3.082921  |
| 6  | 0.224535  | -1.476811 | 1.965602  |
| 6  | 1.337662  | -2.527470 | 2.034335  |
| 6  | 0.336324  | -0.552798 | 3.195160  |
| 6  | 0.433457  | -0.630809 | 0.710009  |
| 6  | -1.171401 | -5.097028 | 2.391142  |
| 6  | -1.307167 | -3.761376 | 4.493938  |
| 6  | -3.375591 | -4.325793 | 3.242031  |
| 1  | -0.235638 | -3.532246 | 4.473514  |
| 1  | -1.427251 | -4.687928 | 5.076587  |
| 1  | -1.272565 | -6.018972 | 2.984770  |
| 1  | -0.099993 | -4.907092 | 2.268647  |
| 1  | -1.589359 | -5.308643 | 1.399298  |
| 1  | -3.957139 | -3.562087 | 3.767504  |
| 1  | -3.868615 | -4.502802 | 2.279258  |

|   |           |           |           |
|---|-----------|-----------|-----------|
| 1 | -3.457695 | -5.259777 | 3.819229  |
| 1 | 0.397149  | -1.244039 | -0.198724 |
| 1 | 1.417509  | -0.136680 | 0.733874  |
| 1 | 2.323405  | -2.036998 | 2.034785  |
| 1 | 1.282429  | -3.140285 | 2.940195  |
| 1 | 1.313459  | -3.205355 | 1.172961  |
| 1 | 0.229211  | -1.099265 | 4.141078  |
| 1 | 1.323047  | -0.065007 | 3.217935  |
| 1 | -0.328438 | 0.148911  | 0.613935  |
| 1 | -1.806757 | -2.963614 | 5.059470  |
| 1 | -0.416603 | 0.245578  | 3.178833  |
| 6 | -3.247006 | -2.240794 | -1.293595 |
| 6 | -2.938589 | 0.365582  | -1.341470 |
| 6 | -4.714500 | -2.580502 | -1.622913 |
| 1 | -4.761811 | -3.533446 | -2.159274 |
| 1 | -5.314443 | -2.676083 | -0.715110 |
| 1 | -5.169821 | -1.815649 | -2.257115 |
| 6 | -2.708745 | -3.351046 | -0.373690 |
| 1 | -3.285931 | -3.429075 | 0.550704  |
| 1 | -2.763484 | -4.325142 | -0.869030 |
| 1 | -1.641804 | -3.167850 | -0.158583 |
| 6 | -2.427842 | -2.347332 | -2.585111 |
| 1 | -1.370879 | -2.139212 | -2.404791 |
| 1 | -2.512649 | -3.372773 | -2.955514 |
| 1 | -2.792177 | -1.689587 | -3.374938 |
| 6 | -2.910426 | 1.518232  | -0.317933 |
| 1 | -2.147298 | 1.339990  | 0.445325  |
| 1 | -2.666051 | 2.445633  | -0.841778 |
| 1 | -3.865188 | 1.660048  | 0.188928  |
| 6 | -1.592533 | 0.451570  | -2.098033 |
| 1 | -0.785772 | 0.021548  | -1.505965 |
| 1 | -1.613337 | -0.035649 | -3.071677 |
| 1 | -1.357614 | 1.504000  | -2.280431 |
| 6 | -4.052866 | 0.668967  | -2.363728 |
| 1 | -3.817534 | 1.611744  | -2.868884 |
| 1 | -4.127128 | -0.100380 | -3.135738 |
| 1 | -5.032382 | 0.789286  | -1.897454 |

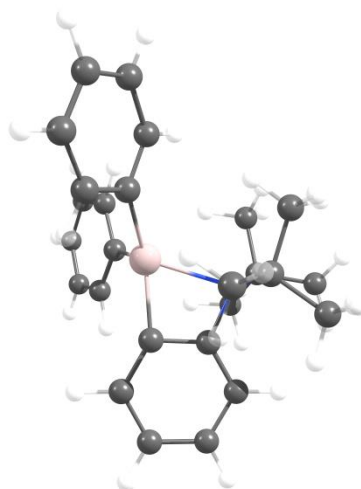

**Figure S68:** Computed structure of t-but/Ph (CLA)

Data for system: t-but/Ph (CLA)



#p m062x/6-31g(d,p) scf=(maxcycles=100) int=ultrafine nosymm freq opt

--Link1--

#p m062x/def2tzvp scf=(maxcycles=100) int=ultrafine nosymm guess=read geom=check  
SCRF=(Solvent=benzene,SMD)

SCF Done: E(RM062X) = -1307.15853194 A.U.  
Zero-point correction= 0.519882 (Hartree/Particle)  
Thermal correction to Energy= 0.547212  
Thermal correction to Enthalpy= 0.548156  
Thermal correction to Gibbs Free Energy= 0.464075

Optimized Geometry (XYZ coordinates in Angstrom)

|    |           |           |           |
|----|-----------|-----------|-----------|
| 6  | -0.636513 | -1.129186 | 2.937741  |
| 6  | 0.728501  | -1.376342 | 2.784894  |
| 1  | 1.128199  | -2.352979 | 3.040633  |
| 1  | -1.289520 | -1.908858 | 3.317040  |
| 6  | -1.169611 | 0.115073  | 2.611704  |
| 6  | 1.576998  | -0.370264 | 2.327414  |
| 1  | 2.641880  | -0.572378 | 2.244619  |
| 6  | 1.073025  | 0.889403  | 1.989237  |
| 6  | -0.304078 | 1.097029  | 2.128514  |
| 1  | -2.229554 | 0.306355  | 2.748856  |
| 7  | -0.698519 | 2.450596  | 1.679864  |
| 13 | 1.510411  | 2.784471  | 1.662575  |
| 6  | -1.344981 | 2.352142  | 0.274604  |
| 6  | -1.381414 | 3.323276  | 2.751275  |
| 6  | -2.916676 | 3.303109  | 2.754690  |
| 1  | -3.357451 | 3.776018  | 1.875998  |
| 1  | -3.313828 | 2.290369  | 2.853908  |
| 1  | -3.249507 | 3.870664  | 3.628415  |
| 6  | -0.907273 | 4.778494  | 2.589967  |
| 1  | 0.163954  | 4.866383  | 2.794883  |
| 1  | -1.115523 | 5.192633  | 1.605133  |
| 1  | -1.422653 | 5.401102  | 3.327228  |
| 6  | -0.942306 | 2.862872  | 4.151867  |
| 1  | -1.259837 | 3.625433  | 4.868134  |
| 1  | -1.403752 | 1.916243  | 4.437222  |
| 1  | 0.139352  | 2.763008  | 4.239141  |
| 6  | -2.686393 | 1.593425  | 0.229148  |
| 1  | -2.970216 | 1.507864  | -0.823711 |
| 1  | -2.585515 | 0.577165  | 0.613074  |
| 1  | -3.506464 | 2.091505  | 0.738865  |
| 6  | -0.412248 | 1.557343  | -0.659822 |
| 1  | -0.296315 | 0.520857  | -0.338694 |
| 1  | -0.867923 | 1.553730  | -1.653475 |
| 1  | 0.571604  | 2.014153  | -0.759051 |
| 6  | -1.533246 | 3.740538  | -0.342817 |
| 1  | -1.862502 | 3.609364  | -1.377153 |
| 1  | -2.297630 | 4.331678  | 0.164126  |
| 1  | -0.593250 | 4.296942  | -0.363700 |
| 6  | 2.132956  | 3.729913  | 0.037572  |
| 6  | 2.947792  | 3.079206  | -0.905098 |
| 6  | 1.907272  | 5.101854  | -0.174468 |
| 6  | 3.499939  | 3.748428  | -1.996041 |
| 6  | 2.445299  | 5.782889  | -1.264829 |
| 6  | 3.246469  | 5.104777  | -2.179648 |
| 1  | 3.155369  | 2.014902  | -0.794328 |

|   |          |          |           |
|---|----------|----------|-----------|
| 1 | 1.287337 | 5.663369 | 0.525600  |
| 1 | 4.125645 | 3.212034 | -2.703407 |
| 1 | 2.243171 | 6.841565 | -1.399185 |
| 1 | 3.670979 | 5.630484 | -3.029407 |
| 6 | 2.379876 | 3.567755 | 3.268184  |
| 6 | 2.659877 | 2.766369 | 4.389838  |
| 6 | 2.880864 | 4.880932 | 3.297818  |
| 6 | 3.374790 | 3.247169 | 5.485115  |
| 6 | 3.591426 | 5.378075 | 4.388801  |
| 6 | 3.837852 | 4.560308 | 5.488464  |
| 1 | 2.306303 | 1.735337 | 4.410208  |
| 1 | 2.726370 | 5.534571 | 2.440693  |
| 1 | 3.572491 | 2.598957 | 6.334064  |
| 1 | 3.959885 | 6.399848 | 4.378418  |
| 1 | 4.394416 | 4.941655 | 6.339363  |

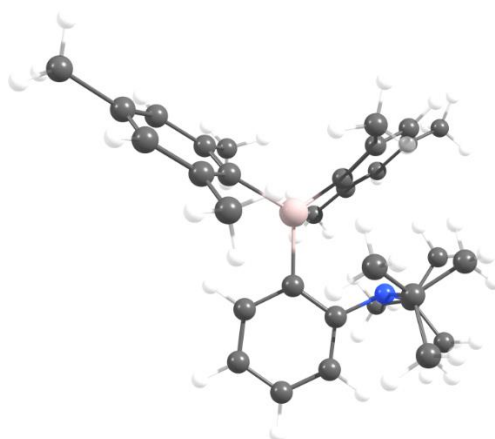

**Figure S69:** Computed structure of t-but/Mes

Data for system: **t-but/Mes**

```
#p m062x/6-31g(d,p) scf=(maxcycles=100) int=ultrafine nosymm freq opt
```

```
--Link1--
```

```
#p m062x/def2tzvp scf=(maxcycles=100) int=ultrafine nosymm guess=read geom=check
SCRF=(Solvent=benzene,SMD)
```

```
SCF Done: E(RM062X) = -1543.00896388 A.U.
Zero-point correction=          0.685557 (Hartree/Particle)
Thermal correction to Energy=    0.723138
Thermal correction to Enthalpy=  0.724083
Thermal correction to Gibbs Free Energy=  0.617562
```

Optimized Geometry (XYZ coordinates in Angstrom)

|    |           |           |           |
|----|-----------|-----------|-----------|
| 6  | -3.637781 | -0.339001 | -2.614194 |
| 6  | -3.791930 | -0.623010 | -1.240943 |
| 13 | -2.612919 | 0.008664  | 0.198651  |
| 7  | -2.514943 | 0.464857  | -3.050873 |
| 6  | -4.870342 | -1.436806 | -0.849685 |
| 1  | -4.981935 | -1.697814 | 0.203035  |
| 6  | -5.795208 | -1.933981 | -1.764345 |
| 1  | -6.623290 | -2.551470 | -1.430723 |
| 6  | -4.562341 | -0.854430 | -3.531697 |
| 1  | -4.442750 | -0.637875 | -4.588310 |

|   |           |           |           |
|---|-----------|-----------|-----------|
| 6 | -5.637777 | -1.634017 | -3.112844 |
| 1 | -6.344081 | -2.013429 | -3.845158 |
| 6 | -1.403007 | -0.362919 | -3.612478 |
| 6 | -2.865635 | 1.809179  | -3.631257 |
| 6 | -1.745102 | -1.142440 | -4.901264 |
| 1 | -0.851612 | -1.670620 | -5.250011 |
| 1 | -2.517728 | -1.892235 | -4.716020 |
| 1 | -2.080988 | -0.489483 | -5.708223 |
| 6 | -1.013150 | -1.410395 | -2.558880 |
| 1 | -1.823073 | -2.113559 | -2.359292 |
| 1 | -0.144481 | -1.979859 | -2.903321 |
| 1 | -0.734894 | -0.915217 | -1.620316 |
| 6 | -0.146907 | 0.478730  | -3.867466 |
| 1 | 0.687515  | -0.196399 | -4.078570 |
| 1 | -0.251022 | 1.140448  | -4.729129 |
| 1 | 0.103677  | 1.078970  | -2.988688 |
| 6 | -4.188606 | 2.276038  | -3.001141 |
| 1 | -4.112507 | 2.254050  | -1.912586 |
| 1 | -4.382005 | 3.305885  | -3.312117 |
| 1 | -5.041336 | 1.664489  | -3.300145 |
| 6 | -1.817426 | 2.873888  | -3.234046 |
| 1 | -1.498965 | 2.730233  | -2.200071 |
| 1 | -0.939381 | 2.872599  | -3.879347 |
| 1 | -2.268482 | 3.867800  | -3.316702 |
| 6 | -3.039069 | 1.851080  | -5.160578 |
| 1 | -2.110761 | 1.623352  | -5.689561 |
| 1 | -3.816194 | 1.164108  | -5.506958 |
| 1 | -3.338276 | 2.862823  | -5.454078 |
| 6 | -1.771044 | 1.785991  | 0.247897  |
| 6 | -0.371563 | 1.930369  | 0.161030  |
| 6 | 0.547867  | 0.727862  | 0.170754  |
| 1 | 0.874718  | 0.458187  | -0.839796 |
| 1 | 0.068475  | -0.152117 | 0.617868  |
| 1 | 1.447949  | 0.930256  | 0.757805  |
| 6 | 0.204300  | 3.198108  | 0.056997  |
| 1 | 1.286904  | 3.288396  | -0.017903 |
| 6 | -0.576098 | 4.353081  | 0.050326  |
| 1 | -0.509970 | 6.478967  | 0.421052  |
| 6 | 0.051462  | 5.712561  | -0.119061 |
| 1 | 1.082131  | 5.722128  | 0.243590  |
| 1 | 0.069820  | 6.000736  | -1.175524 |
| 1 | -2.578501 | 5.107905  | 0.228385  |
| 6 | -1.955966 | 4.215096  | 0.193964  |
| 6 | -2.553686 | 2.958884  | 0.297949  |
| 6 | -4.047003 | 2.901334  | 0.535261  |
| 1 | -4.480507 | 1.929462  | 0.264818  |
| 1 | -4.275632 | 3.077075  | 1.592249  |
| 1 | -4.576208 | 3.661786  | -0.046015 |
| 6 | -2.493212 | -1.168082 | 1.788391  |
| 6 | -2.833588 | -0.659704 | 3.062493  |
| 6 | -3.337992 | 0.757595  | 3.220688  |
| 1 | -3.506199 | 1.005173  | 4.271413  |
| 1 | -4.293992 | 0.893910  | 2.699918  |
| 1 | -2.630649 | 1.485764  | 2.809661  |
| 6 | -2.746146 | -1.464050 | 4.198515  |
| 1 | -3.020418 | -1.050090 | 5.167120  |
| 6 | -2.321756 | -2.789123 | 4.121475  |
| 1 | -1.221213 | -3.490798 | 5.835594  |
| 6 | -2.198055 | -3.635368 | 5.361990  |
| 1 | -2.961444 | -3.372571 | 6.098677  |

|   |           |           |           |
|---|-----------|-----------|-----------|
| 1 | -2.297339 | -4.698144 | 5.128407  |
| 1 | -1.674884 | -4.336508 | 2.784059  |
| 6 | -1.997082 | -3.300224 | 2.867512  |
| 6 | -2.078099 | -2.515320 | 1.716139  |
| 6 | -1.705329 | -3.140326 | 0.391891  |
| 1 | -1.508713 | -4.209847 | 0.496991  |
| 1 | -2.507690 | -3.014948 | -0.342774 |
| 1 | -0.800137 | -2.683048 | -0.025611 |

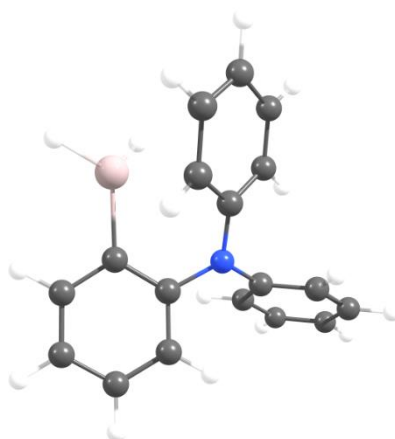

**Figure S70:** Computed structure of Ph/H (FLP)

Data for system: **Ph/H (FLP)**

```
#p m062x/6-31g(d,p) scf=(maxcycles=100) int=ultrafine nosymm freq opt
```

```
--Link1--
```

```
#p m062x/def2tzvp scf=(maxcycles=100) int=ultrafine nosymm guess=read geom=check
SCRF=(Solvent=benzene,SMD)
```

SCF Done: E(RM062X) = -992.683012459 A.U.

Zero-point correction= 0.285211 (Hartree/Particle)

Thermal correction to Energy= 0.301801

Thermal correction to Enthalpy= 0.302745

Thermal correction to Gibbs Free Energy= 0.240757

Optimized Geometry (XYZ coordinates in Angstrom)

|   |           |          |          |
|---|-----------|----------|----------|
| 6 | -3.035517 | 3.112044 | 2.036438 |
| 6 | -2.498245 | 4.291883 | 2.555279 |
| 7 | -2.273484 | 1.906746 | 2.040928 |
| 6 | -3.256021 | 5.457859 | 2.548860 |
| 1 | -2.834052 | 6.371504 | 2.954679 |
| 6 | -4.542852 | 5.459982 | 2.014812 |
| 1 | -5.128873 | 6.372829 | 2.008075 |
| 6 | -4.329299 | 3.108987 | 1.511146 |
| 1 | -4.737071 | 2.182328 | 1.118760 |
| 6 | -5.074426 | 4.283272 | 1.492582 |
| 1 | -6.078590 | 4.274163 | 1.081301 |
| 6 | -1.569829 | 1.554357 | 3.244569 |
| 6 | -0.254214 | 1.060650 | 3.185679 |
| 6 | 0.361591  | 0.780623 | 4.412973 |
| 1 | 1.373751  | 0.379694 | 4.417047 |
| 1 | 0.241934  | 0.765400 | 6.566424 |

|    |           |           |           |
|----|-----------|-----------|-----------|
| 6  | -0.272088 | 0.989254  | 5.637162  |
| 6  | -1.576443 | 1.471756  | 5.654148  |
| 1  | -2.093934 | 1.625095  | 6.595886  |
| 1  | -3.253250 | 2.115385  | 4.463557  |
| 6  | -2.232482 | 1.745595  | 4.459269  |
| 6  | -1.979634 | 1.289325  | 0.828542  |
| 6  | -1.565853 | -0.064145 | 0.794239  |
| 1  | -1.636978 | -0.663792 | 1.696927  |
| 6  | -1.187347 | -0.663112 | -0.417436 |
| 1  | -0.865192 | -1.699441 | -0.404894 |
| 1  | -0.915068 | -0.407620 | -2.536447 |
| 6  | -1.222842 | 0.051901  | -1.604843 |
| 6  | -1.672933 | 1.374689  | -1.575195 |
| 1  | -1.709392 | 1.949838  | -2.495056 |
| 1  | -2.347180 | 3.030392  | -0.391878 |
| 6  | -2.040020 | 1.991615  | -0.390857 |
| 13 | 0.632593  | 0.587841  | 1.469963  |
| 1  | -1.493373 | 4.279864  | 2.965381  |
| 1  | 1.063187  | 1.696492  | 0.425188  |
| 1  | 1.393423  | -0.805428 | 1.519342  |

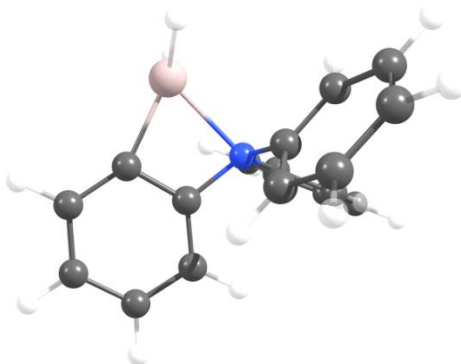

**Figure S71:** Computed structure of Ph/H (CLA)

Data for system: **Ph/H (CLA)**

```
#p m062x/6-31g(d,p) scf=(maxcycles=100) int=ultrafine nosymm freq opt
```

```
--Link1--
```

```
#p m062x/def2tzvp scf=(maxcycles=100) int=ultrafine nosymm guess=read geom=check  
SCRF=(Solvent=benzene,SMD)
```

SCF Done: E(RM062X) = -992.680873596 A.U.

Zero-point correction= 0.285208 (Hartree/Particle)

Thermal correction to Energy= 0.301825

Thermal correction to Enthalpy= 0.302769

Thermal correction to Gibbs Free Energy= 0.240111

Optimized Geometry (XYZ coordinates in Angstrom)

|   |           |          |          |
|---|-----------|----------|----------|
| 6 | -2.248627 | 3.055452 | 1.492431 |
| 6 | -1.204437 | 3.980226 | 1.476800 |
| 7 | -1.940914 | 1.673275 | 1.854400 |
| 6 | -1.466896 | 5.312449 | 1.182236 |
| 1 | -0.648325 | 6.024216 | 1.165394 |

|    |           |           |           |
|----|-----------|-----------|-----------|
| 6  | -2.766650 | 5.732143  | 0.907405  |
| 1  | -2.967111 | 6.772276  | 0.673677  |
| 6  | -3.554051 | 3.470975  | 1.236484  |
| 1  | -4.368787 | 2.756128  | 1.262832  |
| 6  | -3.805486 | 4.808746  | 0.939256  |
| 1  | -4.823643 | 5.124965  | 0.737439  |
| 6  | -1.475360 | 1.560795  | 3.254212  |
| 6  | -0.243532 | 0.916593  | 3.342181  |
| 6  | 0.281871  | 0.751618  | 4.628784  |
| 1  | 1.240048  | 0.259455  | 4.771766  |
| 1  | 0.012730  | 1.094556  | 6.734955  |
| 6  | -0.407365 | 1.226172  | 5.742320  |
| 6  | -1.631701 | 1.886946  | 5.599558  |
| 1  | -2.149320 | 2.263314  | 6.476010  |
| 1  | -3.129634 | 2.590072  | 4.197092  |
| 6  | -2.186181 | 2.069155  | 4.337448  |
| 6  | -2.947238 | 0.702315  | 1.444265  |
| 6  | -3.587906 | -0.136307 | 2.348547  |
| 1  | -3.366841 | -0.071005 | 3.407041  |
| 6  | -4.507133 | -1.076106 | 1.878459  |
| 1  | -5.001270 | -1.731754 | 2.587796  |
| 1  | -5.504074 | -1.909386 | 0.165772  |
| 6  | -4.788967 | -1.176306 | 0.523060  |
| 6  | -4.136807 | -0.334180 | -0.378858 |
| 1  | -4.337887 | -0.411431 | -1.442105 |
| 1  | -2.694105 | 1.247778  | -0.619774 |
| 6  | -3.214922 | 0.595717  | 0.076174  |
| 13 | -0.012706 | 0.745160  | 1.381632  |
| 1  | -0.193748 | 3.652024  | 1.694833  |
| 1  | 0.872480  | 1.833907  | 0.637699  |
| 1  | -0.303563 | -0.630550 | 0.653813  |

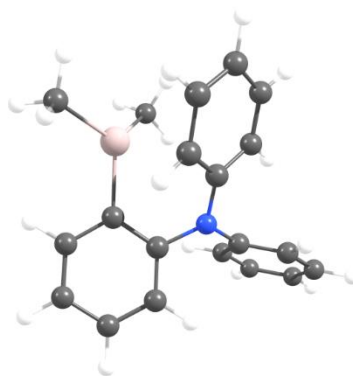

**Figure S72:** Computed structure of Ph/CH<sub>3</sub> (FLP)

Data for system: **Ph/CH<sub>3</sub> (FLP)**

```
#p m062x/6-31g(d,p) scf=(maxcycles=100) int=ultrafine nosymm freq opt
```

```
--Link1--
```

```
#p m062x/def2tzvp scf=(maxcycles=100) int=ultrafine nosymm guess=read geom=check
SCRF=(Solvent=benzene,SMD)
```

SCF Done: E(RM062X) = -1071.33454455 A.U.

Zero-point correction= 0.343406 (Hartree/Particle)

Thermal correction to Energy= 0.364190

Thermal correction to Enthalpy= 0.365134

Thermal correction to Gibbs Free Energy= 0.293782

Optimized Geometry (XYZ coordinates in Angstrom)

|    |           |           |           |
|----|-----------|-----------|-----------|
| 6  | -1.639713 | 4.133724  | 1.525243  |
| 6  | -0.524195 | 4.875398  | 1.919955  |
| 7  | -1.669065 | 2.722535  | 1.720192  |
| 6  | -0.508122 | 6.253553  | 1.734394  |
| 1  | 0.361035  | 6.824475  | 2.044503  |
| 6  | -1.592811 | 6.898158  | 1.143815  |
| 1  | -1.574516 | 7.972785  | 0.996705  |
| 6  | -2.733403 | 4.779678  | 0.944697  |
| 1  | -3.597810 | 4.192252  | 0.650233  |
| 6  | -2.702578 | 6.156020  | 0.746493  |
| 1  | -3.555189 | 6.650939  | 0.292869  |
| 6  | -1.261286 | 2.212777  | 3.001644  |
| 6  | -0.401367 | 1.103142  | 3.084771  |
| 6  | -0.034188 | 0.698538  | 4.375743  |
| 1  | 0.619781  | -0.164465 | 4.493630  |
| 1  | -0.158122 | 1.016626  | 6.506030  |
| 6  | -0.471699 | 1.357536  | 5.524417  |
| 6  | -1.322963 | 2.450313  | 5.399505  |
| 1  | -1.684647 | 2.969308  | 6.281581  |
| 1  | -2.399513 | 3.721962  | 4.031232  |
| 6  | -1.728707 | 2.874869  | 4.138809  |
| 6  | -1.822367 | 1.881991  | 0.620327  |
| 6  | -2.185286 | 0.526889  | 0.794379  |
| 1  | -2.485277 | 0.178429  | 1.777440  |
| 6  | -2.266790 | -0.336662 | -0.306486 |
| 1  | -2.538920 | -1.373180 | -0.132651 |
| 1  | -2.059955 | -0.553617 | -2.438197 |
| 6  | -2.006504 | 0.118695  | -1.590019 |
| 6  | -1.683168 | 1.467134  | -1.766474 |
| 1  | -1.476318 | 1.844825  | -2.763075 |
| 1  | -1.292884 | 3.366923  | -0.855736 |
| 6  | -1.582908 | 2.335988  | -0.692595 |
| 13 | 0.156745  | 0.063705  | 1.480700  |
| 1  | 0.316128  | 4.361946  | 2.376964  |
| 6  | 1.331064  | 0.892294  | 0.144244  |
| 1  | 2.367877  | 0.562405  | 0.277427  |
| 1  | 1.039135  | 0.620481  | -0.876352 |
| 1  | 1.322528  | 1.985389  | 0.207498  |
| 6  | 0.071799  | -1.888910 | 1.704531  |
| 1  | -0.847450 | -2.208909 | 2.207794  |
| 1  | 0.127275  | -2.415164 | 0.745705  |
| 1  | 0.906251  | -2.256205 | 2.313972  |

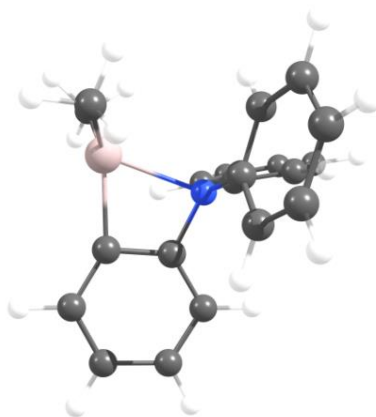

**Figure S73:** Computed structure of Ph/CH3 (CLA)

Data for system: **Ph/CH3 (CLA)**

```
#p m062x/6-31g(d,p) scf=(maxcycles=100) int=ultrafine nosymm freq opt
```

```
--Link1--
```

```
#p m062x/def2tzvp scf=(maxcycles=100) int=ultrafine nosymm guess=read geom=check
SCRF=(Solvent=benzene,SMD)
```

SCF Done: E(RM062X) = -1071.33143154 A.U.

Zero-point correction= 0.343723 (Hartree/Particle)

Thermal correction to Energy= 0.364332

Thermal correction to Enthalpy= 0.365276

Thermal correction to Gibbs Free Energy= 0.294411

Optimized Geometry (XYZ coordinates in Angstrom)

|   |           |          |           |
|---|-----------|----------|-----------|
| 6 | -1.242318 | 3.814563 | 1.102559  |
| 6 | 0.078137  | 4.254256 | 1.221624  |
| 7 | -1.560712 | 2.475780 | 1.578862  |
| 6 | 0.425112  | 5.532373 | 0.804457  |
| 1 | 1.455294  | 5.860001 | 0.896706  |
| 6 | -0.538012 | 6.387286 | 0.271795  |
| 1 | -0.263632 | 7.383992 | -0.056628 |
| 6 | -2.213893 | 4.673357 | 0.591224  |
| 1 | -3.245098 | 4.348674 | 0.516052  |
| 6 | -1.854459 | 5.953333 | 0.172741  |
| 1 | -2.618066 | 6.613032 | -0.226333 |
| 6 | -1.217046 | 2.291122 | 3.001919  |
| 6 | -0.354594 | 1.215091 | 3.205633  |
| 6 | 0.020669  | 0.965885 | 4.531833  |
| 1 | 0.692519  | 0.144115 | 4.765768  |
| 1 | -0.143100 | 1.565019 | 6.591787  |
| 6 | -0.446558 | 1.769795 | 5.569408  |
| 6 | -1.293573 | 2.851409 | 5.309876  |
| 1 | -1.639711 | 3.477353 | 6.126142  |
| 1 | -2.336926 | 3.973149 | 3.774698  |
| 6 | -1.689877 | 3.131068 | 4.006542  |
| 6 | -2.851410 | 1.956242 | 1.164588  |
| 6 | -3.810253 | 1.526513 | 2.075449  |
| 1 | -3.627521 | 1.609697 | 3.140043  |
| 6 | -4.998902 | 0.963092 | 1.607983  |
| 1 | -5.739437 | 0.623045 | 2.324462  |



|    |           |           |           |
|----|-----------|-----------|-----------|
| 1  | -6.161426 | 0.393913  | -0.109206 |
| 6  | -5.236308 | 0.834698  | 0.246149  |
| 6  | -4.270039 | 1.268151  | -0.662774 |
| 1  | -4.436751 | 1.162259  | -1.729608 |
| 1  | -2.315894 | 2.141573  | -0.909114 |
| 6  | -3.081670 | 1.818877  | -0.208461 |
| 13 | -0.147810 | 0.735306  | 1.286318  |
| 1  | 0.824193  | 3.593369  | 1.649826  |
| 6  | 1.415858  | 1.361997  | 0.262549  |
| 1  | 1.879677  | 0.518586  | -0.261487 |
| 1  | 1.125991  | 2.087920  | -0.506897 |
| 1  | 2.194400  | 1.833775  | 0.870330  |
| 6  | -1.175867 | -0.774485 | 0.560221  |
| 1  | -2.153974 | -0.892661 | 1.037765  |
| 1  | -1.347841 | -0.676392 | -0.517429 |
| 1  | -0.626152 | -1.712540 | 0.707482  |

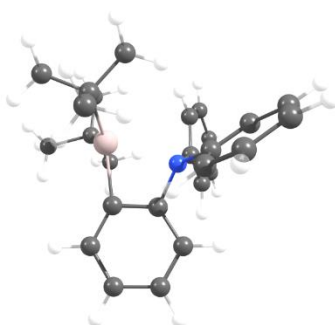

**Figure S74:** Computed structure of Ph/t-but (FLP)

Data for system: **Ph/t-but (FLP)**

```
#p m062x/6-31g(d,p) scf=(maxcycles=100) int=ultrafine nosymm freq opt
```

```
--Link1--
```

```
#p m062x/def2tzvp scf=(maxcycles=100) int=ultrafine nosymm guess=read geom=check
SCRF=(Solvent=benzene,SMD)
```

SCF Done: E(RM062X) = -1307.15852627 A.U.

Zero-point correction= 0.520093 (Hartree/Particle)

Thermal correction to Energy= 0.547339

Thermal correction to Enthalpy= 0.548283

Thermal correction to Gibbs Free Energy= 0.464566

Optimized Geometry (XYZ coordinates in Angstrom)

|    |           |          |          |
|----|-----------|----------|----------|
| 6  | -1.391908 | 4.128578 | 1.086547 |
| 6  | -0.215876 | 4.657044 | 1.631071 |
| 13 | 0.857799  | 3.023646 | 1.370855 |
| 7  | -1.301759 | 2.661988 | 0.915228 |
| 6  | -0.182638 | 6.029490 | 1.896612 |
| 1  | 0.714113  | 6.484000 | 2.310064 |
| 6  | -1.288077 | 6.833199 | 1.625513 |
| 1  | -1.254860 | 7.897245 | 1.839257 |
| 6  | -2.501324 | 4.917368 | 0.779906 |
| 1  | -3.392044 | 4.496256 | 0.323681 |
| 6  | -2.436962 | 6.280130 | 1.058059 |
| 1  | -3.286904 | 6.914520 | 0.827115 |
| 6  | 1.600622  | 1.717284 | 2.660427 |

|   |           |           |           |
|---|-----------|-----------|-----------|
| 6 | 2.002504  | 2.122876  | 3.944961  |
| 6 | 1.879886  | 0.383756  | 2.311543  |
| 6 | 2.637715  | 1.255290  | 4.831940  |
| 6 | 2.506588  | -0.497916 | 3.190289  |
| 6 | 2.889042  | -0.061158 | 4.455823  |
| 1 | 1.809624  | 3.144487  | 4.272352  |
| 1 | 1.596637  | 0.010891  | 1.326438  |
| 1 | 2.934698  | 1.605230  | 5.816292  |
| 1 | 2.699561  | -1.523009 | 2.887576  |
| 1 | 3.380268  | -0.742385 | 5.143801  |
| 6 | 2.129997  | 3.279110  | -0.133880 |
| 6 | 3.081072  | 2.311061  | -0.500886 |
| 6 | 2.214843  | 4.519629  | -0.791700 |
| 6 | 4.039335  | 2.549788  | -1.484226 |
| 6 | 3.171664  | 4.775544  | -1.771892 |
| 6 | 4.084368  | 3.785077  | -2.125122 |
| 1 | 3.086545  | 1.345260  | 0.002094  |
| 1 | 1.509494  | 5.309607  | -0.533148 |
| 1 | 4.755574  | 1.776008  | -1.745315 |
| 1 | 3.207117  | 5.745937  | -2.258757 |
| 1 | 4.831262  | 3.977276  | -2.889594 |
| 6 | -2.092174 | 1.967560  | 2.053052  |
| 6 | -1.484652 | 2.157956  | -0.529861 |
| 6 | -3.615383 | 2.204646  | 2.023482  |
| 1 | -4.128303 | 1.753418  | 1.178709  |
| 1 | -4.028060 | 1.748432  | 2.927893  |
| 1 | -3.856751 | 3.267773  | 2.067247  |
| 6 | -1.819557 | 0.461036  | 2.072293  |
| 1 | -2.247467 | -0.060080 | 1.214348  |
| 1 | -0.748857 | 0.251940  | 2.131590  |
| 1 | -2.287771 | 0.043608  | 2.967826  |
| 6 | -1.632798 | 2.533685  | 3.410671  |
| 1 | -2.168314 | 1.988444  | 4.192311  |
| 1 | -0.568164 | 2.386915  | 3.588095  |
| 1 | -1.871705 | 3.593320  | 3.515105  |
| 6 | -1.094223 | 3.268789  | -1.519620 |
| 1 | -0.124513 | 3.710209  | -1.290849 |
| 1 | -1.023583 | 2.819498  | -2.513843 |
| 1 | -1.839005 | 4.065159  | -1.559188 |
| 6 | -0.522946 | 0.981789  | -0.775867 |
| 1 | -0.670291 | 0.153242  | -0.085532 |
| 1 | -0.682343 | 0.601560  | -1.789185 |
| 1 | 0.519294  | 1.310390  | -0.721386 |
| 6 | -2.905451 | 1.720747  | -0.914123 |
| 1 | -2.900557 | 1.497251  | -1.984795 |
| 1 | -3.235080 | 0.818022  | -0.397999 |
| 1 | -3.637697 | 2.514720  | -0.751048 |

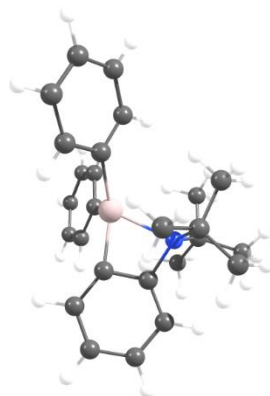

**Figure S75:** Computed structure of Ph/t-but (CLA)

Data for system: **Ph/t-but (CLA)**

```
#p m062x/6-31g(d,p) scf=(maxcycles=100) int=ultrafine nosymm freq opt
```

```
--Link1--
```

```
#p m062x/def2tzvp scf=(maxcycles=100) int=ultrafine nosymm guess=read geom=check
SCRF=(Solvent=benzene,SMD)
```

SCF Done: E(RM062X) = -1307.15672061 A.U.

Zero-point correction= 0.516188 (Hartree/Particle)

Thermal correction to Energy= 0.544357

Thermal correction to Enthalpy= 0.545302

Thermal correction to Gibbs Free Energy= 0.459645

Optimized Geometry (XYZ coordinates in Angstrom)

|    |           |          |           |
|----|-----------|----------|-----------|
| 6  | -1.412373 | 4.225715 | 1.223188  |
| 6  | -0.100491 | 4.655923 | 1.416063  |
| 7  | 0.886142  | 3.572230 | 1.264712  |
| 13 | -1.048987 | 2.293000 | 0.944140  |
| 6  | 0.260816  | 5.980560 | 1.657368  |
| 1  | 1.305264  | 6.269357 | 1.743199  |
| 6  | -0.759326 | 6.920072 | 1.756418  |
| 1  | -0.518093 | 7.960728 | 1.947855  |
| 6  | -2.413618 | 5.200018 | 1.333672  |
| 1  | -3.457445 | 4.927915 | 1.198413  |
| 6  | -2.092048 | 6.528351 | 1.601193  |
| 1  | -2.879152 | 7.272474 | 1.677758  |
| 6  | 1.449120  | 3.042834 | 2.495402  |
| 6  | 1.575629  | 3.802496 | 3.654250  |
| 6  | 1.845602  | 1.703093 | 2.494854  |
| 6  | 2.099504  | 3.218408 | 4.806872  |
| 6  | 2.379469  | 1.131412 | 3.642686  |
| 6  | 2.505933  | 1.888945 | 4.806475  |
| 1  | 1.241582  | 4.832594 | 3.670914  |
| 1  | 1.731837  | 1.117469 | 1.584536  |
| 1  | 2.183345  | 3.812557 | 5.710815  |
| 1  | 2.679501  | 0.088672 | 3.631646  |
| 1  | 2.909702  | 1.440644 | 5.707845  |
| 6  | 1.850205  | 3.817049 | 0.202100  |
| 6  | 3.173631  | 3.376949 | 0.274755  |
| 6  | 1.429738  | 4.516392 | -0.935116 |
| 6  | 4.044917  | 3.606355 | -0.788335 |

|   |           |           |           |
|---|-----------|-----------|-----------|
| 6 | 2.307870  | 4.737933  | -1.988560 |
| 6 | 3.621250  | 4.280421  | -1.926574 |
| 1 | 3.538628  | 2.862837  | 1.154002  |
| 1 | 0.413558  | 4.889257  | -0.992651 |
| 1 | 5.068746  | 3.254931  | -0.711515 |
| 1 | 1.956302  | 5.275895  | -2.862973 |
| 1 | 4.304671  | 4.454574  | -2.750407 |
| 6 | -1.624138 | 1.208773  | 2.530562  |
| 6 | -0.935363 | 1.400139  | -0.847874 |
| 6 | -3.155270 | 1.186731  | 2.323752  |
| 1 | -3.455120 | 0.661402  | 1.409931  |
| 1 | -3.643611 | 0.670938  | 3.164973  |
| 1 | -3.577967 | 2.200178  | 2.287122  |
| 6 | -1.123543 | -0.236228 | 2.613528  |
| 1 | -1.319090 | -0.805470 | 1.698326  |
| 1 | -0.046379 | -0.279898 | 2.809358  |
| 1 | -1.622285 | -0.770112 | 3.438012  |
| 6 | -1.365212 | 1.891808  | 3.879408  |
| 1 | -1.964464 | 1.407830  | 4.666998  |
| 1 | -0.316523 | 1.819164  | 4.182567  |
| 1 | -1.639903 | 2.953922  | 3.866704  |
| 6 | -1.016293 | 2.359216  | -2.042338 |
| 1 | -0.129701 | 2.991948  | -2.121886 |
| 1 | -1.088532 | 1.788065  | -2.981435 |
| 1 | -1.895190 | 3.012762  | -1.989617 |
| 6 | 0.378334  | 0.607409  | -0.938144 |
| 1 | 0.462747  | -0.136904 | -0.134647 |
| 1 | 0.436074  | 0.057566  | -1.890814 |
| 1 | 1.258108  | 1.262981  | -0.891893 |
| 6 | -2.103717 | 0.408903  | -0.987752 |
| 1 | -2.028718 | -0.125035 | -1.947999 |
| 1 | -2.115811 | -0.348784 | -0.197768 |
| 1 | -3.076740 | 0.915441  | -0.979149 |

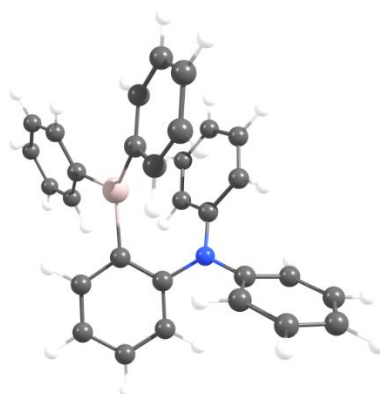

**Figure S76:** Computed structure of Ph/Ph (FLP)

Data for system: **Ph/Ph (FLP)**

```
#p m062x/6-31g(d,p) scf=(maxcycles=100) int=ultrafine nosymm freq opt
```

--Link1--

```
#p m062x/def2tzvp scf=(maxcycles=100) int=ultrafine nosymm guess=read geom=check
SCRF=(Solvent=benzene,SMD)
```

SCF Done: E(RM062X) = -1454.80348261 A.U.

|                                          |                             |
|------------------------------------------|-----------------------------|
| Zero-point correction=                   | 0.453645 (Hartree/Particle) |
| Thermal correction to Energy=            | 0.480394                    |
| Thermal correction to Enthalpy=          | 0.481338                    |
| Thermal correction to Gibbs Free Energy= | 0.393917                    |

Optimized Geometry (XYZ coordinates in Angstrom)

|    |           |           |           |
|----|-----------|-----------|-----------|
| 6  | -1.526782 | 4.512967  | 1.533937  |
| 6  | -0.151255 | 4.716769  | 1.315807  |
| 13 | 1.034318  | 3.332732  | 0.540178  |
| 7  | -2.111278 | 3.215354  | 1.342951  |
| 6  | 0.335955  | 6.010729  | 1.548547  |
| 1  | 1.390367  | 6.216969  | 1.369930  |
| 6  | -0.479051 | 7.051507  | 1.992536  |
| 1  | -0.063318 | 8.038593  | 2.167256  |
| 6  | -2.363516 | 5.549011  | 1.956338  |
| 1  | -3.422500 | 5.360200  | 2.102767  |
| 6  | -1.833988 | 6.812720  | 2.195168  |
| 1  | -2.489227 | 7.612247  | 2.526429  |
| 6  | 1.391183  | 1.686556  | 1.534649  |
| 6  | 0.808944  | 1.520899  | 2.803301  |
| 6  | 2.074231  | 0.582754  | 0.998792  |
| 6  | 0.895275  | 0.319409  | 3.502000  |
| 6  | 2.167916  | -0.626047 | 1.687000  |
| 6  | 1.575434  | -0.759036 | 2.940101  |
| 1  | 0.257706  | 2.348363  | 3.250310  |
| 1  | 2.525504  | 0.655056  | 0.010513  |
| 1  | 0.430432  | 0.220664  | 4.478697  |
| 1  | 2.698866  | -1.464803 | 1.246078  |
| 1  | 1.644160  | -1.699968 | 3.477928  |
| 6  | 2.241445  | 3.997717  | -0.856251 |
| 6  | 3.483237  | 3.403236  | -1.136236 |
| 6  | 1.874448  | 5.104228  | -1.642474 |
| 6  | 4.312463  | 3.878331  | -2.150873 |
| 6  | 2.691885  | 5.585795  | -2.662352 |
| 6  | 3.914473  | 4.969390  | -2.918833 |
| 1  | 3.819903  | 2.555002  | -0.542748 |
| 1  | 0.930534  | 5.613344  | -1.446410 |
| 1  | 5.268671  | 3.399998  | -2.341632 |
| 1  | 2.380898  | 6.442699  | -3.252763 |
| 1  | 4.557050  | 5.341804  | -3.710966 |
| 6  | -3.074021 | 2.760049  | 2.287945  |
| 6  | -4.253364 | 2.156292  | 1.844694  |
| 6  | -2.853204 | 2.921230  | 3.658152  |
| 6  | -5.191440 | 1.700977  | 2.764698  |
| 6  | -3.804408 | 2.479680  | 4.571235  |
| 6  | -4.973306 | 1.863283  | 4.130702  |
| 1  | -4.420686 | 2.044576  | 0.777777  |
| 1  | -1.942216 | 3.406122  | 3.994780  |
| 1  | -6.103006 | 1.230655  | 2.410469  |
| 1  | -3.625377 | 2.610716  | 5.633498  |
| 1  | -5.710470 | 1.515645  | 4.846505  |
| 6  | -1.607839 | 2.324374  | 0.392910  |
| 6  | -1.652171 | 0.932371  | 0.600979  |
| 6  | -0.983388 | 2.800059  | -0.781364 |
| 6  | -1.076899 | 0.067274  | -0.313879 |
| 6  | -0.397411 | 1.905572  | -1.690367 |
| 6  | -0.430170 | 0.539237  | -1.460307 |
| 1  | -2.096862 | 0.543456  | 1.509147  |
| 1  | -1.037158 | 3.857138  | -1.024410 |

|   |           |           |           |
|---|-----------|-----------|-----------|
| 1 | -1.097121 | -0.998063 | -0.107063 |
| 1 | 0.089773  | 2.309958  | -2.572282 |
| 1 | 0.038469  | -0.149520 | -2.153528 |

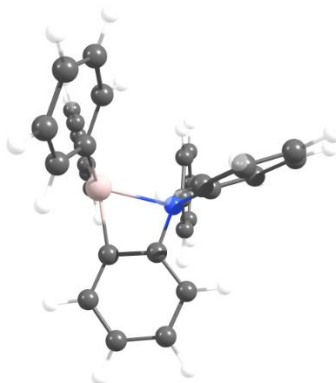

**Figure S77:** Computed structure of Ph/Ph (CLA)

Data for system: **Ph/Ph (CLA)**

```
#p m062x/6-31g(d,p) scf=(maxcycles=100) int=ultrafine nosymm freq opt
```

--Link1--

```
#p m062x/def2tzvp scf=(maxcycles=100) int=ultrafine nosymm guess=read geom=check
SCRF=(Solvent=benzene,SMD)
```

```
SCF Done: E(RM062X) = -1454.79965200 A.U.
Zero-point correction=          0.453862 (Hartree/Particle)
Thermal correction to Energy=          0.480530
Thermal correction to Enthalpy=        0.481474
Thermal correction to Gibbs Free Energy= 0.394315
```

Optimized Geometry (XYZ coordinates in Angstrom)

|    |           |           |           |
|----|-----------|-----------|-----------|
| 6  | -1.331781 | 4.974893  | 1.536396  |
| 6  | -0.077606 | 5.508363  | 1.237920  |
| 13 | 0.705564  | 3.832779  | 0.544734  |
| 7  | -1.473211 | 3.578566  | 1.084457  |
| 6  | 0.140944  | 6.839546  | 1.611483  |
| 1  | 1.096835  | 7.315455  | 1.409326  |
| 6  | -0.854316 | 7.568585  | 2.258902  |
| 1  | -0.670175 | 8.599237  | 2.546638  |
| 6  | -2.342489 | 5.662836  | 2.201709  |
| 1  | -3.288539 | 5.180884  | 2.433407  |
| 6  | -2.087210 | 6.982464  | 2.559707  |
| 1  | -2.848120 | 7.557586  | 3.077541  |
| 6  | 1.728660  | 2.722004  | 1.802598  |
| 6  | 2.430757  | 3.299065  | 2.874893  |
| 6  | 1.729841  | 1.318409  | 1.727503  |
| 6  | 3.100222  | 2.523250  | 3.819535  |
| 6  | 2.388797  | 0.530593  | 2.668816  |
| 6  | 3.077160  | 1.134427  | 3.718043  |
| 1  | 2.444400  | 4.382675  | 2.987642  |
| 1  | 1.192941  | 0.819446  | 0.921030  |
| 1  | 3.635666  | 2.999327  | 4.635846  |
| 1  | 2.364215  | -0.552083 | 2.587073  |
| 1  | 3.592697  | 0.525162  | 4.454267  |
| 6  | 0.904324  | 3.480694  | -1.373725 |

|   |           |          |           |
|---|-----------|----------|-----------|
| 6 | 1.607944  | 2.355905 | -1.835306 |
| 6 | 0.275284  | 4.281301 | -2.342938 |
| 6 | 1.659570  | 2.027470 | -3.189378 |
| 6 | 0.319740  | 3.964612 | -3.697375 |
| 6 | 1.008120  | 2.829433 | -4.122079 |
| 1 | 2.130479  | 1.718972 | -1.123212 |
| 1 | -0.282775 | 5.163032 | -2.031517 |
| 1 | 2.207710  | 1.148707 | -3.516782 |
| 1 | -0.185134 | 4.597333 | -4.421807 |
| 1 | 1.041810  | 2.575332 | -5.177469 |
| 6 | -1.933351 | 2.683716 | 2.140807  |
| 6 | -3.110177 | 1.946051 | 2.022077  |
| 6 | -1.184561 | 2.612152 | 3.317679  |
| 6 | -3.514303 | 1.115888 | 3.066184  |
| 6 | -1.596097 | 1.780893 | 4.350976  |
| 6 | -2.759977 | 1.024175 | 4.229618  |
| 1 | -3.709138 | 2.012856 | 1.121535  |
| 1 | -0.280316 | 3.201559 | 3.419297  |
| 1 | -4.430538 | 0.543763 | 2.962472  |
| 1 | -0.996824 | 1.724019 | 5.253563  |
| 1 | -3.076553 | 0.373069 | 5.037448  |
| 6 | -2.134464 | 3.407247 | -0.200961 |
| 6 | -1.960480 | 2.183510 | -0.855975 |
| 6 | -2.845603 | 4.430070 | -0.816769 |
| 6 | -2.489562 | 1.990298 | -2.121608 |
| 6 | -3.369763 | 4.228844 | -2.095782 |
| 6 | -3.193918 | 3.018222 | -2.751009 |
| 1 | -1.387571 | 1.398698 | -0.368958 |
| 1 | -2.969832 | 5.385604 | -0.320939 |
| 1 | -2.329990 | 1.045153 | -2.629303 |
| 1 | -3.913986 | 5.035182 | -2.576579 |
| 1 | -3.593819 | 2.873210 | -3.748835 |

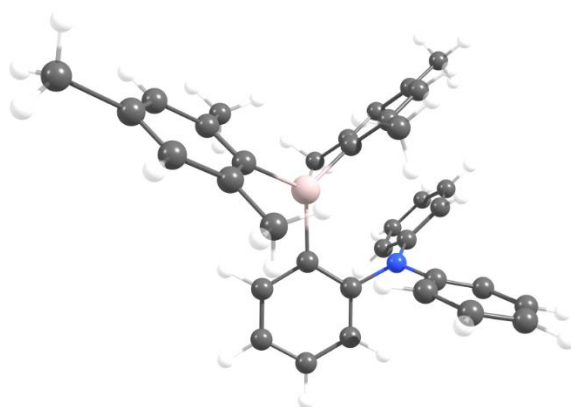

**Figure S78:** Computed structure of Ph/Mes (FLP)

Data for system: **Ph/Mes (FLP)**

```
#p m062x/6-31g(d,p) scf=(maxcycles=100) int=ultrafine nosymm freq opt
```

```
--Link1--
```

```
#p m062x/def2tzvp scf=(maxcycles=100) int=ultrafine nosymm guess=read geom=check
SCRF=(Solvent=benzene,SMD)
```

SCF Done: E(RM062X) = -1690.65716068 A.U.

|                                          |                             |
|------------------------------------------|-----------------------------|
| Zero-point correction=                   | 0.619590 (Hartree/Particle) |
| Thermal correction to Energy=            | 0.656731                    |
| Thermal correction to Enthalpy=          | 0.657675                    |
| Thermal correction to Gibbs Free Energy= | 0.548072                    |

Optimized Geometry (XYZ coordinates in Angstrom)

|    |           |           |           |
|----|-----------|-----------|-----------|
| 6  | -1.329794 | 4.382892  | 1.441887  |
| 6  | -0.208792 | 5.206796  | 1.619912  |
| 13 | 1.637926  | 4.605778  | 1.317968  |
| 7  | -1.157272 | 3.046055  | 0.936164  |
| 6  | -0.437871 | 6.491632  | 2.142775  |
| 1  | 0.411282  | 7.146295  | 2.335463  |
| 6  | -1.717896 | 6.941805  | 2.457903  |
| 1  | -1.863317 | 7.939530  | 2.859857  |
| 6  | -2.616426 | 4.814167  | 1.768257  |
| 1  | -3.453644 | 4.135733  | 1.629440  |
| 6  | -2.809391 | 6.096320  | 2.272689  |
| 1  | -3.810428 | 6.432154  | 2.524559  |
| 6  | 2.212604  | 3.394195  | -0.106974 |
| 6  | 2.257915  | 3.769395  | -1.461460 |
| 6  | 1.863392  | 5.161665  | -1.896956 |
| 1  | 2.734168  | 5.825404  | -1.950860 |
| 1  | 1.136023  | 5.610843  | -1.207876 |
| 1  | 1.393496  | 5.146174  | -2.883970 |
| 6  | 2.690560  | 2.858533  | -2.425627 |
| 1  | 2.709556  | 3.157963  | -3.472768 |
| 6  | 3.074324  | 1.563637  | -2.081471 |
| 1  | 2.685214  | 0.383938  | -3.842612 |
| 6  | 3.506518  | 0.589822  | -3.147700 |
| 1  | 4.335973  | 0.991059  | -3.737562 |
| 1  | 3.827180  | -0.359872 | -2.713756 |
| 1  | 3.302244  | 0.176758  | -0.455857 |
| 6  | 3.017726  | 1.188566  | -0.739018 |
| 6  | 2.594764  | 2.085212  | 0.241248  |
| 6  | 2.492334  | 1.640665  | 1.683596  |
| 1  | 2.894273  | 0.635780  | 1.833637  |
| 1  | 3.046760  | 2.317206  | 2.347994  |
| 1  | 1.442548  | 1.621138  | 2.012590  |
| 6  | 2.948476  | 5.362172  | 2.576742  |
| 6  | 4.049191  | 6.107933  | 2.108179  |
| 6  | 4.217101  | 6.359582  | 0.626066  |
| 1  | 3.383154  | 6.953151  | 0.229341  |
| 1  | 4.249144  | 5.417899  | 0.065625  |
| 1  | 5.135575  | 6.910828  | 0.411306  |
| 6  | 4.981182  | 6.634213  | 3.001765  |
| 1  | 5.821589  | 7.211727  | 2.621004  |
| 6  | 4.858748  | 6.435831  | 4.376658  |
| 1  | 6.717831  | 6.267277  | 5.452782  |
| 6  | 5.893126  | 6.977246  | 5.329542  |
| 1  | 6.318932  | 7.914039  | 4.961522  |
| 1  | 5.464734  | 7.159623  | 6.318071  |
| 1  | 3.658122  | 5.541069  | 5.914444  |
| 6  | 3.769984  | 5.701464  | 4.843688  |
| 6  | 2.822855  | 5.169817  | 3.967706  |
| 6  | 1.657621  | 4.386266  | 4.531570  |
| 1  | 1.744938  | 4.259324  | 5.613183  |
| 1  | 0.706385  | 4.890490  | 4.325749  |
| 1  | 1.600773  | 3.381747  | 4.091697  |
| 6  | -1.588672 | 1.992730  | 1.781332  |



|   |           |           |           |
|---|-----------|-----------|-----------|
| 6 | -1.253612 | 2.042317  | 3.141876  |
| 6 | -2.359411 | 0.921023  | 1.314824  |
| 6 | -1.664756 | 1.036309  | 4.007017  |
| 6 | -2.755483 | -0.086897 | 2.187984  |
| 6 | -2.412438 | -0.040409 | 3.536134  |
| 1 | -0.680022 | 2.886212  | 3.513739  |
| 1 | -2.645069 | 0.880398  | 0.269652  |
| 1 | -1.392508 | 1.094460  | 5.056179  |
| 1 | -3.351675 | -0.910344 | 1.807242  |
| 1 | -2.727213 | -0.828704 | 4.211186  |
| 6 | -1.030440 | 2.868316  | -0.461614 |
| 6 | -0.489444 | 1.677312  | -0.971742 |
| 6 | -1.386553 | 3.884683  | -1.353171 |
| 6 | -0.335040 | 1.506858  | -2.337802 |
| 6 | -1.213293 | 3.705276  | -2.724988 |
| 6 | -0.695011 | 2.519355  | -3.228822 |
| 1 | -0.169457 | 0.900517  | -0.284872 |
| 1 | -1.798616 | 4.813853  | -0.975174 |
| 1 | 0.098486  | 0.582500  | -2.707763 |
| 1 | -1.496839 | 4.506900  | -3.400581 |
| 1 | -0.563660 | 2.384219  | -4.297210 |

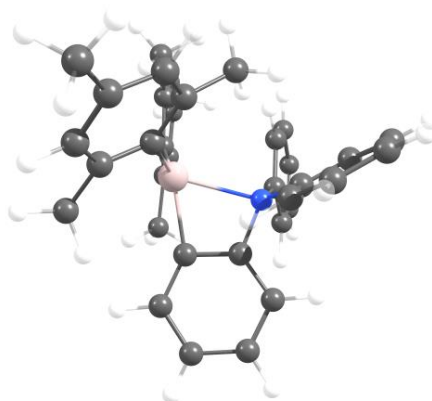

**Figure S79:** Computed structure of Ph/Mes (CLA)

Data for system: **Ph/Mes (CLA)**

```
#p m062x/6-31g(d,p) scf=(maxcycles=100) int=ultrafine nosymm freq opt
```

```
--Link1--
```

```
#p m062x/def2tzvp scf=(maxcycles=100) int=ultrafine nosymm guess=read geom=check
SCRF=(Solvent=benzene,SMD)
```

SCF Done: E(RM062X) = -1690.65746570 A.U.

Zero-point correction= 0.621216 (Hartree/Particle)

Thermal correction to Energy= 0.657366

Thermal correction to Enthalpy= 0.658310

Thermal correction to Gibbs Free Energy= 0.552820

Optimized Geometry (XYZ coordinates in Angstrom)

|    |           |          |          |
|----|-----------|----------|----------|
| 6  | -1.011851 | 4.393229 | 1.558018 |
| 6  | -0.022700 | 5.269761 | 1.992295 |
| 13 | 1.555608  | 4.244570 | 1.356759 |
| 7  | -0.473690 | 3.262407 | 0.782377 |
| 6  | -0.456473 | 6.389676 | 2.714601 |

|   |           |           |           |
|---|-----------|-----------|-----------|
| 1 | 0.264303  | 7.123396  | 3.069818  |
| 6 | -1.806385 | 6.582569  | 2.993065  |
| 1 | -2.124846 | 7.454556  | 3.556386  |
| 6 | -2.369429 | 4.534005  | 1.842922  |
| 1 | -3.089377 | 3.790458  | 1.510855  |
| 6 | -2.761088 | 5.652712  | 2.568089  |
| 1 | -3.809127 | 5.803195  | 2.806220  |
| 6 | 2.403518  | 4.715520  | -0.379579 |
| 6 | 1.880810  | 5.784511  | -1.159682 |
| 6 | 0.951387  | 6.829293  | -0.580151 |
| 1 | 1.303649  | 7.189396  | 0.390494  |
| 1 | -0.060457 | 6.441119  | -0.428630 |
| 1 | 0.880524  | 7.688152  | -1.252379 |
| 6 | 2.225304  | 5.922123  | -2.500998 |
| 1 | 1.799035  | 6.742021  | -3.076886 |
| 6 | 3.105500  | 5.039402  | -3.129376 |
| 1 | 2.552431  | 4.852818  | -5.199961 |
| 6 | 3.409814  | 5.174598  | -4.598198 |
| 1 | 3.622157  | 6.213384  | -4.866344 |
| 1 | 4.268810  | 4.563924  | -4.885594 |
| 1 | 4.413092  | 3.373643  | -2.805732 |
| 6 | 3.683698  | 4.045053  | -2.354285 |
| 6 | 3.353088  | 3.878686  | -1.003479 |
| 6 | 4.057079  | 2.748201  | -0.285439 |
| 1 | 5.121312  | 2.747326  | -0.539095 |
| 1 | 3.972588  | 2.819265  | 0.799840  |
| 1 | 3.657892  | 1.774622  | -0.594332 |
| 6 | 2.399998  | 3.178265  | 2.806005  |
| 6 | 2.848110  | 3.915519  | 3.929219  |
| 6 | 2.737369  | 5.425417  | 3.962317  |
| 1 | 1.735344  | 5.738376  | 4.273890  |
| 1 | 2.932948  | 5.878917  | 2.981519  |
| 1 | 3.456361  | 5.858265  | 4.662232  |
| 6 | 3.387407  | 3.273499  | 5.040661  |
| 1 | 3.731538  | 3.866418  | 5.886905  |
| 6 | 3.498471  | 1.882722  | 5.093470  |
| 1 | 5.137724  | 1.478425  | 6.435560  |
| 6 | 4.085377  | 1.206570  | 6.305899  |
| 1 | 3.558697  | 1.504869  | 7.217386  |
| 1 | 4.027211  | 0.119160  | 6.220413  |
| 1 | 3.165039  | 0.068207  | 4.002117  |
| 6 | 3.073156  | 1.153433  | 3.990009  |
| 6 | 2.542516  | 1.778533  | 2.855845  |
| 6 | 2.165192  | 0.885061  | 1.697099  |
| 1 | 3.042632  | 0.345398  | 1.324659  |
| 1 | 1.413135  | 0.144311  | 1.989097  |
| 1 | 1.754069  | 1.460041  | 0.863852  |
| 6 | -0.853449 | 1.974169  | 1.340150  |
| 6 | -0.749698 | 1.809082  | 2.726116  |
| 6 | -1.294647 | 0.914003  | 0.550959  |
| 6 | -1.056224 | 0.585812  | 3.305313  |
| 6 | -1.596459 | -0.311320 | 1.144278  |
| 6 | -1.475214 | -0.485745 | 2.517576  |
| 1 | -0.410782 | 2.634090  | 3.343563  |
| 1 | -1.402168 | 1.033596  | -0.520016 |
| 1 | -0.955340 | 0.469808  | 4.379383  |
| 1 | -1.935534 | -1.130334 | 0.518196  |
| 1 | -1.709879 | -1.442342 | 2.971981  |
| 6 | -0.589996 | 3.404272  | -0.664296 |
| 6 | 0.287983  | 2.674197  | -1.472251 |

|   |           |          |           |
|---|-----------|----------|-----------|
| 6 | -1.481571 | 4.295323 | -1.253851 |
| 6 | 0.281497  | 2.842745 | -2.848576 |
| 6 | -1.477511 | 4.466792 | -2.639123 |
| 6 | -0.599978 | 3.748334 | -3.439105 |
| 1 | 0.995002  | 1.989618 | -1.012401 |
| 1 | -2.156944 | 4.879608 | -0.640570 |
| 1 | 0.988808  | 2.288109 | -3.456110 |
| 1 | -2.166707 | 5.176390 | -3.085120 |
| 1 | -0.593289 | 3.895008 | -4.514121 |

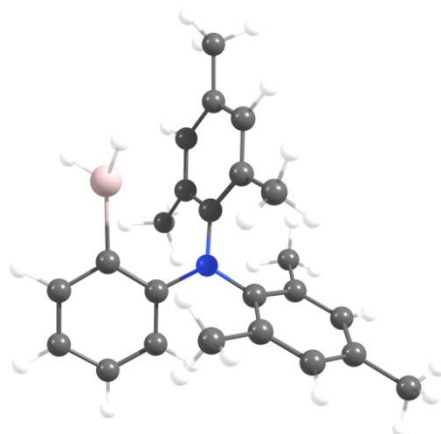

**Figure S80:** Computed structure of Mes/H

Data for system: **Mes/H**

```
#p m062x/6-31g(d,p) scf=(maxcycles=100) int=ultrafine nosymm freq opt
```

```
--Link1--
```

```
#p m062x/def2tzvp scf=(maxcycles=100) int=ultrafine nosymm guess=read geom=check
SCRF=(Solvent=benzene,SMD)
```

SCF Done: E(RM062X) = -1228.54660920 A.U.

Zero-point correction= 0.452829 (Hartree/Particle)

Thermal correction to Energy= 0.479192

Thermal correction to Enthalpy= 0.480136

Thermal correction to Gibbs Free Energy= 0.397769

Optimized Geometry (XYZ coordinates in Angstrom)

|    |           |          |           |
|----|-----------|----------|-----------|
| 6  | -0.087441 | 3.410823 | 0.156441  |
| 6  | 1.282120  | 3.657393 | -0.060009 |
| 13 | 2.402787  | 2.519379 | -1.233373 |
| 7  | -0.678973 | 2.206780 | -0.329100 |
| 6  | 1.796150  | 4.853596 | 0.456962  |
| 1  | 2.846199  | 5.091724 | 0.292394  |
| 6  | 1.017346  | 5.764305 | 1.169475  |
| 1  | 1.455616  | 6.675091 | 1.564085  |
| 6  | -0.895815 | 4.333924 | 0.828844  |
| 1  | -1.956247 | 4.135108 | 0.951967  |
| 6  | -0.336361 | 5.498198 | 1.344563  |
| 1  | -0.970773 | 6.204370 | 1.871639  |
| 6  | -1.845946 | 1.675616 | 0.298146  |
| 6  | -2.972097 | 1.366624 | -0.484050 |
| 6  | -1.853219 | 1.423015 | 1.686297  |
| 6  | -4.083683 | 0.790554 | 0.134079  |

|   |           |           |           |
|---|-----------|-----------|-----------|
| 6 | -2.996277 | 0.869047  | 2.256400  |
| 1 | -4.949788 | 0.545967  | -0.476932 |
| 1 | -2.995990 | 0.665976  | 3.325534  |
| 6 | -4.122494 | 0.540302  | 1.502009  |
| 6 | -0.079630 | 1.507034  | -1.402608 |
| 6 | 0.136130  | 0.106074  | -1.332551 |
| 6 | 0.305592  | 2.210701  | -2.575518 |
| 6 | 0.737468  | -0.534677 | -2.409618 |
| 6 | 0.985980  | 1.514976  | -3.591307 |
| 1 | 0.904574  | -1.607124 | -2.338771 |
| 1 | 1.311197  | 2.078113  | -4.463168 |
| 6 | 1.206976  | 0.145028  | -3.535298 |
| 6 | -0.071458 | 3.654081  | -2.833431 |
| 1 | -0.370180 | 3.759576  | -3.879131 |
| 1 | -0.895932 | 3.971310  | -2.194821 |
| 1 | 0.759900  | 4.341966  | -2.646243 |
| 6 | -0.187508 | -0.705133 | -0.105639 |
| 1 | -1.263409 | -0.853019 | 0.026290  |
| 1 | 0.291007  | -1.683569 | -0.176378 |
| 1 | 0.185574  | -0.207625 | 0.792817  |
| 6 | 1.945449  | -0.581136 | -4.627593 |
| 1 | 2.969097  | -0.809750 | -4.315065 |
| 1 | 1.455659  | -1.527430 | -4.871483 |
| 1 | 2.000391  | 0.021363  | -5.536644 |
| 6 | -3.010439 | 1.636624  | -1.966215 |
| 1 | -2.595157 | 2.620783  | -2.197570 |
| 1 | -2.429148 | 0.899871  | -2.532050 |
| 1 | -4.039874 | 1.603928  | -2.328626 |
| 6 | -5.346006 | -0.046241 | 2.157283  |
| 1 | -5.991166 | -0.536564 | 1.424858  |
| 1 | -5.072122 | -0.781909 | 2.918210  |
| 1 | -5.936016 | 0.732007  | 2.652319  |
| 6 | -0.660078 | 1.698392  | 2.565209  |
| 1 | -0.660873 | 1.017930  | 3.419954  |
| 1 | 0.282045  | 1.583866  | 2.023261  |
| 1 | -0.674735 | 2.725434  | 2.944182  |
| 1 | 3.216026  | 3.365879  | -2.306152 |
| 1 | 2.937829  | 1.093703  | -0.799022 |

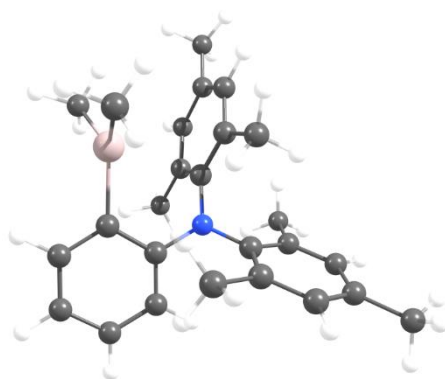

**Figure S81:** Computed structure of Mes/CH3

Data for system: **Mes/CH3**

#p m062x/6-31g(d,p) scf=(maxcycles=100) int=ultrafine nosymm freq opt

--Link1--

#p m062x/def2tzvp scf=(maxcycles=100) int=ultrafine nosymm guess=read geom=check  
SCRF=(Solvent=benzene,SMD)

SCF Done: E(RM062X) = -1307.19896948 A.U.  
Zero-point correction= 0.511529 (Hartree/Particle)  
Thermal correction to Energy= 0.541662  
Thermal correction to Enthalpy= 0.542606  
Thermal correction to Gibbs Free Energy= 0.452648

Optimized Geometry (XYZ coordinates in Angstrom)

|    |           |           |           |
|----|-----------|-----------|-----------|
| 6  | 0.382969  | 2.889724  | 0.488394  |
| 6  | 1.736436  | 2.509329  | 0.436141  |
| 13 | 2.291685  | 1.013700  | -0.745050 |
| 7  | -0.544825 | 2.217285  | -0.354869 |
| 6  | 2.620604  | 3.219697  | 1.258957  |
| 6  | 2.193297  | 4.234668  | 2.115514  |
| 1  | 2.904470  | 4.755507  | 2.748466  |
| 6  | -0.065396 | 3.912416  | 1.328180  |
| 1  | -1.117962 | 4.182660  | 1.333781  |
| 6  | 0.843392  | 4.572634  | 2.148937  |
| 1  | 0.493919  | 5.364573  | 2.804377  |
| 6  | -1.881125 | 1.971422  | 0.074942  |
| 6  | -2.118998 | 1.368910  | 1.329873  |
| 6  | -2.961589 | 2.290525  | -0.768360 |
| 6  | -3.433998 | 1.114374  | 1.711345  |
| 6  | -4.257826 | 1.988590  | -0.347378 |
| 1  | -3.611050 | 0.643478  | 2.676287  |
| 1  | -5.087298 | 2.232222  | -1.007809 |
| 6  | -4.520914 | 1.410629  | 0.890261  |
| 6  | -0.094950 | 1.746794  | -1.620356 |
| 6  | -0.310592 | 0.402591  | -2.007583 |
| 6  | 0.484447  | 2.657171  | -2.550852 |
| 6  | 0.064294  | -0.000241 | -3.295710 |
| 6  | 0.835148  | 2.197731  | -3.813716 |
| 1  | -0.101476 | -1.037177 | -3.578095 |
| 1  | 1.279421  | 2.900793  | -4.515062 |
| 6  | 0.638450  | 0.872884  | -4.210790 |
| 6  | 0.727718  | 4.101428  | -2.207016 |
| 1  | 0.793502  | 4.696735  | -3.119955 |
| 1  | -0.063161 | 4.505908  | -1.571482 |
| 1  | 1.663277  | 4.217172  | -1.647718 |
| 6  | -0.970998 | -0.599253 | -1.097748 |
| 1  | -2.059464 | -0.474633 | -1.102199 |
| 1  | -0.735259 | -1.613850 | -1.425709 |
| 1  | -0.636936 | -0.484507 | -0.066001 |
| 6  | 1.068959  | 0.411670  | -5.577684 |
| 1  | 2.160478  | 0.349785  | -5.637226 |
| 1  | 0.663049  | -0.574845 | -5.810492 |
| 1  | 0.738608  | 1.110791  | -6.350789 |
| 6  | -1.002243 | 0.956213  | 2.254847  |
| 1  | -0.130238 | 0.593185  | 1.703696  |
| 1  | -0.650621 | 1.796070  | 2.863075  |
| 1  | -1.346778 | 0.166250  | 2.925908  |
| 6  | -5.931382 | 1.133244  | 1.341970  |
| 1  | -5.989848 | 0.196723  | 1.902845  |
| 1  | -6.297408 | 1.930550  | 1.997272  |
| 1  | -6.613413 | 1.064726  | 0.491338  |
| 6  | -2.765142 | 2.953730  | -2.107456 |
| 1  | -3.712490 | 3.362400  | -2.465103 |

|   |           |           |           |
|---|-----------|-----------|-----------|
| 1 | -2.042757 | 3.770913  | -2.039856 |
| 1 | -2.390930 | 2.255378  | -2.864514 |
| 6 | 3.567952  | 1.365065  | -2.196577 |
| 1 | 4.589949  | 1.139407  | -1.868020 |
| 1 | 3.369258  | 0.726734  | -3.065031 |
| 1 | 3.553944  | 2.404012  | -2.540038 |
| 6 | 2.174656  | -0.828403 | -0.062493 |
| 1 | 1.497937  | -0.966371 | 0.785802  |
| 1 | 1.876620  | -1.533604 | -0.846810 |
| 1 | 3.171603  | -1.141062 | 0.273603  |
| 1 | 3.680570  | 2.969052  | 1.246341  |

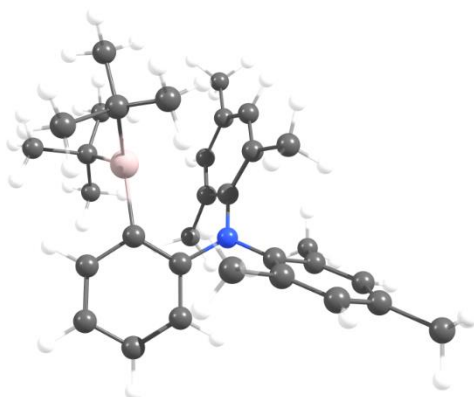

**Figure S82:** Computed structure of Mes/t-but

Data for system: **Mes/t-but**

```
#p m062x/6-31g(d,p) scf=(maxcycles=100) int=ultrafine nosymm freq opt
```

--Link1--

```
#p m062x/def2tzvp scf=(maxcycles=100) int=ultrafine nosymm guess=read geom=check
SCRF=(Solvent=benzene,SMD)
```

SCF Done: E(RM062X) = -1543.01978019 A.U.

Zero-point correction= 0.684315 (Hartree/Particle)

Thermal correction to Energy= 0.721028

Thermal correction to Enthalpy= 0.721972

Thermal correction to Gibbs Free Energy= 0.619477

Optimized Geometry (XYZ coordinates in Angstrom)

|    |           |          |           |
|----|-----------|----------|-----------|
| 6  | 0.416971  | 2.781677 | 0.463510  |
| 6  | 1.780055  | 2.419670 | 0.382234  |
| 13 | 2.653294  | 1.095400 | -0.823613 |
| 7  | -0.568993 | 2.092931 | -0.300783 |
| 6  | 2.664395  | 3.146538 | 1.196603  |
| 1  | 3.727819  | 2.906083 | 1.170234  |
| 6  | 2.255566  | 4.170833 | 2.049490  |
| 1  | 2.977465  | 4.697013 | 2.665150  |
| 6  | -0.003590 | 3.834547 | 1.284464  |
| 1  | -1.053654 | 4.111398 | 1.299568  |
| 6  | 0.909529  | 4.515586 | 2.081091  |
| 1  | 0.563285  | 5.325205 | 2.716244  |
| 6  | -1.910948 | 1.990931 | 0.177861  |
| 6  | -2.158032 | 1.504896 | 1.481439  |

|   |           |           |           |
|---|-----------|-----------|-----------|
| 6 | -2.990771 | 2.325318  | -0.660030 |
| 6 | -3.474265 | 1.390344  | 1.918558  |
| 6 | -4.292917 | 2.167064  | -0.178643 |
| 1 | -3.655001 | 1.008584  | 2.921511  |
| 1 | -5.121369 | 2.421663  | -0.836018 |
| 6 | -4.561420 | 1.714557  | 1.107819  |
| 6 | -0.191509 | 1.505424  | -1.533063 |
| 6 | -0.551612 | 0.177720  | -1.858626 |
| 6 | 0.517889  | 2.291004  | -2.478630 |
| 6 | -0.085918 | -0.365524 | -3.058175 |
| 6 | 0.966033  | 1.687900  | -3.656264 |
| 1 | -0.345186 | -1.396704 | -3.289130 |
| 1 | 1.510325  | 2.298049  | -4.374279 |
| 6 | 0.704309  | 0.351117  | -3.954968 |
| 6 | 0.718521  | 3.773802  | -2.286328 |
| 1 | 0.868037  | 4.253910  | -3.256233 |
| 1 | -0.147810 | 4.224229  | -1.796818 |
| 1 | 1.577824  | 4.004321  | -1.652050 |
| 6 | -1.450594 | -0.660335 | -0.985318 |
| 1 | -2.495349 | -0.345725 | -1.084881 |
| 1 | -1.379529 | -1.710885 | -1.275500 |
| 1 | -1.190990 | -0.576055 | 0.070472  |
| 6 | 1.256958  | -0.294095 | -5.198038 |
| 1 | 2.200466  | -0.806579 | -4.979553 |
| 1 | 0.563422  | -1.034854 | -5.603388 |
| 1 | 1.458870  | 0.449255  | -5.973152 |
| 6 | -1.050319 | 1.062070  | 2.402156  |
| 1 | -0.214800 | 0.629396  | 1.846514  |
| 1 | -0.638865 | 1.901311  | 2.972435  |
| 1 | -1.426355 | 0.318020  | 3.107932  |
| 6 | -5.972875 | 1.588924  | 1.619522  |
| 1 | -6.106354 | 0.663634  | 2.186593  |
| 1 | -6.223508 | 2.419989  | 2.286849  |
| 1 | -6.693516 | 1.592776  | 0.798679  |
| 6 | -2.802026 | 2.833057  | -2.066459 |
| 1 | -3.733874 | 3.267153  | -2.434415 |
| 1 | -2.027319 | 3.600420  | -2.114608 |
| 1 | -2.506346 | 2.034173  | -2.755861 |
| 6 | 4.167101  | 1.767816  | -1.971019 |
| 6 | 2.815820  | -0.785783 | -0.153094 |
| 6 | 4.077106  | 3.254358  | -2.330810 |
| 1 | 3.912631  | 3.887948  | -1.450817 |
| 1 | 5.013315  | 3.586237  | -2.806038 |
| 1 | 3.269221  | 3.450109  | -3.042979 |
| 6 | 5.440250  | 1.580487  | -1.118026 |
| 1 | 5.633849  | 0.530768  | -0.873830 |
| 1 | 6.316676  | 1.947106  | -1.674489 |
| 1 | 5.407189  | 2.143185  | -0.176514 |
| 6 | 4.363865  | 0.975828  | -3.271757 |
| 1 | 5.280468  | 1.310904  | -3.782174 |
| 1 | 4.463672  | -0.100421 | -3.099535 |
| 1 | 3.533169  | 1.125182  | -3.968917 |
| 6 | 1.504101  | -1.485299 | 0.198616  |
| 1 | 0.941180  | -1.761227 | -0.697694 |
| 1 | 1.705746  | -2.410898 | 0.760522  |
| 1 | 0.859447  | -0.859640 | 0.825229  |
| 6 | 3.620364  | -1.723831 | -1.059407 |
| 1 | 4.626276  | -1.347121 | -1.270476 |
| 1 | 3.739553  | -2.707092 | -0.578049 |
| 1 | 3.117176  | -1.888516 | -2.019974 |

|   |          |           |          |
|---|----------|-----------|----------|
| 6 | 3.591840 | -0.578759 | 1.166701 |
| 1 | 3.779178 | -1.551160 | 1.647713 |
| 1 | 4.569889 | -0.103909 | 1.020731 |
| 1 | 3.025470 | 0.033163  | 1.879382 |

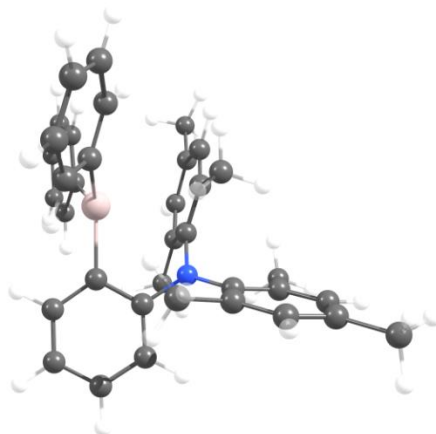

**Figure S83:** Computed structure of Mes/Ph

Data for system: **Mes/Ph**

#p m062x/6-31g(d,p) scf=(maxcycles=100) int=ultrafine nosymm freq opt

--Link1--

#p m062x/def2tzvp scf=(maxcycles=100) int=ultrafine nosymm guess=read geom=check  
SCRF=(Solvent=benzene,SMD)

SCF Done: E(RM062X) = -1690.66852574 A.U.

Zero-point correction= 0.621616 (Hartree/Particle)

Thermal correction to Energy= 0.657836

Thermal correction to Enthalpy= 0.658780

Thermal correction to Gibbs Free Energy= 0.552124

Optimized Geometry (XYZ coordinates in Angstrom)

|    |           |          |           |
|----|-----------|----------|-----------|
| 6  | 0.385559  | 3.316451 | 0.018708  |
| 6  | 1.730463  | 2.906770 | -0.067889 |
| 13 | 2.124908  | 1.007338 | -0.445972 |
| 7  | -0.634319 | 2.358864 | -0.237588 |
| 6  | 2.706661  | 3.887576 | 0.152266  |
| 1  | 3.759593  | 3.617017 | 0.084925  |
| 6  | 2.379146  | 5.205839 | 0.471452  |
| 1  | 3.159644  | 5.939196 | 0.645936  |
| 6  | 0.037169  | 4.633703 | 0.326554  |
| 1  | -1.011193 | 4.914826 | 0.378554  |
| 6  | 1.038654  | 5.570022 | 0.563309  |
| 1  | 0.766261  | 6.592911 | 0.805009  |
| 6  | -1.869566 | 2.384168 | 0.474441  |
| 6  | -1.869027 | 2.475186 | 1.884087  |
| 6  | -3.088201 | 2.272637 | -0.221547 |
| 6  | -3.089528 | 2.480767 | 2.555165  |
| 6  | -4.280348 | 2.253908 | 0.504448  |
| 1  | -3.081651 | 2.545840 | 3.641292  |
| 1  | -5.217029 | 2.161276 | -0.041021 |
| 6  | -4.309196 | 2.369780 | 1.890177  |
| 6  | -0.354940 | 1.332544 | -1.183793 |



|   |           |           |           |
|---|-----------|-----------|-----------|
| 6 | -0.516825 | -0.032592 | -0.844028 |
| 6 | 0.001011  | 1.687064  | -2.518120 |
| 6 | -0.278028 | -1.003802 | -1.829316 |
| 6 | 0.219088  | 0.679976  | -3.447116 |
| 1 | -0.398286 | -2.049679 | -1.555890 |
| 1 | 0.514149  | 0.959183  | -4.456123 |
| 6 | 0.098609  | -0.675041 | -3.124863 |
| 6 | 0.149251  | 3.123352  | -2.940428 |
| 1 | 0.073963  | 3.203906  | -4.026487 |
| 1 | -0.609180 | 3.759991  | -2.478632 |
| 1 | 1.117702  | 3.528901  | -2.628610 |
| 6 | -1.014628 | -0.471392 | 0.508481  |
| 1 | -2.098086 | -0.325468 | 0.582459  |
| 1 | -0.788362 | -1.527720 | 0.665579  |
| 1 | -0.548627 | 0.093711  | 1.317225  |
| 6 | 0.410459  | -1.730977 | -4.149756 |
| 1 | 0.088854  | -2.719318 | -3.814571 |
| 1 | -0.080290 | -1.512578 | -5.102228 |
| 1 | 1.489985  | -1.764041 | -4.331329 |
| 6 | -0.598186 | 2.515986  | 2.693278  |
| 1 | -0.168527 | 3.522471  | 2.728618  |
| 1 | -0.798632 | 2.191133  | 3.716647  |
| 1 | 0.171327  | 1.863653  | 2.271071  |
| 6 | -5.611053 | 2.393072  | 2.648308  |
| 1 | -5.522530 | 1.865392  | 3.601563  |
| 1 | -5.917514 | 3.420703  | 2.870088  |
| 1 | -6.413184 | 1.925556  | 2.072543  |
| 6 | -3.154076 | 2.171302  | -1.723973 |
| 1 | -4.175436 | 2.350886  | -2.065768 |
| 1 | -2.500929 | 2.905834  | -2.200271 |
| 1 | -2.846114 | 1.183998  | -2.086253 |
| 6 | 3.141264  | 0.554701  | -2.060370 |
| 6 | 3.531584  | -0.760700 | -2.360576 |
| 6 | 3.481537  | 1.547778  | -2.995181 |
| 6 | 4.202279  | -1.076771 | -3.541756 |
| 6 | 4.152555  | 1.246578  | -4.177883 |
| 6 | 4.506841  | -0.071848 | -4.456797 |
| 1 | 3.313703  | -1.561270 | -1.655873 |
| 1 | 3.215228  | 2.585108  | -2.795243 |
| 1 | 4.489909  | -2.104088 | -3.747128 |
| 1 | 4.401285  | 2.036111  | -4.881056 |
| 1 | 5.028228  | -0.313290 | -5.378230 |
| 6 | 2.201822  | -0.201751 | 1.101824  |
| 6 | 2.453814  | 0.337578  | 2.374781  |
| 6 | 2.053947  | -1.597593 | 1.023517  |
| 6 | 2.549319  | -0.466649 | 3.510584  |
| 6 | 2.144551  | -2.411678 | 2.149080  |
| 6 | 2.392970  | -1.844486 | 3.398031  |
| 1 | 2.571309  | 1.415479  | 2.486563  |
| 1 | 1.839267  | -2.063611 | 0.061695  |
| 1 | 2.742535  | -0.018447 | 4.480754  |
| 1 | 2.020933  | -3.486818 | 2.056417  |
| 1 | 2.462664  | -2.475615 | 4.278781  |

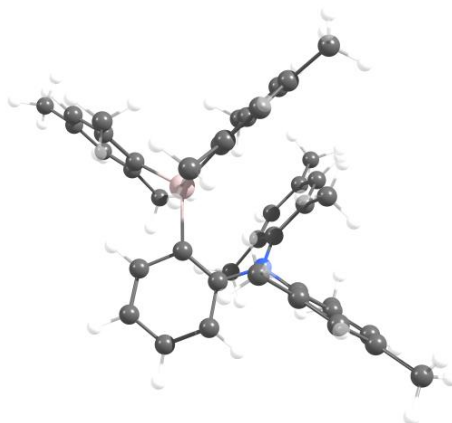

**Figure S84:** Computed structure of Mes/Mes

Data for system: **Mes/Mes**

```
#p m062x/6-31g(d,p) scf=(maxcycles=100) int=ultrafine nosymm freq opt
```

--Link1--

```
#p m062x/def2tzvp scf=(maxcycles=100) int=ultrafine nosymm guess=read geom=check
SCRF=(Solvent=benzene,SMD)
```

SCF Done: E(RM062X) = -1926.52407156 A.U.

Zero-point correction= 0.788584 (Hartree/Particle)

Thermal correction to Energy= 0.834684

Thermal correction to Enthalpy= 0.835628

Thermal correction to Gibbs Free Energy= 0.708546

Optimized Geometry (XYZ coordinates in Angstrom)

|    |           |           |           |
|----|-----------|-----------|-----------|
| 6  | -0.398363 | 3.527422  | 0.535230  |
| 6  | 0.908916  | 3.599496  | 1.066119  |
| 13 | 2.082298  | 2.209781  | 1.797374  |
| 7  | -1.014772 | 2.282540  | 0.242111  |
| 6  | 1.452817  | 4.884710  | 1.252386  |
| 1  | 2.474992  | 4.972756  | 1.622773  |
| 6  | 0.740355  | 6.053399  | 0.992954  |
| 1  | 1.192017  | 7.025022  | 1.162797  |
| 6  | -1.119256 | 4.698794  | 0.267987  |
| 1  | -2.120162 | 4.621406  | -0.146093 |
| 6  | -0.559148 | 5.947795  | 0.508984  |
| 1  | -1.137658 | 6.840525  | 0.291115  |
| 6  | -2.436666 | 2.173544  | 0.362445  |
| 6  | -3.235169 | 1.779388  | -0.726318 |
| 6  | -3.033894 | 2.435471  | 1.613765  |
| 6  | -4.612054 | 1.639827  | -0.531624 |
| 6  | -4.412371 | 2.304833  | 1.747940  |
| 1  | -5.223393 | 1.328331  | -1.375841 |
| 1  | -4.861465 | 2.500499  | 2.719645  |
| 6  | -5.224860 | 1.902802  | 0.688413  |
| 6  | -0.289612 | 1.215408  | -0.363258 |
| 6  | -0.514288 | -0.109663 | 0.070720  |
| 6  | 0.553101  | 1.457549  | -1.475316 |
| 6  | 0.094531  | -1.156614 | -0.622793 |
| 6  | 1.170159  | 0.371738  | -2.099617 |
| 1  | -0.087021 | -2.173474 | -0.279737 |
| 1  | 1.814847  | 0.566826  | -2.954518 |

|   |           |           |           |
|---|-----------|-----------|-----------|
| 6 | 0.949067  | -0.944843 | -1.700776 |
| 6 | 1.480315  | 0.674123  | 2.861701  |
| 6 | 0.739084  | 0.770742  | 4.051834  |
| 6 | 1.823712  | -0.611766 | 2.390351  |
| 6 | 0.279666  | -0.387026 | 4.690292  |
| 6 | 1.362748  | -1.750195 | 3.044228  |
| 1 | -0.310199 | -0.296383 | 5.600903  |
| 1 | 1.623419  | -2.734826 | 2.658776  |
| 6 | 0.564842  | -1.653211 | 4.188538  |
| 6 | 4.021000  | 2.580211  | 1.747062  |
| 6 | 4.738858  | 2.692493  | 2.958046  |
| 6 | 4.743130  | 2.696532  | 0.543779  |
| 6 | 6.118415  | 2.893320  | 2.949980  |
| 6 | 6.125928  | 2.889789  | 0.558820  |
| 1 | 6.651464  | 2.981445  | 3.895008  |
| 1 | 6.663832  | 2.973426  | -0.383856 |
| 6 | 6.832231  | 2.984751  | 1.755219  |
| 6 | 4.018124  | 2.614280  | 4.286021  |
| 1 | 3.550933  | 1.633729  | 4.430533  |
| 1 | 4.699196  | 2.792202  | 5.121589  |
| 1 | 3.223506  | 3.369068  | 4.350003  |
| 6 | 8.329018  | 3.159554  | 1.762875  |
| 1 | 8.649507  | 3.791907  | 2.594847  |
| 1 | 8.833532  | 2.193667  | 1.872151  |
| 1 | 8.680230  | 3.612358  | 0.832613  |
| 6 | 0.735357  | 2.827846  | -2.079073 |
| 1 | 1.177844  | 2.738314  | -3.073610 |
| 1 | -0.218698 | 3.354364  | -2.168859 |
| 1 | 1.377123  | 3.470432  | -1.471223 |
| 6 | -1.395027 | -0.442506 | 1.246850  |
| 1 | -2.457933 | -0.386201 | 0.989484  |
| 1 | -1.173799 | -1.453313 | 1.596426  |
| 1 | -1.215220 | 0.242534  | 2.078884  |
| 6 | 1.648875  | -2.092117 | -2.380423 |
| 1 | 2.625111  | -2.280646 | -1.919261 |
| 1 | 1.065249  | -3.012766 | -2.305592 |
| 1 | 1.822517  | -1.881031 | -3.438633 |
| 6 | -2.671930 | 1.506371  | -2.097542 |
| 1 | -1.959430 | 2.278831  | -2.394847 |
| 1 | -2.144692 | 0.547482  | -2.142951 |
| 1 | -3.478798 | 1.487082  | -2.833189 |
| 6 | -6.716520 | 1.778503  | 0.861473  |
| 1 | -7.161922 | 1.196937  | 0.051192  |
| 1 | -6.964837 | 1.290375  | 1.807900  |
| 1 | -7.194819 | 2.763457  | 0.866820  |
| 6 | 2.739260  | -0.746866 | 1.194378  |
| 1 | 3.771708  | -0.500013 | 1.467024  |
| 1 | 2.724508  | -1.760173 | 0.783931  |
| 1 | 2.438934  | -0.076042 | 0.376865  |
| 6 | 0.487806  | 2.106778  | 4.714647  |
| 1 | 1.236939  | 2.289964  | 5.493573  |
| 1 | 0.540842  | 2.940511  | 4.003830  |
| 1 | -0.495721 | 2.144697  | 5.191581  |
| 6 | 0.019523  | -2.893604 | 4.848085  |
| 1 | -0.859487 | -3.264475 | 4.309811  |
| 1 | 0.760952  | -3.697001 | 4.855696  |
| 1 | -0.282664 | -2.695645 | 5.879011  |
| 6 | -2.202848 | 2.806186  | 2.810368  |
| 1 | -2.754799 | 2.612116  | 3.733207  |
| 1 | -1.277487 | 2.224609  | 2.824263  |

|   |           |          |           |
|---|-----------|----------|-----------|
| 1 | -1.912706 | 3.862830 | 2.796919  |
| 6 | 4.029527  | 2.666840 | -0.787202 |
| 1 | 4.720223  | 2.471552 | -1.611559 |
| 1 | 3.249216  | 1.896308 | -0.824776 |
| 1 | 3.545106  | 3.630913 | -0.980131 |

## 4.2. Dimers

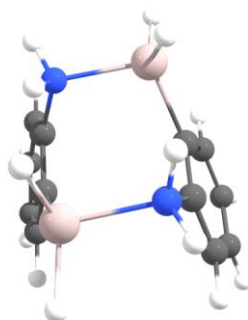

Figure S85: Computed structure of H/H.

Data for system: **H/H**

```
#p m062x/6-31g(d,p) scf=(maxcycles=100) int=ultrafine nosymm freq opt
```

--Link1--

```
#p m062x/def2tzvp scf=(maxcycles=100) int=ultrafine nosymm guess=read geom=check
SCRF=(Solvent=benzene,SMD)
```

SCF Done: E(RM062X) = -1061.28894020 A.U.

Zero-point correction= 0.250197 (Hartree/Particle)

Thermal correction to Energy= 0.265660

Thermal correction to Enthalpy= 0.266604

Thermal correction to Gibbs Free Energy= 0.208002

Optimized Geometry (XYZ coordinates in Angstrom)

|    |           |          |           |
|----|-----------|----------|-----------|
| 6  | 2.560852  | 4.826209 | 2.273043  |
| 6  | 1.213708  | 5.130209 | 2.044254  |
| 13 | -0.193400 | 4.988090 | 3.444563  |
| 7  | 2.939640  | 4.331349 | 3.594546  |
| 6  | 0.899611  | 5.528384 | 0.736566  |
| 1  | -0.131651 | 5.779180 | 0.497433  |
| 6  | 1.858821  | 5.607796 | -0.272619 |
| 1  | 1.573930  | 5.916592 | -1.273249 |
| 6  | 3.541946  | 4.887433 | 1.290907  |
| 1  | 4.571645  | 4.623409 | 1.520555  |
| 6  | 3.182233  | 5.284601 | 0.005545  |
| 1  | 3.937740  | 5.339063 | -0.771409 |
| 1  | 3.916066  | 4.548847 | 3.792940  |
| 1  | 0.383525  | 5.381066 | 4.894999  |
| 1  | -1.645314 | 5.447075 | 2.992743  |
| 1  | 2.372810  | 4.797411 | 4.310194  |
| 6  | -0.631482 | 1.214388 | 0.456343  |
| 6  | 0.695019  | 0.837986 | 0.277652  |
| 1  | 0.992739  | 0.308061 | -0.621420 |
| 1  | -1.376588 | 0.981751 | -0.297386 |
| 6  | -1.007780 | 1.895897 | 1.611033  |

|    |           |          |          |
|----|-----------|----------|----------|
| 6  | 1.640748  | 1.148618 | 1.254360 |
| 1  | 2.674740  | 0.851365 | 1.092976 |
| 6  | 1.309795  | 1.836284 | 2.431120 |
| 6  | -0.039824 | 2.182790 | 2.565786 |
| 1  | -2.039930 | 2.204507 | 1.759781 |
| 7  | -0.434936 | 2.968784 | 3.732359 |
| 13 | 2.698597  | 2.299883 | 3.779181 |
| 1  | 4.155599  | 1.750317 | 3.465694 |
| 1  | 2.101888  | 2.252804 | 5.273348 |
| 1  | 0.122020  | 2.681565 | 4.543516 |
| 1  | -1.414125 | 2.801549 | 3.963152 |

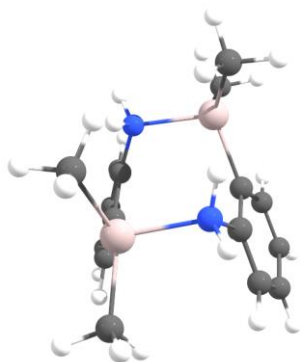

**Figure S86:** Computed structure of H/CH<sub>3</sub>.

Data for system: **H/CH<sub>3</sub>**

```
#p m062x/6-31g(d,p) scf=(maxcycles=100) int=ultrafine nosymm freq opt
```

--Link1--

```
#p m062x/def2tzvp scf=(maxcycles=100) int=ultrafine nosymm guess=read geom=check
SCRF=(Solvent=benzene,SMD)
```

```
SCF Done: E(RM062X) = -1218.58429479 A.U.
Zero-point correction=          0.365521 (Hartree/Particle)
Thermal correction to Energy=          0.389846
Thermal correction to Enthalpy=         0.390790
Thermal correction to Gibbs Free Energy= 0.311811
```

Optimized Geometry (XYZ coordinates in Angstrom)

|    |           |          |           |
|----|-----------|----------|-----------|
| 6  | 2.515625  | 4.774441 | 1.618931  |
| 6  | 1.175276  | 5.077559 | 1.354781  |
| 13 | -0.337240 | 4.929558 | 2.657063  |
| 7  | 2.859102  | 4.260287 | 2.941046  |
| 6  | 0.907552  | 5.504873 | 0.044982  |
| 1  | -0.116011 | 5.757316 | -0.225832 |
| 6  | 1.899003  | 5.613191 | -0.930276 |
| 1  | 1.645815  | 5.945416 | -1.932029 |
| 6  | 3.529388  | 4.862405 | 0.671832  |
| 1  | 4.552117  | 4.599550 | 0.932706  |
| 6  | 3.213518  | 5.288451 | -0.615754 |
| 1  | 3.995238  | 5.364619 | -1.364522 |
| 1  | 3.821892  | 4.500591 | 3.177962  |
| 1  | 2.260916  | 4.700450 | 3.643656  |
| 6  | -0.646081 | 1.036313 | -0.200569 |
| 6  | 0.681312  | 0.652974 | -0.353333 |
| 1  | 0.987077  | 0.089259 | -1.228960 |

|    |           |          |           |
|----|-----------|----------|-----------|
| 1  | -1.385681 | 0.776102 | -0.950781 |
| 6  | -1.029594 | 1.759824 | 0.925792  |
| 6  | 1.618018  | 1.000731 | 0.620076  |
| 1  | 2.653060  | 0.696485 | 0.475734  |
| 6  | 1.281454  | 1.731384 | 1.770153  |
| 6  | -0.069231 | 2.080913 | 1.878180  |
| 1  | -2.063180 | 2.071830 | 1.057934  |
| 7  | -0.481439 | 2.897768 | 3.015317  |
| 13 | 2.722370  | 2.201084 | 3.077489  |
| 1  | 0.073048  | 2.643892 | 3.835863  |
| 1  | -1.457841 | 2.716507 | 3.249098  |
| 6  | -2.096109 | 5.323588 | 1.856041  |
| 1  | -2.264608 | 4.768669 | 0.925153  |
| 1  | -2.927808 | 5.082649 | 2.529584  |
| 1  | -2.203122 | 6.385547 | 1.607134  |
| 6  | 0.048231  | 5.594897 | 4.494445  |
| 1  | -0.870375 | 5.589428 | 5.094292  |
| 1  | 0.784134  | 5.033772 | 5.087712  |
| 1  | 0.390507  | 6.636399 | 4.479616  |
| 6  | 4.518609  | 1.639302 | 2.487460  |
| 1  | 5.315940  | 2.044083 | 3.122942  |
| 1  | 4.634915  | 0.549750 | 2.508823  |
| 1  | 4.735416  | 1.954148 | 1.459430  |
| 6  | 2.234871  | 1.997371 | 4.997759  |
| 1  | 1.468749  | 2.677908 | 5.395637  |
| 1  | 1.890805  | 0.979880 | 5.217759  |
| 1  | 3.118701  | 2.158178 | 5.627577  |

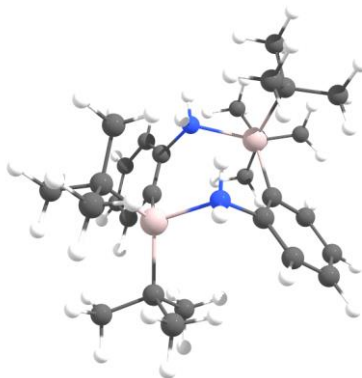

**Figure S87:** Computed structure of H/*t*-but.

Data for system: **H/*t*-but**

```
#p m062x/6-31g(d,p) scf=(maxcycles=100) int=ultrafine nosymm freq opt
```

```
--Link1--
```

```
#p m062x/def2tzvp scf=(maxcycles=100) int=ultrafine nosymm guess=read geom=check
SCRF=(Solvent=benzene,SMD)
```

```
SCF Done: E(RM062X) = -1690.23081218 A.U.
Zero-point correction=          0.710413 (Hartree/Particle)
Thermal correction to Energy=    0.749566
Thermal correction to Enthalpy=  0.750510
Thermal correction to Gibbs Free Energy=  0.643192
```

Optimized Geometry (XYZ coordinates in Angstrom)

|   |          |          |          |
|---|----------|----------|----------|
| 6 | 2.926529 | 4.873151 | 1.806728 |
|---|----------|----------|----------|

|    |           |           |           |
|----|-----------|-----------|-----------|
| 6  | 1.716397  | 5.101529  | 1.138803  |
| 13 | -0.178078 | 4.843545  | 1.768642  |
| 7  | 2.959640  | 3.917925  | 2.916089  |
| 6  | 1.819855  | 5.946314  | 0.017382  |
| 1  | 0.924947  | 6.166186  | -0.559061 |
| 6  | 3.014377  | 6.533837  | -0.396217 |
| 1  | 3.033093  | 7.169445  | -1.275545 |
| 6  | 4.123701  | 5.492386  | 1.456584  |
| 1  | 5.018527  | 5.336190  | 2.052255  |
| 6  | 4.171380  | 6.323064  | 0.341927  |
| 1  | 5.105213  | 6.799483  | 0.063127  |
| 1  | 3.836157  | 4.021210  | 3.432788  |
| 1  | 2.223003  | 4.148323  | 3.586425  |
| 6  | -1.190821 | -0.007384 | 0.757154  |
| 6  | 0.068135  | -0.382876 | 0.307689  |
| 1  | 0.181977  | -1.232663 | -0.357471 |
| 1  | -2.075765 | -0.562782 | 0.465346  |
| 6  | -1.310888 | 1.094244  | 1.597717  |
| 6  | 1.190019  | 0.322018  | 0.740910  |
| 1  | 2.163388  | -0.024609 | 0.403377  |
| 6  | 1.124149  | 1.440476  | 1.593345  |
| 6  | -0.175113 | 1.812505  | 1.962862  |
| 1  | -2.288838 | 1.384549  | 1.970854  |
| 7  | -0.371326 | 3.030351  | 2.751938  |
| 13 | 2.890870  | 1.902411  | 2.440558  |
| 1  | 0.237980  | 3.006480  | 3.572373  |
| 1  | -1.323696 | 3.049001  | 3.124206  |
| 6  | -0.461337 | 6.084811  | 3.336567  |
| 6  | -1.572819 | 4.814900  | 0.323995  |
| 6  | 4.508683  | 1.571401  | 1.297928  |
| 6  | 2.875998  | 1.139486  | 4.310630  |
| 6  | -1.889417 | 6.012244  | 3.891162  |
| 1  | -2.631325 | 6.301188  | 3.138562  |
| 1  | -2.156948 | 5.006617  | 4.247284  |
| 1  | -2.017334 | 6.691443  | 4.749145  |
| 6  | -0.194397 | 7.525665  | 2.873038  |
| 1  | 0.824920  | 7.643734  | 2.485592  |
| 1  | -0.884964 | 7.838097  | 2.082102  |
| 1  | -0.314221 | 8.236091  | 3.706658  |
| 6  | 0.514574  | 5.797093  | 4.485383  |
| 1  | 0.420156  | 4.776880  | 4.891080  |
| 1  | 1.556376  | 5.960931  | 4.176254  |
| 1  | 0.339487  | 6.473836  | 5.336543  |
| 6  | -1.913992 | 6.246390  | -0.126675 |
| 1  | -1.047235 | 6.814268  | -0.482803 |
| 1  | -2.642415 | 6.220243  | -0.952399 |
| 1  | -2.370594 | 6.826082  | 0.684553  |
| 6  | -1.103225 | 4.005570  | -0.895268 |
| 1  | -0.191291 | 4.414739  | -1.342952 |
| 1  | -0.894815 | 2.960303  | -0.636163 |
| 1  | -1.878797 | 4.002078  | -1.677727 |
| 6  | -2.890773 | 4.196083  | 0.817329  |
| 1  | -3.669592 | 4.289527  | 0.044263  |
| 1  | -2.788334 | 3.127117  | 1.021375  |
| 1  | -3.278034 | 4.684121  | 1.719859  |
| 6  | 4.887503  | 0.079661  | 1.313754  |
| 1  | 5.192986  | -0.248314 | 2.314658  |
| 1  | 4.078479  | -0.583684 | 0.988065  |
| 1  | 5.741548  | -0.101340 | 0.642206  |
| 6  | 5.739406  | 2.331414  | 1.818662  |

|   |          |           |           |
|---|----------|-----------|-----------|
| 1 | 5.958238 | 2.116453  | 2.871541  |
| 1 | 6.634530 | 2.049775  | 1.242207  |
| 1 | 5.628944 | 3.412896  | 1.704198  |
| 6 | 4.269299 | 2.010550  | -0.155488 |
| 1 | 5.164579 | 1.819197  | -0.768346 |
| 1 | 3.435187 | 1.476045  | -0.622358 |
| 1 | 4.046774 | 3.082256  | -0.226993 |
| 6 | 2.656649 | -0.378707 | 4.216083  |
| 1 | 2.619130 | -0.834391 | 5.218556  |
| 1 | 1.713799 | -0.620440 | 3.710444  |
| 1 | 3.461955 | -0.877310 | 3.665767  |
| 6 | 4.191911 | 1.392454  | 5.056784  |
| 1 | 4.157993 | 0.973457  | 6.075169  |
| 1 | 5.042847 | 0.928428  | 4.546033  |
| 1 | 4.419176 | 2.462854  | 5.167904  |
| 6 | 1.727975 | 1.704677  | 5.157497  |
| 1 | 0.749571 | 1.439563  | 4.733105  |
| 1 | 1.741045 | 1.287314  | 6.176684  |
| 1 | 1.776972 | 2.798445  | 5.282512  |

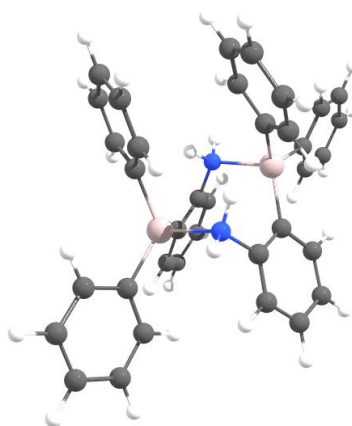

**Figure S88:** Computed structure of H/Ph.

Data for system: **H/Ph**

```
#p m062x/6-31g(d,p) scf=(maxcycles=100) int=ultrafine nosymm freq opt
```

--Link1--

```
#p m062x/def2tzvp scf=(maxcycles=100) int=ultrafine nosymm guess=read geom=check
SCRF=(Solvent=benzene,SMD)
```

SCF Done: E(RM062X) = -1985.52708228 A.U.

Zero-point correction= 0.587289 (Hartree/Particle)

Thermal correction to Energy= 0.622956

Thermal correction to Enthalpy= 0.623901

Thermal correction to Gibbs Free Energy= 0.516455

Optimized Geometry (XYZ coordinates in Angstrom)

|    |           |          |           |
|----|-----------|----------|-----------|
| 6  | 2.492298  | 4.802572 | 0.556364  |
| 6  | 1.121551  | 4.934905 | 0.296741  |
| 13 | -0.333903 | 4.553053 | 1.601266  |
| 7  | 2.915176  | 4.302880 | 1.860725  |
| 6  | 0.795560  | 5.400875 | -0.987327 |
| 1  | -0.252291 | 5.545837 | -1.242298 |
| 6  | 1.761619  | 5.688902 | -1.951079 |



|    |           |           |           |
|----|-----------|-----------|-----------|
| 1  | 1.463836  | 6.042611  | -2.932892 |
| 6  | 3.481160  | 5.078226  | -0.382365 |
| 1  | 4.530548  | 4.942424  | -0.130493 |
| 6  | 3.107836  | 5.520841  | -1.648754 |
| 1  | 3.871252  | 5.739545  | -2.388302 |
| 1  | 3.863221  | 4.622539  | 2.063752  |
| 1  | 2.310269  | 4.681870  | 2.598379  |
| 6  | -0.240200 | 0.416543  | -1.055922 |
| 6  | 1.121381  | 0.183321  | -1.209787 |
| 1  | 1.480482  | -0.421428 | -2.036278 |
| 1  | -0.954591 | -0.000707 | -1.758150 |
| 6  | -0.692772 | 1.183245  | 0.014782  |
| 6  | 2.023807  | 0.730010  | -0.297728 |
| 1  | 3.084787  | 0.529780  | -0.432860 |
| 6  | 1.617558  | 1.524726  | 0.786633  |
| 6  | 0.233954  | 1.711128  | 0.907828  |
| 1  | -1.755175 | 1.373855  | 0.149229  |
| 7  | -0.270028 | 2.542313  | 1.996358  |
| 13 | 2.987047  | 2.260304  | 2.031579  |
| 1  | 0.281529  | 2.383657  | 2.847364  |
| 1  | -1.232137 | 2.280686  | 2.215659  |
| 6  | 0.078646  | 5.233589  | 3.422867  |
| 6  | 0.891162  | 6.366841  | 3.617185  |
| 6  | -0.390833 | 4.598502  | 4.587148  |
| 6  | 1.221711  | 6.836000  | 4.888942  |
| 6  | -0.079381 | 5.060407  | 5.863221  |
| 6  | 0.732894  | 6.181812  | 6.016070  |
| 1  | 1.280195  | 6.900200  | 2.748324  |
| 1  | -1.018802 | 3.709575  | 4.509226  |
| 1  | 1.852472  | 7.713309  | 5.000113  |
| 1  | -0.455226 | 4.537624  | 6.737855  |
| 1  | 0.984382  | 6.542315  | 7.008991  |
| 6  | -2.176744 | 4.748996  | 0.928066  |
| 6  | -2.598915 | 4.243342  | -0.316492 |
| 6  | -3.158403 | 5.367929  | 1.721790  |
| 6  | -3.920891 | 4.346837  | -0.745083 |
| 6  | -4.483997 | 5.479648  | 1.303702  |
| 6  | -4.867150 | 4.967471  | 0.067420  |
| 1  | -1.878219 | 3.755924  | -0.973064 |
| 1  | -2.880648 | 5.777450  | 2.692249  |
| 1  | -4.213343 | 3.948353  | -1.712352 |
| 1  | -5.216843 | 5.966741  | 1.940395  |
| 1  | -5.897951 | 5.052783  | -0.263159 |
| 6  | 2.449566  | 2.098410  | 3.938476  |
| 6  | 1.605157  | 1.062127  | 4.380264  |
| 6  | 2.855745  | 3.027439  | 4.913843  |
| 6  | 1.184115  | 0.959795  | 5.706589  |
| 6  | 2.453935  | 2.933108  | 6.243666  |
| 6  | 1.611513  | 1.897599  | 6.642106  |
| 1  | 1.263317  | 0.310916  | 3.666341  |
| 1  | 3.504955  | 3.859974  | 4.638203  |
| 1  | 0.530675  | 0.147105  | 6.010627  |
| 1  | 2.782713  | 3.675067  | 6.965447  |
| 1  | 1.289278  | 1.823412  | 7.676415  |
| 6  | 4.867555  | 1.908507  | 1.554863  |
| 6  | 5.795373  | 1.538619  | 2.544324  |
| 6  | 5.367924  | 2.063692  | 0.247810  |
| 6  | 7.143479  | 1.333366  | 2.252882  |
| 6  | 6.713094  | 1.863520  | -0.056160 |
| 6  | 7.604456  | 1.496650  | 0.949634  |

|   |          |          |           |
|---|----------|----------|-----------|
| 1 | 5.456443 | 1.403480 | 3.570733  |
| 1 | 4.691233 | 2.347110 | -0.558316 |
| 1 | 7.833459 | 1.044984 | 3.040581  |
| 1 | 7.066367 | 1.989103 | -1.075653 |
| 1 | 8.653123 | 1.337035 | 0.717460  |

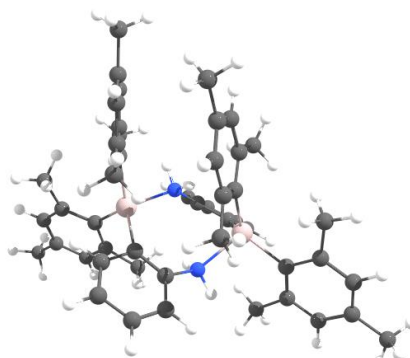

**Figure S89:** Computed structure of H/Mes.

Data for system: **H/Mes**

```
#p m062x/6-31g(d,p) scf=(maxcycles=100) int=ultrafine nosymm freq opt
```

--Link1--

```
#p m062x/def2tzvp scf=(maxcycles=100) int=ultrafine nosymm guess=read geom=check
SCRF=(Solvent=benzene,SMD)
```

```
SCF Done: E(RM062X) = -2457.22299896 A.U.
Zero-point correction=          0.922288 (Hartree/Particle)
Thermal correction to Energy=          0.976917
Thermal correction to Enthalpy=        0.977861
Thermal correction to Gibbs Free Energy= 0.833559
```

Optimized Geometry (XYZ coordinates in Angstrom)

|    |           |           |          |
|----|-----------|-----------|----------|
| 6  | 1.918572  | 6.780764  | 3.602782 |
| 6  | 0.666531  | 7.104158  | 3.072507 |
| 13 | -0.872675 | 6.005274  | 2.379695 |
| 7  | 2.306857  | 5.382533  | 3.760911 |
| 6  | 0.360559  | 8.479954  | 3.091357 |
| 1  | -0.617454 | 8.806612  | 2.736711 |
| 6  | 1.242452  | 9.457891  | 3.538362 |
| 1  | 0.953716  | 10.503749 | 3.520511 |
| 6  | 2.824464  | 7.735269  | 4.067648 |
| 1  | 3.789402  | 7.421715  | 4.461679 |
| 6  | 2.494426  | 9.082384  | 4.018217 |
| 1  | 3.200185  | 9.826948  | 4.371232 |
| 1  | 3.039957  | 5.344010  | 4.469935 |
| 1  | 1.513834  | 4.888525  | 4.179378 |
| 6  | -0.542706 | 0.999980  | 4.042628 |
| 6  | 0.790504  | 0.667350  | 4.269304 |
| 1  | 1.039483  | -0.225388 | 4.834187 |
| 1  | -1.340263 | 0.376582  | 4.433429 |
| 6  | -0.853719 | 2.136544  | 3.304105 |
| 6  | 1.801718  | 1.487935  | 3.772942 |
| 1  | 2.838993  | 1.217695  | 3.968801 |
| 6  | 1.538496  | 2.653016  | 3.032687 |
| 6  | 0.182007  | 2.927932  | 2.810539 |

|    |           |          |           |
|----|-----------|----------|-----------|
| 1  | -1.888864 | 2.415405 | 3.118103  |
| 7  | -0.189363 | 4.077070 | 1.993166  |
| 13 | 2.983495  | 3.914711 | 2.417011  |
| 1  | -0.934987 | 3.783850 | 1.360804  |
| 1  | 0.583792  | 4.302825 | 1.352834  |
| 1  | -3.094292 | 7.965791 | 1.841536  |
| 1  | -4.803735 | 7.943529 | 2.287936  |
| 6  | -3.908252 | 7.324418 | 2.192581  |
| 1  | -4.090798 | 6.596805 | 1.395904  |
| 6  | -3.578873 | 6.660115 | 3.513252  |
| 6  | -2.320087 | 6.060848 | 3.757990  |
| 6  | -4.565272 | 6.682796 | 4.502524  |
| 1  | -5.523451 | 7.151695 | 4.285010  |
| 6  | -4.353586 | 6.133100 | 5.763721  |
| 6  | -3.100157 | 5.589702 | 6.031741  |
| 1  | -2.895631 | 5.191554 | 7.024111  |
| 6  | -2.096371 | 5.561873 | 5.062237  |
| 6  | -0.736529 | 5.044877 | 5.481138  |
| 1  | -0.009376 | 5.866501 | 5.495564  |
| 1  | -0.372613 | 4.259910 | 4.808841  |
| 1  | -0.766816 | 4.611340 | 6.483738  |
| 1  | -6.058322 | 5.223054 | 6.719466  |
| 6  | -5.444377 | 6.126246 | 6.803273  |
| 1  | -5.029220 | 6.148627 | 7.814025  |
| 1  | -6.108548 | 6.986255 | 6.686065  |
| 1  | -4.158311 | 4.253191 | 0.503956  |
| 6  | -3.102848 | 4.244699 | 0.791745  |
| 1  | -3.063254 | 4.498548 | 1.855104  |
| 1  | -2.771335 | 3.202883 | 0.670394  |
| 6  | -2.312287 | 5.201491 | -0.091276 |
| 6  | -2.581480 | 5.110798 | -1.459269 |
| 1  | -3.309094 | 4.378853 | -1.809122 |
| 6  | -1.950066 | 5.936777 | -2.382191 |
| 6  | -2.223349 | 5.807113 | -3.858624 |
| 1  | -1.778413 | 4.890397 | -4.261156 |
| 1  | -3.297105 | 5.761801 | -4.061956 |
| 1  | -1.806921 | 6.651577 | -4.413434 |
| 6  | -1.055545 | 6.881176 | -1.888965 |
| 1  | -0.567926 | 7.559563 | -2.587013 |
| 1  | -0.315036 | 8.879661 | 0.418150  |
| 6  | 0.200530  | 8.078494 | -0.122631 |
| 1  | 0.993533  | 7.702549 | 0.526412  |
| 1  | 0.671902  | 8.524021 | -1.003108 |
| 6  | -0.762454 | 6.987203 | -0.527463 |
| 6  | -1.372867 | 6.133033 | 0.422156  |
| 1  | 0.767048  | 2.119140 | 0.317379  |
| 6  | 1.743570  | 2.256403 | -0.161078 |
| 1  | 2.480282  | 1.785420 | 0.496351  |
| 1  | 1.725116  | 1.693334 | -1.097313 |
| 6  | 2.069467  | 3.712694 | -0.434021 |
| 6  | 1.774806  | 4.200544 | -1.706003 |
| 1  | 1.290734  | 3.545192 | -2.428432 |
| 6  | 2.106719  | 5.500533 | -2.088063 |
| 6  | 1.808808  | 5.992356 | -3.480122 |
| 1  | 2.531607  | 5.591831 | -4.198917 |
| 1  | 0.811220  | 5.677577 | -3.799610 |
| 1  | 1.855614  | 7.083344 | -3.531948 |
| 6  | 2.775109  | 6.294760 | -1.164983 |
| 1  | 3.084763  | 7.299097 | -1.451791 |
| 1  | 3.245919  | 7.636585 | 1.331362  |

|   |          |          |          |
|---|----------|----------|----------|
| 6 | 3.844281 | 6.773024 | 1.020828 |
| 1 | 4.207718 | 6.276569 | 1.927458 |
| 1 | 4.722423 | 7.156352 | 0.491125 |
| 6 | 3.061648 | 5.838028 | 0.125647 |
| 6 | 2.681905 | 4.544907 | 0.542586 |
| 6 | 5.735907 | 3.456792 | 0.731593 |
| 1 | 4.931251 | 2.829094 | 0.336223 |
| 1 | 6.657999 | 3.181777 | 0.214099 |
| 1 | 5.489766 | 4.486826 | 0.455483 |
| 6 | 5.896485 | 3.299994 | 2.228538 |
| 6 | 7.164389 | 2.974136 | 2.703060 |
| 6 | 7.418670 | 2.797611 | 4.063635 |
| 6 | 8.800517 | 2.442845 | 4.547724 |
| 1 | 7.979998 | 2.846301 | 1.993393 |
| 1 | 9.148610 | 1.510956 | 4.091996 |
| 1 | 9.520962 | 3.222650 | 4.282257 |
| 1 | 8.821529 | 2.318109 | 5.632649 |
| 6 | 6.356006 | 2.950190 | 4.942137 |
| 1 | 6.523641 | 2.805012 | 6.008216 |
| 1 | 4.192859 | 2.711600 | 6.381791 |
| 6 | 4.020011 | 3.432022 | 5.577749 |
| 1 | 3.002193 | 3.263178 | 5.218631 |
| 1 | 4.066343 | 4.424516 | 6.047999 |
| 6 | 5.071281 | 3.280736 | 4.492994 |
| 6 | 4.802214 | 3.472701 | 3.119066 |

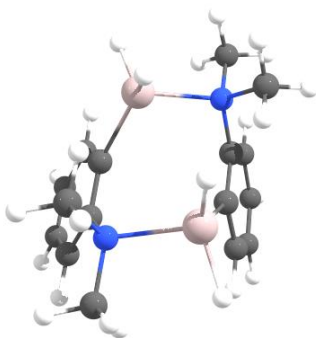

**Figure S90:** Computed structure of CH<sub>3</sub>/H.

Data for system: CH<sub>3</sub>/H

```
#p m062x/6-31g(d,p) scf=(maxcycles=100) int=ultrafine nosymm freq opt
```

```
--Link1--
```

```
#p m062x/def2tzvp scf=(maxcycles=100) int=ultrafine nosymm guess=read geom=check
SCRF=(Solvent=benzene,SMD)
```

SCF Done: E(RM062X) = -1218.46406534 A.U.

Zero-point correction= 0.365463 (Hartree/Particle)

Thermal correction to Energy= 0.385588

Thermal correction to Enthalpy= 0.386532

Thermal correction to Gibbs Free Energy= 0.319048

Optimized Geometry (XYZ coordinates in Angstrom)

|    |          |          |          |
|----|----------|----------|----------|
| 6  | 3.060384 | 4.339146 | 2.137399 |
| 6  | 1.819738 | 4.987162 | 1.970004 |
| 13 | 0.352136 | 4.877178 | 0.602837 |
| 7  | 3.526379 | 3.404105 | 1.089828 |

|    |           |          |           |
|----|-----------|----------|-----------|
| 6  | 1.450650  | 5.868922 | 2.999149  |
| 1  | 0.509821  | 6.408046 | 2.907739  |
| 6  | 2.226143  | 6.090967 | 4.136998  |
| 1  | 1.887699  | 6.777207 | 4.906713  |
| 6  | 3.852316  | 4.551084 | 3.264751  |
| 1  | 4.802943  | 4.051593 | 3.394380  |
| 6  | 3.431029  | 5.423277 | 4.267847  |
| 1  | 4.058602  | 5.572826 | 5.140511  |
| 1  | -0.568092 | 6.167006 | 0.787659  |
| 1  | 0.655896  | 4.424684 | -0.890516 |
| 6  | -0.673635 | 1.959609 | 4.700427  |
| 6  | 0.525600  | 1.273773 | 4.621741  |
| 1  | 0.912633  | 0.736156 | 5.481450  |
| 1  | -1.248311 | 1.972820 | 5.620930  |
| 6  | -1.158037 | 2.638732 | 3.583048  |
| 6  | 1.231744  | 1.283203 | 3.419036  |
| 1  | 2.168767  | 0.731925 | 3.371269  |
| 6  | 0.797927  | 1.966761 | 2.271271  |
| 6  | -0.434435 | 2.640631 | 2.391684  |
| 1  | -2.102386 | 3.157944 | 3.675876  |
| 7  | -0.965261 | 3.375600 | 1.222453  |
| 13 | 2.182864  | 1.823003 | 0.823641  |
| 1  | 1.791638  | 2.004896 | -0.706431 |
| 1  | 3.118686  | 0.581394 | 1.180373  |
| 6  | 3.718543  | 4.130111 | -0.198598 |
| 1  | 4.460803  | 4.923049 | -0.057877 |
| 1  | 4.066921  | 3.417937 | -0.948876 |
| 1  | 2.777500  | 4.552171 | -0.540551 |
| 6  | 4.821366  | 2.756034 | 1.408487  |
| 1  | 4.739829  | 2.186299 | 2.333976  |
| 1  | 5.061388  | 2.061380 | 0.603526  |
| 1  | 5.614763  | 3.506684 | 1.492005  |
| 6  | -1.227512 | 2.432559 | 0.097315  |
| 1  | -0.305184 | 1.954065 | -0.220081 |
| 1  | -1.953920 | 1.679338 | 0.420554  |
| 1  | -1.625228 | 3.001013 | -0.745395 |
| 6  | -2.243453 | 4.076353 | 1.494249  |
| 1  | -2.533140 | 4.617125 | 0.593242  |
| 1  | -3.026522 | 3.356428 | 1.755833  |
| 1  | -2.112202 | 4.802001 | 2.296653  |

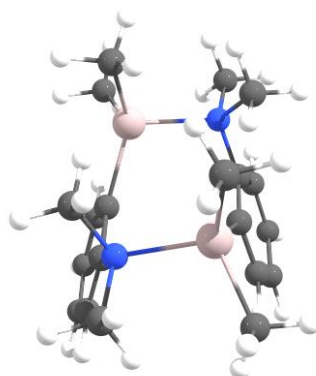

**Figure S91:** Computed structure of CH<sub>3</sub>/CH<sub>3</sub>.

Data for system: CH<sub>3</sub>/CH<sub>3</sub>

#p m062x/6-31g(d,p) scf=(maxcycles=100) int=ultrafine nosymm freq opt

--Link1--

#p m062x/def2tzvp scf=(maxcycles=100) int=ultrafine nosymm guess=read geom=check  
SCRF=(Solvent=benzene,SMD)

SCF Done: E(RM062X) = -1375.74794959 A.U.  
Zero-point correction= 0.483054 (Hartree/Particle)  
Thermal correction to Energy= 0.510508  
Thermal correction to Enthalpy= 0.511452  
Thermal correction to Gibbs Free Energy= 0.429892

Optimized Geometry (XYZ coordinates in Angstrom)

|    |           |          |           |
|----|-----------|----------|-----------|
| 6  | 3.104448  | 4.336772 | 2.115004  |
| 6  | 1.853356  | 4.994165 | 2.044579  |
| 13 | 0.272120  | 5.071376 | 0.754407  |
| 7  | 3.524259  | 3.447454 | 1.011685  |
| 6  | 1.544858  | 5.782518 | 3.168148  |
| 1  | 0.604136  | 6.323304 | 3.184273  |
| 6  | 2.368601  | 5.913902 | 4.286068  |
| 1  | 2.058142  | 6.531923 | 5.122529  |
| 6  | 3.947938  | 4.463804 | 3.218658  |
| 1  | 4.904462  | 3.961460 | 3.259905  |
| 6  | 3.579136  | 5.247928 | 4.309719  |
| 1  | 4.248110  | 5.328653 | 5.160387  |
| 6  | -0.806506 | 2.248765 | 4.723837  |
| 6  | 0.402878  | 1.581273 | 4.757518  |
| 1  | 0.762511  | 1.129326 | 5.676435  |
| 1  | -1.425485 | 2.334651 | 5.611059  |
| 6  | -1.239968 | 2.815521 | 3.527066  |
| 6  | 1.161339  | 1.494024 | 3.590044  |
| 1  | 2.103255  | 0.958966 | 3.654721  |
| 6  | 0.786703  | 2.059196 | 2.357459  |
| 6  | -0.461421 | 2.726030 | 2.373224  |
| 1  | -2.194805 | 3.322738 | 3.527147  |
| 7  | -0.948212 | 3.392307 | 1.147003  |
| 13 | 2.292431  | 1.730385 | 1.017175  |
| 6  | 3.505907  | 4.180224 | -0.282157 |
| 1  | 4.206130  | 5.021204 | -0.227308 |
| 1  | 3.805097  | 3.497200 | -1.078171 |
| 1  | 2.513080  | 4.552628 | -0.499323 |
| 6  | 4.904414  | 2.923808 | 1.150492  |
| 1  | 5.005840  | 2.322677 | 2.050450  |
| 1  | 5.106359  | 2.283079 | 0.290418  |
| 1  | 5.623793  | 3.750282 | 1.164423  |
| 6  | -1.000260 | 2.426575 | 0.017383  |
| 1  | -0.019683 | 2.012997 | -0.180109 |
| 1  | -1.692674 | 1.616147 | 0.271009  |
| 1  | -1.346816 | 2.947530 | -0.876014 |
| 6  | -2.320695 | 3.941269 | 1.262219  |
| 1  | -2.574400 | 4.408364 | 0.309073  |
| 1  | -3.034148 | 3.136866 | 1.473659  |
| 1  | -2.373732 | 4.702784 | 2.036136  |
| 6  | 2.066064  | 1.408287 | -0.932659 |
| 1  | 3.057281  | 1.166406 | -1.340982 |
| 1  | 1.456410  | 0.510189 | -1.098014 |
| 1  | 1.649542  | 2.197000 | -1.566027 |
| 6  | 3.447415  | 0.274931 | 1.726607  |
| 1  | 3.958912  | 0.433868 | 2.682737  |

|   |           |           |           |
|---|-----------|-----------|-----------|
| 1 | 2.824740  | -0.619426 | 1.862262  |
| 1 | 4.219142  | -0.000775 | 0.997546  |
| 6 | 0.384606  | 5.016195  | -1.230813 |
| 1 | 0.979861  | 5.862552  | -1.598002 |
| 1 | 0.767458  | 4.118849  | -1.725726 |
| 1 | -0.629291 | 5.183021  | -1.620712 |
| 6 | -0.845884 | 6.643128  | 1.239498  |
| 1 | -0.218947 | 7.542082  | 1.170272  |
| 1 | -1.657762 | 6.782784  | 0.515179  |
| 1 | -1.303366 | 6.670721  | 2.235041  |

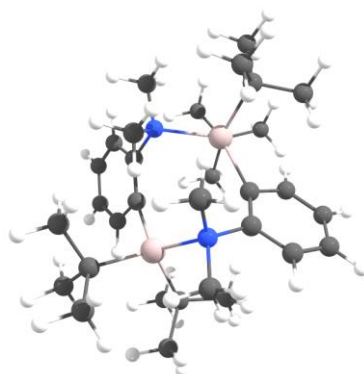

**Figure S92:** Computed structure of CH<sub>3</sub>/*t*-but.

Data for system: **CH<sub>3</sub>/*t*-but**

#p m062x/6-31g(d,p) scf=(maxcycles=100) int=ultrafine nosymm freq opt

--Link1--

#p m062x/def2tzvp scf=(maxcycles=100) int=ultrafine nosymm guess=read geom=check  
SCRF=(Solvent=benzene,SMD)

SCF Done: E(RM062X) = -1847.36050163 A.U.  
Zero-point correction= 0.830963 (Hartree/Particle)  
Thermal correction to Energy= 0.872950  
Thermal correction to Enthalpy= 0.873894  
Thermal correction to Gibbs Free Energy= 0.763209

Optimized Geometry (XYZ coordinates in Angstrom)

|    |           |           |           |
|----|-----------|-----------|-----------|
| 6  | 0.224853  | 2.294982  | 0.001624  |
| 6  | 1.219152  | 1.391635  | 0.441542  |
| 13 | 2.050098  | -0.450790 | -0.009382 |
| 7  | -0.804300 | 1.840021  | -0.961706 |
| 6  | -1.248338 | -1.438024 | 0.325801  |
| 6  | -0.353008 | -2.383576 | -0.209946 |
| 7  | 0.779685  | -1.938979 | -1.058854 |
| 13 | -2.066174 | 0.428477  | 0.042922  |
| 6  | 3.575255  | 0.077187  | -1.314869 |
| 6  | 2.700298  | -1.536708 | 1.643292  |
| 6  | -2.551483 | 1.296051  | 1.856847  |
| 6  | -3.675122 | 0.172953  | -1.216403 |
| 6  | 4.351131  | -1.034021 | -2.043033 |
| 1  | 4.674523  | -1.843945 | -1.379868 |
| 1  | 3.774092  | -1.473566 | -2.866297 |
| 1  | 5.258709  | -0.614264 | -2.503212 |
| 6  | 4.606425  | 0.810755  | -0.425783 |
| 1  | 4.217749  | 1.760816  | -0.049255 |

|   |           |           |           |
|---|-----------|-----------|-----------|
| 1 | 4.940193  | 0.218893  | 0.433670  |
| 1 | 5.502698  | 1.048140  | -1.019150 |
| 6 | 3.174411  | 1.098752  | -2.391006 |
| 1 | 2.520750  | 0.669243  | -3.161866 |
| 1 | 2.667549  | 1.969312  | -1.959383 |
| 1 | 4.070852  | 1.469248  | -2.912512 |
| 6 | 3.104457  | -0.648088 | 2.839339  |
| 1 | 2.277885  | -0.028358 | 3.201895  |
| 1 | 3.416901  | -1.294763 | 3.672733  |
| 1 | 3.958733  | 0.003008  | 2.620247  |
| 6 | 1.651418  | -2.502821 | 2.228471  |
| 1 | 0.693359  | -2.013980 | 2.439778  |
| 1 | 1.439332  | -3.357355 | 1.583131  |
| 1 | 2.027795  | -2.918596 | 3.175517  |
| 6 | 3.963607  | -2.366925 | 1.329795  |
| 1 | 4.271349  | -2.921846 | 2.229559  |
| 1 | 3.829068  | -3.109366 | 0.537424  |
| 1 | 4.812011  | -1.739756 | 1.038196  |
| 6 | -3.828499 | 0.698906  | 2.499240  |
| 1 | -4.683418 | 0.663237  | 1.815571  |
| 1 | -3.687379 | -0.303147 | 2.912497  |
| 1 | -4.128261 | 1.326391  | 3.351783  |
| 6 | -2.854097 | 2.804975  | 1.780686  |
| 1 | -3.693253 | 3.031186  | 1.110099  |
| 1 | -3.140094 | 3.173702  | 2.777506  |
| 1 | -1.988429 | 3.395324  | 1.476579  |
| 6 | -1.408275 | 1.110005  | 2.871094  |
| 1 | -1.716726 | 1.471739  | 3.864730  |
| 1 | -1.124156 | 0.055860  | 2.979863  |
| 1 | -0.508720 | 1.666639  | 2.586278  |
| 6 | -4.413234 | -1.105723 | -0.768604 |
| 1 | -5.321251 | -1.241380 | -1.376908 |
| 1 | -3.799120 | -2.003854 | -0.888813 |
| 1 | -4.734106 | -1.064459 | 0.278572  |
| 6 | -4.710127 | 1.309604  | -1.121679 |
| 1 | -5.602512 | 1.057758  | -1.716298 |
| 1 | -5.048035 | 1.472250  | -0.093217 |
| 1 | -4.346905 | 2.271221  | -1.497766 |
| 6 | -3.352648 | -0.045790 | -2.703459 |
| 1 | -2.663078 | -0.885169 | -2.856726 |
| 1 | -4.271520 | -0.292018 | -3.259009 |
| 1 | -2.928689 | 0.835808  | -3.199271 |
| 6 | -0.105883 | 1.435455  | -2.203674 |
| 1 | 0.671338  | 0.719588  | -1.972469 |
| 1 | -0.820366 | 1.010083  | -2.909048 |
| 1 | 0.368444  | 2.318225  | -2.647910 |
| 6 | -1.742391 | 2.905458  | -1.396418 |
| 1 | -2.391080 | 2.479737  | -2.158313 |
| 1 | -2.355307 | 3.256610  | -0.569613 |
| 1 | -1.189186 | 3.742916  | -1.833956 |
| 6 | 0.239149  | -1.630478 | -2.405950 |
| 1 | 1.015206  | -1.171076 | -3.025486 |
| 1 | -0.099210 | -2.561812 | -2.875090 |
| 1 | -0.615245 | -0.969185 | -2.312909 |
| 6 | 1.783144  | -3.012037 | -1.275522 |
| 1 | 2.100984  | -3.424637 | -0.322585 |
| 1 | 1.372437  | -3.811488 | -1.900073 |
| 1 | 2.639543  | -2.586635 | -1.788649 |
| 6 | 2.127064  | 1.963703  | 1.354924  |
| 1 | 2.942677  | 1.361063  | 1.726280  |



|   |           |           |           |
|---|-----------|-----------|-----------|
| 6 | 2.083936  | 3.276218  | 1.819240  |
| 1 | 2.823662  | 3.624442  | 2.532885  |
| 6 | 0.182299  | 3.626812  | 0.422213  |
| 1 | -0.574317 | 4.306301  | 0.055761  |
| 6 | 1.097940  | 4.120633  | 1.344137  |
| 1 | 1.032039  | 5.153831  | 1.668286  |
| 6 | -2.173120 | -1.994869 | 1.233664  |
| 1 | -2.885053 | -1.336838 | 1.712673  |
| 6 | -2.281722 | -3.345777 | 1.546784  |
| 1 | -3.024606 | -3.681841 | 2.262988  |
| 6 | -0.489432 | -3.755354 | 0.026728  |
| 1 | 0.175957  | -4.473263 | -0.432408 |
| 6 | -1.449413 | -4.244327 | 0.903325  |
| 1 | -1.520830 | -5.311662 | 1.084473  |

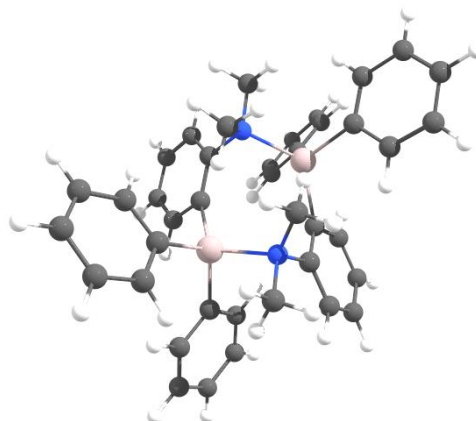

**Figure S93:** Computed structure of CH<sub>3</sub>/Ph.

Data for system: **CH<sub>3</sub>/Ph**

```
#p m062x/6-31g(d,p) scf=(maxcycles=100) int=ultrafine nosymm freq opt
```

--Link1--

```
#p m062x/def2tzvp scf=(maxcycles=100) int=ultrafine nosymm guess=read geom=check
SCRF=(Solvent=benzene,SMD)
```

SCF Done: E(RM062X) = -2142.69122584 A.U.

Zero-point correction= 0.703307 (Hartree/Particle)

Thermal correction to Energy= 0.743120

Thermal correction to Enthalpy= 0.744065

Thermal correction to Gibbs Free Energy= 0.631215

Optimized Geometry (XYZ coordinates in Angstrom)

|    |           |          |           |
|----|-----------|----------|-----------|
| 6  | 2.993954  | 4.765844 | 1.790631  |
| 6  | 1.762538  | 5.094967 | 1.190571  |
| 13 | -0.202473 | 5.026007 | 1.646159  |
| 7  | 2.995971  | 3.892086 | 2.986268  |
| 6  | 1.860882  | 5.856513 | 0.008224  |
| 1  | 0.948896  | 6.136940 | -0.513928 |
| 6  | 3.070790  | 6.268698 | -0.547343 |
| 1  | 3.079045  | 6.848061 | -1.464915 |
| 6  | 4.215494  | 5.171660 | 1.252284  |
| 1  | 5.156003  | 4.886735 | 1.702822  |
| 6  | 4.254749  | 5.924133 | 0.082622  |

|    |           |           |           |
|----|-----------|-----------|-----------|
| 1  | 5.214078  | 6.219680  | -0.329076 |
| 6  | -1.638856 | 0.684100  | 0.009605  |
| 6  | -0.354980 | 0.239294  | -0.256962 |
| 1  | -0.177503 | -0.526311 | -1.005308 |
| 1  | -2.492520 | 0.282584  | -0.526308 |
| 6  | -1.836713 | 1.674327  | 0.966802  |
| 6  | 0.714752  | 0.792160  | 0.444792  |
| 1  | 1.711370  | 0.426886  | 0.207532  |
| 6  | 0.572138  | 1.795353  | 1.425065  |
| 6  | -0.752039 | 2.217131  | 1.656455  |
| 1  | -2.845590 | 2.027478  | 1.128620  |
| 7  | -0.993006 | 3.329137  | 2.604225  |
| 13 | 2.392943  | 2.008705  | 2.270143  |
| 6  | 4.353716  | 3.625392  | 3.526174  |
| 1  | 4.850639  | 4.567811  | 3.778369  |
| 1  | 4.236030  | 3.031759  | 4.431986  |
| 1  | 4.950019  | 3.068002  | 2.802177  |
| 6  | 2.249569  | 4.518327  | 4.104392  |
| 1  | 1.262947  | 4.843321  | 3.789708  |
| 1  | 2.159319  | 3.793748  | 4.917433  |
| 1  | 2.797131  | 5.399843  | 4.456192  |
| 6  | -2.428806 | 3.674614  | 2.763768  |
| 1  | -2.838731 | 4.047603  | 1.823938  |
| 1  | -2.992112 | 2.797971  | 3.099632  |
| 1  | -2.496718 | 4.453270  | 3.522606  |
| 6  | -0.524722 | 2.977349  | 3.966804  |
| 1  | -1.157934 | 2.180321  | 4.372374  |
| 1  | 0.498286  | 2.614909  | 3.953444  |
| 1  | -0.596045 | 3.862617  | 4.603517  |
| 6  | -0.620393 | 6.550778  | 2.873855  |
| 6  | -1.914220 | 6.989998  | 3.217527  |
| 6  | 0.437038  | 7.354223  | 3.341926  |
| 6  | -2.140162 | 8.123128  | 3.996868  |
| 6  | 0.229880  | 8.490427  | 4.122429  |
| 6  | -1.064040 | 8.874290  | 4.460621  |
| 1  | -2.786829 | 6.450946  | 2.852694  |
| 1  | 1.461074  | 7.095883  | 3.074391  |
| 1  | -3.156298 | 8.423410  | 4.235754  |
| 1  | 1.077611  | 9.079591  | 4.460296  |
| 1  | -1.233692 | 9.757718  | 5.068544  |
| 6  | -1.269930 | 4.988663  | -0.026247 |
| 6  | -1.025867 | 4.062160  | -1.058402 |
| 6  | -2.287112 | 5.930592  | -0.259050 |
| 6  | -1.763503 | 4.061037  | -2.238973 |
| 6  | -3.034612 | 5.940526  | -1.437795 |
| 6  | -2.775425 | 5.000696  | -2.429820 |
| 1  | -0.240860 | 3.314726  | -0.937495 |
| 1  | -2.498871 | 6.688866  | 0.493750  |
| 1  | -1.549716 | 3.327140  | -3.010863 |
| 1  | -3.813586 | 6.683785  | -1.582084 |
| 1  | -3.353121 | 5.002676  | -3.349452 |
| 6  | 3.797445  | 1.713830  | 0.899486  |
| 6  | 4.830396  | 0.781860  | 1.100707  |
| 6  | 3.793584  | 2.387114  | -0.337422 |
| 6  | 5.815847  | 0.546575  | 0.140534  |
| 6  | 4.769702  | 2.161845  | -1.303882 |
| 6  | 5.788603  | 1.241197  | -1.064255 |
| 1  | 4.865573  | 0.211561  | 2.028131  |
| 1  | 3.009789  | 3.114105  | -0.553368 |
| 1  | 6.599448  | -0.181030 | 0.331853  |

|   |          |           |           |
|---|----------|-----------|-----------|
| 1 | 4.736645 | 2.704683  | -2.244285 |
| 1 | 6.552306 | 1.063093  | -1.815587 |
| 6 | 2.498470 | 0.797220  | 3.859870  |
| 6 | 3.676224 | 0.475106  | 4.562849  |
| 6 | 1.345819 | 0.089429  | 4.251305  |
| 6 | 3.700583 | -0.454705 | 5.600702  |
| 6 | 1.351521 | -0.843477 | 5.287018  |
| 6 | 2.531738 | -1.112446 | 5.972984  |
| 1 | 4.619778 | 0.943095  | 4.287524  |
| 1 | 0.410638 | 0.257930  | 3.718399  |
| 1 | 4.633306 | -0.670912 | 6.113568  |
| 1 | 0.436773 | -1.365170 | 5.553496  |
| 1 | 2.544275 | -1.837270 | 6.781230  |

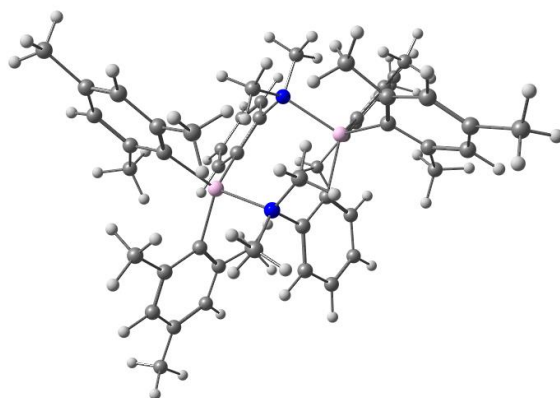

**Figure S94:** Computed structure of CH<sub>3</sub>/Mes.

Data for system: CH<sub>3</sub>/Mes

```
#p m062x/6-31g(d,p) scf=(maxcycles=100) int=ultrafine nosymm freq opt
```

```
--Link1--
```

```
#p m062x/def2tzvp scf=(maxcycles=100) int=ultrafine nosymm guess=read geom=check
SCRF=(Solvent=benzene,SMD)
```

```
SCF Done: E(RM062X) = -2614.36239940 A.U.
Zero-point correction=          1.040653 (Hartree/Particle)
Thermal correction to Energy=      1.098880
Thermal correction to Enthalpy=     1.099824
Thermal correction to Gibbs Free Energy=  0.950513
```

Optimized Geometry (XYZ coordinates in Angstrom)

|    |           |          |           |
|----|-----------|----------|-----------|
| 6  | 2.926335  | 4.611472 | 1.533584  |
| 6  | 1.680724  | 5.040608 | 1.023228  |
| 13 | -0.240421 | 5.203478 | 1.692259  |
| 7  | 2.988774  | 3.920824 | 2.850063  |
| 6  | 1.760342  | 5.704298 | -0.216827 |
| 1  | 0.840711  | 6.055937 | -0.675569 |
| 6  | 2.943998  | 5.953444 | -0.905432 |
| 1  | 2.922743  | 6.481137 | -1.853939 |
| 6  | 4.125648  | 4.831337 | 0.849590  |
| 1  | 5.068797  | 4.464367 | 1.227558  |
| 6  | 4.138009  | 5.508961 | -0.364088 |
| 1  | 5.081588  | 5.666755 | -0.876574 |

|    |           |           |           |
|----|-----------|-----------|-----------|
| 6  | -1.419193 | 0.985998  | -0.460264 |
| 6  | -0.148251 | 0.459961  | -0.616202 |
| 1  | 0.064060  | -0.266614 | -1.394398 |
| 1  | -2.233255 | 0.694482  | -1.116163 |
| 6  | -1.652201 | 1.918995  | 0.543513  |
| 6  | 0.864403  | 0.885608  | 0.238568  |
| 1  | 1.852118  | 0.462066  | 0.080686  |
| 6  | 0.690848  | 1.812712  | 1.284992  |
| 6  | -0.624009 | 2.315412  | 1.403795  |
| 1  | -2.645054 | 2.338464  | 0.616190  |
| 7  | -0.951567 | 3.282671  | 2.486004  |
| 13 | 2.416534  | 1.852013  | 2.373230  |
| 6  | 4.380344  | 3.852889  | 3.375071  |
| 1  | 4.808816  | 4.859857  | 3.420071  |
| 1  | 4.350810  | 3.437911  | 4.381149  |
| 1  | 4.998954  | 3.209386  | 2.753963  |
| 6  | 2.248195  | 4.772912  | 3.820007  |
| 1  | 1.179080  | 4.710416  | 3.660783  |
| 1  | 2.466751  | 4.450736  | 4.834671  |
| 1  | 2.543784  | 5.818488  | 3.691177  |
| 6  | -2.421537 | 3.431465  | 2.670065  |
| 1  | -2.875904 | 3.902751  | 1.801621  |
| 1  | -2.873958 | 2.449922  | 2.847532  |
| 1  | -2.599156 | 4.063437  | 3.538613  |
| 6  | -0.456275 | 2.691398  | 3.759087  |
| 1  | -0.728939 | 1.632817  | 3.803900  |
| 1  | 0.622274  | 2.758594  | 3.829563  |
| 1  | -0.891199 | 3.219661  | 4.603368  |
| 6  | -0.189493 | 6.813440  | 2.976512  |
| 6  | -0.313046 | 6.865587  | 4.388272  |
| 6  | 0.140808  | 8.050656  | 2.359227  |
| 6  | -0.042006 | 8.026479  | 5.116116  |
| 6  | 0.404910  | 9.200327  | 3.112466  |
| 6  | 0.347288  | 9.209456  | 4.498698  |
| 1  | -0.156932 | 8.008934  | 6.198711  |
| 1  | 0.651638  | 10.121901 | 2.587408  |
| 6  | -1.614208 | 5.335963  | 0.198796  |
| 6  | -1.498779 | 4.743634  | -1.084706 |
| 6  | -2.806451 | 6.084635  | 0.432704  |
| 6  | -2.506590 | 4.900175  | -2.047517 |
| 6  | -3.790512 | 6.214396  | -0.546245 |
| 6  | -3.657617 | 5.632908  | -1.805678 |
| 1  | -2.378919 | 4.420792  | -3.017053 |
| 1  | -4.689483 | 6.785586  | -0.320232 |
| 6  | 4.077088  | 1.422488  | 1.281369  |
| 6  | 5.171344  | 0.775050  | 1.929440  |
| 6  | 4.256855  | 1.709473  | -0.095856 |
| 6  | 6.340449  | 0.453982  | 1.241330  |
| 6  | 5.445016  | 1.366377  | -0.757589 |
| 6  | 6.497799  | 0.735254  | -0.114475 |
| 1  | 7.154780  | -0.029555 | 1.778511  |
| 1  | 5.542164  | 1.613027  | -1.813928 |
| 6  | 2.046576  | 0.571361  | 3.943600  |
| 6  | 1.858599  | 0.841621  | 5.322924  |
| 6  | 1.822850  | -0.779925 | 3.563432  |
| 6  | 1.400679  | -0.130068 | 6.215569  |
| 6  | 1.366288  | -1.734989 | 4.479076  |
| 6  | 1.119426  | -1.429455 | 5.809820  |
| 1  | 1.278026  | 0.133933  | 7.264782  |
| 1  | 1.213160  | -2.756321 | 4.133703  |

|   |           |           |           |
|---|-----------|-----------|-----------|
| 6 | 0.675567  | 10.444304 | 5.296149  |
| 1 | 0.108511  | 10.475745 | 6.230048  |
| 1 | 1.739186  | 10.471526 | 5.556127  |
| 1 | 0.453243  | 11.351988 | 4.729571  |
| 6 | -0.783511 | 5.690745  | 5.213200  |
| 1 | -1.609239 | 5.171989  | 4.723636  |
| 1 | 0.011856  | 4.961601  | 5.405385  |
| 1 | -1.147517 | 6.023716  | 6.187984  |
| 6 | 0.200902  | 8.251781  | 0.858785  |
| 1 | 1.215069  | 8.103748  | 0.475754  |
| 1 | -0.467548 | 7.581511  | 0.313142  |
| 1 | -0.096055 | 9.274491  | 0.610775  |
| 6 | -3.086047 | 6.796924  | 1.741553  |
| 1 | -4.144159 | 7.061544  | 1.811201  |
| 1 | -2.833453 | 6.197363  | 2.620256  |
| 1 | -2.502874 | 7.718949  | 1.829780  |
| 6 | -0.320726 | 3.910273  | -1.549500 |
| 1 | 0.288883  | 3.526580  | -0.732863 |
| 1 | -0.676777 | 3.053227  | -2.126657 |
| 1 | 0.335882  | 4.491609  | -2.206831 |
| 6 | -4.724745 | 5.804687  | -2.855105 |
| 1 | -4.568410 | 5.123383  | -3.694616 |
| 1 | -5.719928 | 5.616434  | -2.441980 |
| 1 | -4.724617 | 6.826336  | -3.248798 |
| 6 | 2.174334  | 2.181408  | 5.945193  |
| 1 | 2.326157  | 2.081179  | 7.022471  |
| 1 | 3.092049  | 2.600481  | 5.530106  |
| 1 | 1.370817  | 2.913975  | 5.806412  |
| 6 | 2.087768  | -1.316018 | 2.171389  |
| 1 | 2.873724  | -0.767132 | 1.647236  |
| 1 | 2.409612  | -2.359287 | 2.232384  |
| 1 | 1.185437  | -1.287852 | 1.553130  |
| 6 | 0.587698  | -2.458482 | 6.772583  |
| 1 | -0.506960 | -2.437881 | 6.802828  |
| 1 | 0.888769  | -3.467348 | 6.479627  |
| 1 | 0.947481  | -2.274768 | 7.788251  |
| 6 | 5.142720  | 0.381293  | 3.393261  |
| 1 | 4.531731  | -0.511936 | 3.557243  |
| 1 | 6.153614  | 0.165738  | 3.748369  |
| 1 | 4.720266  | 1.156099  | 4.038770  |
| 6 | 3.228064  | 2.387996  | -0.978764 |
| 1 | 3.721292  | 3.102885  | -1.642146 |
| 1 | 2.715019  | 1.657998  | -1.615217 |
| 1 | 2.465694  | 2.928957  | -0.420229 |
| 6 | 7.762287  | 0.359560  | -0.842145 |
| 1 | 8.648752  | 0.663661  | -0.278055 |
| 1 | 7.823932  | -0.724311 | -0.984100 |
| 1 | 7.806626  | 0.828515  | -1.827788 |

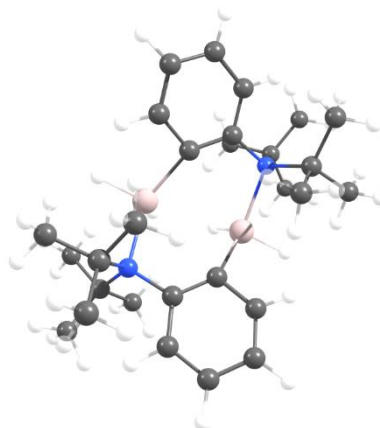

**Figure S95:** Computed structure of t-but/H

Data for system: **t-but/H**

```
#p m062x/6-31g(d,p) scf=(maxcycles=100) int=ultrafine nosymm freq opt
```

```
--Link1--
```

```
#p m062x/def2tzvp scf=(maxcycles=100) int=ultrafine nosymm guess=read geom=check
SCRF=(Solvent=benzene,SMD)
```

```
SCF Done: E(RM062X) = -1690.04246021 A.U.
Zero-point correction=          0.709692 (Hartree/Particle)
Thermal correction to Energy=    0.744507
Thermal correction to Enthalpy=  0.745451
Thermal correction to Gibbs Free Energy=  0.649737
```

Optimized Geometry (XYZ coordinates in Angstrom)

|    |           |           |           |
|----|-----------|-----------|-----------|
| 6  | 3.143690  | 5.057882  | 2.182138  |
| 6  | 1.735732  | 5.113425  | 2.098441  |
| 13 | 0.174861  | 4.236380  | 1.057917  |
| 7  | 3.937990  | 3.818730  | 1.881326  |
| 6  | 1.171495  | 6.345767  | 2.523471  |
| 1  | 0.093634  | 6.460584  | 2.484054  |
| 6  | 1.887927  | 7.456924  | 2.940884  |
| 1  | 1.368520  | 8.359930  | 3.245635  |
| 6  | 3.871044  | 6.202714  | 2.545449  |
| 1  | 4.944433  | 6.175212  | 2.556862  |
| 6  | 3.270511  | 7.393178  | 2.919410  |
| 1  | 3.885065  | 8.245235  | 3.191764  |
| 1  | -0.854219 | 5.434967  | 1.040029  |
| 1  | 0.579526  | 3.782128  | -0.389627 |
| 6  | -0.617308 | -0.755018 | 3.238778  |
| 6  | 0.760790  | -0.813282 | 3.354823  |
| 1  | 1.255310  | -1.676689 | 3.788471  |
| 1  | -1.252047 | -1.573575 | 3.562727  |
| 6  | -1.187071 | 0.386330  | 2.699904  |
| 6  | 1.507830  | 0.247438  | 2.865720  |
| 1  | 2.585426  | 0.131399  | 2.908166  |
| 6  | 0.977751  | 1.424958  | 2.274042  |
| 6  | -0.432457 | 1.486139  | 2.261047  |
| 1  | -2.258870 | 0.412355  | 2.639257  |
| 7  | -1.200207 | 2.682521  | 1.775492  |
| 13 | 2.607984  | 2.188007  | 1.248739  |
| 1  | 2.305116  | 2.472492  | -0.265794 |

|   |           |          |           |
|---|-----------|----------|-----------|
| 1 | 3.634103  | 1.001429 | 1.435214  |
| 6 | 4.867332  | 4.060620 | 0.627192  |
| 6 | 4.631028  | 3.335735 | 3.213744  |
| 6 | -2.045801 | 2.301845 | 0.496522  |
| 6 | -1.977639 | 3.305735 | 2.998314  |
| 6 | 5.249240  | 2.742981 | -0.082027 |
| 1 | 5.791715  | 2.047072 | 0.552908  |
| 1 | 4.389971  | 2.234500 | -0.514113 |
| 1 | 5.908397  | 3.013105 | -0.911515 |
| 6 | 6.205863  | 4.776540 | 0.898137  |
| 1 | 6.105254  | 5.798798 | 1.256433  |
| 1 | 6.861505  | 4.218451 | 1.567009  |
| 1 | 6.719903  | 4.843542 | -0.064558 |
| 6 | 4.080165  | 4.906481 | -0.389430 |
| 1 | 4.626623  | 4.887745 | -1.336445 |
| 1 | 3.082080  | 4.498775 | -0.567148 |
| 1 | 3.983975  | 5.946318 | -0.073392 |
| 6 | 3.503834  | 2.866713 | 4.144182  |
| 1 | 2.716851  | 3.620504 | 4.234493  |
| 1 | 3.057154  | 1.929101 | 3.815837  |
| 1 | 3.920128  | 2.690326 | 5.139780  |
| 6 | 5.424684  | 4.385149 | 4.027374  |
| 1 | 4.784293  | 5.138377 | 4.484781  |
| 1 | 5.905780  | 3.833046 | 4.839337  |
| 1 | 6.219049  | 4.876493 | 3.466246  |
| 6 | 5.605739  | 2.164446 | 3.004560  |
| 1 | 5.852385  | 1.777788 | 3.997645  |
| 1 | 5.170672  | 1.352423 | 2.429321  |
| 1 | 6.544262  | 2.480086 | 2.544837  |
| 6 | -2.829257 | 2.350299 | 3.867518  |
| 1 | -3.588362 | 1.799383 | 3.312824  |
| 1 | -2.224787 | 1.652656 | 4.445944  |
| 1 | -3.359131 | 2.987430 | 4.580863  |
| 6 | -2.929725 | 4.445425 | 2.598028  |
| 1 | -2.451916 | 5.191289 | 1.969502  |
| 1 | -3.836162 | 4.080018 | 2.111664  |
| 1 | -3.241732 | 4.936668 | 3.524248  |
| 6 | -0.912323 | 3.875470 | 3.945209  |
| 1 | -1.393693 | 4.162350 | 4.884132  |
| 1 | -0.139524 | 3.136004 | 4.172483  |
| 1 | -0.436667 | 4.770154 | 3.545600  |
| 6 | -3.402551 | 1.616905 | 0.756080  |
| 1 | -3.851889 | 1.441277 | -0.225128 |
| 1 | -3.330707 | 0.641499 | 1.232307  |
| 1 | -4.098321 | 2.244619 | 1.313372  |
| 6 | -1.197625 | 1.351202 | -0.366937 |
| 1 | -1.126703 | 0.352836 | 0.067376  |
| 1 | -1.681279 | 1.263848 | -1.343812 |
| 1 | -0.188420 | 1.739935 | -0.523021 |
| 6 | -2.373763 | 3.532398 | -0.377235 |
| 1 | -2.981254 | 3.171426 | -1.211631 |
| 1 | -2.950255 | 4.294647 | 0.140896  |
| 1 | -1.485590 | 3.990006 | -0.807920 |

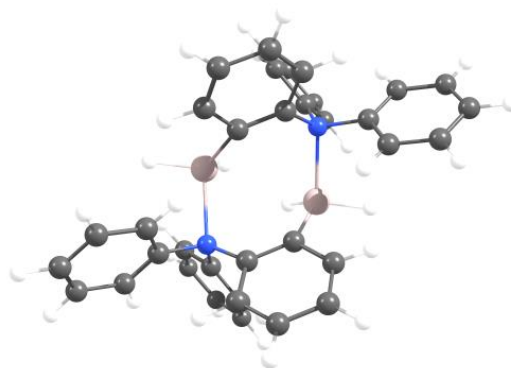

**Figure S96:** Computed structure of Ph/H

Data for system: **Ph/H**

```
#p m062x/6-31g(d,p) scf=(maxcycles=100) int=ultrafine nosymm freq opt
```

--Link1--

```
#p m062x/def2tzvp scf=(maxcycles=500) int=ultrafine nosymm guess=read geom=check
SCRF=(Solvent=benzene,SMD)
```

SCF Done: E(UM062X) = -1985.37228542 A.U.

Zero-point correction= 0.574615 (Hartree/Particle)

Thermal correction to Energy= 0.608451

Thermal correction to Enthalpy= 0.609395

Thermal correction to Gibbs Free Energy= 0.509045

Optimized Geometry (XYZ coordinates in Angstrom)

|    |           |           |           |
|----|-----------|-----------|-----------|
| 6  | 2.945664  | 4.426828  | 2.185560  |
| 6  | 1.638442  | 4.921001  | 2.065748  |
| 13 | 0.232930  | 4.573747  | 0.684458  |
| 7  | 3.423268  | 3.333698  | 1.284313  |
| 6  | 1.332148  | 6.031266  | 2.877722  |
| 1  | 0.345229  | 6.481227  | 2.787531  |
| 6  | 2.235987  | 6.604607  | 3.767875  |
| 1  | 1.944209  | 7.456241  | 4.374465  |
| 6  | 3.880562  | 5.010888  | 3.044368  |
| 1  | 4.896964  | 4.638801  | 3.088638  |
| 6  | 3.521698  | 6.088674  | 3.846753  |
| 1  | 4.258117  | 6.527446  | 4.512231  |
| 1  | -0.789316 | 5.792078  | 0.657136  |
| 1  | 0.744260  | 4.065308  | -0.713952 |
| 6  | -1.013558 | 0.911334  | 4.610509  |
| 6  | 0.265975  | 0.379060  | 4.539961  |
| 1  | 0.615129  | -0.321554 | 5.292023  |
| 1  | -1.688059 | 0.635610  | 5.414680  |
| 6  | -1.447747 | 1.790691  | 3.624397  |
| 6  | 1.087309  | 0.735278  | 3.473965  |
| 1  | 2.067545  | 0.267642  | 3.402790  |
| 6  | 0.704345  | 1.643736  | 2.466974  |
| 6  | -0.592800 | 2.164241  | 2.584192  |
| 1  | -2.460209 | 2.173180  | 3.670516  |
| 7  | -1.153503 | 3.039960  | 1.509928  |
| 13 | 1.987989  | 1.666902  | 0.931859  |
| 1  | 1.358928  | 1.858296  | -0.497530 |
| 1  | 3.017539  | 0.464734  | 1.089384  |



|   |           |           |           |
|---|-----------|-----------|-----------|
| 6 | 4.560059  | 2.622136  | 1.902817  |
| 6 | 4.325033  | 2.011755  | 3.137773  |
| 6 | 5.826957  | 2.570092  | 1.337197  |
| 6 | 5.341587  | 1.327834  | 3.783386  |
| 6 | 6.846044  | 1.874174  | 1.993452  |
| 6 | 6.611255  | 1.248304  | 3.208453  |
| 1 | 3.342535  | 2.097018  | 3.592137  |
| 1 | 6.034561  | 3.061782  | 0.395458  |
| 1 | 5.142472  | 0.855409  | 4.739685  |
| 1 | 7.831267  | 1.835000  | 1.540550  |
| 1 | 7.407153  | 0.708855  | 3.710513  |
| 6 | 3.739904  | 3.847717  | -0.061702 |
| 6 | 3.812503  | 5.210183  | -0.336192 |
| 6 | 3.980884  | 2.920552  | -1.078646 |
| 6 | 4.095486  | 5.638221  | -1.632992 |
| 6 | 4.267790  | 3.356940  | -2.364505 |
| 6 | 4.319052  | 4.719913  | -2.650084 |
| 1 | 3.636814  | 5.940575  | 0.443731  |
| 1 | 3.959841  | 1.856502  | -0.859407 |
| 1 | 4.137223  | 6.702596  | -1.838796 |
| 1 | 4.445504  | 2.625758  | -3.145756 |
| 1 | 4.532919  | 5.059715  | -3.657797 |
| 6 | -2.240424 | 3.880341  | 2.052054  |
| 6 | -3.550961 | 3.820148  | 1.597501  |
| 6 | -1.907854 | 4.742708  | 3.100182  |
| 6 | -4.517236 | 4.652423  | 2.169360  |
| 6 | -2.872385 | 5.561050  | 3.664092  |
| 6 | -4.186520 | 5.526058  | 3.194286  |
| 1 | -3.833191 | 3.136783  | 0.806918  |
| 1 | -0.890159 | 4.748451  | 3.478613  |
| 1 | -5.537395 | 4.601537  | 1.803299  |
| 1 | -2.597609 | 6.228584  | 4.474177  |
| 1 | -4.941978 | 6.169997  | 3.631482  |
| 6 | -1.578072 | 2.249189  | 0.339152  |
| 6 | -1.912920 | 2.936196  | -0.830425 |
| 6 | -1.661377 | 0.860454  | 0.373920  |
| 6 | -2.305053 | 2.234181  | -1.961602 |
| 6 | -2.050437 | 0.164147  | -0.770170 |
| 6 | -2.368574 | 0.842259  | -1.939228 |
| 1 | -1.882561 | 4.022230  | -0.849735 |
| 1 | -1.412970 | 0.315091  | 1.275873  |
| 1 | -2.555688 | 2.780253  | -2.864696 |
| 1 | -2.099930 | -0.919067 | -0.735981 |
| 1 | -2.665186 | 0.294276  | -2.827171 |

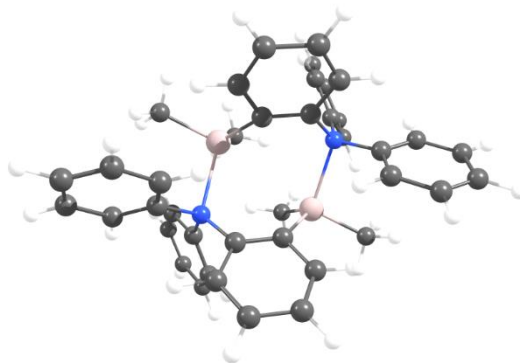

**Figure S97:** Computed structure of Ph/CH3

Data for system: **Ph/CH<sub>3</sub>**

```
#p m062x/6-31g(d,p) scf=(maxcycles=100) int=ultrafine nosymm freq opt
```

--Link1--

```
#p m062x/def2tzvp scf=(maxcycles=500) int=ultrafine nosymm guess=read geom=check  
SCRF=(Solvent=benzene,SMD)
```

```
SCF Done: E(UM062X) = -2142.65317341 A.U.  
Zero-point correction=          0.693071 (Hartree/Particle)  
Thermal correction to Energy=    0.733755  
Thermal correction to Enthalpy=   0.734699  
Thermal correction to Gibbs Free Energy= 0.623690
```

Optimized Geometry (XYZ coordinates in Angstrom)

|    |           |           |           |
|----|-----------|-----------|-----------|
| 6  | 2.866589  | 4.522025  | 2.071967  |
| 6  | 1.549615  | 4.980746  | 1.939794  |
| 13 | 0.129707  | 4.659423  | 0.554222  |
| 7  | 3.388624  | 3.390026  | 1.249513  |
| 6  | 1.228133  | 6.109619  | 2.727826  |
| 1  | 0.223709  | 6.520475  | 2.658689  |
| 6  | 2.127099  | 6.742741  | 3.578766  |
| 1  | 1.816000  | 7.604141  | 4.161682  |
| 6  | 3.799973  | 5.173221  | 2.887953  |
| 1  | 4.825158  | 4.823238  | 2.927403  |
| 6  | 3.432871  | 6.274579  | 3.648407  |
| 1  | 4.169884  | 6.763435  | 4.277320  |
| 6  | -0.946171 | 0.758037  | 4.551164  |
| 6  | 0.350552  | 0.270393  | 4.452296  |
| 1  | 0.734758  | -0.433152 | 5.184421  |
| 1  | -1.603978 | 0.440104  | 5.353611  |
| 6  | -1.408589 | 1.653774  | 3.597296  |
| 6  | 1.143045  | 0.673799  | 3.383579  |
| 1  | 2.139511  | 0.245642  | 3.304316  |
| 6  | 0.722676  | 1.589360  | 2.391766  |
| 6  | -0.578090 | 2.083194  | 2.554629  |
| 1  | -2.428214 | 2.015664  | 3.664515  |
| 7  | -1.201141 | 2.996651  | 1.550866  |
| 13 | 1.979261  | 1.559586  | 0.823169  |
| 6  | 4.425509  | 2.668872  | 2.008844  |
| 6  | 4.075658  | 2.230813  | 3.291038  |
| 6  | 5.702564  | 2.415173  | 1.523974  |
| 6  | 4.977408  | 1.508204  | 4.054855  |
| 6  | 6.604135  | 1.682161  | 2.300100  |
| 6  | 6.249428  | 1.218326  | 3.558066  |
| 1  | 3.090054  | 2.463285  | 3.680210  |
| 1  | 6.010913  | 2.776340  | 0.551785  |
| 1  | 4.683539  | 1.168615  | 5.042903  |
| 1  | 7.595186  | 1.483968  | 1.905096  |
| 1  | 6.954629  | 0.647320  | 4.152272  |
| 6  | 3.831645  | 3.859574  | -0.070997 |
| 6  | 3.889487  | 5.213879  | -0.395139 |
| 6  | 4.166628  | 2.910003  | -1.040947 |
| 6  | 4.248273  | 5.604716  | -1.684529 |
| 6  | 4.528359  | 3.308795  | -2.320895 |
| 6  | 4.562651  | 4.661210  | -2.653303 |
| 1  | 3.633710  | 5.968607  | 0.337386  |
| 1  | 4.149394  | 1.854654  | -0.790553 |

|   |           |           |           |
|---|-----------|-----------|-----------|
| 1 | 4.272060  | 6.662496  | -1.924906 |
| 1 | 4.775274  | 2.554689  | -3.060860 |
| 1 | 4.831983  | 4.972491  | -3.656801 |
| 6 | -2.159006 | 3.889224  | 2.227139  |
| 6 | -3.484079 | 4.038585  | 1.836886  |
| 6 | -1.678859 | 4.611532  | 3.325440  |
| 6 | -4.306239 | 4.944558  | 2.511904  |
| 6 | -2.502496 | 5.504296  | 3.991278  |
| 6 | -3.824272 | 5.685772  | 3.580465  |
| 1 | -3.890870 | 3.463437  | 1.015661  |
| 1 | -0.654069 | 4.464724  | 3.649740  |
| 1 | -5.336504 | 5.057257  | 2.190462  |
| 1 | -2.108342 | 6.062353  | 4.834571  |
| 1 | -4.468766 | 6.388988  | 4.096758  |
| 6 | -1.778357 | 2.235615  | 0.433723  |
| 6 | -2.228829 | 2.934632  | -0.690191 |
| 6 | -1.853114 | 0.843908  | 0.445327  |
| 6 | -2.721326 | 2.250664  | -1.793691 |
| 6 | -2.343510 | 0.165373  | -0.669606 |
| 6 | -2.773145 | 0.858507  | -1.793222 |
| 1 | -2.198835 | 4.018993  | -0.698478 |
| 1 | -1.509843 | 0.279489  | 1.302811  |
| 1 | -3.056580 | 2.812690  | -2.659084 |
| 1 | -2.378897 | -0.918890 | -0.650585 |
| 1 | -3.144720 | 0.323459  | -2.660452 |
| 6 | 1.180870  | 1.360787  | -0.971478 |
| 1 | 1.894562  | 1.535972  | -1.783296 |
| 1 | 0.940902  | 0.286228  | -0.994043 |
| 1 | 0.264808  | 1.895196  | -1.219223 |
| 6 | 3.249888  | 0.038776  | 0.987310  |
| 1 | 3.910610  | -0.027499 | 1.855752  |
| 1 | 2.616937  | -0.861151 | 0.995746  |
| 1 | 3.884017  | -0.064163 | 0.097521  |
| 6 | 0.724484  | 4.424546  | -1.313341 |
| 1 | 0.949079  | 5.460687  | -1.611099 |
| 1 | 1.613232  | 3.833168  | -1.528334 |
| 1 | -0.072290 | 4.076542  | -1.979020 |
| 6 | -1.136292 | 6.191391  | 0.495449  |
| 1 | -1.866868 | 6.088904  | -0.317079 |
| 1 | -1.697378 | 6.469521  | 1.391542  |
| 1 | -0.519360 | 7.059873  | 0.220331  |

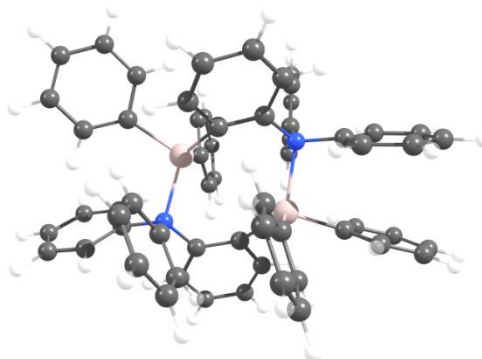

**Figure S98:** Computed structure of Ph/Ph

Data for system: **Ph/Ph**

#p m062x/6-31g(d,p) scf=(maxcycles=100) int=ultrafine nosymm freq opt

--Link1--

#p m062x/def2tzvp scf=(maxcycles=100) int=ultrafine nosymm guess=read geom=check  
SCRF=(Solvent=benzene,SMD)

SCF Done: E(RM062X) = -2909.58125478 A.U.  
Zero-point correction= 0.913504 (Hartree/Particle)  
Thermal correction to Energy= 0.966038  
Thermal correction to Enthalpy= 0.966982  
Thermal correction to Gibbs Free Energy= 0.830238

Optimized Geometry (XYZ coordinates in Angstrom)

|    |           |           |           |
|----|-----------|-----------|-----------|
| 6  | 2.757108  | 5.543456  | 2.076905  |
| 6  | 1.445010  | 5.710691  | 1.597896  |
| 13 | 0.236007  | 4.691951  | 0.276723  |
| 7  | 3.389185  | 4.193549  | 2.045974  |
| 6  | 0.928597  | 7.010285  | 1.812879  |
| 1  | -0.074813 | 7.238932  | 1.478927  |
| 6  | 1.636442  | 8.060519  | 2.384853  |
| 1  | 1.158108  | 9.024866  | 2.522397  |
| 6  | 3.525431  | 6.611510  | 2.554201  |
| 1  | 4.562712  | 6.458749  | 2.821775  |
| 6  | 2.968586  | 7.870759  | 2.719417  |
| 1  | 3.575891  | 8.682961  | 3.105502  |
| 6  | -1.352737 | -0.194003 | 1.201822  |
| 6  | -0.065397 | -0.532073 | 1.575570  |
| 1  | 0.256128  | -1.568304 | 1.603266  |
| 1  | -2.083942 | -0.950774 | 0.937425  |
| 6  | -1.710026 | 1.148913  | 1.171370  |
| 6  | 0.817182  | 0.478549  | 1.951775  |
| 1  | 1.790562  | 0.156049  | 2.294919  |
| 6  | 0.518774  | 1.860040  | 1.940065  |
| 6  | -0.789268 | 2.150662  | 1.487310  |
| 1  | -2.720518 | 1.403844  | 0.882825  |
| 7  | -1.268421 | 3.561887  | 1.346279  |
| 13 | 2.025512  | 2.773427  | 3.000158  |
| 6  | 3.813542  | 3.877514  | 0.667483  |
| 6  | 4.552142  | 4.818392  | -0.049925 |
| 6  | 3.593727  | 2.614477  | 0.138464  |
| 6  | 5.093534  | 4.475667  | -1.282876 |
| 6  | 4.159651  | 2.266786  | -1.085528 |
| 6  | 4.914849  | 3.192166  | -1.794896 |
| 1  | 4.714188  | 5.807919  | 0.363341  |
| 1  | 2.962513  | 1.902611  | 0.656900  |
| 1  | 5.665508  | 5.211595  | -1.838274 |
| 1  | 3.972472  | 1.280681  | -1.495524 |
| 1  | 5.340487  | 2.923282  | -2.756063 |
| 6  | 4.553021  | 4.054671  | 2.968907  |
| 6  | 4.454212  | 4.525124  | 4.281754  |
| 6  | 5.699365  | 3.364518  | 2.578852  |
| 6  | 5.494929  | 4.321218  | 5.178868  |
| 6  | 6.726066  | 3.145237  | 3.494188  |
| 6  | 6.635982  | 3.624996  | 4.794137  |
| 1  | 3.568846  | 5.052021  | 4.611045  |
| 1  | 5.793745  | 2.960103  | 1.579737  |
| 1  | 5.395300  | 4.699061  | 6.191139  |
| 1  | 7.597907  | 2.583182  | 3.176686  |
| 1  | 7.439924  | 3.450803  | 5.501389  |

|   |           |           |           |
|---|-----------|-----------|-----------|
| 6 | -2.488350 | 3.633889  | 0.493477  |
| 6 | -2.370698 | 3.356521  | -0.869034 |
| 6 | -3.743133 | 3.924107  | 1.028709  |
| 6 | -3.486099 | 3.421449  | -1.693949 |
| 6 | -4.856580 | 3.987849  | 0.191293  |
| 6 | -4.734678 | 3.748565  | -1.171884 |
| 1 | -1.412416 | 3.087865  | -1.295129 |
| 1 | -3.867652 | 4.109017  | 2.087682  |
| 1 | -3.368173 | 3.221501  | -2.753380 |
| 1 | -5.823886 | 4.226072  | 0.621157  |
| 1 | -5.602889 | 3.808161  | -1.819465 |
| 6 | -1.561179 | 4.172043  | 2.660173  |
| 6 | -1.800605 | 5.543855  | 2.695371  |
| 6 | -1.756178 | 3.399306  | 3.799712  |
| 6 | -2.205087 | 6.149566  | 3.877502  |
| 6 | -2.177898 | 4.011592  | 4.977988  |
| 6 | -2.397773 | 5.382704  | 5.024114  |
| 1 | -1.737329 | 6.120940  | 1.778324  |
| 1 | -1.578867 | 2.330750  | 3.779612  |
| 1 | -2.384088 | 7.219616  | 3.893526  |
| 1 | -2.310532 | 3.406891  | 5.868181  |
| 1 | -2.710446 | 5.852455  | 5.950935  |
| 6 | 3.422161  | 1.386817  | 3.518211  |
| 6 | 3.876134  | 1.407008  | 4.850589  |
| 6 | 4.083785  | 0.462214  | 2.683854  |
| 6 | 4.902775  | 0.585232  | 5.315664  |
| 6 | 5.112934  | -0.363963 | 3.128510  |
| 6 | 5.531765  | -0.305516 | 4.454121  |
| 1 | 3.433090  | 2.103850  | 5.557295  |
| 1 | 3.806362  | 0.365714  | 1.636224  |
| 1 | 5.214572  | 0.651743  | 6.354501  |
| 1 | 5.587195  | -1.053686 | 2.435860  |
| 1 | 6.334251  | -0.945590 | 4.808477  |
| 6 | 1.316152  | 3.643174  | 4.647975  |
| 6 | 0.963604  | 2.707923  | 5.641307  |
| 6 | 1.118126  | 4.995144  | 4.979209  |
| 6 | 0.486882  | 3.087166  | 6.895870  |
| 6 | 0.651312  | 5.388661  | 6.232558  |
| 6 | 0.340491  | 4.437067  | 7.200482  |
| 1 | 1.085193  | 1.641684  | 5.445047  |
| 1 | 1.333894  | 5.775316  | 4.252163  |
| 1 | 0.241740  | 2.329908  | 7.635561  |
| 1 | 0.521493  | 6.445801  | 6.448468  |
| 1 | -0.017479 | 4.744586  | 8.178824  |
| 6 | -0.672035 | 6.242608  | -0.658043 |
| 6 | 0.244240  | 7.166274  | -1.208616 |
| 6 | -2.026293 | 6.550804  | -0.874273 |
| 6 | -0.146781 | 8.283752  | -1.939972 |
| 6 | -2.437545 | 7.675825  | -1.592009 |
| 6 | -1.500285 | 8.543457  | -2.138635 |
| 1 | 1.312962  | 7.034678  | -1.035163 |
| 1 | -2.808094 | 5.913732  | -0.471703 |
| 1 | 0.603901  | 8.957035  | -2.343906 |
| 1 | -3.498874 | 7.867684  | -1.723037 |
| 1 | -1.817539 | 9.415144  | -2.703034 |
| 6 | 0.953142  | 3.494277  | -1.176520 |
| 6 | 0.800644  | 2.106321  | -1.376077 |
| 6 | 1.577122  | 4.187789  | -2.231130 |
| 6 | 1.218921  | 1.466732  | -2.541155 |
| 6 | 2.011621  | 3.558562  | -3.398065 |

|   |          |          |           |
|---|----------|----------|-----------|
| 6 | 1.828933 | 2.190737 | -3.562455 |
| 1 | 0.330190 | 1.488816 | -0.616918 |
| 1 | 1.723573 | 5.262218 | -2.163939 |
| 1 | 1.063754 | 0.396541 | -2.649058 |
| 1 | 2.487313 | 4.144376 | -4.179753 |
| 1 | 2.152263 | 1.695360 | -4.473345 |

## 5. Cartesian coordinates of systems with CF<sub>3</sub> group

### 5.1 Aminoborane

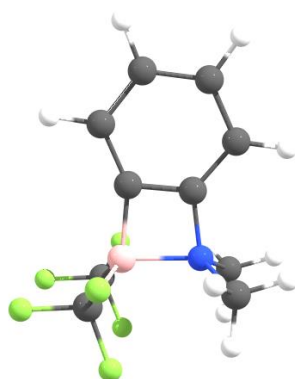

**Figure S98:** Computed structure of aminoalane CH<sub>3</sub>/CF<sub>3</sub> (monomer).

Data for system: CH<sub>3</sub>/CF<sub>3</sub> (monomer)

```
#p m062x/6-31g(d,p) scf=(maxcycles=100) int=ultrafine nosymm freq opt
```

```
--Link1--
```

```
#p m062x/def2tzvp scf=(maxcycles=100) int=ultrafine nosymm guess=read geom=check
SCRF=(Solvent=benzene,SMD)
```

SCF Done: E(RM062X) = -1065.84180222 A.U.

Zero-point correction= 0.202039 (Hartree/Particle)

Thermal correction to Energy= 0.218225

Thermal correction to Enthalpy= 0.219169

Thermal correction to Gibbs Free Energy= 0.158143

Optimized Geometry (XYZ coordinates in Angstrom)

|   |           |           |           |
|---|-----------|-----------|-----------|
| 6 | -1.325942 | 1.897681  | 0.596930  |
| 6 | -0.018617 | 1.986282  | 1.036782  |
| 5 | 0.251052  | 0.470159  | 0.599831  |
| 7 | -1.378835 | 0.508779  | 0.103576  |
| 6 | 0.412462  | 3.189262  | 1.584724  |
| 1 | 1.425816  | 3.324238  | 1.948373  |
| 6 | -0.507243 | 4.238534  | 1.656787  |
| 1 | -0.199569 | 5.189708  | 2.079676  |
| 6 | -2.275643 | 2.902195  | 0.644071  |
| 1 | -3.293426 | 2.785425  | 0.285085  |
| 6 | -1.822556 | 4.101713  | 1.197661  |
| 1 | -2.502188 | 4.944007  | 1.273664  |
| 6 | 0.484731  | -0.632572 | 1.758729  |
| 6 | 1.237878  | 0.197221  | -0.651260 |

|   |           |           |           |
|---|-----------|-----------|-----------|
| 6 | -1.658932 | 0.413725  | -1.351712 |
| 6 | -2.345008 | -0.340439 | 0.845635  |
| 1 | -3.361388 | -0.028310 | 0.590606  |
| 1 | -2.187787 | -1.380660 | 0.559289  |
| 1 | -2.175442 | -0.226776 | 1.913497  |
| 1 | -2.697285 | 0.704187  | -1.533184 |
| 1 | -0.985619 | 1.075874  | -1.890416 |
| 1 | -1.494543 | -0.615110 | -1.672946 |
| 9 | -0.218593 | -0.387550 | 2.894851  |
| 9 | 0.119862  | -1.878762 | 1.362331  |
| 9 | 1.772269  | -0.709168 | 2.134700  |
| 9 | 0.947769  | -0.965203 | -1.289855 |
| 9 | 2.525322  | 0.119738  | -0.275322 |
| 9 | 1.188032  | 1.163115  | -1.605236 |

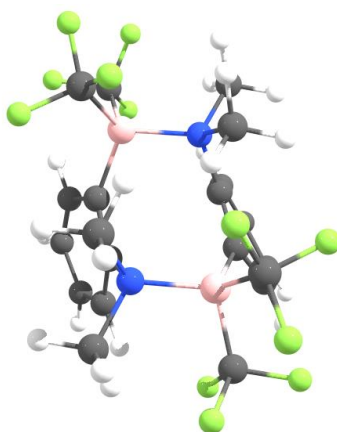

**Figure S98:** Computed structure of aminoalane CH<sub>3</sub>/CF<sub>3</sub> (dimer).

Data for system: CH<sub>3</sub>/CF<sub>3</sub> (dimer)

```
#p m062x/6-31g(d,p) scf=(maxcycles=100) int=ultrafine nosymm freq opt
```

--Link1--

```
#p m062x/def2tzvp scf=(maxcycles=100) int=ultrafine nosymm guess=read geom=check
SCRF=(Solvent=benzene,SMD)
```

```
SCF Done: E(RM062X) = -2131.63290292 A.U.
Zero-point correction=          0.412218 (Hartree/Particle)
Thermal correction to Energy=          0.443009
Thermal correction to Enthalpy=        0.443953
Thermal correction to Gibbs Free Energy= 0.354833
```

Optimized Geometry (XYZ coordinates in Angstrom)

|   |          |          |          |
|---|----------|----------|----------|
| 6 | 2.641348 | 4.177915 | 2.014514 |
| 6 | 1.603725 | 5.137176 | 1.838641 |
| 5 | 0.243327 | 5.159527 | 0.864777 |
| 7 | 3.093715 | 3.187001 | 0.957662 |
| 6 | 1.605795 | 6.129026 | 2.845508 |
| 1 | 0.931222 | 6.963562 | 2.764582 |
| 6 | 2.398882 | 6.117980 | 3.984968 |
| 1 | 2.315748 | 6.927134 | 4.702526 |
| 6 | 3.359605 | 4.092175 | 3.208368 |
| 1 | 4.024714 | 3.260773 | 3.380427 |
| 6 | 3.235432 | 5.041855 | 4.209661 |

|   |           |           |           |
|---|-----------|-----------|-----------|
| 1 | 3.809892  | 4.942033  | 5.124000  |
| 6 | -0.516886 | 2.442773  | 4.540101  |
| 6 | 0.309309  | 1.336601  | 4.493142  |
| 1 | 0.421581  | 0.679662  | 5.348913  |
| 1 | -1.052620 | 2.721739  | 5.440742  |
| 6 | -0.682767 | 3.182224  | 3.380148  |
| 6 | 1.055565  | 1.100804  | 3.346401  |
| 1 | 1.726347  | 0.261071  | 3.400090  |
| 6 | 1.016675  | 1.880630  | 2.168392  |
| 6 | -0.014939 | 2.861633  | 2.197117  |
| 1 | -1.339598 | 4.036938  | 3.414687  |
| 7 | -0.513835 | 3.629374  | 0.987112  |
| 5 | 2.338060  | 1.665612  | 1.164975  |
| 6 | 2.901769  | 3.806276  | -0.390213 |
| 1 | 3.306347  | 4.817377  | -0.364091 |
| 1 | 3.415333  | 3.201333  | -1.132553 |
| 1 | 1.866246  | 3.850172  | -0.657009 |
| 6 | 4.606636  | 3.105296  | 1.007577  |
| 1 | 4.970192  | 2.630694  | 1.907387  |
| 1 | 4.933091  | 2.514122  | 0.155253  |
| 1 | 4.989828  | 4.124034  | 0.939938  |
| 6 | -0.372666 | 2.758956  | -0.220962 |
| 1 | 0.651330  | 2.664427  | -0.516961 |
| 1 | -0.767858 | 1.772116  | 0.017776  |
| 1 | -0.920419 | 3.207940  | -1.045022 |
| 6 | -2.023802 | 3.723711  | 1.081573  |
| 1 | -2.387716 | 4.137961  | 0.144266  |
| 1 | -2.404172 | 2.712401  | 1.229403  |
| 1 | -2.353237 | 4.365644  | 1.885707  |
| 6 | 2.058318  | 0.806661  | -0.254403 |
| 9 | 1.925058  | 1.494769  | -1.425795 |
| 9 | 3.016068  | -0.097458 | -0.535466 |
| 9 | 0.916194  | 0.094190  | -0.122721 |
| 6 | 3.452138  | 0.664171  | 1.904338  |
| 9 | 3.837333  | 1.051828  | 3.152839  |
| 9 | 2.959291  | -0.588862 | 2.035977  |
| 9 | 4.618509  | 0.499853  | 1.237196  |
| 6 | 0.465046  | 5.725628  | -0.704290 |
| 9 | 1.616955  | 6.432216  | -0.764316 |
| 9 | 0.539190  | 4.821074  | -1.723856 |
| 9 | -0.497399 | 6.573878  | -1.112939 |
| 6 | -0.846219 | 6.288292  | 1.437870  |
| 9 | -0.353493 | 7.541511  | 1.308286  |
| 9 | -2.036048 | 6.324607  | 0.793394  |
| 9 | -1.185458 | 6.149854  | 2.750799  |



## 5.2 Aminoalane

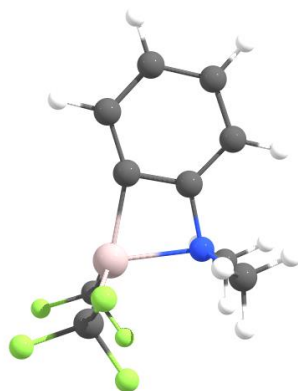

**Figure S98:** Computed structure of aminoalane CH<sub>3</sub>/CF<sub>3</sub> (monomer).

Data for system: CH<sub>3</sub>/CF<sub>3</sub> (monomer)

```
#p m062x/6-31g(d,p) scf=(maxcycles=100) int=ultrafine nosymm freq opt
```

--Link1--

```
#p m062x/def2tzvp scf=(maxcycles=100) int=ultrafine nosymm guess=read geom=check  
SCRF=(Solvent=benzene,SMD)
```

```
SCF Done: E(RM062X) = -1283.41893142 A.U.  
Zero-point correction=          0.194989 (Hartree/Particle)  
Thermal correction to Energy=    0.213201  
Thermal correction to Enthalpy=   0.214145  
Thermal correction to Gibbs Free Energy=  0.147375
```

Optimized Geometry (XYZ coordinates in Angstrom)

|    |           |          |           |
|----|-----------|----------|-----------|
| 6  | 2.906075  | 5.060292 | 2.172382  |
| 6  | 1.916438  | 6.046763 | 2.179936  |
| 13 | 1.100759  | 5.277597 | 0.578786  |
| 7  | 2.716993  | 4.130444 | 1.037391  |
| 6  | 1.975453  | 6.996788 | 3.203064  |
| 1  | 1.234988  | 7.788778 | 3.263205  |
| 6  | 2.988497  | 6.934439 | 4.156839  |
| 1  | 3.029663  | 7.674980 | 4.949352  |
| 6  | 3.931639  | 4.965836 | 3.106218  |
| 1  | 4.681378  | 4.180659 | 3.061903  |
| 6  | 3.958583  | 5.928575 | 4.110254  |
| 1  | 4.739284  | 5.898278 | 4.863240  |
| 6  | 3.841495  | 4.166772 | 0.075563  |
| 1  | 4.750909  | 3.769241 | 0.538379  |
| 1  | 3.577996  | 3.566667 | -0.796785 |
| 1  | 4.008256  | 5.197353 | -0.240572 |
| 6  | 2.434336  | 2.744742 | 1.474429  |
| 1  | 1.587489  | 2.752410 | 2.161958  |
| 1  | 2.175241  | 2.145987 | 0.599829  |
| 1  | 3.311283  | 2.316060 | 1.970885  |
| 6  | 1.462474  | 6.004160 | -1.266233 |
| 6  | -0.484131 | 4.035762 | 0.671956  |
| 9  | -1.669907 | 4.543488 | 0.275907  |
| 9  | -0.266327 | 2.938151 | -0.108912 |
| 9  | -0.691012 | 3.543896 | 1.925655  |

|   |          |          |           |
|---|----------|----------|-----------|
| 9 | 0.460580 | 6.695776 | -1.848046 |
| 9 | 1.760645 | 4.984400 | -2.122349 |
| 9 | 2.549301 | 6.825334 | -1.300148 |

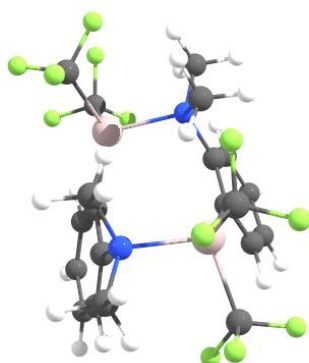

**Figure S98:** Computed structure of aminoalane  $\text{CH}_3/\text{CF}_3$  (dimer).

Data for system:  **$\text{CH}_3/\text{CF}_3$  (dimer)**

#p m062x/6-31g(d,p) scf=(maxcycles=100) int=ultrafine nosymm freq opt

--Link1--

#p m062x/def2tzvp scf=(maxcycles=100) int=ultrafine nosymm guess=read geom=check  
SCRF=(Solvent=benzene,SMD)

SCF Done: E(RM062X) = -2566.85978922 A.U.  
Zero-point correction= 0.395571 (Hartree/Particle)  
Thermal correction to Energy= 0.432060  
Thermal correction to Enthalpy= 0.433004  
Thermal correction to Gibbs Free Energy= 0.325661

Optimized Geometry (XYZ coordinates in Angstrom)

|    |           |          |          |
|----|-----------|----------|----------|
| 6  | 3.114562  | 4.247991 | 1.979449 |
| 6  | 1.951922  | 5.050838 | 2.024531 |
| 13 | 0.273810  | 5.232854 | 0.971000 |
| 7  | 3.354561  | 3.303436 | 0.854974 |
| 6  | 1.839575  | 5.883357 | 3.156720 |
| 1  | 0.984839  | 6.543486 | 3.256373 |
| 6  | 2.777168  | 5.919169 | 4.186112 |
| 1  | 2.630516  | 6.583393 | 5.030915 |
| 6  | 4.049359  | 4.257532 | 3.014376 |
| 1  | 4.915934  | 3.613548 | 2.996530 |
| 6  | 3.881416  | 5.090415 | 4.117053 |
| 1  | 4.623390  | 5.078823 | 4.908213 |
| 6  | -1.112619 | 2.386284 | 4.528209 |
| 6  | -0.004932 | 1.575055 | 4.690938 |
| 1  | 0.193358  | 1.086079 | 5.638570 |
| 1  | -1.805051 | 2.559005 | 5.345104 |
| 6  | -1.348364 | 2.990909 | 3.296964 |
| 6  | 0.868968  | 1.400692 | 3.620578 |
| 1  | 1.729574  | 0.764416 | 3.795192 |
| 6  | 0.686500  | 1.998671 | 2.356823 |
| 6  | -0.477718 | 2.788580 | 2.226202 |
| 1  | -2.214125 | 3.629702 | 3.206129 |
| 7  | -0.786967 | 3.499129 | 0.956481 |
| 13 | 2.295086  | 1.611458 | 1.252422 |

|   |           |           |           |
|---|-----------|-----------|-----------|
| 6 | 2.954890  | 3.883991  | -0.453890 |
| 1 | 3.469424  | 4.835807  | -0.614526 |
| 1 | 3.207600  | 3.174156  | -1.242640 |
| 1 | 1.890782  | 4.062606  | -0.500177 |
| 6 | 4.797401  | 2.932105  | 0.702628  |
| 1 | 5.152343  | 2.360946  | 1.554147  |
| 1 | 4.886461  | 2.305091  | -0.182661 |
| 1 | 5.389119  | 3.845103  | 0.588658  |
| 6 | -0.431947 | 2.689143  | -0.237658 |
| 1 | 0.636883  | 2.551769  | -0.318416 |
| 1 | -0.903023 | 1.703810  | -0.179457 |
| 1 | -0.762467 | 3.220607  | -1.130862 |
| 6 | -2.241613 | 3.822093  | 0.809413  |
| 1 | -2.384161 | 4.269678  | -0.172276 |
| 1 | -2.821774 | 2.899236  | 0.900984  |
| 1 | -2.564591 | 4.541980  | 1.554156  |
| 6 | 2.308299  | 0.648665  | -0.550469 |
| 6 | 3.640119  | 0.468142  | 2.263906  |
| 6 | 0.145425  | 5.846078  | -0.974859 |
| 6 | -1.028475 | 6.540926  | 1.826431  |
| 9 | 4.646106  | 0.042249  | 1.455059  |
| 9 | 4.268655  | 1.099953  | 3.303158  |
| 9 | 3.113545  | -0.659647 | 2.804500  |
| 9 | 2.147225  | -0.676402 | -0.318290 |
| 9 | 1.414316  | 0.954418  | -1.529209 |
| 9 | 3.526208  | 0.770487  | -1.162757 |
| 9 | 1.000920  | 5.383635  | -1.925751 |
| 9 | -1.096140 | 5.591387  | -1.491797 |
| 9 | 0.280210  | 7.194048  | -0.995866 |
| 9 | -2.075534 | 6.805268  | 1.000401  |
| 9 | -0.491999 | 7.751074  | 2.124037  |
| 9 | -1.601670 | 6.110247  | 2.992512  |

## 6. References

- 1 Y. Zhao and D. G. Truhlar, The M06 Suite of Density Functionals for Main Group Thermochemistry, Thermochemical Kinetics, Noncovalent Interactions, Excited States, and Transition Elements: Two New Functionals and Systematic Testing of Four M06-Class Functionals and 12 Other Function, *Theor. Chem. Acc.*, 2008, **120**, 215–241.
- 2 F. Huang, J. Jiang, M. Wen and Z.-X. Wang, Assessing the Performance of Commonly Used DFT Functionals in Studying the Chemistry of Frustrated Lewis Pairs, *J. Theor. Comput. Chem.*, 2014, **13**, 1350074.
- 3 G. Luchini, J. V. Alegre-Requena, I. Funes-Ardoiz and R. S. Paton, GoodVibes: Automated Thermochemistry for Heterogeneous Computational Chemistry Data, *F1000Research*, 2020, **9**, 291.
- 4 A. V. Marenich, C. J. Cramer and D. G. Truhlar, Universal Solvation Model Based on Solute Electron Density and on a Continuum Model of the Solvent Defined by the Bulk Dielectric Constant and Atomic Surface Tensions, *J. Phys. Chem. B*, 2009, **113**, 6378–6396.
- 5 M. J. Frisch, G. W. Trucks, H. B. Schlegel, G. E. Scuseria, M. A. Robb, J. R. Cheeseman, G. Scalmani, V. Barone, G. A. Petersson, H. Nakatsuji, X. Li, M. Caricato, A. V. Marenich, J. Bloino, B. G. Janesko, R. Gomperts, B. Mennucci, H. P. Hratchian, J. V. Ortiz, A. F. Izmaylov, J. L. Sonnenberg, D. Williams-Young, F. Ding, F. Lipparini, F. Egidi, J. Goings, B. Peng, A. Petrone, T. Henderson, D. Ranasinghe, V. G.

- Zakrzewski, J. Gao, N. Rega, G. Zheng, W. Liang, M. Hada, M. Ehara, K. Toyota, R. Fukuda, J. Hasegawa, M. Ishida, T. Nakajima, Y. Honda, O. Kitao, H. Nakai, T. Vreven, K. Throssell, J. A. Montgomery, Jr., J. E. Peralta, F. Ogliaro, M. J. Bearpark, J. J. Heyd, E. N. Brothers, K. N. Kudin, V. N. Staroverov, T. A. Keith, R. Kobayashi, J. Normand, K. Raghavachari, A. P. Rendell, J. C. Burant, S. S. Iyengar, J. Tomasi, M. Cossi, J. M. Millam, M. Klene, C. Adamo, R. Cammi, J. W. Ochterski, R. L. Martin, K. Morokuma, O. Farkas, J. B. Foresman, and D. J. Fox, Gaussian 16, Revision C.01, Gaussian, Inc., Wallingford CT, 2016.
- 6 T. Lu and F. Chen, Multiwfn: A Multifunctional Wavefunction Analyzer, *J. Comput. Chem.*, 2012, **33**, 580–592.
- 7 D. M. Andrada and C. Foroutan-Nejad, Energy Components in Energy Decomposition Analysis (EDA) Are Path Functions; Why Does It Matter?, *Phys. Chem. Chem. Phys.*, 2020, **22**, 22459–22464.
- 8 M. Gimferrer, S. Danés, D. M. Andrada and P. Salvador, Merging the Energy Decomposition Analysis with the Interacting Quantum Atoms Approach, *J. Chem. Theory Comput.*, 2023, **19**, 3469–3485.
- 9 I. Funes-Ardoiz and R. S. Paton, GoodVibes: Version 2.0.3, *GoodVibes: version 2.0.3*, Zenodo, 2018.
- 10 J. Contreras-García, E. R. Johnson, S. Keinan, R. Chaudret, J.-P. Piquemal, D. N. Beratan and W. Yang, NCIPLOT: A Program for Plotting Noncovalent Interaction Regions, *J. Chem. Theory Comput.*, 2011, **7**, 625–632.
